# Supplementary material for: Similarities and Differences of Photosynthesis Establishment Related mRNAs and Novel lncRNAs in Early Seedlings (Coleoptile/Cotyledon vs. True Leaf) of Rice and Arabidopsis
Source: Front Genet. 2020 Sep 8;11:565006. doi: 10.3389/fgene.2020.565006 (PMC7506105; doi:10.3389/fgene.2020.565006)
Supplement: TABLE S5 — The normalized FPKM values for all lncRNAs and mRNAs in all samples in rice and Arabidopsis. [file Table_5.XLSX]

## Sheet: Sheet1
TABLE S5 The normalized FPKM values for all lncRNAs and mRNAs in all samples in rice and Arabidopsis.
name	cpt_A	cpt_B	cpt_C	icl_A	icl_B	fcl_A	fcl_B	fcl_C	name	cot_A	cot_B	cot_C	ftl_A	ftl_B	ftl_C	stl_A	stl_B	stl_C
OS08G0538300	29.9597	27.9514	29.8397	27.7828	31.1264	24.5536	24.5627	24.378	AT1G22500	0.207625	0.134389	0.0968	0.20555	0.0220417	0.13206	0.243701	0.248657	0.29505
OS05G0453100	0.684808	0.771277	0.939952	0.357881	0.355389	0.404212	0.43511	0.450378	AT3G03285	0	0	0.13044	0	0	0.0635546	0.149269	0	0
OS11G0195800	2.28402	1.28869	1.53457	1.4878	1.36379	0.925246	1.31169	0.818672	AT3G28200	8.68034	7.92308	8.92131	9.31984	7.17931	7.78577	4.85855	4.75996	4.29546
OS06G0214100	7.62998	8.37964	7.96149	9.81163	15.0142	13.1729	14.9152	13.4214	AT3G03280	0.027786	0	0.0285	0	0	0	0.032614	0	0
OS03G0138000	8.36579	8.24435	8.4119	6.02283	5.30166	6.81343	6.26591	6.74515	AT5G64850	31.3401	30.0091	25.127	59.141	50.435	42.4275	20.2704	17.1461	21.8249
OS08G0558800	30.4935	24.0737	24.474	36.358	22.8582	20.64	17.454	9.20445	AT3G62110	6.64347	6.52268	5.66666	7.45252	6.49201	5.70642	9.1516	10.1234	10.6013
OS06G0602600	27.2404	15.8004	18.4065	29.2345	20.0599	18.3927	20.3931	10.2467	AT2G29130	0.0368787	0	0	0	0	0.0245737	0.0144288	0	0
OS02G0293300	0.164944	0.175401	0.237398	0.951222	0.628307	0.277099	0.328806	0.0487496	AT4G32000	0.889035	0.789441	0.694766	1.19527	1.17003	1.42458	2.733	2.33544	2.07355
OS01G0653700	7.355	8.01145	7.411	9.22061	8.77361	7.81073	6.59015	7.88783	AT1G51965	0.891778	0.854929	0.977776	1.32712	1.11322	1.20894	1.99721	2.02555	1.83731
OS03G0322800	22.6311	20.9634	24.0426	12.7348	11.4847	15.4223	13.7131	13.7576	AT5G17522	0.117198	0.298014	0	0	0.0684302	0.23428	0	0.289491	0.0610669
OS04G0337201	24.175	22.9878	21.8609	20.746	19.8767	16.9649	16.4254	14.8231	AT1G48270	1.18151	0.90132	1.12277	1.55579	2.00874	1.5109	1.93745	2.33192	2.26338
OS03G0212600	1.77562	1.70924	2.47329	8.39583	7.05111	7.01732	6.10175	1.93426	AT5G65180	2.65124	2.17082	2.39304	5.21305	4.84532	4.59764	4.04548	5.86123	5.16664
OS09G0441900	1.80285	2.20547	2.19481	5.03336	4.76176	4.73237	4.64382	3.53868	AT1G13190	4.11555	3.92519	3.31247	5.95327	7.03888	6.22273	8.18337	9.36912	10.2423
OS12G0114500	4.85756	2.5763	1.77904	5.71388	5.20175	2.93778	1.87154	1.13657	AT3G56820	0.853366	0.771545	0.534902	1.79746	1.21799	1.21624	2.15168	1.74358	2.22327
OS01G0607100	1.09781	0.618882	0.459499	0.189531	0.550155	0.263467	0.0768102	0.0366948	AT1G13195	1.03633	0.616238	0.735898	1.38902	1.60119	1.25892	0.842124	1.22086	1.4289
OS04G0670700	21.0589	16.7955	18.7629	27.0871	28.3764	24.7492	27.8055	20.1416	AT3G14550	0.0426426	0.173493	0.0984114	0.335387	0.236536	0.191797	0.425442	0.535438	0.577703
OS12G0407500	46.1079	45.7861	44.285	44.4431	40.2038	33.8091	33.5134	25.0695	AT5G61510	5.52198	5.9202	4.9325	8.20659	9.37249	7.50818	7.18215	9.0523	8.76145
OS03G0731100	55.8401	46.1279	50.0236	47.3991	39.2753	73.9304	67.5903	59.1676	AT5G50850	22.8315	23.1645	21.4068	28.8908	26.2776	24.4943	30.2094	30.8206	31.5801
OS10G0118000	0.348202	0.210293	0.428782	0.390313	0.916811	2.51789	2.13543	2.72045	AT1G16070	0.0510376	0.0778683	0.0872486	0.185268	0.178801	0.306075	0.34945	0.553301	0.647113
EPlOSAG00000000424	175.306	144.55	161.439	192.189	193.314	196.338	148.98	110.13	AT4G17360	3.70459	2.9438	3.08732	2.87166	2.70383	3.14349	3.12532	3.92401	4.26277
EPlOSAG00000000420	0	0	0	0.429954	0.394117	0	0	0	AT5G20990	5.89907	5.73121	5.67658	8.79279	7.45309	6.67078	9.44969	9.81934	10.0717
OS03G0241900	12.0962	10.9184	12.7086	11.6218	11.3697	18.2927	18.7129	30.2903	AT1G28410	1.60873	1.65065	1.83823	3.19308	2.38949	2.55295	3.97527	3.9505	4.39711
OS08G0185300	37.8757	29.36	35.4311	17.6475	15.2666	19.4722	15.8236	10.6345	AT1G66750	1.28993	1.38296	1.32308	2.44671	2.56487	2.3521	2.59846	3.3298	2.70669
OS04G0309400	6.40706	9.30494	6.97332	12.9165	17.2255	11.2594	14.1745	13.0087	AT2G41000	1.6998	1.5662	1.4153	3.38763	2.35863	1.91883	2.04209	1.89353	1.47964
OS02G0318100	0.0542702	0.0228438	0.42402	0.291494	0.133599	0.0303906	0.0945059	0.0338615	AT4G26840	8.34949	7.13116	7.77955	20.0903	20.9148	16.85	17.4684	20.0207	28.2622
OS05G0169000	13.9321	11.2273	13.0696	10.2401	10.3072	12.2776	14.1897	12.5818	AT3G16020	0.108564	0.165637	0.19487	0.0656821	0.158474	0.24415	0.222999	0.402249	0.169706
OS04G0628000	3.98331	4.50727	4.2181	5.84156	5.71825	2.85717	3.40494	2.13629	AT3G52170	2.26386	1.9737	2.23911	4.67963	5.39752	4.24265	5.52006	6.42413	6.36146
EPlOSAG00000030859	0.830133	0.599016	1.85313	9.36344	10.3346	6.77372	6.66004	6.21547	AT1G75520	0.0161252	0.065606	0.0992374	0.0975583	0.0564918	0.112821	0.0378541	0.212432	0.117631
EPlOSAG00000030858	0	0	0	0.424064	0	0	0	1.47785	AT1G71860	6.30612	6.9989	5.80706	10.2232	9.52048	8.94959	9.87594	10.7001	12.0179
EPlOSAG00000030857	0.607963	0.767727	1.78129	0.783713	0.538793	0.408541	0.635223	2.50361	AT1G71866	0.0779619	0.0792977	0.0533101	0.817567	0.45521	0.363643	0.549049	0.385149	0.379146
EPlOSAG00000030855	1.14355	0.433217	0.893471	1.28986	0.337814	1.15267	0.746766	0.856213	AT1G71865	2.6859	2.23171	2.75492	3.70771	3.31323	4.04577	5.06191	6.13611	6.22883
EPlOSAG00000030852	0.320194	0	0.312715	0	0	0	0.209094	0	AT2G43530	5.65687	5.21099	6.02119	18.4683	18.8207	18.0291	36.9573	49.565	56.1707
OS11G0619000	0.879236	1.62609	1.13592	0.624711	0.899865	1.70969	1.98922	1.6717	AT2G43535	2.13701	2.0612	2.34309	2.71955	2.06528	0.957498	6.27081	8.22134	10.5591
OS04G0495300	5.57138	5.25637	3.62749	10.7316	9.55339	3.49643	3.05278	0.599349	AT5G12300	0.216287	0.109997	0.269383	0.392564	0.396903	0.308829	0.453336	0.546973	0.660091
EPlOSAG00000005565	0	0	0.843276	0	0	0	0	0	AT3G13010	0	0	0	0.0343851	0.0663697	0.0852095	0.0166774	0.0350968	0
OS08G0536300	48.1459	50.8168	55.8422	14.6516	19.2227	6.86116	6.2098	9.28024	AT1G17300	0.0766292	0	0	0	0	0.0255305	0.0299813	0	0
OS01G0138000	0	0	0	0.173265	0.0529411	0.0602141	0.0468122	0.0670913	AT1G78920	6.15301	5.89819	5.51333	10.9493	9.69127	10.0718	15.2675	16.165	15.3863
OS09G0389201	2.48032	2.06204	2.23512	2.49168	2.8413	1.89118	1.79339	1.84088	AT4G11400	0.0249045	0.126656	0.0255444	0.135606	0.10179	0.0497844	0.175391	0.174298	0.311441
OS07G0142100	2.36956	3.40655	3.02627	89.7568	57.399	1541.9	1355.41	2107.16	AT1G78922	0	0	0	0	0.0363957	0	0	0.0256617	0.0324794
OS03G0782900	0.544714	0.621716	0.634296	0.979001	0.557007	0.668725	0.834553	0.56863	AT1G64450	0.536698	0.419919	0.55049	1.62353	1.08475	1.73309	2.10792	2.2605	2.04361
EPlOSAG00000031331	0.523954	0	0	1.1257	0.257967	0	0	0.326918	AT4G21090	3.06299	2.3366	2.25809	6.42802	6.34337	5.6446	5.44897	5.75325	6.1845
OS03G0296100	0	0	0	0	0.0569808	0.0648088	0	0	AT1G64455	0.0420921	0.12844	0.0863474	0.0509319	0.0491541	0.0420713	0.0988116	0.0346574	0.043865
OS03G0669900	0	0	0	0	0	0	0	0.0239261	AT3G24929	1.43265	1.61584	1.74203	1.90827	1.89563	1.90541	3.88526	3.61966	3.34719
OS02G0159300	0.0477902	0.0603487	0	0.0770067	0.141176	0	0	0	AT1G68920	1.92041	2.22274	2.01504	2.1234	2.75816	2.66961	3.88637	4.70729	4.0026
OS01G0884500	12.3218	12.9856	13.381	13.3632	15.6982	15.8833	16.0218	17.2558	AT2G35155	3.67554	3.78212	3.78098	6.18493	5.96905	5.81585	7.52153	9.3084	6.95718
OS02G0177633	0.616623	0.389331	1.0727	5.18532	3.04541	2.75161	2.08885	0.82959	AT2G01422	0	0	0	0	0.237053	0.0338158	0.0794221	0.0278567	0.105773
OS07G0154900	0.907923	0.642046	0.815778	0.936308	0.429133	0.183033	0.569179	0.339895	AT2G35150	0.0230874	0.023483	0	0	0.0269609	0.0461521	0.0541979	0	0.0240599
EPlOSAG00000036023	0	0.288811	0.111684	0.552798	0	0.384223	0.149353	0	AT5G17520	2.34947	2.37421	2.09688	2.76904	3.63445	3.1565	5.5154	6.25566	5.61231
EPlOSAG00000036026	0	0	0	0	0	0	0.16188	0	AT3G06840	1.9212	2.24073	1.70783	4.18442	4.3375	3.99413	5.68265	5.10414	5.36569
OS06G0127825	0	0	0	0.469041	0.214973	0.366759	0	0.136216	AT5G10930	2.13979	1.90896	1.42231	0.911273	1.53557	1.89977	1.78197	1.752	1.94339
OS07G0448100	2.65861	3.87683	2.27195	3.00897	1.75307	0.717808	1.13676	0.740546	AT1G14970	0.947952	1.27147	1.31422	2.48314	1.75173	1.77003	2.99563	3.64527	3.22418
OS11G0244200	0.0258221	0	0	0	0	0	0	0	AT2G03420	6.01572	5.92226	5.48325	11.3005	10.2442	9.82384	14.6209	17.3838	18.1092
OS03G0118900	5.17278	5.1074	4.54259	5.76257	5.32942	5.95429	5.24068	5.14012	AT5G17830	0.0299519	0.0152326	0.0153608	0.235574	0.227351	0.254466	0.298828	0.4809	0.265315
OS09G0447500	0.0206355	0.0260582	0.040307	0	0	0	0	0	AT5G55310	5.5022	5.68205	6.35982	10.2818	10.4534	8.964	11.3562	11.9632	11.4767
OS05G0345700	0	0	0	0	0	0.0231526	0	0	AT1G62120	0.492767	0.431598	0.631786	1.42438	1.08694	1.20395	1.5263	1.87086	1.84012
OS04G0602700	2.30471	1.80268	1.69656	2.9377	2.41339	2.13817	1.34779	1.35216	AT5G28420	0	0	0	0	0	0	0.0738487	0	0
OS04G0676700	10.2505	7.83418	8.50252	7.65175	6.3352	7.22697	7.8525	6.47536	AT2G07213	0.0808927	0.0822788	0.0622286	0	0	0	0	0	0
OS07G0525900	0.0160498	0	0	0	0	0	0.104809	0	AT1G22070	2.55324	2.44584	2.60499	1.3077	1.75111	2.01188	10.4177	12.7359	12.6141
OS08G0107100	18.9888	28.8899	22.5285	32.4471	33.8739	16.5118	17.6251	17.8136	AT4G25570	33.4458	29.8752	28.1496	39.1977	33.6091	36.8226	38.1517	41.064	41.0174
OS02G0448000	0.188066	0.383632	0.197802	0.792566	0.854711	0.607582	0.245623	0.460343	AT3G03860	7.43033	6.59458	6.00813	7.45672	6.69044	7.82768	9.64439	9.94987	9.21502
OS07G0626700	1.28177	1.63742	1.04804	3.7465	4.64501	1.12674	1.28474	1.19963	AT4G16180	3.62746	3.51536	3.75887	5.51587	4.61878	4.03514	6.86311	7.8379	7.40525
OS09G0522800	2.07782	1.55232	2.26302	0.157763	0.0642727	0.0913782	0.170496	0.0407259	AT3G03865	0	0	0	0	0	0	0.0956676	0	0
OS03G0162800	9.49667	10.0625	8.70182	3.47383	4.11136	2.75069	3.3859	3.3458	AT5G26340	0.291904	0.402943	0.35287	0.819944	0.46262	0.09378	0.991161	1.72533	1.28198
OS07G0110800	37.6642	27.7996	35.7579	22.9117	23.6326	26.8793	31.4214	23.4457	AT2G34200	0.276879	0.281624	0.567988	0.574332	0.207857	0.217441	1.83386	1.66095	2.59687
OS02G0779300	32.0719	30.6898	29.4772	0.930392	0.736546	1.76365	0.3085	1.22817	AT3G24070	0.91229	1.1519	1.12933	1.18001	1.41434	1.27343	1.5139	1.99444	2.60627
OS02G0752800	61.7119	107.147	74.3482	99.6453	135.757	77.4282	75.0313	117.884	AT5G42146	1.93815	1.64951	1.09541	0.717915	0.415713	0.790694	0.139281	0.29311	0.618303
OS04G0165801	0.208369	0.631501	0.691907	0	0.246216	0.280041	1.19742	0.468038	AT4G30530	12.7732	12.812	6.53938	13.6611	16.7259	13.6077	10.6793	10.9363	15.895
OS01G0956700	4.14233	3.80294	3.39197	1.004	0.783973	1.45382	1.06996	2.24621	AT1G27640	0	0	0	0	0	0	0	0.0498785	0
OS08G0170800	13.376	15.0817	13.7581	6.94292	8.06341	13.2999	13.1125	15.5041	AT2G25420	0.804444	0.779724	0.941603	2.04984	1.35938	1.64593	3.24368	3.29619	3.05743
OS11G0128600	1.92535	2.00847	2.77969	3.16986	1.48373	1.19536	1.14797	1.41023	AT4G13290	0.0230281	0.0936908	0.0118099	0.153253	0.0403375	0.0690503	0.0135147	0	0.0479961
OS01G0117700	0	0.0502281	0	0.0640925	0.0587503	0.0668215	0.0259745	0.11168	AT1G19835	9.34208	9.76113	9.86338	13.9582	11.0238	12.6262	13.7086	15.4754	15.4776
OS12G0131300	2.46415	1.95513	2.42789	1.1947	0.901861	1.1723	0.825935	0.816366	AT4G19630	0	0	0	0.0487208	0	0.0804898	0.0472609	0	0.0839213
OS07G0576500	0	0	0	0	0.125869	0.0477202	0.13603	0.0177235	AT1G19830	0.0324058	0	0.0332386	0.235268	0.151371	0.0971696	0.570548	0.346866	0.472791
OS01G0938200	12.4206	14.3367	14.205	27.1461	21.9005	22.9404	19.6111	14.5528	AT1G02190	0	0	0	0	0	0.0122476	0.143828	0.201786	0.114928
OS04G0596400	38.7035	30.8559	34.0077	18.445	19.8635	24.8785	21.7197	24.5733	AT3G57480	0.601223	0.659804	0.55176	1.26353	0.702094	0.98046	0.872826	0.846761	0.824404
OS04G0455600	5.19499	2.81149	3.28214	11.3042	11.5822	13.7144	11.1741	6.63128	AT3G59540	71.3783	55.635	48.7311	134.667	113.232	102.474	75.4504	95.7305	113.108
OS02G0720300	5.32161	5.00003	4.05266	6.32915	5.07641	7.66293	5.97807	6.61112	AT3G47720	0	0.0439481	0	0	0	0	0.0253577	0	0
OS06G0106100	91.1047	75.2952	85.2666	60.9965	50.8205	64.2122	58.7504	56.8859	AT5G11960	5.73211	4.87954	4.63117	7.68286	7.24992	6.11712	7.53547	8.66964	8.28945
OS02G0120500	0	0.0450305	0	0.186746	0.118509	0.284557	0.326013	0.383806	AT1G04647	0.145651	0	0.0995957	0.0293732	0.0283479	0.0242632	0.0854792	0.139912	0.252976
EPlOSAG00000042409	7.73456	11.6575	10.9653	10.0509	17.3207	19.281	19.5517	22.8842	AT5G18430	0.688681	0.603193	0.961459	4.16656	3.90943	3.28875	3.25583	3.71726	3.64825
EPlOSAG00000042408	1.20073	2.38269	1.84278	3.59319	1.77353	1.44084	1.79224	1.28432	AT1G14350	3.63905	3.61967	3.53239	3.81989	3.67315	2.98324	3.44942	3.45944	3.80429
EPlOSAG00000051443	0.400243	0.50542	0	0	0	0	0	0	AT4G10750	4.02176	3.87423	4.25606	6.77172	7.40508	6.40187	7.0184	7.58643	8.1162
EPlOSAG00000051445	0	0	0.24055	0.396881	0	0	0	0	AT2G40840	9.64941	14.2206	14.664	6.63511	5.62035	6.44291	49.9068	56.5182	55.6566
EPlOSAG00000051447	0.50557	3.83055	2.96256	0	2.24024	1.69867	7.92358	4.7317	AT5G42140	1.99689	1.84457	1.79043	2.75321	2.84747	2.6612	3.41214	4.12722	3.53911
EPlOSAG00000042400	0.120073	0.151626	0.234536	0.386959	1.41882	0.605152	0.156821	0.674267	AT3G18790	1.94849	1.94302	2.48841	5.13146	4.8408	3.13133	5.22435	4.98601	7.02734
EPlOSAG00000042403	0	0	0	0	0.194359	0	0	0	AT3G17770	2.30577	2.10266	2.22521	7.14681	8.03806	5.08608	8.74583	8.8659	8.35684
EPlOSAG00000042402	0.202228	0.25537	0.197504	1.30344	0.896097	0	0.264119	0.378536	ATMG00230	0	0.94337	0	0.748172	0.361028	0.309007	0	0.254552	0.644362
EPlOSAG00000042405	0	0	0	0	0	0	0	0.461038	AT2G13610	1.27026	1.44612	1.74517	9.88491	10.1251	11.0307	12.8169	14.6137	12.3025
OS02G0724100	0.0380806	0	0	0.0306806	0.112493	0.0319869	0.0248675	0.213841	AT1G26515	0	0	0	0	0.0570562	0	0	0	0
OS05G0323100	3.43305	4.17986	3.14535	7.6761	5.66537	5.14743	5.14095	3.30723	AT3G28970	4.89782	5.58876	4.58041	7.79398	7.93047	6.70547	8.40587	9.64124	9.95088
OS01G0755600	0.727255	0.459183	0.414323	1.90428	1.29797	0.916318	1.22686	0.453766	AT5G62480	0.0782643	0.0265351	0	1.92558	1.64511	0.0782258	0.0306211	0.0214802	0
OS09G0558050	1.22321	0.363448	0.843276	0.231885	0.212557	0	0	0	AT5G14240	4.90655	4.06056	3.38559	9.22931	6.69339	5.77351	8.50775	9.18162	9.57566
OS12G0123700	29.9175	31.6585	28.7246	0.720364	1.23376	1.91712	1.16775	1.78373	AT1G47230	1.52508	1.88613	1.59982	3.73266	3.33928	3.18723	5.08542	5.70775	5.7432
OS08G0233900	1.43844	2.00116	2.33346	0.0392851	0.0360107	0	0.222892	0.136907	AT4G18580	0.495268	0.697506	1.05507	0.460984	0.578361	0.456945	0.581323	0.972419	0.635235
OS01G0800300	5.26847	5.55156	4.84612	6.13436	5.7101	4.0591	3.37117	4.633	AT4G19180	2.27954	1.98244	2.09474	2.55319	2.69167	2.91366	3.97861	4.60504	4.36253
OS02G0160300	0.233118	0.0173163	0.05357	0.243057	0.0810176	0.207333	0.268644	0.0770041	AT4G19185	0.702299	0.776994	0.657158	1.0436	0.705022	1.02214	2.44406	2.23185	2.46528
OS09G0559900	0	0.0402324	0.015558	0.0513378	0.0823528	0.0936664	0.0312081	0.0745459	AT2G24070	0.120962	0.0351529	0.0354488	0.115002	0.141257	0.112267	0.202829	0.256106	0.288131
OS04G0639300	3.87435	2.70905	1.50103	11.7119	14.1409	61.8062	62.4356	73.66	AT1G05610	0.0496252	0.100951	0.0509004	0.120094	0.154536	0.165336	0.174743	0.217919	0.155146
OS01G0939550	0.146654	0.555576	0.429685	0	0.577637	0.328496	0	0.0915036	AT1G08260	1.5182	1.66849	1.74207	3.06049	3.03928	2.94636	4.55358	4.69079	4.18615
OS05G0297800	0.119674	0.221646	0.0935028	0.102846	0.235685	0.0268063	0.19798	0.164273	AT1G33980	4.76505	4.34777	4.45625	6.85391	6.66923	5.8133	9.0338	10.7124	10.0776
OS02G0605400	0.096299	0.101337	0.0313499	0.258619	0.165944	0.188741	0.524046	0.0901276	AT5G18380	64.769	50.7357	51.5413	124.256	111.7	105.026	106.467	120.071	130.301
OS04G0439100	80.8278	83.3171	100.64	58.0595	80.7586	86.9973	98.1104	103.25	AT4G38090	2.29452	2.04859	1.75203	3.64016	2.88788	3.28719	4.51859	4.91202	6.403
OS04G0558700	0.188145	0.316781	0.285833	0.875815	0.98808	1.54526	1.06481	0.508697	AT4G38092	0.162274	0.123791	0.249665	0.245441	0.0947495	0.202742	0.0476174	0.167014	0.338217
OS01G0115700	0	0	0	0	0	0.0513112	0.0398908	0.0571716	AT1G50890	1.55871	1.46559	1.65454	1.31585	1.51333	1.51265	1.80827	1.74602	1.69992
OS05G0368600	0.0169564	0.214123	0.0828018	0.355196	0.150272	0.142431	0.0664378	0.0952187	AT1G22020	3.71809	3.71028	3.58824	5.42424	5.19385	4.9638	5.60218	5.91285	6.20135
OS04G0320700	416.105	415.052	373.821	26.6176	33.1225	56.8325	50.3748	67.4744	AT3G54630	0.334122	0.184084	0.528342	1.07811	1.15428	0.918383	2.14064	2.22378	2.36483
OS05G0154900	17.7592	13.7835	15.0232	18.2265	15.1796	15.6383	14.9743	11.1219	AT5G07090	90.8345	82.5226	77.6799	149.477	146.032	144.058	132.934	147.382	155.205
EPlOSAG00000041189	0.830133	1.19803	0.347461	0.191091	0	0	0.619539	0.221981	AT3G10090	5.34937	4.57657	2.56394	8.77155	7.06421	5.64655	6.33753	6.29804	8.96118
EPlOSAG00000041185	0.11859	0	0	0.382181	0.175163	0	0.464654	0.443962	AT1G37150	0.124586	0.0563206	0.0567946	0.234502	0.129324	0.124525	0.113738	0.205162	0.158686
EPlOSAG00000041181	0.748506	0.157533	1.09653	1.00509	2.02689	1.46703	1.14051	1.40108	AT2G08795	0	0	0	0	0	0	0.278152	0.390239	0.370437
EPlOSAG00000036846	0.403042	0.169651	0.131209	0.21648	0.198436	0.225698	0	0.251475	AT2G42720	0.0876594	0.0148602	0.089912	0.123747	0.238855	0.131424	0.102891	0.0360881	0.167478
EPlOSAG00000036840	0.600364	1.51626	0.29317	0	1.33014	1.26073	0	0	AT3G58320	0	0	0	0	0	0	0	0.032809	0
OS06G0102900	6.84491	8.63399	7.43943	10.4873	11.511	9.03231	8.89983	10.3789	AT5G52547	0.0224702	0.0228552	0.0460952	0.135946	0.236161	0.157214	0.237371	0.370026	0.398083
EPlOSAG00000036848	0.548904	0.173287	0	1.32671	3.24302	0.230534	0.179224	0	AT1G04563	0.216039	0.10987	0.110795	0.261409	0.126142	0.539831	0.76073	0.08894	0
EPlOSAG00000036849	0.495784	0.156517	0.242102	2.19693	1.09844	1.04112	0.323759	1.16003	AT3G18240	1.29203	1.15772	0.92556	2.41951	2.51467	2.53155	2.82845	3.79936	3.95387
EPlOSAG00000023010	4.85347	5.61814	5.33261	16.293	18.5193	13.9291	9.77241	3.78536	AT1G04567	0	0	0	0	0	0	0.079723	0	0.353911
EPlOSAG00000023015	1.1301	0.713534	0.55185	2.73147	0.8346	0.949258	1.47596	1.05767	AT3G58980	0.467116	0.398488	0.309109	0.565215	0.633468	0.54219	1.13193	0.756812	0.957879
OS10G0194300	0.681748	0.439059	0.306279	0.845871	0.845855	0.732997	0.578757	0.357312	AT3G05425	0	0	0	0	0	0	0	0	0.212346
OS11G0461000	8.31579	8.74768	7.97361	54.3471	75.315	28.8564	26.7003	26.3776	AT3G05420	8.24708	7.25394	7.37	11.4714	10.5074	9.38996	14.0606	14.4638	14.5737
OS06G0220300	0.0193471	0.0244312	0	0.0935247	0.0857294	0.195014	0.151609	0.289715	AT5G35375	0.100174	0.0509455	0.0513743	0	0	0	0	0	0.0521969
OS04G0543033	0.742268	0.606504	1.10872	1.89961	0.644919	0.733517	0.741335	0.735564	AT4G04860	1.5615	1.50884	1.72175	2.43264	2.16538	2.146	4.53623	5.57669	4.5767
EPlOSAG00000025466	0	0.292291	0	0	0	0	0	0	AT1G22400	2.19376	2.16373	2.82289	10.9236	9.43992	6.44515	5.38396	6.26176	5.6392
OS11G0167300	1.04746	1.14376	0.794324	1.48926	1.25592	1.05581	0.957623	0.542067	AT3G54180	0.156037	0.297582	0.24007	1.34524	0.842748	1.09172	2.40383	3.01919	3.41479
EPlOSAG00000044845	0.0995422	0.628502	0.291651	0	0.294056	0	0.130007	0.558978	AT1G73160	0.0158124	0	0	0	0	0	0.0185598	0	0
OS07G0586200	13.2216	13.6154	10.6472	35.9055	26.7839	14.3443	14.4517	13.679	AT1G20570	0.135287	0.189208	0.1908	0.204624	0.207356	0.287344	0.545856	0.494301	0.511073
EPlOSAG00000003194	3.84233	4.85203	2.25155	10.7316	10.5939	4.73363	4.34916	1.43844	AT5G48120	2.95421	2.52039	2.35676	4.66493	4.93803	4.30369	4.6838	5.10329	5.32558
EPlOSAG00000003195	3.84233	3.23469	2.00138	4.54031	5.67528	8.6066	4.34916	5.27427	AT1G53600	0.085841	0.0388053	0.0782638	0.196196	0.144795	0.23833	0.615733	0.895266	0.934324
EPlOSAG00000003196	5.12311	3.55816	4.25292	28.4801	14.3774	9.46727	7.02557	7.67167	AT1G11450	0.171218	0.0949921	0.0957917	1.16772	0.799778	0.85567	0.730794	1.02528	1.24901
EPlOSAG00000004212	0	0	0.146585	0	0	0	0	0	AT5G10840	11.3206	9.94716	9.86067	20.0236	16.5976	16.7415	20.5089	21.2091	19.9383
OS09G0480300	2.05649	2.17978	2.05008	3.09052	2.03026	1.98697	2.1988	2.23385	AT5G11030	1.11699	1.44782	1.2775	2.11707	1.98546	2.22301	2.8194	2.66143	2.4929
EPlOSAG00000004217	0.231466	0	0	0	0	0	0	0	AT3G45640	5.28382	5.0357	4.97415	8.63558	6.30556	7.90013	12.9476	14.0171	12.5515
EPlOSAG00000004219	0	0	0	0	0	0	0.468997	0	AT5G62240	0.404067	0.375253	0.378411	0.72276	0.656501	0.70238	0.371173	0.376092	0.164773
OS03G0562400	0.155518	0.130924	0.172137	0.451069	0.153138	0.0348352	0.0406228	0.0388137	AT5G38300	0.162029	0.141262	0.332386	0.896261	0.648732	0.624662	1.71164	2.00115	3.15998
OS03G0289850	0.227935	0.431749	0.302114	0.550924	0.480956	0.164109	0.0425277	0	AT5G07095	5.57149	3.51742	3.54703	15.3429	15.7047	11.7136	13.5301	12.6549	21.0223
OS05G0554000	27.544	39.4511	68.3881	29.7673	25.6557	12.1882	13.0711	19.0323	AT5G14740	411.561	356.861	331.306	432.734	428.275	458.81	215.28	224.266	216.694
OS03G0207200	2.76692	2.68771	2.63665	3.48375	4.93071	2.9546	3.02852	2.30653	AT5G13520	1.75232	1.69689	1.39109	3.79044	3.74223	3.91078	4.94475	6.12698	6.31638
EPlOSAG00000009126	0	0.391293	0.605255	0.998603	0.457684	0	0	1.16003	AT5G25210	0.157599	0.267165	0.242473	0.603871	0.705486	0.630084	4.68622	5.1256	5.66617
EPlOSAG00000009125	3.31235	2.92795	9.70494	2.13494	2.93549	1.66938	3.02826	0	AT1G51760	3.03459	2.98119	2.42932	3.83309	4.68463	3.22544	2.74524	3.27864	3.77946
OS01G0155200	0	0	0	0	0	0.0506072	0.0393435	0.0140968	AT4G03090	1.39896	1.50531	1.55574	3.33206	3.33613	3.56191	4.86561	5.42588	5.40952
EPlOSAG00000022769	6.40388	3.23469	0	4.12756	0.945881	5.37913	5.01827	1.1987	AT3G55580	0.138962	0.266981	0.174207	1.60672	0.540921	0.262354	0.724921	0.546659	0.804527
OS04G0518100	47.16	65.5865	63.9464	122.642	163.179	103.14	125.157	91.2854	AT1G19300	0.799074	0.585192	0.590118	0.657484	0.503895	0.75076	1.31308	1.40798	1.41564
EPlOSAG00000009129	0	0	0	0	1.33312	0	0	0	AT3G26539	1.1397	0.46369	0.935186	2.62019	3.06109	3.75915	4.94958	5.63035	5.34465
EPlOSAG00000009128	0	0	0.302627	0	0	0	0.404699	0	AT2G05210	2.26051	2.72133	2.80024	4.06983	4.28485	4.19135	7.47279	8.38907	7.93208
OS01G0946100	0.472418	0.298281	0.450397	1.9937	1.52847	1.83293	0.9255	0.631632	AT1G08480	12.7013	10.7911	8.92012	12.9459	14.2041	13.0833	17.3987	21.211	21.5517
OS01G0758950	0	0	0	0.233342	0.0831805	0.0540616	0.0630435	0	AT1G08483	0	0	0	0	0	0.164426	0	0	0
OS05G0198200	38.2319	44.8958	38.8713	28.9217	41.0949	25.2669	36.0625	26.5767	AT1G20910	2.11879	2.30475	1.84121	6.53402	6.09976	5.41201	7.16722	7.87469	7.88144
OS03G0812200	21.4041	21.9593	19.9264	24.6653	26.9716	29.3315	28.7785	31.2011	AT2G18465	2.42774	1.64623	1.85667	4.09717	3.606	3.93782	3.29951	3.78745	3.97254
OS02G0603000	0.157238	0.342964	0.223368	1.38199	1.4146	1.24873	2.18429	1.68567	AT3G12820	0.0205948	0.0209477	0.0633721	0	0.0721504	0.061754	0	0.2374	0.19316
EPlOSAG00000048854	1.93731	0.407734	0.157671	1.04056	0.238457	0.542433	0.210851	0	AT2G18460	0.0273342	0	0	0	0.0319202	0	0	0	0
OS07G0123900	13.0746	10.2769	12.0656	6.87926	6.7394	5.82739	6.02889	7.6417	AT2G41820	2.62189	2.23481	2.27038	4.45733	4.23498	4.91464	5.13868	5.98542	5.74554
OS06G0146600	0.231156	0	0.275925	0	0	0	0	0	AT2G22910	2.73939	2.36309	2.29999	3.32867	3.61742	2.92288	4.09722	4.3112	5.8059
OS12G0433066	1.09848	1.38714	1.68912	0.941505	1.1392	0.549692	0.885217	0.656221	AT1G69200	8.36791	7.0878	6.90821	24.1313	21.6036	19.8603	29.9618	35.1336	36.0968
OS01G0181033	0.734872	0.198854	0.666442	2.45285	2.09334	1.32274	0.685555	0.884285	AT1G56550	0.075047	0	0.0153951	0.0908077	0.0175276	0.015002	0.0176174	0	0
OS10G0501500	292.092	383.871	344.202	99.9711	109.166	87.7758	85.8259	95.2399	AT4G20350	0.611292	0.697132	0.931	0.73967	0.757115	0.592476	0.478338	0.732101	0.463301
EPlOSAG00000043750	0	0.136293	0	0	0	0	0	0	AT1G25277	0.656688	0.33397	0.140326	0.231758	0.543195	0.601667	1.34888	0.540697	0.969492
OS12G0154600	18.8479	18.7478	16.6979	20.4974	20.6191	12.929	15.129	12.9374	AT1G25275	10.4963	9.5752	6.86336	23.4169	17.0837	10.065	40.0789	42.5636	52.9147
OS02G0643200	2.81322	2.4746	1.78471	3.97129	4.84779	1.03005	1.14622	0.472578	AT1G15480	0.898641	0.774395	1.08816	1.73676	1.69072	1.62175	4.36564	4.06953	4.48736
OS07G0679400	0.149	0.117597	0.0181899	0	0	0.0625783	0	0	AT1G10500	22.5515	23.0669	19.227	21.7609	20.4087	24.3157	20.96	23.478	24.0302
OS07G0572600	31.6672	42.2044	33.2563	53.1043	60.7616	23.6443	26.1168	24.0768	AT2G23060	0.0356014	0.0181057	0	0	0	0.0355838	0	0.0439697	0
OS02G0754500	1.08617	1.05013	1.03594	1.31265	1.40378	0.997895	1.09719	0.397095	AT3G63095	0.0357196	0.108995	0	0	0	0	0	0	0
OS09G0559200	0.0129721	0.0163809	0	0.0209026	0.0383206	0	0.0338843	0.0242815	AT3G01700	0.107159	0.0726633	0	0.129663	0	0.035702	0	0.0882313	0.0372241
EPlOSAG00000046700	0	0	0	0	0	0	0	0.190269	AT3G04550	16.62	15.5712	16.9744	21.5683	23.5468	22.6509	32.8597	42.556	49.486
OS12G0133400	3.76597	3.55027	4.62716	1.2584	1.92252	1.45776	1.51863	1.26692	AT3G01705	0	0	0	0	0	0	0	0	0.778604
OS02G0653800	120.506	108.18	109.294	85.3853	76.3726	55.069	51.859	42.6345	AT2G39510	0	0.01712	0.0172641	0	0.039311	0.0336465	0	0.0138586	0
EPlOSAG00000000197	0	0	0.605255	0.998603	0.915368	1.04112	0	2.32006	AT1G29395	0.184405	0.37513	0.432329	0.286885	0.369161	0.605605	9.02892	11.0405	12.2167
EPlOSAG00000000191	0.548904	0	0	0	0.405377	0	0	0	AT4G00200	0.0683702	0.25035	0.0701271	0.34746	0.159682	0.451021	0.770399	0.889445	0.783749
OS03G0127900	21.1648	23.8356	24.2979	41.4046	51.8343	39.7787	47.2135	46.1499	AT1G29390	6.25367	5.84619	5.48023	5.99973	5.71941	6.87767	18.8377	21.6128	23.7483
OS04G0419900	0.699289	0.949517	1.91668	3.22289	2.83209	3.04431	4.51742	5.05283	AT3G11325	0	0	0	0	0.0204755	0	0	0	0
OS12G0161100	0.174519	0.238745	0.269867	0.0468686	0.042962	0.0732962	0.0759768	0.10889	AT5G20190	16.9904	17.0232	15.5599	22.5223	18.7534	13.1174	14.2447	15.9066	18.7649
OS04G0578300	1.36746	1.81173	1.18226	1.44489	1.42379	0.828524	0.819787	0.88119	AT2G39518	0.456362	0.348136	0.438833	0.448665	0.49962	0.19956	0.167393	0.140908	0.029724
OS04G0534100	2.12307	2.92172	2.21736	4.67771	4.51821	4.0762	3.44058	4.94726	AT1G61770	6.01559	5.72459	5.68911	11.5229	9.33473	7.31706	8.92777	9.73822	9.05282
OS05G0394900	6.77334	6.9398	6.67526	3.54712	4.3656	4.60329	6.85588	9.3072	AT2G43090	28.7801	27.284	24.2943	35.9052	34.4545	36.1263	34.4609	40.0776	42.9252
OS03G0147150	0.183342	0.18191	0.0895298	0.253224	0.386863	0.132003	0.4447	0.294159	AT5G02870	80.5278	72.7057	67.5764	148.866	133.618	133.556	108.5	123.94	129.415
OS01G0833600	0.246619	0.0311427	0.0240859	0.437129	0.692108	3.68736	3.83295	4.06234	AT5G38460	1.71294	1.21096	1.4579	2.32258	1.73078	2.5985	3.49355	3.33091	3.00047
EPlOSAG00000005013	4.41349	7.21248	4.31039	0.418334	0.383465	0.436146	0.339072	0	AT3G48600	0.949999	0.483138	0.822159	0.754365	0.485356	1.12757	1.39383	1.7844	1.98002
EPlOSAG00000005010	10.8204	15.3369	14.0183	14.233	17.6129	8.90338	12.6899	8.26688	AT1G66920	0.459272	0.622855	0.458995	0.313485	0.371303	0.435505	0.262625	0.407239	0.343622
EPlOSAG00000029572	0	0	0	0	0.213357	0	0	0.270383	AT4G14110	4.98991	5.23015	4.02585	8.13637	9.45126	8.3327	9.35681	10.3465	10.1465
EPlOSAG00000029573	0	0	0	0	0.210196	0	0.185862	0	AT4G37370	0.0601047	0.0611346	0.0770614	0.890909	0.193019	0.0450563	0.123459	0.148465	0.219227
EPlOSAG00000029570	0	0	0	0.372972	0	0	0	0	AT2G26740	13.2228	12.4916	11.8522	19.7029	24.4449	26.06	11.836	13.2456	13.1869
OS08G0540350	0.142308	0	0.138984	0	0	0	0	0	AT1G07060	0.0202995	0.061942	0.0416423	0.0491252	0.0474105	0.0202895	0.21444	0.300852	0.2327
OS01G0119800	0.425154	0.268439	0.233563	0.27831	0.372857	0.2232	0.0173522	0.0497385	AT4G28210	8.99318	8.97905	8.9274	16.8106	14.6787	15.1259	16.7437	19.6608	17.8391
OS04G0667400	0.133904	0.19579	0.206488	0.0681365	0.208191	0.224953	0.368178	0.408947	AT3G21160	2.89115	2.6281	2.25327	4.28338	4.16046	3.76575	5.19714	5.22021	5.38531
EPlOSAG00000010053	0	0.577623	0.446736	0.737064	0	0	0	0	AT1G73830	5.72222	5.1572	4.8539	3.50579	8.57134	6.12965	1.10524	1.51086	1.61033
OS04G0471700	0.469767	0.485357	0.411127	2.15291	2.53216	2.07034	1.09162	0.947843	AT5G34850	26.8656	24.4345	20.3145	28.7025	25.9739	24.0526	26.608	26.7759	29.7768
OS03G0123100	124.503	94.8869	117.057	99.3457	82.9576	93.5968	90.6872	73.7199	AT3G08660	0.0465545	0.0355141	0.0477508	0.0985799	0.0679564	0.0697973	0.0546435	0.0383316	0.0242577
OS03G0694600	0.372275	0.470103	0.407649	0.581688	0.649842	0.284276	0.324139	0.570138	AT4G09060	0.172662	0.195134	0.196776	0.766049	0.918536	0.709481	2.27432	2.96966	2.55906
OS02G0166200	0	0	0.0250394	1.36331	2.37312	2.75656	5.10086	2.78345	AT3G59580	0.900564	1.12537	1.10845	0.747217	0.78123	1.27731	0.58389	0.48727	0.545221
OS12G0165900	2.00652	3.83571	2.77708	4.86768	4.20816	3.02634	3.76442	2.69759	AT5G62360	0.0557447	0.19845	0.142943	0.168629	0	0.0278586	7.65539	13.9532	17.0212
OS12G0552550	0.7502	0.370699	1.05123	0.946045	0.192709	0.876734	0.511198	0.366325	AT4G33540	3.8509	4.3857	4.02611	4.60566	5.29568	3.56665	4.69453	5.2274	5.65553
EPlOSAG00000015882	0	0.466541	0	0	0	0	0	0	AT5G48810	24.8045	24.8863	20.492	35.8123	32.2371	30.088	40.0868	48.8769	49.307
EPlOSAG00000015885	1.06731	0.673893	6.77549	0	0	0	0	0.998915	AT4G35070	0.274808	0.628913	0.387571	1.45478	1.16331	0.75535	1.27007	1.44246	1.6288
EPlOSAG00000015886	0.972742	1.53545	2.13754	7.44528	3.95115	4.08541	3.49373	3.64161	AT5G45770	0.0169269	0	0.0347237	0	0	0	0	0.0139371	0
EPlOSAG00000015888	0.900546	0	0.29317	2.41849	0	1.51288	0.392052	3.37134	AT1G74460	0.276148	0.131077	0.0944148	0.0222762	0	0.0184008	0.0432174	0.0303163	0
OS08G0533450	0.160692	0	0.0871882	0.172621	0.184605	0.0599903	0	0.0668419	AT4G23060	0.739475	1.01986	1.40125	1.75921	3.45416	4.09643	3.76608	5.04633	4.49312
OS08G0174900	0.808795	0.867434	0.703338	2.30301	1.65284	1.52626	1.46149	0.6429	AT1G52230	707.862	689.983	628.197	709	720.091	887.541	704.8	828.679	806.394
OS03G0856100	6.50562	9.50325	7.0204	18.5067	14.1052	10.9696	8.28685	8.43398	AT2G06025	6.7785	7.46263	7.04814	8.7839	9.58224	10.4651	14.9112	16.1051	16.4073
OS07G0534100	0.0545011	0.0172058	0.13307	0	0.0402502	0.801147	0.231338	0.102017	AT2G37160	2.2786	2.05277	2.16545	2.62209	2.67176	2.96538	4.63948	5.09237	4.79762
EPlOSAG00000004769	0	0.25537	0.197504	0	0.298699	0	0	0.378536	AT3G44110	33.4412	30.2004	26.3533	109.422	109.788	63.1709	39.4304	45.7845	48.9655
OS08G0104900	30.9388	23.4084	27.9106	10.2897	13.3848	12.6467	11.3096	11.3625	AT3G06950	5.85001	4.00411	4.51153	7.69063	8.50084	10.0896	11.7453	13.9975	11.6886
OS01G0731800	0.787708	0.933959	0.974848	2.36414	2.07827	1.95972	1.64134	1.24935	AT1G16680	2.40408	2.03447	2.1305	4.30526	3.90793	4.12337	5.77905	5.71664	5.94266
OS02G0288200	7.82988	7.15874	6.5448	11.2775	11.3971	8.59779	7.66679	7.00878	AT5G46330	0.303776	0.514969	0.947729	1.40137	0.901636	1.01209	4.31585	4.41358	4.24733
OS02G0198800	0	0	0	0	0	0	0	0.026403	AT3G06955	0	0	0	0.160322	0	0.132431	0	0.654563	0.138077
OS11G0644800	47.6536	49.917	52.9948	16.3694	21.2168	24.705	22.8443	34.1718	AT1G12900	641.565	614.762	557.544	545.202	505.815	592.57	355.278	348.324	367.004
OS03G0824000	8.76263	11.0235	9.30071	18.0625	14.7499	11.61	13.0423	12.0695	AT2G27290	25.6308	24.5195	18.763	23.1976	22.3879	25.1275	24.4132	26.0604	27.949
OS05G0514350	2.03837	3.15318	2.93637	20.282	17.5377	15.8378	21.4308	15.3573	AT3G13840	0	0.0156419	0	0.0372161	0.12571	0.0461125	0.234656	0.265905	0.240392
EPlOSAG00000001648	0	0	0.318015	0	0	0	0	0	AT1G78110	0.993842	0.754142	0.485419	0.668089	0.847411	0.88298	0.574006	0.7014	1.18366
OS11G0591300	0.276711	0.399344	0.489019	1.08285	0.875815	0.774772	0.58512	0.27131	AT3G13845	2.71586	3.29491	2.04728	3.99889	3.74468	3.63027	3.30298	3.82572	4.70572
OS07G0558900	1.53013	2.00379	10.7375	3.01348	4.93867	3.04659	2.14646	3.71278	AT4G17170	10.2431	11.1982	13.1031	10.8204	13.7247	9.91303	10.9596	10.6332	13.0709
OS06G0307900	0.893415	0.60062	0.615177	1.53282	1.62341	1.60888	1.3935	1.52795	AT1G80660	0.0153565	0.0078098	0.0157511	0.00929074	0.0358658	0.0153489	0.0540742	0.0442542	0.00800164
OS06G0176500	0	0.0289847	0.0224168	0	0	0	0	0	AT5G18840	0	0.0723749	0.0729841	0.0172198	0	0.0711206	0	0	0
OS01G0510600	15.9829	15.3309	13.8831	46.1878	33.7712	22.6537	18.4321	18.377	AT1G12740	0.0771789	0.0261671	0	0.0311291	0.0600851	0.0257136	0.0754909	0.0317734	0.0536198
OS01G0224100	1.89366	1.2424	1.17785	2.50585	2.20324	0.853078	0.95336	0.475255	AT3G02260	11.5496	11.5168	12.4554	17.2595	16.3183	15.4573	23.6046	24.3528	20.4845
OS06G0222400	11.1605	13.4973	11.5777	7.15761	8.52933	4.19759	3.69843	6.96353	AT4G32830	0.516562	0.833414	0.639457	3.49163	2.30891	2.56373	7.94484	9.35708	8.40892
EPlOSAG00000006338	0	0	0	0.80407	0	2.09576	1.62931	0	AT2G41650	3.49524	2.44129	3.0773	10.5641	12.823	9.95577	6.16264	8.67068	11.2713
OS11G0483900	3.08545	2.97063	3.22981	18.6509	17.6503	12.4861	13.8036	13.8483	AT5G61980	0.494187	0.473087	0.633607	0.826607	0.933543	0.711859	0.597115	0.759943	0.825518
EPlOSAG00000006333	0	0	0	0	0	0	0.313642	0	AT4G35410	2.33031	2.14178	2.3038	3.46517	2.62292	2.35722	3.3943	4.13794	4.97396
OS05G0552700	1.55159	1.15654	0.841857	1.40633	1.2732	1.3033	0.717699	0.786582	AT4G27850	0.0463739	0.0157228	0.0634207	0	0.0180514	0.046351	0	0	0
OS04G0131500	0	0	0	0	0	0.0130062	0	0	AT3G11930	16.6908	13.3247	7.34341	7.58341	9.83452	8.28693	2.70749	5.12441	8.50417
OS10G0150800	35.0488	25.515	33.5023	498.709	551.75	232.531	236.259	186.392	AT4G27852	0.117839	0.134841	0.105759	0.285174	0.292421	0.176672	1.10652	1.10366	0.90567
EPlOSAG00000044709	2.08822	3.16437	0.815778	14.8054	24.6751	11.226	7.09103	13.2899	AT3G17030	0.517026	0.47914	0.612805	0.987069	1.22096	1.02206	1.67224	1.99608	1.7122
OS07G0187000	0.379355	0.364986	0.361673	0.0145542	0.0133411	0.0303477	0.0471863	0	AT2G34940	0.0765202	0	0.104649	0.0771585	0.148931	0.165712	0.134724	0.105007	0.0797432
OS11G0207000	16.2182	20.5679	19.6273	26.2079	29.2183	27.028	28.3291	31.4853	AT1G03165	2.83125	4.43963	3.146	3.99681	3.1685	2.94776	4.29245	7.09062	6.26981
OS05G0134300	9.95369	12.19	9.52815	9.96219	9.93758	6.69403	6.35027	7.90253	AT1G03160	10.2127	10.4879	11.3841	12.7583	11.7276	14.2156	24.0691	25.8088	24.3919
OS01G0845000	0.228339	0.249024	0.364918	0.100346	0.0613213	0.0348728	0.0677778	0.135995	AT3G46720	0	0	0	0	0.0339929	0	0	0.0359514	0
OS01G0141000	72.6862	72.4591	96.6351	67.9407	53.389	49.5877	52.7915	56.7278	AT4G22517	0.086764	0.66188	0.756445	0.419941	0	0	0.560118	1.25018	0
OS06G0106800	25.5773	34.9736	39.4418	84.9837	65.1378	62.6036	61.8083	60.2995	AT2G16586	3.83902	4.89305	5.39607	5.87826	6.11585	5.87412	10.0413	7.98039	5.03794
OS02G0583000	0.0209734	0	0	10.4766	17.8747	5.46134	5.50585	4.71104	AT5G56100	5.44856	6.68549	6.68262	3.27896	6.09337	6.45437	6.22608	5.9341	7.09005
OS02G0110700	8.18089	12.6208	9.94589	8.65438	10.7442	10.4793	9.79967	11.3031	AT2G16580	0.172785	0.117164	0.147687	0.348452	0.369919	0.316616	0.236608	0.213399	0.240083
OS04G0165700	83.4468	65.849	64.6829	32.5099	39.549	56.5652	54.2742	63.9027	AT4G16360	8.84323	8.67004	8.13723	11.1833	10.4574	9.79616	11.1105	12.6042	10.4633
OS07G0532500	0.064577	0.0101933	0.0473014	2.93958	3.6484	4.54288	5.28183	5.31859	AT2G46920	1.83305	1.91645	1.75281	2.30637	2.36232	2.2774	4.32881	4.22116	3.77484
OS10G0507000	2.00235	2.41167	2.41572	3.3485	3.9517	3.15186	3.27445	3.47247	AT1G23220	7.21622	6.61195	5.78063	7.50494	8.63586	9.56722	7.00007	9.52624	9.91295
OS01G0191900	1.23491	1.33665	0.861473	4.71883	5.47204	7.40927	7.0735	7.13275	AT2G24735	0	0.0925811	0.0466802	0	0	0.0454883	0.0534185	0.0374722	0
OS11G0564800	1.21318	1.69481	1.60269	0.292757	0.683873	0.157534	0.264079	0.2962	AT2G38210	4.86021	2.69645	3.42726	9.55647	9.54538	4.63701	1.45859	1.36423	1.81301
OS02G0577900	1.10151	1.1455	0.822656	2.81899	1.38772	0.380984	0.423125	0.970278	AT5G66090	10.0225	9.40165	8.81934	15.151	14.0888	13.9386	14.2555	15.8186	16.073
OS01G0966700	1.18198	1.46962	0.967892	5.78698	5.78809	11.9598	13.0147	17.8528	AT5G55570	3.6307	2.56243	2.432	2.45062	2.97078	2.41928	0.840715	0.52874	0.669213
OS06G0140100	13.6162	11.7703	11.4718	9.60481	9.04161	10.0629	9.97929	8.99707	AT5G09690	0.293287	0.360461	0.451235	0.192227	0.342493	0.317571	0.846273	0.845193	0.496665
OS06G0306500	0	0	0	0	0	0	0.0210674	0.0301939	AT5G09695	0	0	0	0.102023	0	0	0.0989665	0	0
OS05G0480200	0.224961	0.312484	0.109853	0.579985	0.830691	0.377925	0.381952	0.631632	AT1G48080	0	0	0.377918	0	0	0	0	0	0
OS11G0526900	4.50393	5.24592	4.49435	5.92764	4.85508	4.98162	5.80928	5.04003	AT1G63400	0.547963	0.640363	0.562044	0.747685	0.490135	0.745795	1.04003	1.25754	0.996289
OS02G0246900	11.2507	10.2749	6.37693	12.585	15.4679	8.14252	8.88856	9.0725	AT1G33770	0.0506373	0.10301	0.138503	0.0612717	0.039422	0.151837	0.0495298	0.12508	0.0879502
EPlOSAG00000015413	60.5584	63.2874	39.5652	47.108	45.0321	9.12113	7.63649	2.34528	AT3G45890	1.40987	1.1126	1.23417	2.7207	2.46961	2.55109	4.39388	4.98361	5.02838
OS04G0283800	0	0	0	0.0212323	0	0.0221363	0.0860471	0.0246646	AT2G33230	0	0	0	0	0	0.0193686	0	0	0.0201943
OS01G0923300	26.5699	25.0256	24.3827	26.8993	28.1009	35.2516	35.5663	37.6542	AT1G06537	0	0	0	0.131763	0	0	0	0	0
OS11G0618850	1.32163	2.00271	1.39636	2.34256	2.59097	1.95788	1.88303	1.93411	AT4G27585	4.28719	3.86324	4.23016	9.11273	9.8226	8.53758	9.47109	10.469	11.3988
EPlOSAG00000021140	0	0	0	0.515945	0	0	0.418189	0	AT1G65330	0	0	0	0	0	0	0.0584635	0.123034	0
EPlOSAG00000021147	0	0	0.250172	0	0	0	0	0	AT1G06530	3.99383	3.5617	4.07704	7.05419	9.21727	4.84321	6.10966	5.18975	8.63971
EPlOSAG00000021149	1.64002	0.887567	1.60171	2.64264	2.76843	3.54235	4.89587	3.06984	AT5G20410	1.12598	1.10233	1.29928	3.23581	2.95851	1.91322	1.78419	1.99326	2.20014
EPlOSAG00000021148	0	0	0.218173	0	0.329958	0	0	0	AT4G39600	0.422906	0.315445	0.33256	0.614065	0.658479	0.676317	0.546027	0.742845	0.763913
OS06G0671600	0	0.0417559	0.0322941	0	0	0	0	0	AT5G14120	11.1908	11.7451	14.4255	25.7227	14.6199	15.0505	20.6792	19.9492	19.8797
OS04G0445025	0	0.0949517	0	0	0	0.37896	0.0491024	0.140747	AT1G32790	7.63013	7.28068	6.72686	12.4902	10.5195	10.2153	11.6067	12.0185	12.5655
EPlOSAG00000017815	0	0	0	0.938081	0	0	1.52069	1.08973	AT5G19110	0.0493218	0.0167223	0.0168631	0	0	0.032865	0	0.0406101	0.0513993
EPlOSAG00000017817	1.74651	5.51367	3.41143	0	0	0	0	0	AT5G10400	8.86295	8.73637	7.82713	21.8212	21.2993	20.1456	29.08	32.5147	40.9034
OS01G0269900	7.76274	7.47525	7.82969	10.2262	10.8758	7.90091	7.05545	7.63065	AT3G23000	23.8742	19.1701	14.8053	26.1107	22.9153	19.4195	7.22854	6.64116	7.56331
OS11G0498600	0.278766	0.0586703	0.0453758	1.57217	1.9215	7.61013	3.64082	3.91352	AT3G03470	0.224608	0.356964	0.532754	0.611501	0.426224	0.294653	3.13067	3.6756	3.26233
OS04G0589800	1.54452	0.239522	0.423422	0.17465	0.280162	1.22908	0.530846	0.355044	AT3G03475	0	0	0	0.0981764	0	0.0810968	0.0476174	0.167014	0.0422771
OS06G0705250	0	0	0.0212852	0.0175591	0.0965732	0.0183067	0.0569287	0.0815903	AT5G01320	0.26961	0.208937	0.0921795	0.0310697	0.104948	0.141155	0	0.0422836	0.0267587
OS01G0612200	139.371	114.38	105.534	148.448	143.326	75.8782	60.0276	41.7955	AT5G60630	0.0712499	0.144942	0.292323	0.215533	0.291214	0.320467	0.25089	0.11733	0.445506
OS10G0493300	50.1396	45.7422	33.9531	103.258	144.848	49.0353	46.6912	41.0366	AT5G43570	0	0.0470873	0	0	0	0	0	0	0
EPlOSAG00000015770	0	0	0	0.619134	0.567528	4.51847	2.50913	4.31531	AT4G30720	4.44792	4.50285	4.69103	14.0439	12.9427	11.789	19.2984	20.8535	21.5513
OS01G0793200	2.39199	1.46244	1.43761	2.28469	2.46195	2.36379	1.9649	0.911686	AT4G00755	5.05486	5.1256	4.48065	5.68224	7.28758	7.84365	10.6394	10.8033	10.4217
OS06G0584200	5.08437	6.93409	4.93014	10.7909	10.8249	6.21091	5.50207	4.52741	AT4G00750	5.62957	6.08085	5.67553	6.38974	6.37741	8.06748	8.69736	8.35925	8.7875
OS02G0537200	3.46511	3.76642	2.89583	4.00034	3.35593	3.58117	3.05908	2.01972	AT4G00752	2.2019	2.25518	2.54079	3.45992	3.73199	3.48463	7.52016	6.98753	6.69272
OS05G0124600	0.0540086	0.0194861	0.0150706	0	0.136754	0	0	0	AT5G62980	2.92161	3.21675	3.02757	6.81523	5.80354	5.29845	9.1918	10.6638	12.367
OS11G0139550	0.064161	0.0578725	0.0716141	0.162464	0.0676918	0.215576	0.0598553	0.120099	AT5G15650	9.07982	8.70103	7.88396	20.0386	18.899	17.1576	21.744	21.6947	23.1141
EPlOSAG00000031591	0	0	0	0	0.179598	0	0.635223	0	AT5G26740	3.15019	2.95957	2.99682	4.61194	4.90027	4.45857	6.16729	5.82114	6.41539
EPlOSAG00000031593	0.167058	0	0	0	0	0	0	0	AT2G04080	0.718188	0.902375	0.736643	0.545264	0.641345	0.872661	1.96695	1.71603	2.08389
EPlOSAG00000031592	3.47445	2.58087	2.79447	5.92788	4.22627	5.49358	3.73701	1.14769	AT4G37510	20.8264	19.6535	19.6938	42.3173	39.1313	39.5196	53.3276	57.0665	54.6897
EPlOSAG00000030460	0	0	0	0.65172	0	0.339734	0	0	AT4G18220	7.12178	6.98009	5.21264	6.7559	7.04492	6.9455	4.86946	4.62562	4.03513
EPlOSAG00000030468	0.165618	0	0	0	0.244624	0.834692	0.216305	0	AT2G25060	1.4409	1.43302	1.70783	10.9647	7.55323	9.7613	28.6388	35.381	29.2977
OS08G0134900	8.92479	8.86208	9.10906	7.23228	6.38038	6.82107	7.65785	7.26017	AT5G57270	3.21323	3.09162	3.25762	4.18828	3.53501	4.04246	5.63547	6.26178	5.83091
OS11G0216300	40.9547	38.8733	40.7927	36.8931	36.0102	74.1813	76.4744	82.7807	AT1G04200	2.47985	2.92803	2.74813	3.6931	3.47306	3.37128	5.0887	5.23309	5.20475
OS01G0920450	22.9151	22.1167	19.3657	2.6108	5.81204	1.03694	1.81383	1.01095	AT3G52748	0.74028	0.439229	0.189826	0.223937	0.21612	0.123319	0.072409	0.203175	0.0642884
OS01G0249200	28.9561	48.6371	39.6928	116.318	91.4382	83.0943	94.7626	94.246	AT3G02870	19.1345	20.1628	19.7118	17.674	17.0815	16.101	10.4826	10.1367	11.7425
OS08G0332100	1.79686	1.05682	1.14188	4.54137	6.05339	4.56933	4.08277	4.14668	AT1G14740	5.31613	4.99515	4.90543	5.76301	5.41184	6.39991	9.18578	10.3571	10.0709
OS03G0320875	0.0580412	0.0732935	0	0	0	0	0.0758046	0	AT3G02875	0.309969	0.343942	0.361289	0.903567	0.888481	0.690045	1.17417	1.54292	1.77664
EPlOSAG00000020231	0	0	0	1.40712	0	0	0	0	AT3G52740	9.19331	7.81649	5.80954	16.8065	10.4033	8.42068	4.61027	4.71043	5.51696
EPlOSAG00000020234	0	0	0	0	0.429946	0	1.14051	1.63459	AT4G06340	0.0225455	0	0	0	0	0	0	0.0371267	0.0234952
EPlOSAG00000020235	0	0.341692	0	0.43601	0	0	0.353399	0	ATMG01310	0	0	0	0	0	0	0	0	0.0681989
OS07G0601100	5.3925	4.87641	4.64695	0.266676	0.672234	0.370708	0.81056	0.722833	AT4G11630	4.03329	3.97656	3.80699	6.25759	7.65732	6.77654	6.53479	8.29204	8.01955
OS03G0292900	0.218483	0.275897	0.10669	0.248038	0.322709	0.875898	0.58367	0.316017	AT2G43720	0.292068	0.216053	0.217872	0.610428	0.775159	0.451156	0.747964	0.546546	0.802431
EPlOSAG00000026690	0	0	0	0	0	0	0.176699	0	AT5G04310	0.30369	0.453045	0.280345	0.195983	0.212785	0.252951	0.261403	0.325064	0.443074
EPlOSAG00000026694	0	0	0	0.343963	0.315294	0	0.557585	0	AT1G08070	0.032655	0.0442861	0.0334941	0.381958	0.30507	0.217593	0.919896	0.896239	1.33853
EPlOSAG00000026699	0	0.186617	0	0	0	0	0	0.553245	AT1G01520	5.89427	4.37586	2.79702	22.1137	12.3027	10.1406	0.437372	0.251026	0.194161
OS10G0578800	0.812217	1.70942	2.22109	5.7673	10.2213	45.9015	50.1119	52.9988	AT4G19350	4.42223	5.11417	4.66013	7.73321	8.70127	7.47776	10.3812	11.9459	13.8255
OS02G0694600	1.88679	2.22107	2.00668	1.00484	0.980126	0.631258	0.762242	1.1972	AT3G16840	3.64969	3.3833	3.9425	9.246	10.1102	7.61902	9.57629	10.7649	11.1214
OS01G0737200	6.58177	5.84041	5.55938	8.59908	5.78038	3.58609	3.02025	1.99783	AT1G54730	2.52253	2.41892	2.68866	3.12584	3.46036	3.17439	5.08335	4.96722	4.79039
EPlOSAG00000009452	0	0	0.652622	0	0	0	0	0	AT3G44440	0.146577	0.0745442	0	0.177359	0.0855844	0	0.0860226	0.241374	0.0763753
EPlOSAG00000009451	0	0	0	0	0	0	0.176699	0	AT5G40900	0	0	0	0.0315363	0	0.0521	0.0305914	0	0
EPlOSAG00000009450	0	0.275684	0	0	0.644919	0	1.14051	0	AT3G44444	0	0.434249	0	0	0	0	0	0	0.148305
OS01G0102900	31.0863	36.2414	30.5904	55.7885	71.2022	111.972	95.4779	164.361	AT2G22230	12.6867	12.5096	9.94418	18.6022	16.2061	15.5044	17.297	18.36	17.4645
OS02G0770100	3.77238	3.28096	4.5301	2.77765	2.15252	2.74203	3.12146	2.82138	AT4G31820	2.08864	1.95631	1.80324	3.08182	2.52679	2.41051	3.91542	4.6581	5.19881
OS12G0556701	0.0466019	0	0	0	0	0	0	0	AT5G18150	3.25037	2.64485	2.08369	4.08047	3.41613	3.61426	3.19518	3.11115	3.38728
OS05G0446900	1.34008	1.06494	1.20723	5.26803	5.97219	13.2748	10.6069	7.91443	AT5G05950	1.39306	0.806562	0.945246	1.47816	1.47662	1.30669	1.73574	2.54106	2.83647
OS05G0571700	12.4799	12.398	13.1679	14.0797	12.3221	14.9222	13.8808	13.4853	AT1G76920	3.26582	3.6665	3.34975	4.26856	3.84973	3.9263	3.92369	5.1116	3.64419
OS08G0384000	18.2732	19.0462	19.3128	12.1517	12.1973	7.30912	6.64051	5.74864	AT5G52170	0.265287	0.220271	0.133275	0.248939	0.404631	0.259745	0.190642	0.356619	0.349807
OS06G0257450	9.8153	8.33864	7.42332	12.1994	8.58954	12.9535	10.357	4.53713	AT3G02700	3.0853	3.94801	2.78177	5.96115	6.04363	6.16756	11.2438	12.333	13.1981
OS12G0205500	3.5081	3.76145	5.22645	3.07306	2.9865	2.34667	2.09094	2.24457	AT5G23520	1.66793	1.96938	1.84239	3.14728	2.86036	2.82126	3.35417	3.42851	3.74378
OS10G0580300	19.1998	19.498	21.1256	19.5486	19.7584	20.8591	21.1882	24.9063	AT1G76380	1.79474	1.96117	1.65428	4.26994	4.47493	3.63619	4.71135	5.66132	5.32034
OS02G0483800	0	0	0	0.101965	0.22432	0.744148	0.479347	1.01866	AT1G10240	1.42412	1.4968	1.36333	2.49289	2.41697	2.59062	3.54372	3.86168	3.42333
OS07G0470400	4.63237	4.38726	3.9354	4.14119	4.75674	2.87834	2.42418	2.61318	AT5G26170	0	0.0252844	0	0.030079	0	0	0	0	0.0259055
OS10G0415600	35.5654	29.4508	34.4762	26.2378	27.5078	33.1244	37.2184	34.7061	AT3G55910	0	0	0.0776034	0.0457742	0.0883529	0.189055	0.222013	0.0934433	0.275961
OS03G0778100	119.296	117.257	118.495	551.937	541.927	597.888	631.19	363.306	ATMG00680	0	0	0.224293	0.0881991	0	0	0	0.120033	0
OS12G0417000	7.7939	8.79414	6.54496	8.51351	10.0691	7.69371	7.16111	5.50523	AT4G16960	0.387512	0.304572	0.352303	0.54349	0.287971	0.25528	0.568555	0.609125	0.504792
OS11G0212100	0.0598494	0	0	0	0	0	0	0	AT1G61360	0.659354	0.441649	0.263921	0.71026	0.535228	0.442032	0.887177	0.999717	1.06421
OS06G0221200	117.913	108.465	86.2031	54.9043	46.8032	22.3792	18.6804	17.3868	AT1G56260	0.778209	0.841015	1.14742	1.97156	2.07314	1.84734	2.05521	1.702	2.30624
OS05G0152400	7.81447	9.40081	7.16286	5.91942	6.98865	4.69947	4.38251	4.31288	AT3G16360	1.00361	1.39997	0.764699	0.589843	1.13851	0.859816	0.0673141	0.212489	0.627531
OS10G0569000	26.51	20.8458	23.3494	28.336	24.8631	20.4236	19.3562	24.4306	AT3G48140	117.026	109.034	91.3534	125.759	125.886	107.322	75.8021	90.0743	99.879
OS10G0398600	3.39876	5.45581	5.79484	0.11603	0.446705	0.266134	0.338564	0.296529	AT2G26000	1.2245	1.15959	0.963631	1.63494	1.83674	1.7831	2.45327	2.61616	2.42015
OS01G0242333	0.0499653	0.0630953	0	0.0805115	0.0738008	0	0	0	AT5G22690	0.656882	0.761533	0.862125	1.30763	1.12177	1.02367	1.50058	1.47718	1.39854
OS04G0488200	1.03436	1.17171	0.772502	1.71573	2.53882	1.30326	1.90718	1.48058	AT1G73350	3.64333	4.06438	3.78861	7.37453	6.56815	7.73616	7.8236	7.92116	9.32575
OS06G0717200	1.11583	2.32799	1.70572	3.9673	2.51697	2.58769	2.7404	1.89567	AT1G76650	0.406297	0.771416	0.611214	0.393299	0.442832	0.649754	0.794821	0.535252	0.677456
OS05G0573700	34.1193	34.9079	30.59	51.2897	37.0454	50.039	38.8251	33.6356	AT5G15380	0	0.0138661	0	0	0	0	0	0.0224491	0
OS04G0631800	24.3854	20.9143	29.7121	3.81755	3.35764	3.33535	4.06782	3.43998	AT2G08655	0.606696	0.69937	0.8712	1.66398	1.55867	1.53621	3.32319	2.864	2.14965
EPlOSAG00000017624	0	0	0	0	0.788234	0	0	0	AT4G38260	1.46851	1.91294	2.06117	2.08865	2.46703	2.3948	2.17726	2.18491	3.22181
OS01G0811300	3.56891	3.56059	3.85785	3.16663	2.7959	3.66583	3.57099	3.74004	AT5G62910	1.6601	1.75349	1.96472	3.14831	2.72153	2.13792	5.33978	5.54637	5.70575
OS05G0539600	4.80143	6.45098	4.89116	3.4354	3.49798	3.42293	2.6148	3.78071	AT2G08650	0.516695	0.350366	0.353315	0.625206	0.670426	0.229529	0.0673859	0	0
OS07G0635700	0.973198	0.788948	0.551505	6.71793	10.7011	4.96535	4.4565	2.83369	AT4G32630	0.0105893	0	0	0.0256263	0.0123659	0.0105841	0.0745755	0.00871892	0.0220707
OS03G0210100	0	0	0.0530025	0	0	0	0	0.101585	AT2G37440	0.031532	0.0213816	0.0323423	0	0	0	0	0	0
EPlOSAG00000031278	0.850073	0.429383	0.332087	1.91767	1.00447	0	0	0	ATCG00460	29.1075	26.983	32.123	44.137	58.5163	36.0903	47.1392	35.191	40.7007
EPlOSAG00000031274	0.863445	1.09034	1.26491	0	0.318836	0	0	0	AT5G42220	3.66474	3.51796	4.9515	5.80565	7.81155	4.87656	7.5406	7.10128	7.56151
EPlOSAG00000031275	0.164202	0	0	0	0	0	0	0	AT5G07800	0.264763	0.126729	0.239618	0.263831	0.436495	0.482566	0.43873	0.820699	0.941357
OS08G0500600	0.290271	0.162911	0.188994	0.242526	0.206432	0.162548	0.112328	0.100618	AT5G20225	0	0	0	0	0.0199046	0	0.0200065	0	0
OS04G0482300	34.8033	41.3437	39.1185	6.11171	7.59138	4.96056	4.67941	6.33652	AT2G23180	3.17398	2.28865	1.81882	3.85858	3.68909	2.88943	2.18631	2.17166	2.3604
EPlOSAG00000038747	0	0	0	0.429954	0	0	0	0	AT3G54460	9.26208	9.37711	10.0726	5.34384	7.44229	9.02455	11.3394	11.3584	10.2722
OS03G0833900	15.0724	11.0736	10.7392	9.7918	8.00932	12.1955	13.3919	8.94902	AT2G28370	6.19143	5.3392	5.08503	7.35598	6.4967	6.90588	8.29412	9.51228	8.83673
EPlOSAG00000038740	0	0	0.119509	0	0	0	0	0.229051	AT1G52550	2.45897	2.00706	1.86826	2.60804	2.69427	2.88255	1.1046	1.82468	2.15127
EPlOSAG00000028970	0	0	0	0.219551	0	0.457798	0.177953	0	AT3G21510	0.28076	0.247495	0.0767933	0.113241	0.174861	0.0561244	0.0659088	0.0462339	0.0195057
OS02G0234400	0.270777	0.273547	0.132226	0.196343	0.739907	0.955279	1.48532	1.74863	AT4G35850	3.38149	2.6348	2.83199	7.11345	8.67655	8.04647	11.6522	12.4396	13.3198
OS04G0162800	0.017009	0.107393	0.00830584	0.0822223	0	0.0142872	0	0.0477569	AT1G20560	4.05794	4.32591	4.73585	4.40654	5.01215	5.12192	7.92311	8.23516	8.30862
OS11G0605600	0	0	0	0.039536	0	0	0	0	AT3G57180	3.43441	3.55454	3.67098	6.79489	7.66943	6.92566	8.03402	8.75126	10.3102
OS10G0125700	1.62152	1.07861	2.41785	0.213444	0.2024	0.176491	0.220727	0.0427496	AT1G47990	0.0437347	0	0.0224293	0	0	0	0	0	0
OS08G0154225	0.397556	0.569869	0.839503	0.813738	1.09506	0.667878	1.68398	1.85034	AT2G26330	5.08914	5.79421	4.93607	11.6706	9.9864	12.7773	29.6452	32.8606	29.8445
OS02G0783050	0	0	0.0744559	0.460665	0.112605	0.0320186	0.0995688	0	AT3G61730	0	0	0	0.0301347	0.0872485	0.0248922	0	0	0.0519069
OS05G0150000	26.0539	20.8352	21.8131	24.7653	17.299	17.3973	16.9065	18.8074	AT3G07960	0.581506	0.300149	0.391698	0.798146	0.902047	0.815443	0.81498	0.850397	0.804984
OS05G0347000	21.8928	18.2884	20.1856	19.4245	16.8699	15.7472	16.9573	17.6248	AT1G15030	12.9167	10.6091	10.0728	13.7561	12.0525	13.5356	10.0217	10.3649	10.2667
OS06G0111400	20.0496	19.5441	19.9661	11.0968	14.3357	12.744	11.7992	12.0389	AT1G11592	0.566867	0.656108	0.862125	1.37183	0.913066	1.26994	3.05149	2.67169	2.24075
OS02G0468800	0.833025	0.942355	0.824867	1.01604	1.11933	0.991276	1.01242	0.649701	AT5G53220	0.561097	0.437141	0.648985	0.75116	1.01771	0.799468	1.42928	1.26802	1.48049
OS01G0965900	88.6764	79.9749	98.6392	30.1332	34.1076	35.3274	37.4021	37.0238	AT5G58230	4.41664	4.07169	3.51213	9.26725	8.86651	8.25025	8.91191	10.501	11.4291
OS04G0674000	77.1419	90.8957	116.135	17.5406	17.1173	26.8878	21.6013	29.4058	ENSRNA049495741	0	0	0	0	0	0.323899	0	0	0
OS03G0296600	0.796928	0.071882	0.389156	0.733788	0.50447	1.72132	1.44972	0.905683	AT4G04180	0.259933	0.453234	0.457049	0.898632	0.852811	1.03922	1.42379	1.6714	1.87037
OS11G0682600	0.147234	0.263893	0.403553	0.00765307	0.0561215	0.00797893	0.0124061	0.00889022	AT5G66350	0.268143	0.304208	0.306768	0.249582	0.156566	0.237087	0.242104	0.390613	0.386913
OS01G0559500	9.87572	9.12969	8.84129	17.9381	14.979	15.4164	13.3027	16.2164	AT1G04977	0.0421581	0.0428804	0.0432414	0.153035	0.0492311	0.0421373	0.0494832	0.0347117	0.219669
OS03G0356652	34.1355	32.7922	34.9334	40.8568	39.5899	36.3286	32.946	29.3247	AT5G19400	6.36996	6.17603	6.42497	10.7043	9.24035	9.17298	13.1193	14.4315	13.1523
OS02G0540000	0.196565	0.0391925	0.080831	0.0166703	0.168089	0.0521402	0.0270235	0	AT1G04970	4.134	3.52155	3.74995	4.79897	4.42026	5.43611	7.32395	7.73304	6.79876
OS01G0106700	5.67896	7.29688	5.68944	9.76647	11.1016	7.9357	8.55518	9.19475	AT1G04973	0	0	0	0	0	0	0	0.0305042	0
OS02G0832500	70.8197	73.6825	68.5114	63.2322	62.4677	50.4746	57.4904	56.7687	AT3G05470	0.164723	0.19148	0.185046	1.50911	1.26407	1.00353	3.3605	3.5134	3.95637
OS03G0788500	27.7291	25.8138	27.6004	12.2701	12.742	8.36527	6.79814	7.52195	AT5G63510	11.1806	11.6489	9.44412	17.535	14.9102	16.4566	21.2687	23.1357	24.3429
OS05G0513800	4.63378	2.47103	2.30895	6.72818	6.27483	3.94727	3.25874	2.61435	AT1G74385	0.109337	0	0	0	0	0	0	0	0
OS09G0516600	42.2115	40.9099	46.7391	55.6309	50.994	80.315	80.5107	77.7926	AT1G70800	0.0505105	0.308256	0.0518084	0.0611182	0.206447	0.0757284	0.474296	0.166355	0.26319
OS11G0118800	3.97911	5.24459	5.63494	7.09299	6.33648	6.01627	5.91148	4.981	AT1G74380	7.14597	7.22657	7.5969	10.8374	10.5552	9.19882	12.0099	12.8743	12.6355
OS06G0667300	0.429546	0.340344	0.526447	0.135715	0.460293	0.70747	0.814011	1.24547	AT2G45760	0.0904602	0	0.0309282	0	0	0	0	0	0
EPlOSAG00000019529	0	0	0	1.99721	0.457684	0.520561	0	0.580015	AT5G46490	5.1589	4.76293	4.68544	6.01824	5.70519	5.94083	4.35774	3.94272	4.15391
OS05G0431333	0.038526	0.0973001	0.137962	0.020693	0.094841	0.0431481	0.0167723	0.0480761	AT3G56260	1.01979	1.03726	0.732193	5.1209	2.67948	1.96212	2.42388	2.91782	2.73655
OS06G0706000	0.740636	0.623509	0.482224	0	0.1989	0	0	0.0840209	AT5G64300	15.8493	14.7525	13.5416	25.822	21.2164	20.5426	16.9342	18.9849	19.0247
OS09G0240850	0.0579912	0.0418459	0.068773	0.547315	0.587351	0.417526	0.292137	0.271374	AT5G39470	0	0.0533289	0	0	0	0.0524047	0	0.0431697	0
EPlOSAG00000046831	0	0	0	0	0.368525	0	0	0	AT2G27350	6.47453	6.04836	5.73425	8.00093	8.59303	7.94001	9.78235	10.6902	11.0779
OS11G0557500	3.49643	4.36801	4.26388	0.497115	0.469488	0.17276	0.0488396	0.139994	AT5G59540	14.1252	14.4844	12.9079	6.84709	7.09571	9.78632	10.4446	12.7328	12.9645
OS09G0241100	2.6522	2.56712	1.84079	8.65572	7.90443	7.20358	6.32998	3.20045	AT3G55005	1.65454	1.3161	1.87111	4.18368	4.21105	3.66787	6.34892	7.1084	6.60953
OS01G0664500	15.4553	13.2778	14.2398	13.6978	12.2218	18.9822	20.3331	18.524	AT4G05631	85.2038	94.1081	95.4945	152.654	158.757	158.375	242.862	232.709	233.899
OS04G0631100	32.7047	28.5166	20.1897	10.829	10.0034	14.0249	9.84027	11.0364	AT2G32670	0.0398472	0	0.0613067	0.096431	0.139598	0.219051	0.25724	0.131236	0.352967
OS12G0423944	0	0.161734	0	0.206378	0	0.43033	0	0	AT2G36310	3.82578	3.69899	3.53616	4.17159	5.1981	5.37963	5.27595	6.34798	6.91269
OS02G0282301	0.188458	0.0419968	0.0541341	0	0.0163742	0.40972	0.144785	0.249008	AT1G30530	13.7022	12.6178	7.95251	49.1764	57.2383	31.9701	16.3477	16.8997	15.91
OS11G0259700	5.83158	1.62607	6.31694	2.33725	6.05568	0	0.115985	0	AT3G50630	1.04731	0.556838	0.708011	2.47691	2.44605	1.04679	1.45279	1.54826	2.38129
OS01G0326000	4.68344	5.39689	3.96061	27.7664	21.7411	20.4613	18.3504	10.9135	AT3G10870	0.480644	0.391104	0.177478	0.814218	0.808249	0.922382	1.42168	2.0104	2.7048
EPlOSAG00000039289	0	0	0	0	0	0.212334	0	0	AT5G24010	1.58052	1.35076	1.39091	1.86718	1.28871	1.61713	1.74537	2.04828	2.10515
OS07G0232850	0.769932	0.92596	1.39647	0.236311	0.324921	0.492745	0.718263	0.960788	AT1G35160	8.73636	7.94073	6.52045	19.0729	16.6273	16.0521	27.2286	33.3033	32.2138
OS04G0330900	2.93646	3.8115	2.98054	14.8906	12.2257	6.89637	7.63628	11.0628	AT4G15430	2.95287	2.92885	2.59607	7.71193	7.83898	7.76352	1.14097	0.792818	0.449164
OS02G0702633	0	0	0	0.169626	0	0	0	0	AT2G47890	0.170079	0.370701	0.373821	0.455695	0.411416	0.279278	4.39189	5.05138	5.38059
OS02G0736500	23.8236	22.9557	22.4288	18.5435	19.2865	15.4591	14.8116	13.5075	AT1G11620	0	0	0	0	0	0	0	0.0202803	0
OS09G0464000	101.092	94.0706	97.142	26.9189	36.1686	44.5163	46.0773	34.1094	AT2G47895	0.0373567	0.0759937	0.0383167	0.316414	0.261746	0.336045	0.74541	1.13806	0.467162
OS05G0446000	2.13522	1.80425	1.76372	3.00409	3.42055	3.10523	2.85113	2.07792	AT5G01660	0.342514	0.387092	0.31228	0.126636	0.188879	0.180682	0.234516	0.305517	0.1983
OS01G0505700	6.27508	5.0355	3.72843	9.21478	7.64771	5.08918	5.47043	2.48805	AT1G23030	14.5529	14.6329	15.8833	10.1545	9.87784	8.37685	5.92839	6.16945	6.62857
EPlOSAG00000039282	0	0	0.178694	1.76895	0	0	0	0.342485	AT1G03310	9.30372	11.0729	11.2917	7.85069	7.08653	8.72231	15.8365	16.7391	15.6642
OS06G0239000	5.98765	6.28826	4.1581	12.9208	11.3106	9.47771	8.92049	9.18032	AT5G13060	1.69066	1.70846	1.43007	3.22798	2.84608	3.22603	3.74978	3.93206	4.05001
OS01G0581400	0.545011	0.834481	0.525627	2.44799	2.30433	0.698142	0.756299	0.663109	AT2G45490	0.311977	0.294656	0.20571	0.728026	0.676592	0.690465	2.24942	2.77055	2.62416
OS04G0126900	10.7057	10.3708	10.9999	0.89798	1.12639	1.57678	1.45568	0.878435	AT1G31660	5.08601	3.84338	3.85938	13.9095	16.7194	11.904	10.9289	12.6549	13.641
OS03G0264000	10.5438	9.29564	9.4383	12.5078	10.5289	7.67205	6.52206	5.59392	AT4G22740	3.20693	2.99883	3.14786	4.67319	5.47652	4.80803	6.75928	7.21166	6.86369
OS04G0156200	0.105034	0.168808	0.121231	1.01548	1.31163	1.97306	1.37179	2.44863	AT3G53720	1.86699	1.96109	2.39818	5.29933	5.54225	5.01397	3.43044	3.51262	4.06399
OS08G0198300	1.17289	1.0124	1.31949	0.88516	0.701735	0.174593	0.232686	0.305696	AT3G06700	69.1678	57.5732	54.3341	104.321	103.887	99.3936	79.6298	84.8932	98.9594
OS05G0212400	8.43341	7.89936	8.15103	7.69754	9.34532	7.25081	7.1734	8.42114	AT2G31320	1.90211	1.86276	1.68495	3.09096	2.91882	3.26028	4.10543	4.15481	4.30029
OS03G0353300	0	0	0	0.0216027	0	0	0	0	AT1G74650	0.415561	0.451832	0.367448	0.988328	0.786492	0.529938	1.78287	1.52203	1.14986
OS05G0471116	0	0.0367764	0	0.281567	0.200743	0.0163086	0.063394	0.109028	AT1G69030	4.36936	3.90825	3.73846	3.63978	4.33322	4.23554	6.21097	6.34552	6.47544
OS02G0639550	0	0	0	0.187049	0.0857294	0.195014	0	0.217287	AT1G12240	29.1811	30.119	29.1213	35.6278	31.2279	38.7893	29.4506	26.9908	23.9418
OS08G0437300	1.88312	1.15296	2.02491	9.19505	19.1611	10.2896	9.01797	11.714	AT4G00030	12.4082	12.9987	14.7085	16.048	17.4834	13.4047	13.6049	15.2942	14.402
OS08G0448000	4.66208	7.29767	6.83925	7.15228	11.3334	6.33095	9.62807	3.69063	AT1G29160	0.191607	0.121806	0	0.34777	0.699231	0.311208	0.590362	0.690216	1.22302
EPlOSAG00000025683	0	0	0	0	0	0	0	1.07346	AT1G12244	6.15645	4.59209	3.84492	6.72099	7.98816	7.11061	9.12102	8.51598	9.21018
OS04G0497600	8.49306	5.80299	6.10939	9.53706	6.85867	7.88175	7.9029	5.47183	AT1G43825	0	0	0	0	0	0	0	0.102528	0
OS11G0487100	0.627047	0.303252	0.312715	0.0644931	0.137941	0.022413	0.104547	0.149837	AT5G03770	0.428066	0.449915	0.39516	0.966868	0.833142	0.869973	1.05513	1.33934	1.18959
EPlOSAG00000003251	0	0.527395	1.01972	0.336486	0	0	0.545464	0.781759	AT3G50980	0	0	0	0	0	0	0	0.0309735	0
EPlOSAG00000003257	0	0.584582	0.226059	0	0	0	0	0	AT3G12650	3.05189	2.79717	2.82072	7.02041	6.81452	4.96106	3.97581	4.2801	6.08126
EPlOSAG00000003259	7.33928	9.54051	3.79474	26.4349	23.5939	17.7693	13.5324	5.25272	AT4G36530	14.8673	13.8357	12.8132	15.0224	15.2725	17.9121	13.7758	16.5841	17.4382
OS12G0565200	2.93798	4.49262	4.07986	1.47941	1.45781	1.11824	0.749442	0.601497	AT1G75380	12.5912	16.2505	18.6481	5.35161	7.73881	12.8586	71.2065	84.314	101.399
OS09G0550400	0.0152837	0	0	0.0123137	0	0	0.00998064	0	ENSRNA049494848	917.883	1080.51	1132.96	1470.84	1455.39	1711.97	1285.1	738.45	1031.68
OS05G0169701	0.0412267	0	0.0805274	0.398584	0.121787	0	0.107688	0	AT5G60130	0.128605	0.130809	0.0942213	0.0222305	0.0858182	0	0.0862577	0.0605084	0
OS05G0169700	0.220824	0.40085	0.646996	1.24538	1.44736	0.255045	0.666939	0.439178	AT3G20480	0.561038	0.570652	0.59238	0.838595	0.732245	0.395832	1.00715	1.01899	0.842611
EPlOSAG00000043274	0	0	0	0.952513	0	0	0	0.276623	AT5G49800	0.736611	0.51376	0.237455	0.356523	0.589849	0.378642	0.839899	0.987735	1.25015
OS03G0422200	0.0769235	0.0728533	0.131472	0.371852	0.284048	0.0969212	0.125582	0	AT1G79470	0.570827	0.470016	0.641257	1.21696	1.42842	1.4807	1.34002	1.7681	1.8271
OS01G0315800	66.6341	72.554	70.3428	55.3854	60.1811	36.7589	43.4861	44.808	AT5G13880	0.151531	0.205504	0	0.366709	0.530864	0.479613	0.918948	0.831777	1.1054
OS01G0649400	3.90825	2.57665	4.24618	1.79569	3.4775	0.975626	1.12747	0.352558	AT1G35630	0	0	0	0.0307033	0.0592631	0	0	0	0
OS03G0279832	0	0.169178	0	0	0	0	0.0699898	0	AT4G10170	2.40224	1.56628	1.89536	3.08064	3.04504	3.32454	3.30163	3.55013	3.16672
OS04G0571300	26.2241	29.1079	24.4034	11.6294	12.8147	6.79318	5.12523	8.00019	AT4G14815	0	0.0368702	0	0	0	0	0	0	0
OS12G0112000	7.4631	8.87208	8.81201	1.94947	2.71277	0.783606	1.69433	0.79125	AT5G37350	1.99189	2.21959	2.12115	5.52659	5.83742	3.75356	4.42282	4.89929	5.35474
OS09G0482000	0.450841	0.55095	0.355089	2.13252	2.01922	1.9057	2.18433	1.63335	AT5G46130	0	0.0199837	0	0	0	0	0	0	0
OS05G0497300	98.0972	85.2324	99.1704	66.1618	67.8386	42.2259	37.901	45.239	AT5G45380	0.362941	0.249432	0.382328	0.1543	0.366558	0.176479	0.0345408	0.185762	0.17378
OS03G0852900	15.1893	12.125	12.8069	13.1066	10.8523	16.4303	15.1035	13.7225	AT2G23300	0.243614	0.284498	0.379439	0.305694	0.316097	0.144293	0.180039	0.230301	0.131639
OS10G0503800	0.489229	0.760358	1.76419	14.9174	15.286	86.3927	81.7127	108.622	AT5G55690	0	0	0	0	0	0	0	0	0.0291067
OS01G0820800	3.6836	4.34905	3.87542	7.14199	7.1881	7.0436	5.61279	7.06325	AT1G30040	0.146792	0.160793	0.150564	0.792459	0.44833	0.259581	0.477133	0.399782	0.376554
OS02G0666550	0	0	0.0822934	0.27155	1.12012	0.566224	0.330149	0	AT1G50710	2.86857	2.24566	2.71086	4.73849	4.00852	4.59067	7.39604	8.51874	7.84295
OS06G0186600	22.1744	22.0777	24.5199	26.3401	27.6547	27.332	27.0328	29.462	AT1G29980	0.789241	0.891961	1.01511	2.77402	2.51627	2.61699	3.82314	4.74485	4.90879
OS02G0219900	12.2544	10.4578	10.4926	19.3254	18.789	16.2941	18.2947	19.796	ENSRNA049494840	228.058	209.436	338.706	358.547	919.321	349.035	437.209	201.362	266.165
OS06G0220800	18.534	20.0243	19.706	12.5847	12.3115	8.11138	9.69136	9.98915	AT2G20970	0	0	0	0	0	0	0.0301531	0	0
OS01G0838350	2.74452	1.63835	1.1209	11.7394	8.10755	4.946	6.77792	5.5109	AT3G17360	0.33547	0.349247	0.429102	1.84337	1.47484	1.28994	4.44717	5.04339	4.59827
OS01G0654150	0.271418	0.16392	0.345754	0.266212	0.383465	0.218073	0.32366	0.132534	AT3G10320	0.0137369	0	0.0140899	0.0332436	0	0.0274603	0	0.0226211	0
OS06G0648600	0.22871	0.770164	0.843834	1.06465	1.05098	0.426915	0.962498	1.14162	AT2G47560	0.239201	0.3244	0.163565	0.192957	0.217259	0.132824	0.187176	0.175068	0.166184
OS01G0859300	0.246303	0.0777569	0.0300687	0.322465	0.0909501	0.103445	0.0603157	0.0288148	ATMG00350	0	0	0	0	0	0.358448	0	0	0
OS03G0310000	2.13019	1.58036	2.22346	8.17359	5.34885	11.5411	5.59903	2.41733	AT2G34870	0	0	0.038477	0	0	0	0.0880622	0.0617742	0
EPlOSAG00000002121	0	0	0	0	0.76693	0	0	0	AT5G47840	40.6086	38.7026	36.8483	52.9603	51.9903	53.0716	57.2239	61.8696	58.7644
EPlOSAG00000002126	0.231466	0	0	0	0.683769	0	0	0	AT5G66880	1.31605	1.79038	1.68734	2.34885	2.49739	2.56504	18.8456	21.6449	21.9095
EPlOSAG00000002125	1.49701	2.20547	1.46204	4.82442	2.9482	3.35322	1.95517	0.467025	AT5G07760	0	0.0091528	0	0.0217768	0.0105084	0.0179884	0.0844973	0.140775	0.15942
OS01G0210900	0.626582	0.201162	0.497855	0.0342252	0.156862	0.196253	0.138703	0.377699	AT1G25510	0.423269	0.339199	0.920915	2.5608	1.67757	2.12812	2.13781	2.57684	1.77776
OS04G0632200	0.31112	0.0982193	0.265871	0.751984	0.402095	0.392001	0	0.0727954	AT3G28360	0	0	0	0	0	0	0.00832111	0	0
OS12G0278900	1.42308	1.9936	1.60701	1.16446	1.08382	0.989909	1.53917	1.12378	ATMG09740	8.21848	4.93959	7.66333	6.32828	8.72485	5.97413	7.01562	10.1503	7.39673
OS04G0531500	16.2825	17.0108	23.161	8.16509	9.49737	5.21028	5.02236	5.11633	AT1G54870	0	0.0210931	0	0	0	0	0	0	0
OS08G0534400	2.16432	1.68708	1.77452	2.75553	1.65759	4.12973	1.57039	1.80055	AT3G20150	0.378094	0.444248	0.601774	2.57934	2.17719	2.0394	7.33019	8.08873	7.33012
OS10G0183900	11.2749	9.74254	10.2675	14.7083	11.4774	10.099	9.69643	6.6892	AT1G54650	0.849553	1.12334	0.697107	1.06909	1.3294	1.40956	1.57552	2.23839	2.26646
OS12G0116200	6.24576	5.57085	6.22341	6.90474	6.46936	7.14561	6.56711	5.77151	AT3G20155	0	0	0	0	0	0.0304803	0	0	0
OS03G0294600	2.15303	1.46398	2.20228	4.61887	2.63442	3.87383	2.87851	1.43081	AT1G74100	5.43914	5.6134	3.22882	7.06357	6.16556	6.11353	4.53677	5.70876	5.54366
OS02G0822100	46.5629	52.2419	45.4032	61.354	65.4261	51.0242	53.2214	55.082	AT1G49475	0.0787993	0	0	0.0635654	0.0613466	0.183775	0.154152	0.108135	0.273728
OS02G0297600	50.693	51.9137	49.7458	57.6585	57.7175	41.4917	42.81	35.1925	AT1G49470	0.91955	0.956564	0.771692	0.151727	0.439293	0.167109	0.0981206	0.309735	0.261349
EPlOSAG00000033658	0.724968	0	0	0	1.07081	0	0	0	AT3G06540	1.59417	1.55663	1.84443	2.25303	2.368	2.24349	3.53276	3.87477	3.66819
EPlOSAG00000033655	0	0.149754	0	0.191091	0.175163	0	0.154885	0	AT5G47090	1.24952	1.02198	1.10986	1.6678	1.77506	1.53216	2.04118	2.71523	3.04729
OS03G0796950	0.125978	0	0.0410118	0.13533	0.062025	0	0	0	AT1G16270	2.45698	2.76941	2.78061	5.18126	4.79349	5.15948	7.26519	7.90236	6.78278
OS01G0925200	67.1422	57.7513	63.0428	35.7227	34.8256	28.0156	26.6549	32.2172	AT3G61800	0.772898	0.805795	1.01077	1.28592	1.34633	1.37766	2.10922	2.42355	2.49019
OS02G0517366	0.207918	0.315067	0.243674	0	0	0	0	0	AT5G57280	3.12754	2.40857	2.08514	9.56901	8.26977	6.58693	5.37534	6.32745	7.37992
OS09G0413100	14.9146	12.2405	12.6143	12.0365	12.6568	16.4941	14.3239	15.9463	AT2G36190	0	0	0	0.0270761	0.0130655	0	0	0.0276365	0.0582981
OS09G0365000	1.67212	1.68473	1.65623	1.38541	2.03189	2.57003	2.64853	3.77368	AT5G44380	0.895184	0.364209	0.282519	0.599916	0.434232	0.412958	0.0969902	0.215451	0.186578
OS02G0478450	0	0	0	0.0982752	0	0	0	0	AT3G25500	6.74638	7.2528	8.64778	10.1839	8.89647	8.64854	9.96546	10.1422	8.51673
OS09G0455400	25.7878	28.175	30.3234	20.8144	15.333	28.4081	25.03	23.7395	AT5G64950	0.336458	0.301962	0.426305	1.82006	1.06316	1.06822	1.41706	1.40144	1.44377
OS03G0138700	12.3602	9.71281	12.2069	46.4769	65.0943	42.3443	39.3452	37.3715	AT5G61350	1.11252	0.694165	1.11234	0.305432	0.393028	0.439183	0.4938	0.392579	0.379965
OS12G0600400	56.9456	49.4894	57.9655	25.2558	25.5138	21.4801	19.2814	17.8709	AT1G53060	0.291301	0.444439	0.423282	1.38054	1.04887	1.04332	2.67835	2.11867	2.73214
OS01G0788900	0.708526	0.50392	0.69993	0.98421	1.09464	0.902982	0.787095	0.777451	AT1G69540	0.211786	0.330303	0.173783	0.11959	0.115415	0.0987848	0.099434	0.104627	0.0441413
OS09G0395300	1.47391	3.38016	2.82932	18.2082	30.0029	9.10752	8.91694	8.7524	AT5G64790	0.0285681	0.0581152	0	0.0172838	0	0	0.016766	0	0
EPlOSAG00000028655	0.443346	0.186617	0.72165	0.238128	2.83764	1.4896	0.579031	0.276623	AT1G71080	4.02248	4.39307	4.20189	5.06911	5.15193	4.89129	6.85365	7.49395	7.08953
OS01G0880400	6.46654	7.31128	5.36083	12.7825	13.9244	9.25294	11.1953	9.53563	AT1G48780	0.856701	0.617228	0.69565	0.863848	0.833695	1.01683	1.25695	0.9699	1.04158
OS02G0731500	9.81964	12.8201	16.7366	0.867706	1.00592	0.957866	1.05495	3.05357	AT5G19680	4.05697	4.09137	3.3821	6.55923	5.82627	5.02126	6.9098	7.02192	8.32976
OS02G0185400	1.01482	1.36988	1.08226	0.319529	0.310125	0.35273	0.228518	0.0873368	AT2G40480	1.71912	1.17031	1.33289	2.03102	2.05497	2.31359	2.3356	2.94241	2.68025
OS11G0242100	28.0872	27.7323	28.6439	24.268	30.9005	32.9701	35.7333	33.2271	AT5G01420	0.126276	0.0733943	0.0740121	0.305591	0.400255	0.468795	1.33396	1.67841	1.39115
EPlOSAG00000037496	0.165618	0	0.646996	1.06747	0.733873	0	0.648914	0.310008	AT5G40710	1.31156	1.2743	1.32519	1.91862	2.17169	2.34791	2.75723	3.3203	3.36602
EPlOSAG00000034387	0.249502	0	0	0	0	0.419153	0	0	AT1G72410	4.38975	4.98066	4.85143	8.20043	6.87995	6.69684	11.691	12.5394	11.4366
EPlOSAG00000034385	0	0.258087	0	0	0	0	0	0	AT1G72416	0.519096	0.606211	0.709913	0.535058	0.583736	0.15373	3.88141	5.30302	6.15091
OS01G0604550	1.63432	2.40074	1.36813	2.74096	3.15294	2.46543	2.30875	1.62324	AT5G56520	0.810021	0.8239	0.703015	1.38224	0.994431	1.61924	3.12046	3.55705	4.45878
OS01G0946600	172.483	128.415	266.42	1.22305	1.56955	1.33179	1.29973	0.915599	AT3G43440	2.04363	1.76573	1.53267	2.7653	2.87407	2.43797	3.9205	4.23381	3.68692
OS01G0802700	0	0	0	0.21411	0.0654211	0.16742	0.188004	0.0207268	AT2G31610	48.9883	43.1071	39.2484	109.427	98.0734	93.6145	84.3964	92.6508	102.451
OS04G0686600	3.87519	4.78978	4.4266	7.59023	8.09021	5.0609	5.3831	5.25445	AT2G35310	0.0379096	0.0192796	0.0777674	0.45871	0.13281	0.189454	0.711945	0.593059	0.454323
OS04G0434400	0.0283358	0.107346	0	0	0	0	0	0	AT4G25140	0.0888662	0	0	0	0	0	0	0.0243899	0
OS02G0672600	6.97966	5.97128	6.67922	9.00489	7.45776	9.559	7.74789	7.46138	AT3G51870	6.95458	5.80047	6.38429	20.7012	15.9991	15.866	18.2851	20.9292	19.8944
OS01G0766300	0.483515	0.0814099	0.818515	0.571348	2.57102	3.41159	1.85238	1.99113	AT3G47350	6.72163	7.50893	7.13793	17.9031	14.5291	13.7669	21.3902	23.8378	20.1857
OS06G0192900	18.8901	20.5624	21.9031	19.4474	22.6774	29.6125	29.8606	30.5012	AT5G25230	0.171473	0.12458	0.17588	0.177844	0.200242	0.277487	0.0766735	0.168079	0.0936026
OS12G0618366	0	0	0.314462	0.172942	0	0	0.140175	0	AT1G49780	7.64436	5.15157	4.6948	5.48134	5.96963	9.05552	4.32015	4.17019	3.65534
OS04G0167900	0.0297855	0.263289	0.116359	0.623933	0.659917	1.15088	0.700223	1.56109	AT2G17570	0.620299	0.753608	0.406486	0.729719	0.925583	0.774991	0.788752	1.10659	1.41854
EPlOSAG00000052314	0	0	0	0	0	0	0.348491	0	AT1G15125	0.215894	0.274492	0.166082	0.631317	0.609281	0.431576	8.38355	10.325	10.3682
EPlOSAG00000052317	0.417644	1.05479	2.03944	0	0	0	0	0	AT5G02430	0.480937	0.462001	0.475025	0.916015	0.738434	0.614228	1.20218	1.35663	1.08592
OS12G0486800	0.0523071	0.198158	0.335703	0.0481629	0.0110371	0.0251068	0	0	AT4G12840	0.650253	0.781649	0.545697	0.858342	0.966445	1.10784	0.954048	1.25332	1.47849
EPlOSAG00000052319	0	0	0.514052	0	0	0	0	0	AT2G03150	5.98622	6.22038	6.55622	9.86183	10.2249	9.13948	13.0105	14.133	13.0895
OS03G0243700	4.091	2.78561	1.90632	10.4481	11.6507	7.61388	7.85741	3.5035	AT1G22890	0.49597	0.504469	0.508715	8.30948	5.5245	3.81328	5.86626	7.35061	6.99749
OS05G0209000	2.68826	2.57305	1.63883	2.59352	3.08549	1.63963	1.58778	1.82689	AT5G08460	0	0.0433561	0	0.0515776	0.0248886	0.106512	0.0750483	0.175484	0.199895
OS02G0233333	7.508	8.58865	9.74808	12.8097	12.7205	10.0163	9.45972	9.34157	AT5G24410	0.0223954	0	0	0	0.0523055	0	0	0	0
OS04G0182250	0	0	0.00944282	0	0	0	0	0	AT1G28290	1.66971	0.71994	1.43338	3.68936	2.33134	2.82985	7.83932	8.05447	6.65753
OS04G0632901	0.019674	0	0	0.0475525	0.174356	0.77671	0.950721	1.01272	AT5G28370	0.0301309	0.102157	0.0515086	0.145835	0.187659	0.0702708	0.223986	0.206741	0.230267
OS05G0102000	0.0104639	0.0396408	0.153292	10.1334	10.2934	10.7055	10.851	7.36455	AT2G40730	7.06042	7.1529	7.66333	9.75234	9.84818	8.99853	12.5733	13.2646	12.0684
OS03G0448500	2.5907	3.48138	2.93247	12.1335	11.1382	6.45253	6.6539	6.12763	AT2G34040	4.47154	5.0637	5.32582	11.7616	10.9696	9.29893	15.177	16.0253	17.1371
OS07G0644600	23.6131	24.0185	21.7207	16.3297	24.7633	23.1473	20.5056	26.6475	AT2G44870	25.5788	22.8121	22.7295	34.6886	32.7803	34.7881	36.695	39.7306	40.4135
OS12G0563500	7.6323	5.72174	7.11967	7.4309	6.17202	5.61595	4.73421	3.52447	AT3G49400	0.295384	0.291861	0.328944	0.490173	0.443497	0.615784	1.26796	1.24385	1.26648
EPlOSAG00000032055	0	0.156517	0.484204	0	0	0	0.16188	0	AT1G13310	0	0.0177073	0.0178563	0.0842601	0.0406595	0.0174004	0.0613016	0.0430021	0
EPlOSAG00000007760	0	0	0	0.952513	1.30968	0	1.15806	0	AT1G51660	1.78779	1.88627	1.71057	4.43949	2.47723	2.32031	2.12974	2.10915	2.2802
OS02G0630100	0	0	0	0.0313644	0.0287502	0	0	0	AT5G09395	0.247284	0.077391	0.351191	0.161116	0.222132	0.228149	0.736789	0.532508	0.356814
OS01G0317500	2.02228	2.46858	2.43588	3.8017	6.27268	2.03841	1.40864	2.77593	AT5G06090	0.0573188	0.0728762	0	0	0	0	0	0	0
OS09G0290900	5.11863	5.45429	5.22212	8.73498	7.9573	7.5383	8.33453	9.51833	AT2G30560	0	0	0	0	0	0	0.0479064	0	0.170135
EPlOSAG00000045598	4.10631	3.33346	1.71874	0.945242	1.08307	0	0.957684	0	AT3G16552	0	0	0	0	0.430267	0	0	0	0
OS03G0854200	4.55586	3.80717	3.64789	6.72033	6.13544	4.58656	5.05327	2.00654	AT1G23310	483.082	457.798	421.252	561.243	533.776	533.124	391.744	399.091	372.929
OS08G0562866	0.501747	0.600251	0.799518	0.0425521	0.156022	0.266184	0.413878	0.3213	AT3G29280	2.04539	1.52565	1.4336	3.13492	3.42359	2.86213	3.80124	2.89106	3.90782
OS01G0598400	0.0707797	0	0.158003	0.293274	0.0298699	0.0849336	0.0792358	0.132488	AT3G24670	1.99737	1.77334	1.51048	4.69032	4.24986	3.84051	3.47691	3.97207	3.73965
EPlOSAG00000041740	0.148927	0.376126	0	0	0.659917	1.00077	0	0	AT3G14390	11.1817	9.5584	9.63885	18.4717	17.364	17.5437	13.2176	14.4956	14.5727
OS03G0822900	6.49546	6.69901	6.12014	11.1305	12.995	12.9671	14.2159	14.8643	AT4G33480	3.55023	4.12132	3.91852	9.24534	8.35933	7.67552	13.0222	15.982	15.0403
OS04G0485300	50.883	53.5777	55.361	58.2868	62.9084	45.7597	49.6797	46.6931	AT1G31020	1.59534	1.33799	1.46409	2.6077	3.13768	2.48974	2.82523	2.48884	4.34592
EPlOSAG00000035701	0	0	0	0	0.295588	0.336196	0	0.374593	AT5G28740	5.46129	5.08617	5.26027	10.9139	10.5628	8.89581	10.0761	11.3751	11.0714
EPlOSAG00000035704	0.489469	0.618093	0.239018	1.38023	3.07261	0.616715	0.639269	0.916202	AT4G12650	14.4637	14.3938	13.2119	23.4484	20.6235	20.2746	27.4269	26.9988	26.8903
EPlOSAG00000035706	0.538644	0.22673	0.350708	0	0	0	0	0	AT1G02350	2.60702	3.36312	3.71753	3.23146	3.19292	2.41507	5.0005	5.81138	5.89751
OS10G0476600	29.5279	28.2319	28.8888	36.454	36.7932	33.1575	31.0935	31.445	AT2G41280	0	0	0	0	0.0521752	0.0446571	0	0	0
OS04G0634500	3.16736	3.87743	2.71515	6.48553	4.63747	4.32189	3.82963	3.26211	AT1G16890	9.73045	8.23325	6.6464	12.211	11.6855	11.4457	12.7179	14.3792	14.5462
OS04G0565400	0.0113948	0.0143892	0	0.89969	0.993006	6.47027	7.06903	6.18545	AT5G24520	4.72125	4.14731	4.84257	6.94188	5.73056	6.2633	10.1428	10.4134	9.52713
EPlOSAG00000002728	3.65021	1.45561	1.3134	7.73917	3.40517	4.84122	4.51644	1.43844	AT2G39370	0	0.0774458	0	0	0	0.0190259	0	0	0
EPlOSAG00000021356	16.0097	17.2762	16.7729	18.7616	10.7486	3.42308	6.46292	4.3589	AT5G42590	0.101937	0	0	0	0	0	0	0	0
OS12G0621700	4.5474	3.17047	2.87158	5.8357	4.9336	5.37498	4.20768	1.92697	AT1G52820	0	0	0	0	0	0.0198549	0	0	0
OS02G0285300	23.6766	20.7784	32.7656	127.381	90.4892	66.9403	75.4598	43.1531	AT1G55290	0.0389527	0.0396202	0	0.0706998	0.090976	0.0584003	0.205744	0.064145	0.0811868
OS08G0377400	2.12739	2.0925	1.99289	2.79834	2.36203	3.06337	2.76902	2.38385	AT2G25450	20.2397	22.1215	20.003	5.74212	6.9516	6.36893	8.89637	12.5918	14.7313
OS11G0131900	146.88	90.7145	133.148	11.0551	10.7386	14.9795	13.7236	17.8109	AT1G52825	1.37518	1.68672	1.36903	2.0555	2.45608	2.46601	2.37371	3.13042	4.2993
OS09G0441700	0.096299	0.0304012	0.258636	0.834046	1.83131	1.67845	1.72935	1.37445	AT1G52827	6.7359	4.75786	3.79035	4.24506	2.73126	3.03901	1.81186	2.31089	3.26607
OS09G0278300	0.221692	0.2036	0.108257	0.365342	0.498615	0.279325	0.256638	0.160329	AT4G31398	0.584079	0.594087	0.838723	0.459382	0.37514	0.496223	1.09691	1.20228	0.821718
OS08G0155000	7.17397	5.14377	5.53683	12.5884	9.06968	8.06869	7.58298	3.41401	AT2G17390	15.4963	14.7699	15.167	21.1106	19.4213	18.4836	23.8494	23.0366	27.6602
OS01G0953500	15.3146	12.6769	12.3862	11.5307	18.6315	23.0288	18.4092	22.8222	AT1G56070	135.158	124.185	119.058	238.604	214.131	207.245	179.118	192.343	188.886
OS04G0648700	5.95956	5.80326	6.66049	6.46856	7.21143	7.65533	6.72071	6.31021	AT5G27390	15.561	13.878	13.1915	25.3381	22.817	27.8106	32.4896	33.5839	31.316
OS02G0580366	0.0768466	0.0323469	0.100069	0.165102	0.151341	0.172132	0.167276	0	AT1G66340	3.49058	3.38273	3.19241	4.92758	4.41589	4.17694	5.36035	5.301	5.71912
OS02G0672100	5.65263	6.24464	5.50635	28.3241	24.7136	25.6948	22.6241	23.8374	AT1G32610	0.333501	0.457941	0.410485	0.847433	0.603654	0.833341	0.841614	1.57892	1.02527
OS04G0346900	0	0	0.0146585	0.0241849	0	0.0252147	0	0	AT5G47150	0	0.0208043	0.0419589	0	0	0	0	0.0168411	0.0213154
OS02G0767900	5.48456	5.50108	5.32585	12.4231	8.33239	7.63433	5.93514	4.69311	AT2G34590	16.9832	13.6298	11.9482	35.7339	31.3156	32.6008	26.5538	30.1895	30.8595
OS08G0105901	0.0370524	0.0701837	0.126654	1.52246	1.3682	1.12044	0.774274	1.73389	AT5G44290	6.69971	7.05012	7.44757	5.47635	5.35802	6.42036	8.83634	8.51659	8.69952
EPlOSAG00000023195	0	0	0	0.631769	0	0	0	0	AT5G14080	1.12962	0.858708	1.13425	1.65461	1.48577	1.46184	2.62388	2.66301	2.88724
OS02G0161800	0.794315	2.1421	0.841503	5.77048	4.53386	1.67367	0.843997	1.58762	AT5G64320	0.919643	1.05645	1.08754	2.21246	1.51614	1.57884	1.6509	1.8262	1.74763
OS03G0231650	0.834577	0.371962	1.47035	0.210948	0.193366	0.0549826	0.042745	0.0612622	AT1G62450	0	0	0	0	0	0	0.0479064	0	0
OS01G0100400	1.82248	2.27895	1.79728	6.81878	6.13225	3.94287	3.95934	3.52787	AT2G38390	0.349058	0.335314	0.0198904	0.375434	0.0452912	0.0193825	0	0	0
OS12G0291100	180.618	154.268	129.682	2048.15	1867.1	9535.29	9721.38	9860.38	AT1G48430	2.18334	2.20893	2.13223	5.18535	4.16352	3.84217	6.22955	7.09515	6.81379
OS03G0745600	0.403848	0.558542	0.882739	0.805679	0.511287	0.807677	0.728377	0.827929	AT5G65300	0	0.0562916	0.0283827	0.33483	0.129257	0.110632	0.357277	0.364544	0.519069
OS04G0608500	45.9154	40.2748	44.7076	36.9371	31.4927	29.4936	28.7922	23.7241	AT2G42390	2.90014	3.3414	3.13261	4.40979	3.74636	4.00176	6.77798	7.73421	7.03418
OS12G0587116	0.0996713	0	0.0243358	0.160605	0.0368047	0	0.195263	0	AT4G38870	0	0	0	0	0	0	0	0.0283379	0.0358666
OS05G0556000	18.4112	15.7523	22.4438	13.669	11.6264	8.40489	7.92816	6.86754	AT3G61113	0.367332	0.41514	0.293044	0.395089	0.428961	0.611918	0.479064	0.369661	0.467871
OS12G0110100	11.37	10.6202	10.7695	6.38327	8.05043	6.06384	5.90453	6.23278	AT2G42395	0.634644	0.30739	0.526962	2.0478	1.41166	1.14784	1.24153	1.41834	1.25976
OS03G0320600	0.511823	0.346244	0.267786	1.76727	1.26897	1.87323	0.978824	0.444807	AT1G27110	0.117226	0.0132483	0.0400794	0.126084	0.106473	0.156224	0.229324	0.278837	0.10859
OS08G0430300	4.81862	5.21183	5.02322	1.958	1.87216	1.21426	1.0945	1.56863	AT5G53840	0	0.0204927	0	0	0	0	0	0.0165888	0
OS12G0479300	0.0703151	0.266378	0.0610423	0.201426	0.219257	0.196877	0.122446	0.073121	AT3G07370	2.4191	2.58814	2.20557	3.33911	4.33162	3.43881	3.59662	4.26396	4.3137
OS02G0775100	10.9288	8.5419	9.39268	10.4178	9.24358	14.4947	13.5223	14.2552	AT3G52210	2.79157	2.86012	2.299	3.89559	4.56865	3.64558	4.59204	4.76476	4.65039
OS04G0567800	6.17341	7.10966	5.37805	14.8815	13.6046	7.63311	8.56266	7.41868	AT3G50050	1.1129	1.00868	1.00587	1.09329	1.23528	1.35464	2.1728	2.00503	1.88319
EPlOSAG00000042064	1.97043	2.17719	2.4055	2.57972	3.0923	3.31023	1.44758	2.30519	AT3G17205	3.83862	4.49006	4.52106	5.42958	5.47192	5.62941	7.90034	8.40286	8.40064
EPlOSAG00000042063	0	0	0	0	0.175163	0	0	0	AT1G18360	4.30864	5.02021	4.25445	4.29919	4.14913	5.23852	16.0776	15.7921	15.4809
OS06G0267600	27.173	28.7857	31.7108	17.6713	18.2587	19.8717	22.0401	23.1814	AT4G31640	0	0.0214067	0	0	0	0	0	0	0
OS08G0459700	0.491556	0.103455	0.120018	4.25737	4.77982	4.95476	4.46722	5.13728	AT1G69670	2.35526	2.49932	2.33212	3.24468	3.56006	3.14899	4.00912	4.60886	4.72829
OS09G0443700	4.08758	2.8191	1.4433	8.86648	11.0533	3.90889	4.68152	5.41474	AT5G43310	5.73272	6.42159	7.12194	9.2987	7.92811	7.57606	10.6805	11.4443	11.2595
OS11G0240600	30.1343	29.2236	29.104	18.8928	20.2802	10.1294	9.02729	9.73473	AT1G47780	0	0	0	0	0	0	0	0.0553651	0
OS01G0746700	135.91	143.287	90.1448	36.4775	40.2101	16.6243	14.3843	15.016	AT2G19130	0.264621	0.326831	0.252034	0.445985	0.3642	0.472305	0.532458	0.614736	0.709115
OS07G0521300	8.82835	10.0115	11.4296	0.791225	1.0728	0.378086	0.280574	0.210634	ATCG00760	3231.87	3490.75	3989.61	5592.68	5496.93	4964.5	5334.55	5199.47	4030.87
OS05G0341300	4.13281	5.2522	4.30064	7.62747	8.02536	5.10185	4.65612	4.70829	AT2G21480	0	0	0.00926393	0	0	0	0	0	0
OS09G0339000	0.0702437	0.0665269	0.0857536	1.06113	1.37473	0.855547	0.642191	0.443759	AT1G47960	0.476314	0.605594	0.305346	0.0540323	0.191203	0.193407	0.0524133	0.208347	0.294723
OS12G0600301	0	0.0405688	0	0.051767	0	0.0539712	0.0419587	0	AT2G24500	3.95298	3.93636	3.35989	10.5697	9.47449	8.01258	7.59245	8.86525	10.2699
OS04G0672300	2.58324	1.95724	1.60718	9.5275	12.8316	5.30412	5.47311	3.36686	AT5G56310	0.155249	0.131591	0.172508	0.328742	0.362591	0.232758	0.592228	1.03327	1.32127
EPlOSAG00000013520	0	0	0	0.719923	0	0	0.583519	0.836301	AT1G05360	1.94242	2.11517	2.20329	2.98633	3.41581	4.00856	5.04267	5.09905	4.78673
EPlOSAG00000028508	2.13463	0	0.347461	0	0	2.39072	0.464654	0	AT2G46770	0	0	0	0	0	0	0.0228109	0	0
OS12G0640800	26.1286	32.2375	27.9198	39.0421	43.7605	36.1034	38.4856	49.0955	AT2G38025	6.72421	6.65582	6.20267	13.6789	12.9643	11.1414	13.0307	14.5844	17.0483
OS02G0756200	0.357664	0.301101	0.515647	0	0.0754692	0.343349	0.0889763	0.223162	AT2G38020	3.71209	3.5644	2.98299	4.98346	3.87081	3.56582	5.96846	6.52186	6.11797
OS03G0171300	0.243185	0.187666	0.277089	0.566015	0.299329	0.363148	0.264676	0.0758669	AT3G54960	2.21003	1.81561	1.90563	3.21781	2.86443	2.64588	4.64646	4.22925	4.10006
OS02G0669700	2.5802	2.3161	1.76092	1.27734	1.56116	1.35784	1.27893	0.640081	AT4G02870	0	0	0	0	0	0	0.0338374	0.0237364	0
OS01G0916350	0.0473193	0.0085363	0.026408	0.0272314	0.0199693	0.0397473	0.0309006	0	AT3G45210	6.53416	6.40679	4.30714	8.01591	6.74268	6.44048	3.48421	3.56185	4.35725
OS05G0190000	3.12308	4.4218	3.16104	12.9317	17.9484	11.2882	9.641	15.4473	AT2G42640	0.429691	0.427755	0.506374	0.862864	1.09965	0.721891	1.33063	1.6109	1.8388
OS01G0952900	0.113455	0.405928	0.535555	0.426568	0.167577	1.27066	0.592708	0.92026	AT5G38140	2.40234	3.35384	4.08264	3.41984	3.21796	4.99065	10.5603	8.68777	9.35142
OS03G0808600	34.9582	31.923	39.8513	14.7563	16.7283	16.9188	17.3109	19.2825	AT5G56660	1.33169	1.23745	1.12983	1.7904	1.7471	1.77471	2.1034	2.82917	2.24443
OS02G0532500	17.1782	20.4206	17.647	30.6134	32.2381	27.0366	29.973	33.1696	AT5G50550	0.016077	0.163525	0.0164901	0.0194534	0.0187743	0.0160691	0.0754819	0.158848	0.502625
OS07G0558250	0	0	0	0	0	0.122253	0.142564	0	AT1G78880	4.93388	4.14142	4.06573	7.57848	7.10419	7.00218	10.5703	11.2998	11.3442
OS09G0456100	11.1556	11.0599	8.75821	28.4976	26.0624	15.2128	15.875	12.9813	AT5G35190	0	0	0	0	0	0	0	0.0173831	0
OS04G0437300	0.245619	0.148339	0.0938666	1.9961	2.76035	2.15285	1.54816	1.33929	AT2G33060	0.774288	0.600511	0.66513	0.913475	1.07373	1.04477	1.81765	1.64163	1.44234
OS03G0803600	3.68049	4.71359	5.02213	10.8937	10.564	8.3318	5.14781	3.07818	AT5G51810	0.155174	0.087685	0.0884231	0.104312	0.120806	0.0172331	0	0.0141962	0.0359355
OS12G0123900	91.8123	85.7865	81.2785	71.013	70.227	47.7648	50.8781	44.302	AT4G17910	1.20975	1.51759	1.58552	1.98428	2.05629	2.04213	3.31323	3.79615	3.78212
OS09G0479600	1.43649	1.88321	1.88486	2.27934	2.25133	1.82375	1.57537	1.64205	AT3G57700	0.0525842	0	0.0539355	0.0636275	0.153516	0.0788375	0.154303	0	0.0547991
OS10G0537800	0.287354	0.794848	0.614739	0.463027	0.505278	0.0459755	0.160842	0	AT1G04013	0	0.329611	0	0.130705	0	0.107966	0	0.17788	0.112569
OS07G0107800	5.08957	4.13898	4.55866	2.76274	2.38068	3.28018	2.7479	2.88538	AT1G04010	1.26976	1.42477	1.2197	2.01199	2.4831	2.40734	2.83884	3.08667	2.44696
OS01G0954500	22.3956	23.1834	22.4733	9.66962	11.0636	8.12309	6.7803	10.2024	AT4G18700	10.0283	10.9261	9.61492	17.2012	14.392	11.5215	8.75479	9.49117	9.99202
OS07G0572100	68.3118	79.7767	65.1827	16.3187	25.4112	4.9552	4.46752	7.41051	AT3G18518	0	0	0	0	0	0	0	0	0.0704265
OS11G0518600	1.10478	1.32262	1.05095	1.10972	1.52584	1.80777	3.09191	3.30336	AT3G09735	6.25264	4.22801	4.72937	13.0605	11.6256	11.5914	12.2591	15.6173	16.4538
OS02G0762800	0.532796	0.320757	0.344884	1.05818	1.2262	1.1865	1.15707	0.463862	AT1G76880	9.80731	9.94096	10.9381	19.6555	19.496	18.2078	22.7846	23.1949	21.2279
OS01G0616500	15.1155	11.2376	10.4796	18.0926	12.8595	11.0911	8.32881	4.48008	AT3G09730	0.220208	0.271977	0.354933	0.647103	0.863301	0.927562	1.62467	1.50231	1.47525
OS08G0541900	0.27163	0.654837	0.651154	0.358111	1.05773	0.539296	0.419264	0.369778	AT5G41990	3.99753	3.89611	3.63515	5.73228	4.59855	4.55614	6.66702	7.84053	7.32454
EPlOSAG00000018657	0	0	0.191458	0.315885	0	0	0	0	AT5G12900	3.65736	3.16461	2.68325	8.14405	6.40646	6.86687	6.75229	8.39626	8.82711
EPlOSAG00000013385	0.171533	0.216609	0	0	0.12668	0	0	0	AT1G64850	19	16.94	14.4335	14.4407	15.3234	17.2102	13.0323	13.273	15.2214
EPlOSAG00000051440	2.33655	0.32784	1.01421	0.418334	2.30079	4.7976	2.03443	1.94383	AT2G29080	8.62395	8.99641	10.1235	14.2627	16.1794	15.6762	19.4566	23.1428	23.352
EPlOSAG00000010876	3.49303	7.35156	5.68572	2.3452	0.429946	0	0	0.544863	ATMG01290	0	0	0	0	0	0.0800107	0	0	0.0834218
EPlOSAG00000010872	1.72045	0	0	2.3102	6.35293	4.33542	0.748995	3.75711	AT5G43430	2.58952	2.41026	2.00458	3.01511	3.28073	3.02776	4.98931	5.71252	5.34627
OS09G0569400	10.627	8.54344	10.2308	8.70335	7.20016	8.63162	7.51281	6.13785	AT5G46400	1.47567	1.56286	1.71645	1.86842	1.89203	2.37208	3.75879	4.24007	3.61469
OS05G0120300	0.59056	0.372875	0.576765	6.7504	5.75161	2.48029	2.28979	3.00538	AT2G22680	0.124001	0.0687956	0.115624	0.245523	0.210625	0.101405	0.132315	0.148507	0.129223
OS04G0379400	23.2194	25.4116	23.4433	53.9863	41.8129	35.3384	37.6647	44.0978	AT4G37490	0.280519	0.486732	0.55853	2.21629	1.44522	1.76475	4.78397	5.74711	5.69193
EPlOSAG00000051449	17.4245	16.3615	16.1448	15.4783	12.2085	3.75288	3.79287	4.1815	AT2G26900	20.6877	23.0517	20.5535	30.5989	28.6409	36.1363	90.3547	105.072	104.751
OS01G0252600	0.232667	0.293808	0.211001	2.67791	1.86558	5.66763	7.16275	8.30585	AT1G01190	0.168969	0.0781203	0.0472667	0.0185868	0	0.0153533	0	0.037943	0.0160078
OS02G0174800	2.30042	3.25824	2.20115	13.5999	7.04819	9.00873	10.5562	10.445	AT4G00650	1.14131	1.03188	1.24868	2.13287	1.92514	1.4703	2.56016	2.57901	2.40519
EPlOSAG00000012435	0	0	0	0	0	0	0.491987	0	AT2G23140	2.93946	2.65677	2.69475	3.13292	3.27256	3.33381	5.00548	5.26063	4.76156
EPlOSAG00000012434	0	0.475689	1.1037	0	0.5564	0	0.983974	0	AT3G05155	0.0125627	0.038334	0	0.0152011	0.0146705	0.0125566	0.0294912	0.0206876	0.0785513
EPlOSAG00000012439	1.23946	1.17388	0.302627	0	0	1.04112	1.6188	0.580015	AT3G05152	0	0.0394203	0	0	0	0	0.0909807	0.0319107	0.0403887
OS12G0266401	0.383084	0.532127	0.860511	0	0.113166	0.0321782	0.250163	0.501947	AT3G26730	5.62419	5.78786	6.36255	10.8185	9.72612	9.97801	12.7757	14.2737	11.5325
EPlOSAG00000023682	0	0	0	1.51008	0	0	0	0	AT3G05150	0.0818362	0.0138731	0.0139899	0.0825189	0.111494	0	0.0800464	0.0336908	0.113711
OS01G0703300	1.24652	2.33109	1.31034	14.5047	13.5487	6.52209	7.90395	6.25175	ATCG01270	63.7938	50.2727	61.8961	61.1966	68.725	70.196	62.3311	60.949	55.3407
EPlOSAG00000023686	6.5724	12.7685	4.9376	4.07325	14.935	5.09602	6.60298	8.51706	AT5G15025	1.74939	2.37248	2.31769	2.55777	2.8941	2.98707	4.02115	4.92135	5.08941
OS07G0115600	0.0614576	0.20178	0.0120044	0.297089	0.272326	0.371686	0.449493	0.184061	AT5G15020	5.75056	6.36604	6.30248	8.20892	8.86267	8.27056	9.80623	10.1467	10.0217
OS06G0142400	4.10815	3.16603	23.9846	0.973481	9.23572	0.253732	0.355066	0.73505	AT1G33250	3.35794	2.94047	3.85479	4.68203	3.5967	4.42318	7.55651	7.26911	5.68937
OS01G0817000	10.3722	14.1878	10.8275	10.0711	15.584	17.8749	17.6281	17.7994	AT2G18660	0.0127715	0	0	0.0618147	0.0298285	0.0638262	0	0.0210314	0.0266189
EPlOSAG00000011710	0	0	0	0	0	0	0.343717	0	AT4G30110	0.2268	0.179423	0.120622	0.0813128	0.117712	0.193105	0.088736	0.214406	0.280122
EPlOSAG00000047355	0	0.269557	0	0	0	0	0	0	AT3G61250	0.24058	0.114194	0.427721	1.53315	0.8241	0.769477	0.734193	1.01684	1.11985
OS11G0173550	0.0623571	0.0214755	0.0885826	0.00913446	0.0167462	0	0	0.0106111	AT1G53520	11.1661	9.90968	9.11209	20.0143	18.5992	22.1986	22.5543	25.1164	24.8841
OS02G0110000	0.066171	0.0278532	0	0.142166	0.0325791	0.0370548	0.0288075	0	AT5G14670	0	0	0	0	0	0	0	0.0217118	0
OS03G0826100	0	0.010258	0	0.026179	0	0	0	0	AT1G28070	0.297951	0.165303	0.11113	0.229424	0.316309	0.514389	1.71681	1.44964	2.62514
OS05G0196400	4.91367	5.8082	5.03491	15.6146	13.4684	8.67427	9.19489	12.9067	AT3G22142	0.714493	0.504511	0.878213	0.593035	0.779203	0.56069	0.880226	1.09879	1.50148
OS04G0208800	0.146654	0	0.0613835	0.168793	0	0.140784	0.0273624	0.0784317	AT2G04270	4.55933	4.87743	5.36978	7.60011	7.75928	8.59153	11.9979	13.0052	11.3767
EPlOSAG00000000019	0	0	0	0.27155	0	0	0	0	AT3G07320	0.520672	0.655024	0.857294	2.5035	2.33611	2.01319	10.7915	11.2479	10.3523
EPlOSAG00000016846	0.157473	0.198854	0.461383	0.76123	0	0.793642	0.205667	0.294762	AT1G57630	0	0	0	0	0.17621	0	0	0	0
EPlOSAG00000016847	0	0	0.191458	0	0	0	0	0	AT4G08790	1.14539	0.883803	1.03303	2.34174	2.12164	2.09226	2.20204	3.10565	2.84002
EPlOSAG00000005195	0	0	0	0	0	0	0.374497	0	AT1G26790	3.73946	2.13949	1.13868	18.2641	14.8291	9.14938	0.0228605	0	0
OS06G0140800	32.2834	35.2124	41.0163	24.47	29.933	24.3683	22.159	24.5049	AT4G05800	0	0	0	0	0	0	0	0	0.15486
OS07G0233300	8.43838	7.01769	6.26763	15.5113	15.8319	11.9281	10.2541	7.8976	AT4G08795	0.0777365	0.0790685	0	0.188124	0	0.0776982	0	0.0640059	0.0810108
EPlOSAG00000046006	0	0	0	0	0	0.632839	0	0	AT1G26796	0	0	0	0.0614065	0	0	0.0595666	0	0
EPlOSAG00000046009	0	0	0.253553	0	0	0	0	0	AT5G08680	20.7513	19.6129	15.5838	28.0952	24.178	21.8216	20.7159	23.0942	22.5071
EPlOSAG00000046008	0	0	0.271926	0.448648	0	0	0	0	AT2G09200	0	0	0.245773	0	0.0699543	0.0598744	0.140625	0.0493231	0.249708
OS10G0350800	2.09459	2.01931	1.64973	4.79048	4.55753	4.57825	5.29477	5.35409	AT4G12500	0	0.0566412	0.085677	0	0	0	0	0	0
OS03G0616700	22.8742	25.3113	24.1528	38.2935	34.5976	23.7027	25.8306	21.8134	AT3G26085	8.59786	8.49366	7.92131	11.6924	9.5961	9.84844	10.8509	9.55382	11.8542
OS06G0599200	0.40072	0.0144578	0.111817	0.0368971	0.659523	0.115404	0.179437	0.128585	AT1G28240	4.88248	4.60357	5.04118	4.41782	4.64204	4.93406	5.64208	6.43036	5.24572
OS07G0243150	156.542	141.283	142.245	196.969	158.032	400.944	379.487	324.585	AT1G05947	0.0612684	0	0	0	0	0	0	0	0
OS03G0685750	12.4738	12.9999	13.7236	10.5745	13.0598	13.8861	15.8334	14.8626	AT2G43110	2.36993	2.39141	2.64305	12.3582	10.9164	6.8243	6.1816	7.57302	7.03683
OS01G0115900	0.455448	0.224078	0.323498	0.686232	1.73858	1.93768	2.07034	1.73826	AT4G12530	0	0	0	0.0445828	0.0430267	0.0368268	0	0	0
OS10G0575700	6.97211	8.33068	6.99238	7.25161	9.39166	14.1184	14.6719	13.274	AT1G05940	4.42794	4.2554	4.17142	5.35786	4.65004	5.21115	6.90484	7.56271	7.21492
OS07G0273900	13.2798	17.7683	16.3464	10.2902	13.9475	5.37763	5.80695	5.83177	AT5G55125	2.75223	3.18113	2.22415	7.66963	5.79492	4.62648	6.36301	8.82409	8.86522
OS03G0163200	2.8677	2.59362	2.10054	1.87332	2.3325	2.92963	3.25188	5.20463	AT3G51460	4.89232	5.44266	4.37958	6.36903	5.77689	5.27193	7.1908	8.04739	8.93355
OS12G0459300	4.13395	6.23197	5.04412	16.4465	17.0322	19.6771	22.9289	30.0824	AT5G55120	6.03191	5.87034	5.04796	16.2893	15.5607	15.6478	14.2726	15.4526	13.0148
OS04G0233851	0.226552	0.0572174	0.287639	3.24899	2.00777	2.24553	2.18957	0.975355	AT5G10530	0.370991	0.296488	0.362404	0.87643	0.969619	1.02414	3.3281	3.76738	3.48876
EPlOSAG00000023407	82.2258	98.9814	68.2969	112.682	130.532	94.2423	97.3543	113.637	AT1G13060	10.6345	9.62486	9.77872	17.3576	18.5969	16.7867	22.2972	25.3766	24.0149
OS04G0580866	11.4752	8.50742	9.61643	6.14362	5.90492	4.41524	4.3511	2.28653	AT1G64200	17.0223	16.2844	11.5056	8.37383	10.301	8.4037	5.09198	4.79661	5.57581
OS03G0737200	8.68612	7.82863	6.85311	9.66024	10.2638	8.64094	7.60748	5.03708	AT1G50560	0.0268834	0.013672	0	0.0162646	0.0156969	0	0	0.0110675	0.0420236
OS01G0153000	0.00613987	0.00775333	0.00599645	0.019787	0.00906885	0	0	0	AT1G55860	7.53083	7.68386	8.66056	13.0336	10.67	9.93637	20.6381	21.1052	17.569
OS10G0142700	0.858339	1.62585	1.47933	0.040679	0.149153	0.042411	0.362687	0	AT2G07773	2.17302	2.10206	2.05741	2.94196	2.69731	2.15676	2.28305	3.10295	3.26222
OS01G0197200	12.2939	10.7458	10.0219	14.3249	14.4913	15.5235	13.8989	12.7428	AT1G22510	0.83079	1.16191	1.14506	1.7278	1.1824	1.03798	1.95029	1.79563	2.59735
OS07G0143900	0.0119923	0	0	0	0	0	0	0	AT1G55865	0.310348	0.771628	0.778123	0.959674	0.765102	0.723789	0.84997	0.823379	1.07807
OS07G0408500	2.4401	1.88225	2.28605	6.92078	4.20754	7.02996	4.49913	1.24003	AT2G07774	6.32599	5.50858	5.6483	7.92986	7.1216	6.73227	8.49353	9.10574	10.1021
OS06G0699600	4.10346	3.7938	3.92303	3.98229	4.99834	7.09508	7.36905	7.75579	AT2G07777	0.77563	0.890716	1.28316	0.741734	0.905761	0.675216	0.660774	0.84464	1.21245
OS06G0237200	1.87257	1.24219	1.33111	2.04341	2.20569	1.334	1.6872	0.643348	AT2G07776	0.0913822	0.0619654	0.124974	0	0.0711426	0.0304457	0.0715069	0.100322	0.126975
OS11G0112200	0.606684	0.425617	0.510219	0.05431	0	0.22649	0.176079	0	AT1G66690	0.0200274	0	0	0	0.0233875	0	0.0470146	0	0.041742
OS02G0153600	0.595612	0.784134	0.606452	1.44982	1.27282	0.72384	0.430326	0.237209	AT1G30270	2.47568	2.52877	1.89372	2.64019	1.87428	1.63566	3.25061	3.46356	4.00112
OS11G0545300	23.5035	31.4427	25.3323	81.0872	96.9978	52.9839	51.8865	49.1974	AT5G64570	1.49691	1.95758	2.94889	24.572	24.3063	27.889	36.9994	42.864	36.8695
OS01G0278100	0	0.0638986	0.0494194	0.298967	0.348788	0	0.0440585	0.0315724	AT2G03210	0	0.0287976	0.01452	0.0685168	0	0	0.0166159	0	0.029505
EPlOSAG00000015761	7.41502	11.9173	15.4712	11.4051	3.98266	12.4569	14.5266	25.2357	AT2G32530	9.76385	7.76721	7.2317	10.3096	14.8706	14.6283	2.60573	2.27638	2.0136
EPlOSAG00000015767	0	0	0	2.69189	4.52378	0.46775	1.81821	0.521173	AT1G45165	0	0	0.0518571	0	0.0590403	0.101066	0.178028	0.333023	0.368812
EPlOSAG00000052791	0	0.336947	0	0.429954	0.788234	0	0	0.499457	AT5G19360	0.0130758	0	0.0268235	0.0316436	0	0.0261386	0.0460432	0.0215324	0.027253
EPlOSAG00000052792	0	0	0	0	0	0.375288	0	0	AT1G45160	2.97343	2.93006	2.89766	4.63012	4.46128	3.93584	8.12658	8.41357	7.77566
EPlOSAG00000052793	0	0	0	0	0	0	3.27278	0	AT1G45163	0.307197	0.451333	0.735213	0.743424	0.797194	0.955254	4.72753	5.36789	5.5846
OS11G0158500	11.765	9.87582	10.1508	30.8288	27.1376	21.1738	20.8428	17.5668	AT5G56530	1.10332	1.0538	1.06267	3.43526	3.37821	3.68489	4.5484	5.45066	5.5106
EPlOSAG00000050331	0.309865	0	0	0	0	0	0	0	AT5G11390	1.55417	1.20536	1.06606	1.72777	1.65611	1.69904	2.24606	2.39136	2.58129
EPlOSAG00000050332	0	0	0.323498	0	0	0	0	0	AT1G68550	3.59561	3.94294	3.4575	10.6899	6.67554	7.53864	8.27587	10.3734	9.64574
OS05G0206800	0.0600364	0.075813	0.0879511	0.386959	0.221691	0.252147	0.274436	0.0842834	AT1G65470	1.51878	1.49302	1.35764	3.92188	3.42829	2.88341	3.73466	4.11484	4.18235
OS08G0203350	0	0	0	0.0552798	0	0	0	0	AT2G44950	3.60947	3.59593	2.97242	4.5917	5.16711	4.79297	6.44629	6.30391	6.80468
OS01G0136900	0	0	0.0119129	0.0589651	0.144134	0.184427	0.111517	0.0456647	AT4G17770	4.54472	4.57436	3.29953	3.26124	2.90743	2.85979	4.03558	4.6726	4.75262
OS03G0675000	1.04938	0.713534	0.90661	1.04056	2.62303	1.28828	0.73798	0.679934	AT4G20870	10.0356	9.44048	8.40928	12.5877	12.058	13.0069	13.1411	14.4881	12.6547
OS03G0619800	1.52651	1.73958	1.74539	1.67982	0.843227	0.166795	0.340386	0.139383	AT5G59200	0.0492316	0.10015	0.0504966	0.138998	0.095819	0.180427	0.674168	0.864764	0.940595
OS01G0247900	1.8481	2.41516	1.09135	7.41021	5.04681	1.98558	2.52597	1.72966	AT4G37950	0	0	0	0	0	0.0107577	0	0	0.0112164
OS12G0407100	1.73809	2.32077	1.87142	3.08763	4.07181	1.98651	2.7259	3.18675	AT5G20500	13.774	12.7515	11.6564	22.9709	20.3059	18.9096	22.4356	27.6424	27.5207
OS03G0805100	40.4808	43.8286	40.2702	41.1114	39.9944	37.8053	32.2932	29.8867	AT5G24080	0	0.026874	0.0180668	0	0	0.035211	0	0	0
OS11G0154500	0.404195	0.406246	0.74117	0.212669	0.219311	0.595885	0.0969609	0.154405	AT1G49660	4.43331	4.12092	3.39411	9.00904	9.48724	6.40287	3.2616	4.47113	5.46005
OS07G0185700	4.82797	4.7571	4.58467	6.11058	5.41619	5.30429	6.20738	6.84821	AT1G49840	1.69281	2.29575	2.07392	2.47505	3.59671	3.12545	4.87077	4.83961	4.52053
OS03G0841150	0.0425979	0.0537919	0	0	0.314594	0	0.0556349	0.159472	AT1G03760	0.642254	0.712647	0.738608	1.60137	1.95457	1.38114	2.05595	2.35562	3.00174
OS08G0451700	14.1204	16.8945	15.3842	27.6875	29.3447	20.9083	21.0167	21.8721	AT2G30200	13.5979	11.6058	10.5251	23.6521	21.0254	20.4655	20.3203	22.7681	22.1253
OS01G0362400	29.5564	25.9675	22.7857	31.4127	23.1284	16.7448	18.3154	15.126	AT2G45023	1.30635	1.32874	0.83745	2.37105	1.87966	1.5855	1.5881	1.47896	2.04206
OS07G0543000	11.9077	11.7947	13.5029	13.172	15.1799	18.7898	20.6107	20.5215	AT2G40010	2.85904	1.94486	2.72705	5.48668	4.69972	4.27735	4.01843	4.48319	3.73856
EPlOSAG00000010049	0	0.551367	0	0	0	0	0	0	AT2G20740	3.00179	3.07345	2.36527	3.6322	2.57683	3.29836	6.20673	7.57844	6.83652
OS03G0186500	13.562	13.9167	12.8464	23.3394	22.1249	25.2371	31.2591	28.4792	ATCG00280	16392.8	17390.7	20202.4	14495	16814	14492.4	15266	14731.2	15564
EPlOSAG00000010040	0.696074	0	0.951741	0	0	0	0	0.260586	AT4G13460	4.60002	4.07949	3.86037	6.30209	5.38289	5.7187	5.85668	6.99596	7.30952
EPlOSAG00000030173	0.141262	0	0	0	0	0.237314	0	0	AT5G65660	0.767946	0.628694	0.710833	1.11053	1.39986	0.842452	3.42964	3.1461	2.14712
OS07G0529600	91.865	96.3889	77.0929	15.4264	32.3785	9.58056	9.09961	9.63627	AT5G43290	0.423943	0.646811	0.917989	0.170992	0.412559	0.470816	0.663474	0.853263	0.687244
OS08G0322600	2.75178	3.10068	2.30712	5.52554	5.3026	3.92589	4.24639	4.05729	AT4G36020	1.71869	1.80791	2.74223	5.01246	5.33498	3.45038	3.53463	3.10843	4.77623
OS01G0160700	0.0438193	0.086954	0.0366821	0	0	0.0630983	0	0	AT2G44830	2.02367	1.64146	1.93554	3.05824	3.23069	4.2331	3.66817	4.38703	4.13772
OS09G0284250	0.220133	0.025271	0.0390894	0.193479	0.118235	0.302576	0.104547	0.374593	AT3G06045	0.0851166	0	0.0873038	0	0	0	0	0	0
OS07G0250900	1.8932	1.79302	1.97504	2.04529	1.77948	3.03592	1.99494	2.05376	AT4G02110	0.864255	1.11767	1.04476	1.43418	1.79503	1.78936	3.1737	3.38519	3.18447
OS01G0736551	0.00968329	0	0.0283713	0.0702143	0.0143026	0	0.0252937	0	AT2G35520	5.10746	5.04548	3.84423	6.89146	5.23491	6.31691	9.18644	9.046	8.76886
OS10G0556801	30.36	34.1767	27.2541	52.423	49.5034	38.1643	41.941	32.5486	AT2G39960	10.2007	9.00292	7.4131	16.1344	14.0755	14.5619	14.604	14.9712	17.0657
OS05G0575000	67.4167	60.2505	77.5602	4.0255	3.43012	3.6649	7.26086	4.14934	AT5G17990	7.88378	7.57698	7.12963	10.6063	11.2955	10.8684	10.6034	10.9836	12.5168
OS05G0321900	0.0116223	0.161441	0.0567541	0.0187276	0.0171666	0	0	0	AT4G29480	24.9631	21.7252	19.4438	34.0699	33.1544	29.9878	26.8588	35.0284	35.2662
EPlOSAG00000002400	0	0	0	0.728393	0	0	0	0	AT1G06730	2.45129	2.37	1.98932	4.82396	3.63324	4.20014	4.47391	5.53374	5.12311
EPlOSAG00000002402	0	0.364814	0	0	0.64007	0	0	0	AT1G44780	0.930856	1.06308	1.20603	1.14611	1.5638	1.01201	4.04453	3.88598	4.47591
OS06G0507100	0.695594	0.0418279	1.00284	0	0	0.222585	0	0	AT1G09500	0.431798	0.524203	0.342886	0.353938	0.374116	0.542962	0.735714	0.642247	0.522564
OS02G0228300	53.645	71.2683	71.795	38.2176	39.9191	34.642	31.7316	27.6035	AT2G17700	3.2657	3.62808	3.49794	3.55784	3.85582	4.56491	7.85014	8.47345	7.45952
OS07G0663300	2.03842	2.221	2.04366	1.11909	1.199	0.893996	1.15444	1.41818	AT1G06737	1.15067	0.585192	0.295059	0.08702	0.167965	0.215644	0.590888	0.532927	0.449675
OS02G0566450	0	0.0862124	0	0.176015	0	0.137632	0.213999	0.153352	AT2G21240	3.92404	3.72003	3.7318	4.84033	5.33872	6.32107	12.2078	12.4376	13.459
OS08G0231100	1.37174	1.00431	1.19718	6.05495	5.67959	7.17081	6.17515	9.8336	AT5G02400	0.348602	0.23269	0.234649	0.118635	0.101772	0.0435538	0.03836	0.0358786	0.0227053
OS12G0405400	5.56035	8.07213	6.84565	10.2668	8.97068	8.37443	9.29946	10.5248	AT3G02450	11.842	10.0748	10.4451	20.6584	18.4746	20.2062	24.0964	27.3698	27.4254
OS09G0474800	12.9787	15.1535	14.72	17.245	20.4146	20.8366	18.7074	19.0335	AT3G57720	0.337119	0.336172	0.291542	0.599879	0.555783	0.614444	0.775874	0.707542	0.964405
OS05G0126100	3.24422	7.21567	5.17642	8.64808	5.97502	3.56615	4.3766	4.77313	AT1G62333	0	0.0488531	0	0	0	0.0480064	0	0	0.100106
EPlOSAG00000000800	0.136253	0	0	0	0	0	0	0	AT1G36050	4.35662	4.33027	4.53222	6.3529	5.76879	4.34207	6.75986	7.05158	7.48925
OS11G0128800	41.6298	31.6112	35.1199	27.3643	21.3433	21.293	21.6224	17.6456	AT2G02630	0.0523285	0	0	0	0.015277	0.0130757	0.0460656	0.0107714	0.0545325
OS04G0267250	1.40427	2.30151	1.48819	3.80339	6.26664	2.76067	1.756	1.95744	AT5G50430	3.50136	3.15666	2.85675	3.61081	2.81105	3.16161	6.02451	6.66675	7.00743
OS01G0763900	1.36938	1.5258	1.04238	8.37193	5.71098	2.63882	2.84053	1.84705	AT3G09755	0.247897	0	0.254267	0.149979	0	0.123888	0	0.102056	0
OS03G0584100	0	0.0861817	0.133307	0.659823	1.20965	2.12108	1.55985	2.29946	AT1G54400	0	0	0.0380524	0.0448903	0.0433234	0.148323	0	0.0305463	0
OS03G0149200	27.8909	31.162	23.8259	104.172	95.7314	62.6974	51.9289	36.883	AT2G24240	0.321425	0.248469	0.329684	0.248914	0.270253	0.38552	0.950731	0.973918	1.08528
OS03G0197050	0.781869	1.16364	1.2545	3.86959	4.82564	13.5573	12.2539	13.8512	AT1G05420	0.0258623	0.0263055	0.0265269	0.0938811	0.0604028	0.0516992	0.273205	0.319414	0.242565
OS01G0848900	4.83629	3.91535	4.46253	1.86457	1.64342	5.4082	3.44885	6.69234	ENSRNA049493907	0	0	0	0	0	0	0	0.257512	0
OS03G0274800	56.5119	48.3996	53.8266	24.2571	26.7352	30.3278	28.5242	28.4467	AT3G03675	0.0999882	0	0	0.120987	0.116764	0.299817	0.234723	0.246982	0
EPlOSAG00000017728	4.36628	2.20547	1.70572	7.03561	5.15935	1.46703	5.70257	9.80753	AT3G18535	0.428825	0.387709	0.452062	0.67743	0.973721	0.666732	1.21639	1.3829	1.12963
OS06G0184766	3.33225	3.69074	2.90898	9.77895	10.6412	8.72545	11.2814	10.6628	AT3G03670	0	0	0	0	0.0244432	0	0	0	0
OS08G0122400	0.113678	0	0	0	0	0.0477437	0	0	AT5G47635	0.0605785	0.123233	0	0	0.035371	0.0302743	0	0	0
OS05G0319100	16.1138	13.3628	15.14	2.13928	3.01836	8.68095	8.10878	6.26149	AT3G05630	0.450828	0.474097	0.587812	0.711932	0.633543	0.221484	0.636787	0.692064	0.645002
OS01G0890900	2.36199	3.03437	3.46594	0.923236	1.01036	0.638424	0.503965	0.262648	AT3G05635	0.0807713	0.0821553	0.0828468	0.586405	1.03755	0.322926	1.42209	0.598542	0.75756
EPlOSAG00000049341	0	0.288811	0.223368	0	0.675629	0.768447	0	0	AT5G56780	1.11561	1.057	1.17562	1.96012	1.9274	1.7566	2.13458	2.80601	2.61186
OS09G0311600	15.4787	20.3908	24.3086	0.587785	0.547773	0.306406	0.563761	0.432442	AT1G43780	0	0	0	0	0	0.0186692	0.0219238	0	0
EPlOSAG00000049344	0.192116	1.21301	2.06392	0	0	1.29099	0.501827	3.23648	AT1G53830	0.620595	0.34919	0.284412	0.0319543	0	0.0527906	0	0.0108719	0
OS12G0502000	140.521	117.303	127.924	128.393	114.198	92.9172	104.092	82.6406	AT1G72175	1.03587	1.41693	1.92347	1.81528	1.31394	1.30312	2.4946	2.39695	2.66152
OS01G0694400	16.5769	14.1402	18.0124	16.4513	19.5392	16.0452	19.5712	16.131	AT1G72170	7.54999	6.07949	5.203	11.1816	9.9647	11.7517	11.4465	15.1849	15.1213
OS05G0200400	20.5887	20.1461	22.4367	9.22747	10.8148	6.26311	8.86092	8.9588	AT5G10170	3.12466	2.53416	1.68013	1.06597	1.35025	1.59596	0.953249	0.974699	1.63531
OS03G0272400	12.7662	11.8715	10.1727	12.8245	11.4926	14.7166	14.6734	14.3644	AT5G64130	16.4108	14.1201	13.6033	31.9755	27.9935	23.0679	31.774	33.6783	34.7207
OS05G0326675	2.93949	3.2148	2.56324	8.16208	7.13287	3.74775	2.12522	0.982539	AT1G14500	0	0	0	0	0.0224674	0	0	0	0
OS12G0235700	8.69263	10.3541	7.84986	12.4919	13.511	5.54096	6.29044	6.0007	AT1G28350	4.09091	4.03653	4.07947	9.9847	8.60519	7.8982	9.01862	9.78112	10.3756
OS12G0270100	3.2687	3.71625	3.60965	3.31341	2.92679	2.29701	1.89737	1.68957	AT5G56555	0	0.14175	0.142943	0	0	0.139293	0	0	0.145232
OS03G0578900	0.0117287	0.0148108	0	0.0377981	0.0173238	0.0394075	0	0.0439083	AT3G16490	0	0.052611	0.123792	0.354662	0.664431	0.396361	1.53804	1.94488	1.85068
OS04G0619600	18.8121	18.9658	16.1756	10.4424	9.59624	5.9952	5.89753	4.10836	AT1G05280	0.0116994	0	0	0	0	0	0	0	0
OS01G0618700	2.58651	3.13727	2.52609	12.5582	16.1361	8.03296	6.73399	4.58669	AT1G08670	0	0	0	0.0279841	0	0	0	0	0
OS03G0558400	0.0353236	0.0669092	0.0431232	0.0782633	0.14348	0.0370889	0.0461344	0.0578549	AT1G08677	0	0.0874048	0	0	0	0	0	0	0
OS02G0712800	1.18116	1.04229	1.11188	2.99248	2.48031	0.609635	0.436775	0.359609	AT1G05287	0	0	0	0	0.0799223	0	0	0.0563513	0
EPlOSAG00000025855	0.343065	0.433217	0.335052	2.21119	1.52017	5.76335	1.34418	1.28432	AT5G35370	1.05162	1.19491	0.971751	0.836851	0.874022	0.880653	1.72363	1.53673	1.52046
EPlOSAG00000033465	0.234288	0.591711	0.228816	1.51008	1.38422	0	0.611984	0.438548	AT1G19150	64.0247	63.5208	54.4875	57.2767	58.1426	72.2525	60.1249	58.9482	66.2389
EPlOSAG00000033464	0	0	0	0	0	0.20689	0	0	AT4G30250	0.0123834	0.0881694	0.0762099	0.0749205	0.115689	0.198037	0.145351	0.122354	0.10324
OS09G0328800	3.54698	6.48332	7.06304	7.13872	6.78832	3.57063	4.6866	4.39178	AT1G27360	2.96779	2.80874	2.29816	4.07859	3.38538	3.25118	2.52609	2.57305	2.3452
OS12G0207200	2.22109	2.41578	2.23255	1.67192	1.79598	1.82482	2.03272	1.30491	AT2G21030	0	0	0.059779	0	0	0	0	0	0
OS05G0530600	0.022057	0.0557064	0.0215418	0.0710831	0	0.0370548	0.057615	0.0619304	AT5G57785	1.61955	1.85582	1.28267	2.40618	1.91521	1.00404	2.14158	1.80612	2.54233
OS08G0528000	0.195042	0.061574	0.0714323	0.288091	0.120036	0.245747	0.0212279	0.0152119	AT1G04773	0	0	0	0.087842	0.0423879	0.0725603	0	0	0
OS09G0103200	6.0234	7.04077	5.70262	7.37131	6.67909	8.11294	6.22696	5.42372	AT2G25590	2.11157	1.56389	1.87144	2.92711	2.03491	2.29494	5.6788	5.94163	6.32378
OS12G0176300	4.61578	4.68662	4.20338	11.2067	10.6412	7.28278	5.01012	5.48754	AT5G57780	7.12867	7.53366	6.22286	5.96463	4.81179	4.06791	6.79474	6.14012	8.11387
OS06G0130000	11.5503	11.1994	12.6538	11.3294	11.9966	9.42501	9.64515	11.2457	AT1G04770	5.27882	4.13349	5.32852	10.6964	7.36312	12.7509	6.0731	9.22752	9.71435
OS03G0174200	2.77673	1.5584	2.41055	10.1341	6.43246	7.23641	5.48631	2.95417	AT5G22430	0	0.0288279	0	0	0.0661949	0.0283283	0.0332669	0.163353	0.0295361
OS07G0275300	11.4645	9.84883	10.7725	9.65647	10.6219	8.92955	7.91761	8.71386	AT1G04778	0	0.0322615	0	0	0	0	0	0	0
OS09G0433600	31.3367	22.7083	30.5647	30.7587	21.6605	36.4037	28.4618	13.0349	AT3G23280	2.46821	2.90404	3.16112	3.74531	3.48994	3.54714	16.4585	18.4441	18.2833
OS09G0123100	16.4826	17.5616	17.5582	18.3825	16.8314	15.5147	15.3169	14.3317	AT2G30970	14.3693	15.3144	12.0997	21.526	18.1458	18.5847	19.3025	19.787	23.2312
OS07G0646000	10.2069	10.0017	8.88647	14.2439	14.8672	12.0783	11.853	11.6046	AT4G03240	3.04393	3.57652	2.853	4.54049	4.44329	4.77348	5.20525	5.57432	5.90675
OS02G0753300	68.0439	69.562	64.6138	45.3479	53.5894	34.3617	27.441	33.1546	AT5G52370	4.44021	3.44408	3.17819	7.45995	6.90113	7.02422	7.16143	8.07463	9.05473
OS07G0674750	0	0	0	0.0948137	0	0	0	0.110141	AT5G42650	23.0185	20.0605	21.6549	9.38565	9.66088	13.8387	13.9984	14.6042	14.07
OS05G0163100	13.2405	11.4165	11.9468	15.8967	14.098	11.4937	9.53391	9.71917	AT5G63870	4.40683	5.28607	4.48889	6.74813	6.79651	6.25765	7.27722	9.29634	8.89983
EPlOSAG00000039201	0	0	0.169035	0	0.511287	0	0	0.323972	AT2G15860	2.68019	2.53292	2.69494	4.53262	4.36208	4.57728	5.66011	6.1512	6.88372
EPlOSAG00000039202	0	0	0	0	0	0	0.319635	0	AT1G62590	1.43482	1.47178	1.32203	2.13341	1.70395	2.13902	2.71174	2.98351	3.15525
EPlOSAG00000039205	0	0	0	0	0	0	0.264119	0	AT1G15385	0	0	0	0	0	0	0	0	0.0447045
OS05G0137800	2.79442	3.20795	2.57408	10.2848	10.0373	7.04177	6.92604	9.68865	AT3G49180	1.69219	1.26824	1.37026	4.07357	4.3058	3.88121	4.26513	4.81053	6.1257
OS08G0473900	0.58032	0.398551	1.04404	0.360915	0.135341	0.0342075	0.0930786	0	AT1G61165	0	0	0	0.147265	0	0	0	0	0.126831
OS12G0430000	16.9835	16.8027	15.6598	33.8234	32.3978	22.3823	21.0678	19.6083	ATMG00510	48.6186	53.2841	63.9064	67.0958	62.1563	56.6937	78.5927	88.9206	70.4646
EPlOSAG00000005873	0	0	0.24055	0	0	0	0	0	AT1G64990	2.87199	2.74339	2.57437	4.45725	4.2725	3.61942	6.30234	6.54923	5.99893
OS04G0602200	18.8161	15.7463	15.101	27.6033	25.1755	20.5148	21.632	20.9906	AT5G26622	1.67095	1.84578	2.02717	3.71762	3.33608	2.62191	6.62196	7.48557	5.2427
OS01G0358551	0	0.050542	0.0390894	0.193479	0.118235	0	0	0	AT3G58840	0.607657	0.764455	0.885703	0.928765	1.62463	0.767189	1.16371	0.961155	1.18318
OS07G0592300	8.27059	7.9148	8.69107	14.8076	12.8773	13.4588	13.1201	11.3499	AT3G47520	17.409	15.9854	15.7053	28.2499	24.9771	25.0653	24.2153	26.8582	26.3577
OS01G0720700	17.1086	17.9439	19.7621	18.1344	15.0277	15.9464	15.3666	12.3416	AT5G05420	1.05844	1.39322	1.46881	0.602694	0.145414	0.995688	0.146159	0.307584	0.71372
OS03G0757950	2.23052	1.39156	3.42322	4.79219	1.80417	1.80667	1.05775	0.546745	AT2G12480	0.0140307	0	0.0143912	0.0848864	0.0655388	0.0701189	0	0.0346574	0.0731083
EPlOSAG00000018255	0.573482	0.362092	0	5.08244	4.65881	3.37199	1.12349	1.61019	AT5G05425	0	0.181177	0	0.215533	0.20801	0.267056	1.25445	1.75995	1.67065
EPlOSAG00000018250	0	0	0	0	0.5457	0	0	0	AT3G53670	2.93453	2.94819	2.91761	4.20433	4.43601	4.87647	7.88201	10.7024	10.2626
OS08G0197400	0.969486	0.737049	0.656991	0.924556	1.0959	0.614916	0.568496	0.277762	ATCG01250	94.8746	88.2462	113.441	131.295	133.289	118.655	143.739	134.864	113.484
OS06G0126050	0.0688281	0.0434575	0.151246	0.221812	0	0.0578142	0.0898928	0.0644173	AT1G01050	21.2173	19.7023	18.8735	28.2433	23.7526	23.5837	20.0532	21.8229	20.4509
OS05G0125200	31.4171	37.1783	32.2461	37.2862	37.5713	17.7775	15.7408	16.669	AT5G00990	0.0480301	0	0	0	0	0	0	0	0.150159
OS03G0593200	17.8144	20.7608	21.0599	26.0787	26.7828	20.3038	19.8298	22.55	AT5G50200	2.94536	2.35089	2.05599	2.32644	2.67518	1.26752	1.12837	1.5157	0.575515
OS04G0193200	0	0	0.0229937	0	0	0	0	0	AT3G05090	4.90665	4.65599	5.20919	5.38502	6.02684	6.1602	7.39216	7.61194	7.15553
OS10G0167300	118.879	84.9547	159.018	198.911	141.951	129.647	118.568	79.7461	AT3G27610	1.23829	1.18628	1.13719	1.58546	1.41242	1.32403	2.45059	2.86903	2.68593
OS02G0804000	0.239504	0.237633	0.61819	4.35544	3.63865	6.26527	4.04411	1.7292	AT3G22220	1.70595	1.89372	1.98072	2.66148	2.7506	2.96014	4.0149	4.03563	4.72878
OS03G0132300	5.36168	5.88269	5.57981	4.95712	3.72788	3.81813	3.39471	3.6431	AT1G66170	0.0215606	0	0	0.0260885	0	0	0	0.00887618	0
OS02G0155600	0	0.0482789	0	0	0.0141176	0	0	0	AT1G66173	0.126957	0.0368951	0.0744113	0.0438914	0.0423594	0	0	0.0597331	0.0756028
OS09G0528100	19.1783	15.9628	16.2872	25.3135	20.3463	15.9693	12.5021	8.17861	AT1G76410	0.108784	0.027662	0.0278948	0.13163	0.190553	0.244643	0.191529	0.179139	0.623513
OS07G0694600	10.5268	9.09352	10.2309	12.0158	9.63513	8.55217	8.60322	6.24887	AT5G62470	4.94637	4.80175	3.57765	4.25692	4.67016	4.31279	5.08231	3.23092	3.25891
OS10G0557366	0.215558	0.340255	0.421047	1.51961	1.27356	0.860057	0.246338	0.151308	AT3G22886	9.74523	6.93855	8.99609	16.0369	18.6636	11.4937	10.981	15.5664	18.4834
OS05G0470650	1.66943	3.04507	2.92442	3.24511	3.13119	2.0923	1.86887	2.97608	AT2G04530	3.83236	3.11127	2.36211	10.104	8.54009	8.18807	10.3996	12.4336	12.476
EPlOSAG00000047758	0.325621	1.64476	0.63603	7.34565	12.9858	2.73515	1.70111	1.21901	AT3G22880	0.763523	1.20021	1.24591	3.80047	4.05283	4.47482	9.18594	9.7014	9.38544
EPlOSAG00000047759	1.62811	3.28951	1.27206	0	0	0	0	0	AT3G04940	7.50023	7.51656	6.43235	13.4224	14.6467	12.6937	16.3862	16.8139	18.9656
OS10G0327300	4.82899	5.38676	3.62627	7.84841	8.76557	4.60818	4.18189	3.18221	AT3G01130	6.28883	6.57701	5.02803	10.2631	10.1874	8.9612	9.16069	12.4273	11.427
EPlOSAG00000047750	0.263173	0.332331	0	0	0.777436	0.44212	0.687434	0	AT1G36940	0.274027	0.192962	0.237828	0	0.0984623	0.126412	0.0742249	0.138847	0.131801
EPlOSAG00000047751	0.591128	0	0	0.952513	0.873121	0	0.38602	0	AT4G34370	2.37798	2.44051	2.5929	3.24029	2.75192	3.5545	6.18582	6.40304	6.16185
EPlOSAG00000047755	3.29342	5.89175	4.28866	1.76895	2.43226	0	3.94292	1.02746	AT1G04487	0	0	0	0	0	0	0	0.0410112	0
OS10G0514600	0.0103959	0	0	0.0167515	0	0	0	0	AT2G25620	1.91322	1.54828	1.7332	4.63004	4.38689	3.67102	3.27833	4.23144	4.29323
OS11G0696200	26.135	18.8073	16.3928	27.7939	25.0907	25.1004	24.7495	18.0139	AT1G04480	41.3596	38.6403	30.2058	95.9339	84.5228	84.3464	47.7395	60.3224	71.8134
OS04G0448800	2.93714	3.26021	2.3275	9.07816	7.25621	2.84467	3.16713	2.38696	AT1G04483	0.118488	0.120519	0	0.286744	0.415103	0	0	0	0.123479
OS10G0559866	0.318425	0.759526	0.449204	0.570105	1.30646	0.594379	0.36967	0.596038	AT1G59960	1.31156	1.37386	1.16456	2.51079	2.69746	1.40875	1.7922	1.75686	1.75441
OS11G0473275	0	0	0.0103548	0	0	0	0	0	AT5G04840	0.59699	0.410284	0.628881	1.56187	0.942095	0.99987	0.530275	1.0628	1.00887
OS01G0959000	11.0512	13.7685	11.6157	20.2649	18.8952	14.646	13.6902	9.45892	AT1G56710	0.043973	0	0	0.336983	0.410805	0.351611	0.258068	0.772397	0.916503
OS11G0576400	0.563123	0.744177	0.20464	0.358735	0.42555	0.682016	0.273661	0.416725	AT3G13677	1.14285	1.10837	0.654261	1.41502	1.98637	1.56732	1.5286	1.61938	2.40967
OS01G0807266	0	0	0	0.150032	0	0.208561	0	0	AT3G13670	9.22405	9.6854	9.21639	17.283	15.786	13.6504	21.5019	24.6667	24.4975
OS02G0215500	1.70736	3.21138	4.88727	0.297422	0.189328	0.249791	0.0267855	0.0287918	AT5G47330	0.136793	0.260881	0.385846	0.537942	0.579068	0.478538	1.70596	2.04144	1.71065
OS03G0673400	104.665	84.2456	139.214	3.27708	3.27214	0.610109	0.996064	0.271916	AT3G13672	0.0308097	0.12535	0.126405	0.13048	0.161904	0.0461917	0.108489	0.253678	0.144483
OS04G0668600	5.29062	4.87345	5.6123	7.34623	7.06278	7.56996	7.65756	8.57347	AT2G37310	0.116135	0.0944999	0.154855	0.74478	0.542478	0.510742	1.30861	1.96025	2.06955
OS08G0532600	0.352268	0.76611	0.611626	0.725301	1.36823	0.767142	0.979797	1.24551	AT5G14500	1.9325	1.98348	1.54968	2.65721	1.74383	2.26518	2.35076	2.89302	3.47854
OS04G0604200	0.22146	0.0233047	0.108143	0.0892123	0.408882	0.124014	0.482062	0.207268	AT2G15280	5.03477	5.03	4.84282	8.77265	8.44031	7.0452	7.9845	8.34623	9.2111
EPlOSAG00000001404	0.413154	0.521724	0.201752	1.66434	3.35635	1.38816	0.269799	0	AT1G74810	0.255298	0.326684	0.194282	2.272	1.99074	1.54749	2.23293	2.19698	1.85377
EPlOSAG00000001407	0.325621	1.23357	0.954045	0.52469	1.68335	1.09406	0.637915	0.304754	AT3G21750	2.41399	2.84598	2.43382	8.63011	8.1687	6.44329	7.0192	8.51511	8.50469
EPlOSAG00000001400	0.976863	3.08392	1.11305	5.2469	5.05004	2.46163	2.12638	3.04754	AT2G05665	0	0	0	0	0.156656	0.0670414	0	0.276135	0.279598
EPlOSAG00000001409	0	0	0	0	0	0.88424	0	0	AT1G73620	0.321378	0.30174	0.532489	1.10679	0.721725	0.790694	5.91943	8.85435	7.13625
OS07G0166500	0.34154	0.161734	0.667125	0.343963	0.50447	0.0717217	0.0557585	0	AT4G27630	0.741641	0.754349	0.902695	1.19652	1.39726	1.50232	1.70619	1.67724	1.8446
OS12G0536000	11.7724	9.22956	9.82162	9.55475	8.11671	10.5454	9.82945	9.14778	AT5G35410	0.918678	0.986331	1.2302	1.17337	1.26651	0.943731	1.70731	1.70193	1.71529
OS10G0159700	7.88431	9.59601	5.82983	37.194	21.0341	20.0562	17.2952	11.1353	AT5G23370	0.399953	0.355955	0.128197	0.725921	0.729774	0.349786	0.352085	0.493964	0.807548
OS03G0100800	3.47542	3.82752	3.21618	3.77319	4.06459	2.13442	2.1728	1.88763	AT5G03310	0.111374	0	0.114236	0	0	0	0.0653629	0	0
OS02G0656400	48.5489	41.9569	41.8499	7.44449	11.6008	9.63716	14.5821	7.2066	AT3G22430	1.25875	1.42526	1.4129	1.23572	1.69181	1.69729	2.77373	3.16791	2.46266
OS08G0524800	12.7755	11.9808	13.7469	28.7405	31.5188	22.8884	20.8954	24.3963	AT2G26240	2.98512	2.81716	2.2727	5.58561	5.03126	4.18326	5.70722	6.05596	7.37624
OS03G0131450	0	0	0	0.104021	0	0.0867601	0.0337249	0.0241673	AT5G15450	49.1674	46.4291	38.9055	42.3622	46.4044	53.0331	21.9288	22.4311	23.4373
OS02G0168850	0	0	0	0.0971952	0	0	0	0	AT5G58030	5.49595	4.7996	3.388	7.82569	7.13115	5.71519	8.4383	8.45618	10.4424
OS01G0127450	0.569979	1.43952	0.32745	3.9979	3.5161	1.63345	1.13852	0.753108	AT1G52000	1.16814	0.835734	0.548308	5.30646	7.75699	18.117	2.06828	2.72241	2.48626
EPlOSAG00000023868	2.20462	6.36332	7.07453	28.9267	28.3764	16.931	14.808	19.4543	AT1G47550	5.45066	4.98372	5.11209	7.99128	7.30365	7.34602	11.0762	10.8809	10.9147
OS01G0923400	3.47766	4.67233	4.23034	6.22	5.38626	6.76874	6.40061	5.39414	AT4G15040	0	0	0	0.0153516	0	0	0	0	0
EPlOSAG00000023865	0.944835	2.38625	1.23035	2.53743	2.32594	4.23276	4.936	4.12666	AT5G40140	0.543981	0.639371	0.657152	0.614341	0.677597	0.495383	1.13511	1.53281	1.5999
OS12G0614600	0.371134	0.510015	0.298501	1.31918	1.85414	1.90715	1.62523	0.96032	AT2G15130	0.134596	0.114086	0.0230092	0.190007	0.157178	0.156952	0.0526611	0.147764	0.233776
OS12G0104200	2.39132	2.78941	2.61255	2.31849	1.37691	1.87248	2.22328	3.11054	AT5G51550	10.8254	12.5813	16.5564	12.6318	15.4691	15.555	40.8787	45.4045	47.0088
EPlOSAG00000038551	0.681264	1.54852	2.79447	0	0	0	0	0	ATCG00700	231.272	220.105	241.186	300.306	338.128	290.424	342.729	261.055	366.085
EPlOSAG00000033939	0	0	0	0	0	0.22106	0	0	AT1G10990	0.283423	0.403591	0.406988	1.37178	0.761241	0.453253	2.79442	3.82714	3.13082
EPlOSAG00000033936	0	0	0	0.245688	0.450419	2.30534	0.597413	0.570808	AT5G03380	10.7387	12.4353	11.3813	8.82413	15.4626	9.93306	12.2689	10.7846	12.8153
OS05G0320500	0.544047	0.386445	0.431713	1.64372	2.31029	1.48521	1.11024	0.509181	AT3G58040	3.05005	2.97482	2.44274	4.42366	4.67178	4.41622	3.77618	4.56682	4.50653
OS02G0297900	0	0	0	0	0.03781	0.0860087	0.0501492	0	AT1G68862	1.69429	1.84082	1.81682	1.63077	1.07921	1.15463	1.55931	1.80719	1.46469
OS03G0368900	147.163	128.113	143.792	11.0886	7.0292	5.70089	8.31669	7.41489	AT4G12980	18.4813	15.3191	15.8019	12.7786	19.7951	28.8627	30.4962	27.6301	24.8563
OS05G0133900	6.0386	7.1739	6.96779	8.00171	7.23254	8.45868	7.96957	8.59349	AT3G63400	3.9514	3.76429	4.61357	8.21215	8.07178	7.87614	12.0962	11.8606	12.8994
OS08G0197300	0.415339	0.278981	0.29344	0.355988	0.274105	0.118766	0.15004	0.0165414	AT2G27190	4.13798	4.64215	3.68256	5.31993	4.7434	3.08675	5.69623	5.83714	6.78548
OS12G0569500	0.0186884	0	0	1.50568	3.67127	14.0025	10.4954	10.2496	AT4G03935	2.32363	2.26632	1.63243	5.50769	5.12959	4.83586	7.50962	9.35638	8.32599
OS01G0838200	0	0	0	0.238587	0	0	0	0	AT1G07273	0	0	0	0.170395	0	0	0.0826448	0.057974	0
OS06G0605750	3.31364	3.29111	4.39983	4.73949	5.60929	3.37759	4.08463	4.80873	AT1G07270	0.355887	0.50121	0.393111	0.910942	0.687332	0.752467	0.931846	1.34116	1.19822
OS12G0178200	3.813	2.96307	2.57811	3.85186	2.66435	2.26662	3.1029	1.64707	AT5G58784	0	0	0	0	0	0	0.0271689	0.0190586	0
EPlOSAG00000005936	4.52039	2.85414	3.3111	12.7469	16.692	19.9344	25.8293	14.8074	AT4G29930	0.0685707	0.0523092	0	0.114085	0.0300282	0.0428355	0	0.0352869	0.0178647
EPlOSAG00000005937	1.47782	0	2.4055	1.9844	3.638	0	0.643367	0.461038	AT2G22070	0.0562303	0.142985	0.134576	0.238138	0.284546	0.177975	0.869008	1.05715	1.14268
EPlOSAG00000005930	0	0	0	0.910491	0	0	0	0	AT5G58960	2.50176	2.60326	3.19278	5.02202	4.76594	4.54013	7.06374	7.8693	9.35926
OS04G0674500	0.402976	0.497037	0.668142	6.04033	4.09728	3.10153	2.52137	2.03486	AT1G60170	7.31817	7.18998	7.26554	11.7831	11.0978	11.243	13.2031	15.0337	16.0323
OS11G0506300	0	0	0	0	0	0.0261758	0	0	AT1G60690	3.9622	3.75289	3.78448	5.27627	5.58173	6.05562	6.52076	6.61102	7.10028
OS03G0104901	0.0293644	0.0648915	0	0.106462	0.17349	0.123327	0.0767026	0.10993	AT5G19170	0.208503	0.0848301	0.235246	1.5642	1.5096	1.7714	2.30047	2.64379	3.45483
OS09G0459700	0	0	0	0.0458957	0.126211	0	0.1116	0	AT1G11020	1.56591	1.44284	1.17155	1.69415	1.95771	2.39374	3.17865	3.36741	3.09095
EPlOSAG00000007390	0.270587	0	0	14.8243	26.3781	16.8192	13.0758	22.7921	AT4G28162	0.38229	0.361066	0.252073	0.346931	0.28699	0.300223	0.865379	0.595808	0.796784
OS11G0106550	0.0251956	0.0159083	0.0307588	0.0202995	0	0	0	0	AT4G26795	0.898525	0.674204	1.19357	1.6754	1.29009	1.89922	2.45508	2.5833	2.60956
EPlOSAG00000007399	0	0	0	0.672971	0	0	0	0	AT1G62900	0.0965198	0.0327245	0	0.11679	0.112713	0.0321574	0.075527	0.0794715	0.167642
OS06G0680500	27.0024	34.2581	29.9052	20.2103	20.3961	18.7915	22.7287	21.5924	AT1G56220	3.20235	4.49876	5.27309	3.54473	4.59487	6.24365	54.7971	58.3625	60.4742
OS06G0704900	5.00913	3.88238	4.62847	6.52483	5.44934	4.45951	3.60406	2.27388	AT4G36600	0.0196614	0	0.0201667	0	0	0	0.0230777	0	0
OS03G0245500	5.38956	6.99702	5.57416	1.46367	1.29695	0.0254332	0.197725	0.14169	AT3G18160	2.57342	2.41252	2.87806	4.03301	5.90172	5.17528	7.38763	6.80337	8.417
OS05G0207200	0.277854	0.367578	0.142143	0.383761	0.273602	0.0444556	0.103683	0.0247665	AT3G18165	6.32475	6.2074	6.1686	12.5402	11.5064	11.268	13.2064	14.5996	14.8243
OS11G0242400	14.3735	11.6858	15.0687	26.2792	22.8674	86.6276	82.9714	77.4214	AT2G19270	2.98854	3.82553	3.29471	6.46973	6.17268	5.50677	7.51674	9.40747	9.04663
OS12G0405300	4.69272	7.61745	6.70164	7.43629	7.65895	6.14135	6.45625	8.33103	AT2G05395	0.133153	0.135434	0.273148	0.322232	0.155492	0.266174	0.234433	0.328902	0.416283
OS03G0203000	6.03569	5.36347	6.96063	5.91165	5.76851	4.50654	4.19047	4.57819	AT3G05740	0.369429	0.66667	0.562272	1.21126	1.04373	0.964808	1.20294	1.49145	1.35367
OS09G0286600	1.28482	1.25197	1.30421	16.4483	11.6255	2.77029	6.35541	2.89733	AT5G17450	1.17674	0.816932	0.957917	0.406818	0.348994	0.466729	0.219238	0.476755	0.622883
OS06G0199050	0.61973	0.260862	0	0.832169	1.06793	0	0.269799	0	AT5G38560	2.28577	2.18488	2.81529	4.03208	3.6019	3.3398	4.60086	4.24025	3.40566
OS03G0581701	13.8978	8.46525	9.58105	10.9336	8.93555	16.3434	17.1902	13.3132	AT5G12040	7.03185	7.55466	6.29595	9.44811	9.7342	8.90263	11.0393	11.9777	11.5264
OS07G0622400	2.1449	2.05476	1.66139	0.238358	0.163868	0.124253	0.265644	0.484555	AT5G15920	1.60292	1.66939	1.65198	4.1111	3.96761	3.42657	3.33077	3.95939	4.0522
OS06G0604400	16.5597	16.837	14.8838	25.7579	25.064	22.2967	22.5854	21.9837	AT5G18190	5.7376	5.51085	5.76306	7.06845	7.84586	7.27246	9.14222	9.95624	9.90606
OS01G0838600	0	0.0972351	0.0564015	0.403243	0.710832	1.64931	1.2068	0.576528	AT5G05990	3.72158	2.63827	2.97858	6.14065	6.05801	6.70681	3.37544	3.71422	4.02523
OS05G0544600	0.230355	0.500329	0.332963	0	0.0136098	0.185754	0.0361026	0	AT2G22270	1.18554	1.22469	1.292	1.92762	1.83871	2.09218	2.73957	3.00466	3.26241
OS09G0281850	0.0178381	0	0.0348429	0	0	0.0899019	0	0	AT1G76690	1.82437	1.53217	1.08155	1.33665	1.13363	1.10412	1.27696	1.41944	1.34305
OS02G0689600	0	0	0	0.0475525	0	0	0	0	AT5G07390	0.0425583	0.00865751	0	0.0102992	0	0.00850746	0	0.00700825	0
OS12G0114000	3.20194	1.7541	3.86295	0.26556	0.034775	0.0791048	0.153746	0.528837	AT5G03660	5.31643	5.52545	5.26618	7.51512	8.02643	6.14151	9.13673	10.5685	12.7722
EPlOSAG00000022762	0	0.713534	0.55185	0	0.8346	0	0	0	AT1G09920	7.01895	5.74484	5.287	7.09962	8.06849	7.83762	10.6843	11.2875	11.029
OS02G0527300	2.31901	2.18959	2.31679	1.76553	2.62395	0.714834	0.736346	1.15489	AT1G09927	0.0793417	0.121052	0.0813805	0.192009	0.185307	0.198257	0.325947	1.1759	0.496101
OS01G0299400	9.11368	7.13534	6.44418	12.6294	12.169	8.14525	9.71277	6.68723	AT5G57900	1.97667	1.843	1.35164	2.07858	1.92359	2.77538	3.34209	3.60382	3.5313
OS07G0516650	0	0	0	0.154894	0	0.0461398	0	0.0514095	AT3G56730	0.274242	0.21457	0.0432753	0.204207	0.344888	0.274107	0.49522	0.6253	0.439682
OS12G0106300	10.1538	9.80591	8.17973	67.6948	69.5512	30.0339	37.5019	33.3287	AT4G18040	10.0692	11.2158	8.78438	23.1758	21.568	20.1012	13.7779	17.7754	20.9296
EPlOSAG00000022760	2.07693	7.21248	4.56395	7.53	5.36851	1.74458	1.35629	1.94383	AT3G04290	10.9978	11.7595	10.7374	64.0784	57.6139	57.9832	106.778	84.3941	79.0883
OS05G0156700	4.95218	4.41295	4.47634	25.8633	26.5089	13.2757	13.3255	7.29737	AT3G09070	0.658899	0.370104	0.363133	1.32086	0.987647	0.884652	1.09659	1.4899	1.47579
OS02G0666700	35.7265	32.5204	43.3048	6.50019	5.92547	4.3058	4.14793	3.29572	AT1G67990	0	0	0	0	0	0	0	0.0257812	0
OS02G0189700	3.66842	3.98045	4.85659	4.59753	4.45514	3.24117	3.47801	3.81481	AT5G66310	3.01053	3.05601	2.78033	3.55569	4.07588	3.2608	3.06904	3.07131	2.89984
EPlOSAG00000022767	0	0	0	0	1.62151	0	0	0	AT1G74205	0.356587	0.0518139	0.05225	0.554752	0.23795	0.254579	0.53813	1.00664	0.477779
EPlOSAG00000012174	0	0	0.119509	0	0	0	0	0	AT4G05540	0	0	0	0	0	0	0	0.00952519	0
EPlOSAG00000012177	0	0	0.264266	0.43601	0	0.454574	0	1.51948	AT4G13930	75.1905	57.6221	45.2926	125.49	135.046	107.405	54.9826	58.4926	62.4645
OS12G0163500	22.9664	19.3252	21.4036	16.5808	17.1552	18.427	22.8324	18.0112	AT2G28330	0.794198	0.403903	0.434457	2.75483	2.47319	1.53469	1.46044	2.13614	2.62089
OS07G0501700	0	0	0.0194636	0.289015	0.677031	0.502201	0.104113	0.67147	AT3G54390	1.32225	0.817156	0.532189	1.2759	0.859998	0.869911	0.510783	0.744174	0.854671
OS08G0441100	15.1033	19.3061	19.3384	16.9841	24.2978	14.1998	9.32403	8.76173	AT1G07920	58.9183	54.524	52.2806	75.6008	79.9268	73.8503	61.7473	67.3202	73.3631
OS02G0275300	0.222744	0.281277	0.217541	0.179459	0.164501	0.0935501	1.0182	0.208469	AT5G22650	20.6845	16.7849	16.2082	45.822	52.9281	41.9783	30.0503	36.814	38.6799
OS11G0448000	5.42519	5.33802	7.28691	15.2033	14.4403	13.1289	12.0714	12.7461	AT3G05210	2.70463	2.85736	2.83543	3.94162	4.22283	3.47993	4.41984	5.00747	4.53147
OS08G0440850	0.15068	0	0.3679	2.18518	1.6692	7.97377	3.93589	5.64093	AT5G46360	0	0.0468454	0	0	0	0.0230168	0	0	0.0239981
OS03G0395200	0	0	0	0.439102	0	0	0	0	AT1G73310	1.64041	1.35285	1.83415	3.0042	3.22724	2.42248	3.12234	3.96682	3.06479
OS07G0194100	0.844242	0.845075	0.713915	0.431336	0.638697	0.657257	0.605096	0.501063	AT4G27980	0	0.050639	0.0127663	0.0301207	0	0.037321	0.0146091	0.0204961	0.0259414
OS07G0150700	67.703	53.8445	79.0304	16.1086	15.8614	14.7976	13.1361	11.4672	AT3G48100	0.463739	0.415083	0.361498	0.606019	0.519881	0.278106	0.348362	0.183278	0.309294
OS02G0664700	13.4495	15.1431	12.3295	18.7247	17.5093	13.7924	12.2134	11.5322	AT5G58250	43.8567	37.0277	41.284	78.9358	64.6879	66.3256	107.748	105.381	90.7855
OS07G0120800	1.86901	2.55912	2.6319	2.43381	2.39948	2.50093	2.72485	3.17302	AT5G60360	28.1405	26.7633	29.294	23.1535	26.5974	25.8053	31.2537	31.2759	36.8993
OS05G0131500	0.518969	0.989201	0.51641	15.5572	14.6221	2.86229	2.12292	2.12613	AT3G07925	0.213467	0.26055	0.306533	0.103319	0.0997126	0.384051	0.200446	0.175762	0.355933
OS02G0749800	2.32217	2.90657	1.91825	8.22544	6.02886	5.58536	4.62279	6.20412	AT5G02620	3.36355	3.4447	2.84535	2.83916	2.82105	3.01531	6.89201	5.88151	5.66135
OS02G0129700	15.3204	17.601	15.3675	19.7355	17.5566	19.4327	22.4808	25.4732	AT3G61770	8.7744	7.2176	7.62701	11.9539	10.5691	12.8472	10.3489	10.5832	11.3359
OS07G0675200	0	0	0.0202186	0	0	0	0	0	AT3G07920	0.0624057	0.0317375	0	0	0	0	0	0	0
OS05G0357100	4.54898	4.2754	4.33251	3.16141	3.16718	4.75444	4.97745	3.93247	AT2G47760	1.80938	2.08838	2.25074	2.81046	2.90717	2.7961	4.39815	4.83917	4.01189
OS03G0131950	0.224206	0.265428	0.383195	1.37736	0.972787	0.776854	1.2262	0.94427	AT5G13310	1.09834	0.850565	1.08816	2.03881	1.67614	1.93362	2.34397	2.80551	2.2762
OS10G0199500	0.0141055	0.0178122	0.013776	0.0227288	0.145841	0.0236966	0.110534	0.105612	AT4G15470	15.7892	15.6105	15.0171	21.1626	17.4325	16.9512	19.7768	21.7642	19.676
OS04G0642100	4.68142	3.12968	3.36973	7.85663	9.47476	5.82361	5.86028	4.154	AT2G45720	0.934381	1.04737	0.79214	2.00741	1.28043	1.86784	2.62993	3.24223	3.15968
OS04G0340550	0.0209849	0.211995	0.727562	0	0.0154978	0.0176269	0.0137036	0	AT4G15475	3.54642	3.81405	2.85528	3.98359	3.84454	4.43401	6.43044	6.44706	6.51731
OS08G0167800	0.46098	0.660783	0.255526	21.1196	12.0903	16.7862	14.9539	23.7641	AT3G22600	0.62772	0.889996	0.117064	0.115083	0.0888528	0.0760498	0	0.062648	0
OS04G0209300	6.73781	6.16883	7.89877	1.66407	2.60512	5.09431	5.69821	6.96485	AT3G50670	7.44866	7.52565	8.08948	11.9289	11.3381	11.5358	15.4403	18.0383	16.9258
OS04G0692750	14.7407	14.925	14.9801	16.2273	13.9921	14.0551	13.9043	12.0146	AT5G04435	0	0	0	0	0	0	0	0.0882313	0.111672
OS11G0247350	0.837022	0.201329	0.54498	4.36733	2.00166	0.602641	0.520567	0.298431	AT1G74340	5.12167	4.29205	4.2621	7.13272	5.45434	6.79334	6.08721	6.84273	6.14304
OS03G0419100	38.464	37.6238	41.1167	38.521	37.735	41.0272	38.3635	38.9831	AT5G59505	0.860699	0	0	0	0.251276	0	0	0.177168	0.672713
OS09G0133600	69.1342	59.2119	84.1173	36.1409	37.8352	110.401	117.213	95.4924	AT2G27310	0.0684834	0.0522426	0.0702431	0.124298	0.0799732	0.136899	0.221052	0.197355	0.285471
OS03G0290300	51.6541	54.5914	51.1237	203.124	196.419	373.567	381.393	415.045	AT2G27313	0	0	0	0	0	0	0	0	0.137401
EPlOSAG00000023664	1.53693	1.45561	0.750516	4.95307	3.9727	3.87297	3.51279	1.43844	AT3G01513	0.0309871	0.0315181	0.0635668	0	0	0	0	0.0255139	0
OS09G0369500	0.0111566	0	0.043584	0	0.0164788	0.0187426	0.014571	0	AT1G70660	0.401907	0.22012	0.221972	0.52372	0.433234	0.247205	0.181439	0.330918	0.289963
OS07G0507700	40.376	43.5776	44.8462	35.2743	39.7192	41.204	42.2458	48.4669	AT5G25380	0.0690016	0.0421104	0.11324	0.200383	0.048347	0.0965547	0.27537	0.318158	0.316395
OS11G0120725	1.15902	0.842675	1.13195	1.69781	0.622517	0.0590032	0.412837	0	AT3G04740	4.8422	4.32789	4.37913	6.40659	6.26728	6.05218	8.62703	9.42436	8.10595
EPlOSAG00000023667	0	0	0.781787	0	0	0	0	0	AT3G01515	0	0	0	0.0705975	0.2044	0	0.0684822	0	0
OS09G0560700	4.69052	3.63335	3.27838	4.39479	3.03243	2.99586	3.11195	2.41236	AT1G77120	0.0674529	0.137217	0.172965	1.08145	0.649851	0.809036	0.0989665	0.152731	0.140588
EPlOSAG00000007173	2.88175	2.72927	1.87629	4.6435	4.96587	6.85839	6.27283	6.29316	AT1G77122	3.24783	4.20888	4.5651	6.75362	7.05168	7.95927	12.1989	12.7568	13.1875
EPlOSAG00000034463	0.355771	0.449262	0	0	0	0	0	0.665943	AT1G24620	0	0.050429	0	0.0599916	0	0.049555	0	0	0
EPlOSAG00000034460	0	0	0.11654	0	0	0	0	0	ATCG01180	0.162721	0.0389434	0.471254	0.011582	0.111777	0.0765369	0.0898799	0.102455	0.049875
OS01G0976300	12.683	10.9924	10.8098	3.65749	3.11069	2.0442	2.29214	2.36527	AT1G24625	2.65382	2.23725	2.23156	2.40113	3.01531	2.93927	5.44412	5.70876	6.40324
EPlOSAG00000040201	1.1859	2.09656	0.694922	2.102	1.4013	1.39459	1.85862	1.33189	AT5G46740	1.44454	1.34512	1.43992	3.24962	2.63725	2.56228	3.36718	3.84457	3.10617
OS02G0815800	1.85426	1.42423	0.970816	4.74361	2.23058	2.89028	2.34685	0.966115	AT2G09560	0	0	0	0	0	0.261006	0	0	0
OS10G0338500	7.2264	4.97074	4.47555	5.01744	5.38024	5.72458	3.22274	5.05872	AT3G21550	0.0548915	0.0837481	0	0.199258	0.544858	0.24689	0.0644292	0.11299	0.314619
OS04G0462800	1.78601	2.01152	1.93286	2.13897	3.13709	2.71659	2.175	0.903541	AT2G09565	0.120614	0.245361	0	0	0.14085	0	0.283142	0.0993097	0.251388
EPlOSAG00000043956	0	0	0.426429	1.7589	4.19197	0	1.71077	0.408647	AT5G49500	0.431731	0.717244	0.782324	0.539812	0.907496	0.632893	1.41889	1.56409	1.27476
EPlOSAG00000043959	0.436628	0	0	0	0	0	0.285129	1.22594	AT2G36350	0.409677	0.512857	0.533336	1.48714	1.61003	1.59065	3.46774	3.63911	3.40725
OS01G0816525	0	0.091118	0.0176177	0.116269	0.106578	0	0	0.0337661	AT5G44140	0	0	0	0	0.0718752	0.0307593	0.108365	0.0253387	0.128283
OS09G0507701	0.0585721	0	0	0.0943801	0	0	0	0	AT2G36355	0.151674	0.0514243	0.155571	0.244703	0.531363	0.480064	0.207699	0.353837	0.922031
EPlOSAG00000019820	2.0376	2.57305	0.568572	0	0	0.489012	0	0	AT2G22890	0.108106	0.307884	0.221768	0.444753	0.631219	0.669929	3.22301	4.21914	3.69524
OS07G0569166	0.542702	0.648765	1.42753	1.10768	0.9726	1.11837	0.510332	0.663686	AT5G53990	0.0152997	0.0155618	0.0156928	0.0185128	0	0	0.0179581	0	0
OS10G0195250	7.20986	2.94231	6.31154	97.8288	57.4671	646.16	608.278	721.605	AT4G04490	0.0474371	0.0120625	0.024328	0.330047	0.0276979	0.0711206	0	0.00976458	0.0247176
OS05G0589400	6.26646	5.37264	5.05712	18.8132	19.9244	38.5912	37.6908	42.937	AT4G06895	0	0	0	0	0	0	0.144157	0	0
OS04G0399800	0.242713	0.235764	0.200575	0.21059	0.606687	0.0313652	0	0.349475	AT5G37000	0.32587	0.484433	0.578499	0.788613	0.673269	1.07735	1.50055	1.59955	1.78941
OS09G0482500	0	0	0	0.134762	0.0352941	0	0.0936244	0.0223638	AT1G03350	6.1176	5.63907	5.11336	8.7903	8.75824	7.46685	7.62935	9.31127	10.9115
EPlOSAG00000041552	0	0	0.461383	0.76123	0.930374	0	0	0	AT3G18960	0.189988	0.110425	0.38974	3.21842	2.3771	1.9532	4.87412	5.98904	5.37401
EPlOSAG00000041553	0.474362	0.149754	1.04238	0.382181	0.700652	0.996135	0.154885	0.443962	AT1G15690	112.834	107.879	110.795	220.103	198.94	207.488	239.23	245.284	241.644
EPlOSAG00000041551	0	0	0	0.191091	0	0	0.154885	0	AT5G48990	1.59125	1.50852	1.39445	3.08443	2.7242	2.47063	3.75362	3.76521	3.52585
OS01G0268600	0.269879	0.301172	0.784597	0.0101133	0.111244	0.632632	0.639374	0.775375	AT5G21090	33.5901	30.8667	27.9482	44.7688	44.0263	40.5525	38.5051	40.2779	39.4182
OS02G0573601	0.110979	0	0	0	0	0.0207155	0	0	AT1G23070	0	0.0374507	0	0	0	0	0	0	0
OS01G0640000	0.0269071	0.101933	0.0788357	0.13007	0.0794858	0	0.0351419	0	AT1G74690	10.5876	9.98935	9.17321	14.6663	13.5187	14.1913	18.8952	20.4721	20.0063
OS04G0615600	0.124347	0.0785118	0.0303607	2.55468	2.11216	3.23792	2.07064	4.13143	AT2G02550	0	0	0	0	0.0400121	0	0	0.0282115	0
OS01G0904400	2.54872	1.99155	1.88408	6.3305	4.29841	6.89969	5.27206	2.36342	AT5G01620	1.8373	1.86878	2.178	2.20493	2.35659	2.61912	2.82825	3.06275	3.31146
EPlOSAG00000011582	0	0	0	0.23102	0	0	0	0	AT3G20600	0.780789	0.684628	1.10462	1.95468	1.50916	1.64154	2.11733	2.03948	2.02016
OS04G0671250	0.106288	0.100665	0.27249	0.085634	0	0	0.0867612	0	AT1G16520	1.38761	1.25671	1.46226	4.55406	3.66259	3.28683	4.28374	5.02395	5.36824
OS07G0644400	0	0	0	0.113394	0.0188987	0.021495	0.116976	0.07185	AT4G31990	28.2728	26.341	24.9251	44.8757	41.5357	38.7814	42.8606	44.7303	48.7409
OS04G0691500	32.4831	31.6981	31.7097	30.0616	30.6235	25.2717	21.8299	20.6548	AT1G12200	1.54782	1.67102	1.23944	0.788583	0.602504	1.13994	0.398414	0.547782	0.707464
OS02G0601000	2.04379	1.94558	1.50472	0.506656	0.743081	2.16574	1.84797	2.94279	AT4G00070	0.0220285	0.022406	0	0.0799643	0.0257244	0	0	0	0.0459127
OS07G0643400	216.512	203.57	166.302	67.4385	87.4556	30.0147	26.5698	24.1992	AT1G43860	1.7408	1.64415	1.93698	2.52954	2.57737	2.16715	2.61794	3.13539	2.82646
OS01G0897150	0	0.0157431	0	0.0401774	0.0184143	0	0	0	AT5G10100	0.0279448	0.0852708	0.229303	0.72699	1.35428	0.586551	0.147601	0.0805311	0.0728045
OS01G0725000	9.77304	7.5549	8.0205	10.1193	7.73902	8.98949	5.82391	9.39018	AT1G78090	0.0788764	0.0962735	0.129445	0.076353	0.110532	0.06307	0.0185163	0.129889	0.197277
EPlOSAG00000029280	0	0	0	0	0	0.204271	0	0.227601	AT4G37230	0.124522	0.31664	0.255444	0.376684	0.436243	0.373383	0.292318	0.25632	0.194651
EPlOSAG00000029281	0	0	0	0.21648	0	0	0	0	AT4G37235	0.0914858	0	0	0	0	0.0304803	0	0.0753267	0.0953392
EPlOSAG00000029283	0	0	0.159008	0	0	0	0	0	AT3G25070	2.77692	2.75056	1.96844	5.61189	5.87442	5.5511	8.22534	8.20003	8.1968
OS07G0578300	0.0314301	0	0	0	0	0	0	0	ATCG00810	922.678	973.55	1188.17	1498.84	1625.68	1379.36	1483.41	1539.36	1274.4
OS02G0750600	80.4342	75.7932	92.2377	70.2668	73.0209	82.721	84.7623	82.9687	AT5G07270	3.91977	3.84267	4.02049	5.35144	5.73682	5.58034	5.53918	5.99833	6.51698
OS02G0647900	53.1992	45.3587	37.0541	86.9138	99.645	64.2349	56.3364	45.6477	AT5G64816	3.08969	3.19875	2.63147	5.97501	4.89665	4.74254	5.95788	7.17759	7.99207
EPlOSAG00000045321	1.49701	2.52054	2.19307	6.03052	4.4223	3.35322	4.88792	2.33513	AT5G64810	0	0	0	0	0	0	0	0.046771	0
OS04G0155200	0.00911801	0.0115141	0.0178101	0.0293846	0.0942738	0.0153179	0.0714513	0.0853368	AT3G62150	2.63884	3.18886	3.84891	5.07516	2.89074	2.17174	3.95694	4.25081	3.39334
OS01G0254800	0.923743	1.24981	1.17067	1.98463	1.64054	1.53337	1.33571	1.74967	AT5G64813	3.15984	3.83604	3.18876	5.45765	4.93981	4.92845	6.5354	7.53239	8.17921
OS09G0572950	0.0410067	0	0.0600733	0.0330381	0	0	0.0267784	0	AT3G07215	1.54879	1.41936	1.60432	4.99129	3.9038	1.77793	2.53786	2.95449	3.38786
OS11G0209100	0.787273	1.06319	0.565984	1.53286	0.96903	0.936832	0.628354	0.266074	AT2G03390	13.0405	11.4294	10.351	15.5539	15.0277	16.4392	18.5994	19.3999	19.7655
OS03G0648300	21.2488	21.4688	22.3292	8.25861	8.33847	8.48282	7.65618	8.21443	AT3G59050	3.87821	2.89812	2.51661	6.17709	5.23748	4.89152	5.65138	6.92947	6.57097
OS11G0107600	1.83154	3.76451	2.43575	13.5946	10.1303	4.09163	5.06407	4.19423	AT3G07210	1.59056	1.80748	1.91271	3.70317	3.2921	3.66196	5.04713	5.0217	3.79522
OS09G0491822	2.47304	1.61077	2.26273	7.6343	7.30558	4.9418	3.8419	4.2393	AT1G17690	2.78629	3.29948	3.23338	8.33016	8.28877	6.35245	8.65349	9.2352	8.59437
OS09G0491820	0.635533	0.267514	0.866377	9.47262	9.95424	39.4148	34.6368	56.9526	AT5G01190	0.0417221	0.0707283	0.0285295	0.286077	0.162407	0.180707	0.114267	0.171764	0.289863
OS07G0554650	0	0	0	0	0	0.0261334	0	0.0582363	AT1G45332	1.82096	2.15031	1.94064	3.39642	3.39197	2.61911	3.17997	3.46672	4.14707
OS03G0187000	6.77834	5.19345	5.15096	9.6337	7.90265	3.74247	3.80473	2.06713	AT3G44300	0.262836	0.160404	0.197699	0.381641	0.347857	0.14011	0.020567	0	0.0365208
EPlOSAG00000037749	0	0	0	0	0	0	0.158806	0	AT2G31360	5.26378	5.24277	6.7448	5.97234	5.25315	6.38524	50.5822	56.947	67.3723
EPlOSAG00000037742	0.808911	0	0.592512	0	0	1.0192	0.264119	1.51414	AT1G78320	0.185923	0.315181	0.127134	0.224969	0.36186	0.464578	0.254599	0.127569	0.548969
EPlOSAG00000037746	0	0	0	0	0	0	0	0.32108	AT3G48810	0.748305	1.13633	1.10266	1.84917	1.50155	1.79083	2.30097	2.42982	2.61406
EPlOSAG00000037744	0	0	0	0	0	2.97921	0	4.42596	AT4G14700	0.0415716	0.0951389	0.1066	0.389841	0.230595	0.238919	0.231776	0.410746	0.33575
EPlOSAG00000037745	0	0	0	0	0	0.237314	0	0	AT5G50810	8.13428	7.14189	7.16265	13.3246	12.7251	12.6173	10.3583	12.163	12.9153
OS03G0707200	4.01414	3.90529	3.40173	5.56214	7.54397	12.5426	14.81	12.6594	AT4G21320	1.22992	1.25099	1.07539	1.80537	2.14262	1.55175	1.25429	0.879866	0.882495
OS06G0236300	2.92097	2.46606	2.72233	2.55507	3.74736	5.21556	4.53431	3.06183	AT4G21323	0.426229	0.532884	0.500938	0.6984	0.549588	0.55915	0.396062	0.365567	0.314629
EPlOSAG00000038023	0	0	0.11582	0	0	0	0.154885	0	AT4G21326	0.439132	0.498194	0.56302	0.541573	0.729765	0.498001	1.467	1.45323	1.27608
OS11G0591800	8.55261	2.98044	7.38618	0.122682	0.112456	0.0426351	0.0331457	0.237523	AT4G11490	0	0	0	0	0	0	0.0165203	0	0
OS06G0602800	31.7108	40.1338	39.5429	58.5853	56.7265	36.8812	39.3694	36.9608	AT5G24160	2.45375	2.29181	2.1659	1.68437	1.77711	2.15776	1.74467	2.04948	2.01617
OS07G0291200	3.6726	3.84457	3.15134	4.00961	4.16405	2.96409	2.75522	2.46799	AT5G51380	0.167819	0.217248	0.234725	0.904553	0.623557	0.564205	2.09514	2.47463	3.00489
OS02G0192100	15.729	15.5648	16.5585	17.4602	18.4662	17.2112	16.075	17.6586	AT1G22300	15.469	13.6864	11.8126	20.6521	21.5043	16.941	22.1357	25.766	33.1821
OS04G0493300	7.55557	7.36754	7.00827	8.01448	6.22487	4.61372	4.64471	4.40628	AT4G01670	0.046615	0.0711206	0.0717192	0.0564046	0.163307	0.069888	2.16123	2.30288	3.10902
OS01G0113900	0	0	0	0	0.0129454	0.927605	1.20191	1.16479	AT1G75560	5.91515	5.83363	4.96068	8.09286	7.93635	8.41011	9.22207	9.57787	11.0545
OS11G0455500	539.06	457.783	435.088	731.522	709.637	501.246	472.347	467.263	AT5G56170	18.1281	16.6068	17.5945	18.577	17.4803	16.4961	13.8618	16.1416	15.4456
EPlOSAG00000033110	0	0.882188	0.682287	0.562849	1.03187	0.586814	0	0	AT2G30010	14.2166	13.3286	12.2452	15.4928	16.375	14.2626	19.8377	18.4526	19.5638
EPlOSAG00000033117	0.472418	0.198854	0.768971	3.04492	2.09334	0.264547	2.67367	1.76857	AT1G17345	0.0653894	0.0443399	0.0223566	0.026374	0.0254534	0	0.102335	0.107679	0.0908581
EPlOSAG00000033116	0.145543	0.183789	0	0.23452	0	1.71154	0.760343	1.36216	AT3G13050	1.12121	1.0527	1.13739	1.14796	1.28055	1.3177	1.5185	1.72461	1.55364
OS07G0227600	16.994	18.8595	19.0281	29.4982	35.3285	37.3688	34.5782	42.2721	AT1G17340	3.2623	3.40552	3.49583	4.4876	3.75951	4.29897	6.0561	6.09317	5.91371
OS08G0178400	2.40146	1.78628	1.31726	0.689104	1.26333	0.88424	0.0859292	0.677346	AT1G05107	0	0.426133	0.42972	0.304163	0	0.251248	1.3769	1.31083	1.65908
OS03G0396000	0.201738	0.235155	0.0151558	0.525113	0.641793	0.0782103	0.141873	0.0290476	AT1G36390	11.0419	9.48105	9.13643	17.7353	17.7012	18.5682	19.7602	25.6249	26.7814
OS03G0712800	18.3378	11.2457	3.74003	0.144948	0.227771	0.107942	0.033567	0.168379	AT4G23870	1.63092	1.79484	1.20663	1.03524	0.780553	0.962037	0.596258	0.484307	0.947327
OS03G0816800	5.82872	6.35069	5.85698	1.83095	0.932412	1.23726	0.934398	1.45734	AT1G68740	1.81393	1.51034	0.856716	0.347097	0.423653	0.455368	0.316891	0.347335	0.474782
OS08G0546467	0.024196	0	0	0	0.0714771	0.0812966	0	0.181163	AT5G65140	0.771009	1.06705	0.5445	1.66704	2.06641	1.95816	0.78629	1.0407	1.10644
EPlOSAG00000002875	0	0	0	0	0.799336	0	0	0	AT1G63290	5.51948	5.70042	4.81211	10.4803	10.6351	8.61463	9.39385	10.4176	12.2782
EPlOSAG00000002877	0.259617	0	0.253553	5.43834	5.75198	1.74458	1.69536	1.45788	AT1G68960	0	0	0	0	0	0	0.0231794	0	0
OS01G0930000	6.14383	7.75832	5.30187	17.2331	17.9573	7.53624	11.2083	8.64036	AT1G38065	0	0	0	0	0	0.0147388	0.10385	0	0
OS11G0308100	18.1421	23.6666	20.4529	32.6582	36.4365	21.9629	23.5342	22.5712	AT1G63295	0	0.0324914	0	0.0386526	0	0	0.0749888	0.0789052	0.0332895
OS04G0497900	2.94806	2.09334	2.52914	5.41453	4.0897	3.80854	3.56943	4.4448	AT5G13295	0	0	0.0779322	0.0919363	0	0	0	0.125119	0
EPlOSAG00000039778	1.88581	3.86972	3.5684	4.74796	5.74492	4.3561	2.30902	1.98557	ATCG00320	123.217	111.279	121.909	212.865	243.636	204.17	184.302	185.548	255.677
OS01G0495900	22.6632	20.6407	20.7552	41.7471	33.9958	57.5364	52.757	63.5922	AT1G10300	0.0492391	0.0125207	0.0378783	0.11916	0.100625	0.0615185	0.101141	0.0912195	0.29505
EPlOSAG00000039771	8.89428	8.08672	8.45488	2.67527	2.45228	0	0.154885	0.887924	AT1G48230	4.44465	4.84959	5.18052	8.01821	7.28221	6.16559	10.4022	11.012	10.4006
EPlOSAG00000039772	0.213463	0	0.833906	1.37585	0.630587	0.358609	1.95155	1.59826	AT1G02405	0	0	0	0.0431637	0.0416571	0.0356546	0	0	0
EPlOSAG00000039774	0	0.638425	1.15211	1.0862	0.746748	0.566224	2.42109	1.89268	AT1G06380	1.62079	1.73203	1.40991	3.42584	3.2823	2.50175	2.31178	2.78726	3.0574
OS09G0361333	0	0	0.101696	0.167787	0	0	0.135996	0.19491	AT1G26300	1.52387	1.5283	1.18047	1.90837	1.51821	1.85331	2.20142	2.52697	2.25437
EPlOSAG00000014323	0.548904	4.15888	1.60825	1.76895	0	0.922136	2.15069	1.02746	AT1G02400	0.413245	0.25585	0.239575	0.217405	0.146871	0.0897915	0.021089	0.0295873	0.0374479
EPlOSAG00000042306	0.711542	0.599016	0.463281	1.33763	1.05098	0.796908	0.929308	0.221981	AT2G35190	3.07483	2.69224	3.59278	4.16168	4.27554	4.18224	6.23221	7.62127	7.2841
EPlOSAG00000042304	0.850073	0.214692	1.66043	0.821859	1.25559	1.42809	2.22047	0	AT5G13290	1.1303	1.12735	0.855442	2.7088	2.85774	3.37827	3.03982	3.9937	4.56298
EPlOSAG00000042305	0	0	0	0	0	0	0	0.922075	AT1G72690	0.339852	0.543204	0.248989	0.528717	0.510262	0.582316	0.569861	1.15927	1.41666
EPlOSAG00000042302	20.6217	29.6018	16.8694	27.8326	28.3764	11.5479	15.4231	7.918	AT4G38930	3.78747	3.44171	3.60872	5.83911	6.66806	6.39902	6.16061	6.60108	6.61173
OS09G0368900	0	0.0100498	0.00777253	0.0256476	0.0117549	0.0534793	0	0.0148968	AT2G17800	7.15773	6.11702	6.30096	9.2413	8.70331	10.1781	10.3719	11.7565	10.4391
OS06G0343000	2.98275	3.71521	3.21763	5.04657	4.86625	3.27986	2.99254	2.61396	AT3G47760	0	0	0	0	0	0	0.01072	0	0
OS09G0372100	1.76385	3.29087	1.45882	9.8324	12.0406	2.98989	3.61116	3.92626	AT1G18160	4.15262	3.80068	4.31718	4.73466	5.28568	5.14417	9.33455	9.36926	8.77995
OS02G0810100	13.2017	12.1683	13.5247	24.6416	28.1825	17.444	14.0364	18.6233	AT4G35570	7.7282	7.62034	7.33834	18.7024	18.9166	15.6849	20.3999	22.8685	24.4777
OS02G0657600	10.9659	10.8849	10.4607	7.99943	6.93088	6.65489	6.32834	5.28276	AT4G07855	0.0345718	0	0	0.0836644	0.0403721	0	0	0.113861	0.0360279
OS06G0104000	10.962	13.1614	9.77661	18.4001	17.9179	15.5835	14.5616	22.3564	AT4G31408	0.888981	1.1145	1.42075	0.975613	1.54512	1.59111	2.71781	2.94486	2.0683
OS01G0946800	0	0.0100581	0	0	0	0	0	0	AT5G10030	1.21361	1.29462	1.40672	0.776029	0.841119	0.986192	1.26235	1.35671	1.27501
EPlOSAG00000028056	3.89425	2.62272	3.80329	9.20334	7.28584	5.23375	8.4768	7.77534	AT5G63660	0.233886	0	0	0	0	0	0	0	0
OS08G0223833	14.1972	14.5625	14.2356	20.475	20.4288	17.6334	16.4966	14.7768	AT2G01820	10.557	9.9299	11.2927	18.5027	15.445	16.3715	22.5542	22.2769	21.8046
OS07G0439100	0.017339	0.0218954	0.0677361	0.0279392	0.051221	0	0	0	AT1G52590	11.1841	10.6081	9.36021	9.17417	9.73533	9.60128	5.79863	6.63817	5.82761
OS02G0272850	1.8259	2.15534	2.09338	0	0.351774	0.333417	0.414733	0.594396	AT3G25920	197.964	180.791	169.242	338.484	315.577	312.545	329.363	365.739	392.098
OS04G0641101	2.5343	1.03235	0.718579	1.05384	1.44901	3.02147	2.9896	3.21353	AT3G15510	0.954309	0.791462	0.617417	0.017765	0.0514347	0.0293489	0.0344654	0.0241769	0.0765004
OS03G0808350	6.60336	4.11719	8.36369	6.55045	4.63288	4.22935	3.18021	2.5107	AT4G31405	1.56377	1.51104	1.28316	1.37183	0.958719	1.8756	2.75322	3.34766	2.15927
OS06G0222800	2.30438	2.80335	2.43192	3.19632	2.78029	2.53831	2.11667	1.75381	AT5G65495	1.28475	0.969534	1.23275	1.85544	1.4035	1.78119	2.04307	1.77441	2.46178
OS04G0401700	12.6025	10.8992	16.1221	4.98925	7.24789	2.47409	1.36374	1.62688	AT4G32820	1.69471	1.87893	1.84822	2.87885	2.36426	2.38626	4.835	4.83458	4.56348
OS11G0203400	1.77298	2.52292	2.42936	2.94216	3.71317	1.51149	1.96998	1.63459	AT5G65490	2.33558	2.29897	2.51151	4.34547	5.07361	4.71906	6.91245	7.49575	8.02158
OS12G0635400	2.64013	6.01295	7.48213	0.41782	1.07935	1.10883	0.246295	0.220619	AT4G16410	71.4447	66.9446	59.674	99.0956	83.9862	88.8327	71.8482	80.4901	92.8866
EPlOSAG00000045654	0.259617	0.32784	0.253553	0.418334	0.76693	0.872291	0	0	AT5G44180	3.11061	3.19532	3.75171	5.17866	4.98759	4.84222	9.92787	9.97227	9.38463
OS12G0125000	13.9978	14.0606	11.3233	2.67703	4.25516	1.54396	1.52348	1.81955	AT3G15640	9.85689	10.2563	9.97073	11.7898	10.1346	11.596	13.6973	16.7168	15.7505
OS09G0474100	0.68382	0.676811	0.342948	2.78446	2.53873	1.81633	1.48448	1.02054	AT5G11920	0	0	0	0	0.0409689	0	0	0.0192574	0
OS01G0837000	11.5798	13.7899	13.5914	5.37453	4.17505	6.69555	4.62694	5.14987	AT4G16110	2.01777	1.81632	1.64535	2.78333	1.93216	2.48063	2.321	2.55851	2.55485
OS06G0133600	4.52776	4.89074	4.58528	22.965	28.397	11.0469	11.2447	11.9174	AT2G46570	0.197259	0.177034	0.297541	0.589693	0.501359	0.869831	0.558405	1.02227	1.01575
EPlOSAG00000009081	0.194057	0	0	0	0	0	0	0	AT2G31945	0.0322891	0.13137	0.0993565	0.0781404	0.150826	0.193639	0.113699	0.159515	0.134597
EPlOSAG00000009088	0	2.31049	0	0.737064	4.05377	0	0.597413	0	AT3G24030	5.83379	4.30978	3.81067	5.4614	4.80464	5.33989	4.43282	5.0309	4.8956
OS09G0565700	2.62448	3.83744	3.03534	4.41443	6.08673	2.16583	2.2701	2.71485	AT2G31940	0.105616	0.0358085	0	0.596383	0.246671	0.316691	0.123967	0.695688	0.733763
OS01G0153700	2.65396	3.60917	2.79135	8.05082	7.58609	5.05421	4.11172	4.48506	AT1G06960	2.6366	2.95175	2.5047	4.41077	3.88485	4.05022	4.65247	4.98286	5.12649
OS03G0556500	0	0.0605369	0.0585243	0.0193117	0.0531062	0.040268	0.109569	0.0673006	AT1G09713	0	0	0	0	0	0	0.0986572	0	0
OS03G0413100	15.5296	17.0799	16.7725	29.7526	29.1992	22.4485	24.7808	23.2195	AT1G09710	1.12165	1.23306	1.16209	1.24753	1.57444	1.52876	1.94156	2.30416	2.50308
OS04G0644050	0.0139013	0.0175544	0.0135766	0.112	0.0205329	0.070061	0.127091	0.0260209	AT3G61210	3.83208	3.92225	3.46086	0.904041	1.35094	1.71034	1.18813	1.23034	2.16
OS05G0215500	0.0254122	0.0320902	0.0124093	0.143318	0.0375349	0.213457	0.182543	0.428106	AT2G08420	0	0.136108	0	0.161918	0	0	0	0.330538	0.139451
OS08G0527300	0.213815	0.140001	0.0773409	0.740102	0.812927	0.286029	0.439564	0.333521	AT3G17730	0.110687	0.112583	0.136237	0.241077	0.206811	0.30977	0.103935	0.291635	0.415255
OS01G0899200	1.58893	1.71984	1.14875	13.4999	15.2398	18.6854	26.6006	24.8366	AT4G16970	0.832796	1.03996	1.16712	2.81356	2.80201	2.12629	3.71643	4.29071	3.55742
OS07G0653900	3.52203	3.06836	4.03903	0.247179	0.371585	0.0824651	0.0881522	0.0918836	AT1G72030	21.3618	21.5226	18.806	23.9992	27.2013	30.543	21.4191	21.8375	23.7937
EPlOSAG00000004531	66.7833	54.8742	55.3952	62.6504	72.2923	46.1068	33.4551	40.242	AT4G32790	2.3144	2.45306	2.04109	2.35552	2.08386	2.9186	3.19892	3.3838	3.1332
EPlOSAG00000004539	0	0	0	1.04348	0.318836	0.362638	0.56385	0	AT3G18750	10.336	9.22115	7.50863	10.9111	11.6738	12.2595	8.25107	8.65405	8.14418
OS01G0256500	1170.74	1158.46	1037.6	279.918	311.436	551.317	363.435	719.442	AT3G63090	0.822533	0.78643	0.691809	1.85121	1.55607	1.39762	1.50611	2.4381	2.7944
OS05G0499500	21.2777	19.9231	19.3394	12.4086	13.2569	12.351	11.8448	11.8028	AT5G14200	6.76362	7.39268	4.80283	0.381541	0.681213	1.57583	2.0356	2.76501	3.28602
OS01G0367450	0	0	0.045819	0	0	0	0	0	AT1G14315	0	0	0	0.0610037	0.0294372	0.050391	0.0591758	0.145288	0.131348
OS10G0118900	46.5371	50.7812	41.9945	44.443	43.2782	35.02	38.5464	30.4817	AT1G14310	4.2368	4.50401	4.37371	5.15965	6.03291	6.03788	6.16006	7.49455	7.54866
EPlOSAG00000032949	0.170015	0.429383	0.166043	0	0	0	0.222047	0	AT4G10710	6.11493	6.02655	5.71368	11.1676	10.6374	10.4649	14.0651	15.9385	14.3612
EPlOSAG00000032942	0.145543	0.551367	0.568572	0.23452	0.644919	0	0	0	AT2G40800	3.915	3.93509	3.13904	3.98259	3.65477	4.28244	4.69014	4.92557	5.0066
EPlOSAG00000032941	3.20194	4.58247	4.58648	8.25512	11.3506	9.68243	10.0365	4.79479	AT2G24030	0.14893	0.0302965	0.152757	0.288332	0.313051	0.372143	0.349616	0.44145	0.543212
OS11G0520950	0	0	0	0.0293567	0.0269098	0	0.0237945	0	AT5G56620	0	0.0157681	0.0159009	0.093791	0.0724137	0.0619795	0.145569	0.1787	0.129244
OS01G0179800	7.53096	10.2863	9.4565	6.45668	5.82122	19.6968	22.5822	26.0974	AT2G34240	0.0116135	0.0354375	0.0238238	0.0983671	0.0949336	0.0928621	0.449836	0.458986	0.580927
OS03G0701500	56.6044	60.6272	50.7892	62.2988	50.3654	25.3808	20.3567	18.9105	AT3G03820	4.63617	3.81568	2.8314	1.41316	2.14907	3.89105	3.82167	2.44772	3.76188
EPlOSAG00000033096	0.50557	2.76651	3.12715	1.90085	1.4935	1.69867	3.30149	4.10081	AT3G49680	17.7215	16.9952	14.5258	32.0071	30.7465	32.2358	29.2291	35.7899	36.1684
OS08G0430800	1.75225	2.65127	2.12759	3.89184	4.31359	4.29623	4.08224	4.84601	AT1G67140	4.3387	4.29578	4.71822	6.44957	6.03597	6.09192	9.82428	10.4291	9.15902
OS03G0850700	51.3863	43.3681	47.0798	60.7227	76.7777	68.1116	58.4066	56.8279	AT4G31420	2.31182	2.77307	2.56747	4.12847	3.94713	3.76083	4.22934	4.64713	6.13098
OS03G0320100	106.108	87.6728	144.22	15.9636	17.2553	8.76106	10.0821	6.82427	AT4G02320	0	0	0.0170507	0	0.0582376	0	0.0390239	0.0684365	0.0519711
EPlOSAG00000031158	0	0	0	0	0	0	0.309769	0	AT3G10760	6.20799	6.46341	5.86194	4.32005	5.18046	6.60439	5.75427	5.52829	4.5675
OS07G0123200	98.1929	99.8379	80.7552	73.5951	62.9992	23.0727	27.4058	17.9428	AT1G63870	0	0	0	0	0	0	0	0.00705513	0
EPlOSAG00000047064	1.37226	2.02168	0.670103	0.737064	0	1.53689	2.09094	7.70591	AT5G38660	18.8306	17.8	16.6234	21.5581	20.534	22.2434	20.4972	22.9657	22.6584
EPlOSAG00000004399	0	0	0	0	0.777436	0	0	0.492615	AT1G53290	2.73423	2.62484	3.16687	4.79539	4.30512	4.77487	5.9138	6.65267	6.21104
EPlOSAG00000004398	0	0	0	0.22271	0	0	0	0	AT4G04020	65.6585	65.9656	54.3344	26.3898	40.5314	46.6977	11.1527	12.6742	11.4069
EPlOSAG00000029326	0.124751	1.10273	0.487348	6.63357	5.15935	2.93407	2.1181	1.63459	AT5G45190	3.91549	3.93255	3.89501	6.77336	7.06541	6.32266	9.14546	9.72029	9.54487
EPlOSAG00000029325	0	0	0	0.18876	0	0	0.305992	0	AT1G65000	1.47623	1.20122	0.878213	1.25037	0.827472	1.32795	1.03964	2.09063	1.19996
EPlOSAG00000029329	0	0	0	0	0.280955	0	0.745287	0	AT4G03440	0.982213	0.535202	0.665638	0.891366	0.788565	0.990494	1.4308	1.34306	0.913914
EPlOSAG00000007848	0	0	0	0.476257	0	0.496535	0.38602	0	AT5G07152	1.04766	0.949554	1.17034	1.38064	1.48992	1.38928	3.0925	3.52731	3.39427
OS01G0546700	0.579246	0.866918	0.492382	0.967936	0.839726	1.04519	0.85459	0.642518	AT4G09265	0	0	0	0	0	0	0.0700007	0	0
OS04G0507032	0.0404456	0.102148	0.118502	0.195516	0.11948	0.203841	0.105648	0.227122	AT5G53550	3.40859	3.05275	3.23283	2.31396	2.19184	2.91136	3.01362	3.30223	4.14264
OS03G0810500	2.50454	2.35273	3.13212	0.738236	1.30829	0.769669	1.55574	2.17252	AT4G01010	0.182124	0.155996	0.206468	0.150781	0.0895494	0.143711	0.101259	0.039462	0.0899029
OS04G0491200	3.71933	3.24208	4.43331	2.23366	2.9703	1.42678	1.09647	1.49837	AT2G18910	5.5173	5.35931	5.71567	9.07935	7.6027	6.86566	6.54072	9.04013	8.48079
OS05G0417600	12.9288	14.3868	18.6265	9.85394	10.5587	7.22429	6.56459	7.84032	AT5G03455	7.56641	6.22755	4.93622	7.99078	8.02409	7.242	7.12372	9.02573	10.1977
OS03G0231850	0.15256	0.316497	0.478917	0.298505	0.402388	0.237988	0.426965	0.203976	AT5G08330	11.7347	12.1762	11.8111	6.72157	6.82214	12.1677	23.425	24.2036	24.4226
OS03G0645900	0.969908	0.847928	0.664899	0.495908	0.550998	0.391684	0.255785	0.418962	AT2G18915	2.5933	2.77779	2.71878	3.74884	3.71178	3.61277	4.79481	5.41369	5.15393
OS03G0594100	2.37247	1.62185	2.90067	0.0574869	0.0263476	0.0899019	0	0	AT2G18917	0	0	0	0	0.0377972	0	0.0379907	0	0.0337301
OS04G0524600	59.2532	54.7309	91.4923	6.58467	7.41125	5.02727	5.82119	5.41529	AT5G03450	2.1212	1.89864	2.05138	3.13868	3.43961	3.33168	4.45313	5.17972	5.29268
OS03G0243200	3.48371	4.10805	4.09031	5.10785	5.17397	3.51795	3.64661	3.63205	AT5G42380	0	0	0	0.0473733	0.0914395	0	0	0	0
OS11G0592000	23.9693	9.43632	39.1925	0.0416644	0.190958	0.434384	0	0	AT3G11320	1.76988	1.52745	1.7466	3.05012	1.83196	2.26487	3.41513	3.59901	2.87843
OS01G0211600	117.803	143.005	144.048	26.0126	24.6719	14.2873	13.0196	12.7257	AT5G45170	15.2982	13.7806	12.5804	14.2966	15.9383	16.1068	13.5553	14.9561	14.0322
OS10G0491100	8.95056	8.20409	6.18168	8.85118	6.42485	6.83907	7.72041	5.8978	AT1G70100	4.47939	5.29639	4.53141	5.64336	6.42793	6.07545	8.08508	8.36385	7.76586
OS01G0121950	0.0671736	0.0212064	0	0.02706	0.0248046	0	0.0877319	0	AT1G10030	3.14904	3.32054	2.63731	5.69808	5.63414	4.79342	5.59517	4.9002	5.901
OS06G0235300	17.8825	20.3829	19.4431	14.9078	15.6885	12.1786	13.2582	14.1562	AT4G08240	3.27821	3.36064	4.02435	4.49765	3.6775	3.6636	4.84765	5.33461	5.11099
OS09G0499000	40.5675	37.2309	41.8999	43.2446	41.6324	39.8859	32.3409	54.0871	AT4G23260	4.15015	4.92686	4.96834	1.38429	1.40703	0.681213	1.12853	1.33277	1.24295
OS04G0112100	0.0901109	0.147928	0.0792055	0.0871201	0.279505	1.92256	1.78888	1.83853	AT3G50100	0.776217	0.82624	0.85171	2.53374	3.24635	2.41772	3.00871	2.86858	2.91584
OS01G0692100	4.55647	4.09407	2.82406	1.41194	1.71488	2.61289	2.34605	2.25525	AT1G34150	1.33963	1.42315	1.43513	2.44946	2.72899	2.21674	3.56411	3.17423	3.45912
OS08G0128300	21.0976	22.8731	22.73	19.6693	19.1319	16.7293	14.5351	16.4288	AT2G48030	0.949453	1.24353	1.57417	1.3377	1.10875	1.42998	1.63347	2.27029	2.33129
OS10G0485500	8.90702	12.1861	10.1939	6.8455	8.8963	6.24252	5.40362	6.58176	AT3G51010	8.56193	8.45081	8.49306	15.1311	14.7345	13.7937	16.5951	17.4618	19.8409
OS02G0558300	25.812	28.2043	19.914	18.9444	13.6224	10.9398	8.50488	8.38353	AT5G54250	5.59681	4.93304	4.44123	8.27078	8.00417	8.77851	4.76051	5.67468	5.17245
EPlOSAG00000011210	0	0	0	0	0	0	0	0.492615	AT5G50030	0.0599039	0	0.0307216	0.108726	0.0349771	0	0.0351562	0.0246615	0.0936405
EPlOSAG00000011214	8.35289	11.6027	8.15778	28.2648	24.6751	16.839	17.4548	7.81759	AT3G48330	2.39507	2.84572	2.04356	2.975	3.41569	3.74972	4.92586	5.56705	6.4718
EPlOSAG00000011216	0	1.38629	0	1.76895	0	0	0.716895	0	AT3G47100	0.100174	0.0509455	0.102749	0.0606061	0	0.0500625	0	0.0412403	0
EPlOSAG00000031149	0	0	0	1.42003	0.260334	0.888296	0.230196	0.659834	AT1G08813	0	0	0	0	0	0.190664	0	0.157064	0
EPlOSAG00000031144	0.355771	0	0.231641	0.573272	1.4013	0.796908	1.08419	2.66377	AT1G08810	3.65568	3.21978	3.4773	5.09063	6.3439	4.34792	4.21896	4.32159	5.66128
EPlOSAG00000031145	0.835289	0.527395	1.63156	3.02837	3.39283	5.26219	0.818195	1.56352	AT4G36270	0.808273	0.733586	1.00761	0.993065	0.871275	1.09374	1.95581	2.12963	2.28074
EPlOSAG00000031142	0.768466	0.194081	1.80124	3.7148	3.63218	4.38937	1.60584	6.9045	AT2G32730	11.8233	12.1659	12.3938	23.7822	22.1929	21.8998	30.7265	34.2738	30.9068
OS02G0327000	21.9691	17.3418	26.5763	24.2626	23.0441	28.2519	23.4328	20.0688	AT1G71270	5.20303	5.10397	4.62219	6.99378	6.7878	7.62663	10.1572	11.0506	10.5948
OS07G0228000	2.90426	3.98609	2.89924	7.24688	7.04478	5.278	4.05157	5.40849	AT5G52940	0.0537937	0.0547154	0.09196	0.260364	0.188457	0.107534	0.757687	0.708674	0.784832
OS01G0535650	0	0	0	0.0582988	0	0	0	0	AT1G15200	3.88833	4.03281	5.80965	7.24262	11.0836	7.13019	9.1279	8.86094	10.4653
OS05G0475475	0.382913	0.200084	0.386864	0.425521	0.234032	0.532367	0.224184	0.222439	AT4G25315	0.837411	1.07484	1.04299	2.26781	2.1188	1.83342	2.17646	2.38041	2.74272
OS01G0915732	1.39721	1.21301	1.10872	2.53282	2.57967	0.146703	0.228103	0.653835	AT1G07733	0.432078	0.549352	0.22159	0.653523	0.630712	0.431865	1.26788	0.53364	0.900554
OS12G0448900	15.0571	15.1788	21.2207	8.70141	17.9306	32.719	31.4867	30.7392	AT1G07730	0	0	0	0	0	0	0.0539663	0	0
OS02G0103600	0.195904	0.4288	0.34439	0.210447	0.115743	0.0438814	0.272917	0.0733398	AT3G59250	2.43835	2.86169	2.82806	2.31495	2.08082	2.7371	2.37768	2.8725	3.26427
OS10G0177400	2.44483	2.67972	2.49804	7.69692	6.85277	4.8934	4.76324	2.20508	AT3G52280	2.54129	2.58483	2.22607	3.56878	4.83056	3.35581	4.46339	4.41394	5.43197
OS03G0702500	0.206186	0.122526	0.544882	0.35178	0.28663	0.183379	0.0792024	0.181621	AT2G25312	0	0	0	0	0	0	0.187918	0	0
OS08G0161401	2.22032	3.09893	1.66629	6.70352	6.24834	4.47606	2.9609	2.09991	AT2G02050	19.281	15.7949	12.9176	23.7798	22.6894	23.1333	26.5121	27.4073	36.0438
OS05G0519700	0.28138	0.113401	0.0292348	0.588457	0.875433	3.47992	3.76096	3.64204	AT3G20362	39.0378	47.496	40.4241	89.5	83.7586	72.063	49.5478	48.5983	66.376
OS01G0555200	2.54909	2.75757	2.09952	9.29659	8.47151	16.6013	19.0876	15.8094	AT1G04273	0.186784	0	0	0.22601	0	0.560075	0.876953	0.153792	0.389302
OS03G0853200	0.0995422	0.226261	0.0972171	0.0320795	0	0.0334454	0	0	AT1G80280	1.95319	1.50211	1.24112	7.18237	3.73843	5.25673	7.80591	9.7747	7.97303
OS10G0550775	0.675409	1.36463	0.527706	0.507883	0.532058	0.327791	0.294039	0.842834	AT2G31425	0	0	0	0.041249	0	0	0	0	0
EPlOSAG00000046321	9.23157	5.35614	2.92409	24.5241	15.478	14.2512	7.16895	10.7416	AT5G12270	0	0	0	0	0.0436243	0.0373383	0.0876953	0.076896	0.0389302
EPlOSAG00000046327	0.223391	0	0.32726	1.43985	0	0	0.14588	0	AT4G36450	0.0488737	0.0165704	0.0668395	0.0197126	0.076098	0.0325664	0.0573658	0.147551	0.203729
OS07G0490300	23.6116	19.7736	22.2328	15.7722	16.5254	13.9337	12.3997	10.8345	AT4G26560	0	0.0360444	0	0	0.0413827	0	0	0	0
OS12G0133025	1.01314	1.50327	1.58316	1.93862	1.44033	2.40412	2.54717	2.34682	AT3G02160	0.872082	0.606912	0.627713	1.14779	0.982662	1.05516	1.52644	1.78882	1.59441
OS07G0109500	33.8374	30.7539	27.8943	64.4961	36.4323	30.704	24.5971	10.3757	AT5G59780	2.59145	3.04932	3.42244	0.348409	0.632936	0.86339	0.914505	0.850699	1.18261
OS02G0101600	0	0.0424129	0.0328023	0.10824	0	0.112849	0	0	AT5G52380	1.94465	2.02935	1.8392	5.83679	4.57133	3.86215	4.12044	5.38575	4.92165
OS06G0706500	1.16434	0.980208	0.252699	0.312694	0.28663	0.217339	0	0	AT2G09975	0	0.0984091	0	0	0.0564918	0	0.0567811	0	0.100826
EPlOSAG00000019867	2.0376	0.367578	0	2.81424	4.29946	0.489012	4.94223	2.17945	AT3G27090	27.0387	24.4286	19.7016	36.545	38.1685	30.8254	25.0764	29.0492	30.2325
EPlOSAG00000019866	0.0335868	0.127239	0.0328023	0	0.0496091	0	0	0	AT5G44710	2.06378	1.4109	1.8739	5.28096	3.39775	3.61829	4.48735	4.90277	6.62841
EPlOSAG00000019865	0	1.25484	0	0	0	0	0	0.620016	AT2G09970	0	0	0	0	0	0	0	0	0.120127
EPlOSAG00000019864	0.573482	1.81046	1.40022	1.38612	0.423529	0	4.11947	1.61019	AT1G24030	0.0621174	0.0315909	0.0477852	0.225488	0.163213	0.201782	0.291643	0.370806	0.388403
EPlOSAG00000019861	0.960582	0.404336	0	2.06378	2.3647	3.76539	2.50913	5.39414	AT3G53880	1.69149	1.42311	1.26374	2.52682	2.07283	1.60717	2.206	2.0633	2.56794
OS03G0708750	0	0	0	0.0220646	0	0	0	0	AT4G05775	0.123098	0.0626035	0.126261	0.148949	0	0.0615185	0.0722433	0.152032	0.192424
OS09G0542600	13.8738	12.6497	9.23217	13.3754	19.6586	8.57237	7.95429	9.28734	AT1G30700	0.369353	0.335431	0.257073	0.143653	0.231065	0.0659235	0.0774161	0.0217225	0
EPlOSAG00000022267	0	0.475689	0	0	0	0	0	0	AT2G32885	0.015001	0.0152581	0	0	0	0	0	0.0123514	0
EPlOSAG00000022266	0.753398	1.42707	1.8395	0	0.5564	0.632839	0.491987	0.705116	AT5G61740	0.0180819	0.0459794	0.0278198	0.196914	0.179483	0.18073	0.413863	0.610412	0.734897
EPlOSAG00000022264	0.376699	0.475689	1.1037	0	1.6692	0	2.45993	0.705116	AT2G32880	6.61887	8.33946	4.44793	1.42333	1.76319	2.61466	1.54554	1.54675	1.57347
EPlOSAG00000041023	0	0	0	0.391857	0	0	0.158806	0	AT5G16590	11.7431	9.51474	9.20739	15.4325	11.6504	12.3036	13.7444	13.7487	13.7891
OS04G0326201	0.138576	0.127266	0.0984283	0.182695	0.44658	0	0.0329067	0	AT5G66140	9.493	9.21677	9.49106	14.2423	13.1573	12.4594	17.0795	19.4419	17.962
OS03G0121901	6.57046	9.48904	8.38727	8.11196	13.04	6.56067	6.86506	7.82964	AT5G19610	0	0.00640996	0.00646392	0	0	0	0.00739698	0.00518886	0
OS06G0254300	11.527	15.5009	13.2063	46.5669	55.1067	60.7132	67.2325	63.3292	AT1G80750	9.16827	7.71755	8.35622	28.9555	28.8251	18.8137	17.5549	19.2026	19.5651
OS02G0724600	7.35139	6.77675	6.68508	9.33176	7.85419	7.90402	6.64621	6.49804	AT2G40250	0	0	0	0.0271438	0	0	0	0.0554113	0.0233776
OS06G0132550	20.2481	23.6525	20.4982	56.3662	69.9296	18.9669	14.2136	18.4308	AT3G17980	0.0178007	0.0724228	0	0.0646171	0.0207872	0.0533758	0.188043	0.0586262	0.0742018
OS07G0661400	146.85	131.302	147.064	117.751	109.97	61.0305	66.5975	56.9848	AT5G44860	1.55174	1.10313	1.47182	2.78615	1.89002	2.68502	2.6635	3.4483	3.16465
OS02G0760500	51.9181	42.0133	44.7233	25.4108	25.7628	20.9721	15.1361	17.0705	AT4G33250	16.7818	16.0703	13.6118	30.6994	30.6285	28.1369	30.5891	34.2773	35.3475
OS02G0535400	20.3046	19.4297	20.7643	14.8867	14.9575	17.2419	16.4822	18.444	AT4G19038	0.0994338	0	0	0	0	0	0.116711	0	0
OS05G0119300	95.0023	74.607	85.8326	52.1331	46.8047	73.6431	72.7938	69.9453	AT5G21920	45.0995	40.9297	42.298	60.5778	59.0461	58.6503	64.9596	67.4546	62.6563
EPlOSAG00000049554	1.51671	1.06404	0	2.7155	3.73374	3.39734	1.76079	1.57723	AT1G31258	4.38319	5.47154	3.06533	7.4734	13.7271	6.17327	5.37864	5.08539	6.43646
OS08G0439600	3.49184	3.68279	3.43582	6.49058	6.23933	4.26229	3.51859	4.92045	AT2G31280	1.23345	1.2389	1.39166	3.01295	2.34963	2.27305	2.73265	3.11022	2.90821
OS09G0458100	0.0102956	0.0520046	0.0100551	0	0	0.0518887	0.0134466	0	AT4G02090	0.104521	0.106312	0.142943	0.295101	0.0813717	0.0696466	0.245365	0.258179	0.0726159
OS03G0127500	1.64937	1.15874	0.952892	1.34757	1.06369	1.54154	0.940545	1.00012	AT3G29360	13.2405	15.3367	11.8195	19.6571	19.159	15.4329	17.1314	18.733	20.8301
OS12G0496700	0.300769	0.189903	0.195829	0.0201935	0	0	0	0.0234579	AT4G17280	0.118937	0.120975	0.052283	0.0411187	0	0.0169827	0.23932	0.139899	0.194774
OS07G0185000	31.0247	34.6522	34.054	49.9568	49.9976	34.2654	34.9901	37.5568	AT4G28610	13.3497	13.3004	13.4435	12.0736	12.7163	14.512	16.3467	16.5189	14.4818
OS03G0283750	0.0589314	0	0.0287774	0.189918	0.0870442	0	0	0.220619	AT3G11220	1.20744	1.07285	1.01071	2.7709	1.99348	2.33047	2.4761	3.00537	2.73355
OS04G0164300	2.71336	4.35184	3.07602	6.67776	7.92529	6.05335	7.57753	8.80243	AT5G52420	11.2324	8.94982	7.79951	19.5588	16.0092	17.0465	10.0219	11.1446	11.3206
EPlOSAG00000040779	0.948723	0.898524	0.810742	4.0129	1.05098	0.996135	0.774424	1.10991	AT1G49310	0.300104	0	0.153908	0	0	0.0749891	0	0.154436	0.0390931
EPlOSAG00000040778	0	0.364814	0.423223	1.39654	0.64007	0.97067	0.377313	0.811149	AT5G59660	0.439948	0.355955	0.451253	0.314566	0.268557	0.22986	0.199515	0.263448	0.302179
EPlOSAG00000040772	3.06569	1.03235	2.19566	2.30528	2.41501	3.09014	6.13937	1.14769	AT2G17140	0.257426	0.295622	0.281076	0.462208	0.552744	0.423298	0.906464	1.23072	1.52307
OS06G0679200	0.300338	0.36662	0.283546	1.06469	0.635845	0.11773	0.143827	0.0374788	AT1G63350	0.277287	0.33181	0.393158	0.16776	0.171428	0.154878	0.402048	0.20145	0.212475
OS05G0574750	1.08679	0.442704	0.924449	0.338942	0.414254	0	0.549445	0.91871	AT1G77840	5.93486	6.14316	5.4961	11.3822	12.6372	9.86037	10.303	13.1064	11.3593
OS05G0577500	3.37046	1.47329	2.86128	1.42041	0.880779	0.740447	0.406337	0.242651	AT3G50860	1.73528	1.0683	1.24123	1.87869	1.94643	2.09957	1.90279	1.61677	1.6656
OS01G0815700	5.92156	5.89614	6.08606	9.95316	8.71946	5.60723	5.21677	6.30454	AT5G07310	0	0.0248255	0	0	0	0	0	0	0
OS11G0260200	0	0	0	0.886852	2.10854	0.0288942	0.112316	0.0643884	AT1G03290	0.65845	0.765408	0.61294	1.15158	1.008	0.912527	1.16254	1.21186	1.33777
OS07G0509700	11.7387	13.2872	11.8965	27.5963	27.9097	29.1694	30.4769	30.4308	AT4G15660	0.143068	0.349247	0.0293489	0	0.0334143	0	0	0	0
OS12G0624800	0.849655	0.464937	0.756048	0.699758	0.697209	0.222038	0.357567	0.106027	AT2G30770	0	0	0.0184659	0	0.0210237	0	0.0211314	0	0
EPlOSAG00000021517	0	0	0	0.703561	0	0	2.28103	0	AT5G20740	2.17165	2.23187	1.78661	4.29742	4.99276	3.82113	6.85041	7.56207	7.19013
EPlOSAG00000021510	4.00243	2.69557	2.60596	11.1788	15.3706	8.96521	13.9396	6.49295	AT5G41120	0.513081	0.591456	0.643213	0.496667	0.50596	0.592601	1.31153	1.35186	1.28326
OS01G0322300	0.0488846	0	0.190971	0.393851	0.433228	0	0	0	AT4G20240	0.0861158	0	0.0147214	0.0347337	0.0167607	0	0	0	0
OS07G0223766	2.2589	1.6755	2.37749	3.2865	4.84278	4.27383	4.16757	3.30463	AT4G18840	0.220801	0.199631	0.134207	0.504658	0.439293	0.351473	1.23824	1.42747	1.35504
EPlOSAG00000014339	11.237	7.78156	6.3723	15.7704	19.2745	11.5702	13.7292	18.9982	AT5G18140	4.71043	4.94707	4.274	6.34046	7.60011	8.27402	8.47327	9.6387	7.9587
EPlOSAG00000014336	1.28078	0	0	1.03189	0	2.15165	0	1.1987	AT2G38560	4.65989	3.78253	3.76766	10.5424	8.11825	8.70834	11.5449	11.8979	13.1132
EPlOSAG00000014337	0	0	0.750516	0	0	0	0	0	AT5G47435	9.62747	10.0131	9.32721	14.5364	12.743	12.708	15.3347	15.7715	17.2143
OS01G0589300	28.1749	26.3868	23.037	25.7794	25.4635	22.9869	22.313	21.6512	AT2G45510	0.309328	0.149823	0.19641	0.0891168	0.103207	0.117781	0.293918	0.145538	0.322357
OS02G0204700	2.90355	2.49268	1.63643	0.721213	1.16964	0.559121	1.28904	1.48226	AT5G47430	3.44221	4.09257	3.76108	6.27565	5.56282	5.1971	8.1892	8.40473	7.37407
OS05G0486300	1.03268	1.32791	0.904013	1.9887	2.12056	0.793382	0.731933	0.400745	AT3G09895	0.12338	0.376482	0	0.298582	0	0.123319	0.434454	0	0.128577
OS03G0633400	19.6588	19.8937	18.8648	24.9046	26.241	23.336	24.5463	25.4433	AT2G20560	1.56153	1.76674	0.953792	8.3009	8.31849	1.68351	0.350095	0.664526	1.02392
OS06G0673300	1.57453	1.61029	1.55529	1.63996	1.92772	1.40806	1.96258	1.58008	AT3G46760	0.0201173	0	0	0	0	0	0	0	0
OS06G0175900	4.52039	28.0657	3.87967	6.89766	5.41226	1.95605	2.77302	2.69226	AT5G51370	0.676131	0.536755	0.507443	0.897943	1.11695	1.08787	1.29688	1.22204	1.56389
OS03G0254900	40.1166	35.4178	37.2267	25.8625	24.6514	22.954	25.9501	22.5409	AT1G12780	1.68437	1.80766	1.80927	2.27882	2.0444	1.69679	4.82584	5.75492	6.64808
OS11G0152700	17.8467	22.9261	24.7341	5.30256	4.99867	2.52858	3.32109	2.79988	AT2G42090	0	0	0.0250572	0	0.0285281	0.0488349	0	0	0
OS08G0177550	4.39204	5.83246	5.20269	3.28744	2.59489	2.42775	2.14646	1.85639	AT1G09070	16.329	14.1729	12.9007	18.6235	15.8025	17.6267	16.0997	14.2998	14.7304
OS06G0156600	92.9257	106.785	96.296	428.563	421.377	173.864	211.283	220.396	AT5G27770	27.5454	25.3094	17.5051	65.2148	55.6442	51.7884	37.019	37.6876	54.2098
OS11G0557900	23.7907	18.4132	18.2632	21.9706	19.7993	15.1704	15.0013	11.2049	AT3G43300	8.62328	9.30024	10.0375	17.874	13.9744	12.2141	20.5831	20.5666	19.4204
OS07G0541800	0.035726	0.0451142	0.375083	0.215876	0.290228	0.0450136	0.0349949	0.066873	AT1G72990	1.14476	1.56624	1.22613	2.21873	1.90468	1.51885	2.8657	2.88608	2.81881
OS03G0266200	12.8713	10.216	11.657	8.76501	10.3373	8.67257	8.52969	7.3608	AT4G21110	8.29274	7.07527	7.30271	15.2825	14.5261	13.5781	14.8246	17.0026	16.6871
OS05G0525501	0	0	0.0285584	0	0	0	0	0	AT1G65930	63.1829	51.7236	46.8489	86.8021	78.4412	49.0749	38.1716	38.6151	44.4478
OS01G0610500	39.284	40.8347	31.8369	47.178	42.0198	21.7919	24.991	17.7791	AT2G03090	1.21917	0.667727	1.03888	3.29086	2.54079	3.48699	4.07288	4.86472	5.47303
EPlOSAG00000014643	13.2494	19.8682	11.9694	56.576	63.3577	15.5809	24.4424	15.5004	AT3G25260	0.0277287	0	0	0	0	0	0.0162734	0	0
EPlOSAG00000014644	3.49303	5.88125	9.66573	8.44273	6.87913	8.80221	4.56206	8.7178	AT1G22790	2.93457	2.3673	2.17964	3.35495	3.42692	3.33769	4.77474	5.46569	5.94762
EPlOSAG00000014649	0	0	1.04238	0.859908	3.15294	0.896521	0	3.99566	AT3G03120	1.53258	1.55884	1.82741	2.59622	2.17003	2.12541	2.90069	2.47645	3.01459
OS09G0526300	39.5965	42.5942	37.2871	41.0393	61.735	28.2507	30.1351	34.0394	AT5G41110	1.1927	1.01254	1.18482	1.36364	1.08573	1.29537	1.97314	2.61361	2.19227
EPlOSAG00000013144	0	0	0.213215	0.879451	0.16123	2.93407	2.56616	2.45188	AT3G03125	0.452048	0.229897	0.370931	0.382888	0.263945	0.406643	1.11425	0.781626	0.659523
OS02G0169300	181.913	122.182	138.763	181.223	145.563	156.727	141.859	101.703	AT1G51100	9.43136	7.87115	7.44132	16.1589	13.2102	15.2546	20.1848	22.3894	24.7815
OS02G0125100	56.7389	44.4657	52.0902	39.2588	34.8521	46.9516	46.5046	33.2454	AT4G24540	0.0232873	0.071059	0.0477714	0.140889	0.135972	0.186207	4.61938	6.30827	6.79509
OS10G0439800	0	0	0	0	0	0.0204919	0	0	AT1G57990	4.7482	4.37311	4.09811	4.30903	4.0741	5.46932	12.7607	10.3102	11.1485
OS04G0501700	9.91065	8.88162	9.04743	15.682	15.7696	13.6768	13.1283	10.9525	AT2G34900	2.03027	2.16745	2.25454	7.75569	7.99442	5.26603	6.00683	6.35508	7.62381
OS08G0163300	1.22302	0.61133	1.14469	1.84755	1.88173	1.92621	2.39599	0.333855	AT2G30480	0.793417	0.875298	0.920226	1.20375	1.26151	1.15904	2.05597	2.02013	1.65367
OS10G0516400	12.2823	8.77216	6.88593	20.4052	16.2736	14.0274	10.1135	8.65786	AT5G56860	11.2396	11.6309	12.0678	29.4727	16.3013	20.2453	18.2367	20.7604	17.8827
OS03G0855500	3.18781	2.89066	3.56048	2.4044	5.86062	4.21595	3.05614	4.0944	AT4G00820	1.62167	1.62368	1.31248	2.16152	1.7162	1.70951	1.54654	2.0863	1.67677
OS02G0600000	4.61986	6.29619	4.42682	6.12392	7.31298	6.32609	6.19314	6.36332	AT1G63440	0.236085	0.180098	0.224855	0.122428	0.187078	0.210686	0.296899	0.333232	0.37783
OS07G0120100	2.86067	2.73782	5.20538	0.145564	0.266863	0.20235	0	0.0563651	AT1G56590	3.30505	3.32967	2.97027	5.48455	4.79688	5.1911	6.1515	6.69954	6.16687
OS01G0269000	36.0882	31.3034	40.5088	8.20281	8.45081	13.0326	12.8636	13.4853	AT1G13780	1.02325	0.832626	0.929596	1.69802	1.72411	1.46106	1.80157	2.40718	2.2698
OS08G0482025	0.246303	0.0777569	0.120275	0.14883	0	0.103445	0	0.115259	AT5G01360	0.105242	0.0458766	0.0154209	0.145536	0.105342	0.150272	0.105881	0.222822	0.266353
OS03G0267550	0	0	0.275346	1.29797	0.178468	0.744282	0.526024	0.452339	AT4G24890	0	0	0	0.0966697	0.0932954	0.0266174	0.0468866	0.0109634	0.0138761
OS06G0219700	20.0382	22.4082	24.4399	20.7524	23.0201	14.9615	16.0194	23.034	AT3G55840	0	0	0.0147372	0.104312	0.184564	0.100526	0.252967	0.248433	0.209624
OS06G0244200	1.10213	0.845967	1.01307	2.542	2.93659	3.55785	2.96354	2.34616	AT1G27565	0	0	0	0	0.0609892	0.0522011	0	0	0.108853
OS03G0849900	70.1864	91.7903	86.597	21.6109	34.1711	13.6193	13.9926	14.3209	AT5G54860	1.12931	0.826475	1.00294	1.59978	0.948878	1.12875	2.24694	2.18852	1.75096
OS01G0369950	0.0361121	0.0456018	0.0352686	0	0	0	0	0.0675957	AT5G45990	0.0237605	0	0.0121855	0.0287504	0	0.0118744	0	0	0
OS02G0648000	2.6562	2.57349	1.96798	17.3047	18.5681	7.52052	9.30084	6.96502	AT5G45775	25.1309	20.3939	17.974	65.1895	56.3784	54.7991	43.5925	47.2002	60.8443
OS02G0767150	0.0907815	0.0644836	0.0831197	0.0274277	0.0335221	0.0381273	0.0592825	0.021241	AT1G14830	11.1772	10.3217	9.08889	15.9207	14.8163	12.905	17.8995	17.9085	18.2823
OS03G0598200	6.39013	5.45649	4.76701	7.2951	6.83507	5.30815	4.85043	2.74755	AT4G14530	0	0	0	0.0338662	0	0	0	0.0230448	0
OS08G0543700	2.76443	1.87745	1.36127	0.561488	0.343125	0.507342	0.546123	0.173934	AT4G23790	1.48001	2.21197	1.53353	4.42224	3.61535	3.83404	7.71088	7.0753	6.84612
OS01G0614500	12.8443	13.7423	12.1268	21.0145	16.932	16.3123	16.7323	15.4675	AT2G41610	0.0248355	0	0	0.0300512	0	0.14894	0.0291508	0.0408976	0.181171
OS01G0650700	8.27944	9.99674	7.97696	12.4862	13.1777	12.9709	10.3575	11.7866	AT4G03320	0.634858	0.538114	0.390703	0.768186	1.33447	0.719152	0.298067	0.5053	0.485172
EPlOSAG00000009955	0	0	0	0	0	0.448261	0	0	AT3G13190	1.2564	1.29474	1.57694	3.76063	4.09269	3.28816	3.33749	4.05625	4.28974
EPlOSAG00000009952	0	0	0	0	0	0.481713	0	0	AT1G32930	0.221764	0.483352	0.536162	1.89753	1.66481	2.12156	3.17934	3.36495	3.28499
EPlOSAG00000053021	0.91484	0	0	0.737064	0	0	0	0	AT4G39640	3.62447	4.2038	3.71761	4.68676	2.93121	3.02792	6.6417	5.28263	5.58114
OS12G0207000	0	0	0.0154682	0.0510415	0.0467872	0.0266074	0.0206853	0	AT1G13430	0.0209968	0.0854261	0	0.0254063	0	0	0	0	0
OS01G0372866	0	0	0	0.107055	0.196263	0.186022	0.0867712	0.0414535	AT1G08387	0	0	0	0	0	0	0.0198931	0.0139547	0
OS12G0165200	0.022095	0.0418519	0.0215789	0.106809	0.21213	0	0.144286	0.0827163	AT2G24990	2.02222	1.49224	2.0064	5.88537	6.59058	4.18776	4.40588	4.65775	5.16518
OS03G0298600	15.5171	15.6818	16.0625	14.2109	13.7305	17.2185	13.6975	14.5004	AT3G01142	1.51603	1.28212	1.55499	2.74132	2.16823	2.3155	2.6192	3.18376	2.94676
EPlOSAG00000040638	0.237181	0.74877	0.579102	1.52873	1.05098	0.996135	0.619539	0.443962	AT3G13222	1.18832	1.62457	1.55961	5.76696	4.64054	4.71261	6.91397	6.74376	6.4981
EPlOSAG00000040639	0.411678	0.173287	0.268041	0.884477	0.608066	0.461068	0.179224	0	AT3G13220	0	0	0	0	0	0.011435	0.0134285	0.0282595	0
EPlOSAG00000040637	0	0	0	0	1.01344	0	0	0	AT3G13227	0	0	0	0.0848643	0	0.0350503	0	0	0
OS03G0301550	0.0382484	0.0689993	0.0426914	0.54588	0.847419	0.119332	0.199817	0.0306834	AT3G13226	3.62452	3.24861	3.22075	4.71138	5.74129	5.3265	6.42358	7.15056	6.54463
EPlOSAG00000048008	0	0.475689	0	0.606994	0	0.632839	0.983974	0.705116	AT3G13225	1.68932	1.88455	2.25974	3.35345	3.12731	2.56775	6.29579	6.82009	5.10295
OS07G0619500	1.21362	0.9042	1.62383	4.40003	4.60691	3.1602	2.47268	2.77147	AT3G13224	1.73145	1.62844	1.98274	3.34352	4.32088	2.47737	4.70492	3.84724	4.81993
OS10G0542800	21.2309	22.4388	24.341	23.5196	23.0079	22.195	23.0569	21.5442	AT5G05620	1.79696	1.76926	1.88737	4.05296	2.87067	3.43409	5.50076	5.95375	6.69657
OS06G0227300	36.5021	39.4228	31.6155	75.4569	91.0174	29.2087	38.5779	24.9928	AT4G37550	7.28524	6.94694	7.23893	10.1664	9.90012	13.068	12.0886	10.7472	10.1906
OS05G0565400	61.2683	54.0017	42.6601	98.8023	68.7683	59.1479	45.9623	33.2225	AT5G25060	4.88507	5.23063	5.22185	6.31595	7.76405	6.45875	9.53379	9.74554	9.73897
OS02G0504000	0.511375	0.481151	0.137098	0.21004	1.19963	6.68741	9.53366	11.768	AT4G37553	0.186784	0.178809	0.191583	0.212715	0.410581	0.450256	0.825367	0.787054	0.641203
OS12G0289833	0.0807212	0.0611601	0.126137	0.858463	0.977675	0.108487	0.210851	0.332412	AT4G12740	0.203571	0.0905885	0.169652	0.307904	0.089147	0.368791	0.477885	0.733313	0.967914
OS11G0208100	0.273008	0.446898	0.207379	0.146637	0.358439	0.0679469	0.171677	0.132488	AT1G01290	1.80998	2.17941	2.0203	2.28672	2.26907	2.22145	2.04637	2.93674	2.8848
OS04G0496400	10.4782	10.3275	11.1144	10.9419	10.7327	16.1041	14.5266	12.2468	AT5G60670	24.1728	20.2188	18.5011	54.1336	52.6739	42.95	25.6653	27.1168	38.4642
EPlOSAG00000008608	0.680058	0.644075	1.32835	3.28744	7.03132	2.57056	1.33228	1.27295	AT2G46340	18.1071	19.4248	18.5257	20.8297	17.1124	18.1308	19.0202	19.3081	17.0636
EPlOSAG00000008600	0	0	0	0.312694	0	0	0	0	AT3G47680	3.51326	2.94187	3.68734	5.00243	3.95004	4.47515	7.46103	7.99196	8.1058
EPlOSAG00000008603	7.86763	7.16252	11.6151	10.6137	8.3778	7.68447	7.16895	8.21964	AT3G02830	45.0119	44.1149	38.7244	46.5261	50.9196	53.1578	27.311	29.9504	26.1994
EPlOSAG00000008604	0	0	0	0.359961	0.329958	0.750576	0	0	AT3G02832	0.256704	0.261102	0.117022	0.724766	0.49962	0.59868	0.569136	0.422724	0.683652
OS04G0609200	9.65508	10.2266	10.1801	7.15973	8.60024	6.19014	5.97045	5.58778	AT1G14780	0.045319	0.0806672	0.0929671	0.0274182	0.0132306	0.0339725	0.0398951	0.0746287	0.011807
EPlOSAG00000028035	0	0	0	0	0	0	0.236711	0	AT1G06573	0	0.0534853	0	0.0318137	0.0614066	0.0262792	0.0925815	0.0432963	0
EPlOSAG00000027075	0	0	0.113714	0	0	0	0	0	AT1G02650	0.238646	0.142786	0.259177	0.832321	0.836056	0.477057	0.346021	0.473898	0.42425
EPlOSAG00000027076	0	0.299508	0.231641	1.14654	0.700652	0.398454	0.619539	0	AT1G06570	21.3063	19.0131	18.7116	31.3517	26.0735	21.711	10.5844	9.76194	9.55969
EPlOSAG00000027072	0	0	0	0	0	0	0.226048	0.647945	AT1G09383	0	0	0	0	0	0	0	0.0743156	0
OS03G0276600	4.42325	3.72374	3.28315	6.27211	3.724	4.5576	3.52395	3.64301	AT4G14070	8.59071	9.07566	9.45968	9.81159	10.1196	10.6421	17.9665	18.971	17.9832
OS03G0309300	0.38154	0.935263	0.811013	0.0723287	0.1326	0.0377042	0	0.0420104	AT2G19890	0.0133749	0	0	0	0	0.0133683	0.0627952	0	0
OS09G0376300	16.8503	26.8371	23.6316	37.6272	56.839	69.7899	75.6547	125.29	AT3G62930	1.43893	1.29471	0.737951	1.33932	1.29257	0.387212	0.844473	0.956928	1.15349
EPlOSAG00000015929	0	0	0	0.938081	0	0.489012	0	0	AT1G52450	0.0596217	0.0454825	0.0611538	0.0901786	0.130546	0.126634	0.516112	0.650452	0.59803
EPlOSAG00000015921	4.71229	3.66191	5.31025	8.17724	6.42485	5.48062	5.20763	4.07105	AT4G01840	0.688877	0.840818	0.628071	0.889119	1.28713	1.22407	1.76089	1.52514	1.69104
EPlOSAG00000015926	0	0	0.29317	0	2.21691	0.504293	0.392052	1.12378	AT3G57550	5.17541	4.75843	4.9423	10.5194	9.31864	7.58092	7.79532	6.76977	8.03696
OS01G0607800	0.928693	0.46627	0.502675	3.10108	3.17313	8.34595	10.0541	13.488	AT5G57230	0.795764	0.8094	0.750916	1.61764	1.74704	1.11352	2.87682	3.93125	3.94738
OS05G0215800	20.6224	20.2047	19.379	26.2808	23.4974	16.6673	16.7625	13.5041	AT5G28380	0.0335581	0.102399	0.0860511	0.0812114	0.0391883	0.083854	0.0787781	0.124338	0.0524574
OS06G0264650	0.161442	0.4587	0.0788357	0.13007	0	0.135608	0	0	AT3G44485	0	0.0620356	0.0625578	0	0	0	0.071588	0.0502178	0
OS11G0197500	0.327328	0.317958	0.614774	2.15033	2.41739	1.39589	1.44694	1.3668	AT3G55950	0.714151	0.761395	0.723677	0.499738	0.55263	0.5934	0.696849	0.524251	0.591798
OS03G0452801	0	0.16282	0.251851	1.24658	0.190446	1.08305	1.01039	0.120674	AT3G16800	1.40368	1.24025	1.11981	0.411751	0.397379	0.439321	0.815469	0.863895	1.13774
OS12G0567800	2.69322	0.544153	2.13932	0	0.05304	0.0603267	0.0468997	0	AT3G44480	9.22525	9.58634	9.66703	15.0976	12.8082	11.9456	12.3138	11.9248	10.2429
OS07G0100900	1.1133	2.36113	1.25458	7.1067	8.93878	3.74061	3.26225	3.44648	AT1G62710	0.286618	0.460309	0.557021	0.0730128	0.0704643	0.256321	1.08008	1.0185	1.16332
OS08G0435725	0.12681	0.0800665	0	0	0.749212	1.38473	0.496858	0.593415	AT2G01630	1.38643	1.42362	2.00443	2.74807	1.94285	2.36238	5.37796	5.94693	5.13259
OS11G0244900	1.22443	1.32726	1.09	2.46187	2.54475	1.5655	1.44349	1.13582	AT1G10200	4.08892	5.18919	3.67455	5.08381	4.05213	4.61183	16.4236	21.5129	23.534
OS01G0919100	0.103288	0.326077	0.181576	0	0.0152561	0.121464	0.10792	0	ENSRNA049493787	1.23506	1.25622	1.68906	2.49072	2.72429	1.64593	3.38253	2.14681	11.0117
EPlOSAG00000007458	9.50471	2.29833	2.37005	5.53962	7.46748	0.339734	1.58472	0.757072	ENSRNA049493786	7.15604	9.53755	6.96027	5.52377	6.33952	4.93277	2.75154	4.16508	6.04311
EPlOSAG00000007457	0.758354	0.638425	0.49376	8.55382	6.34736	4.67135	3.63164	0	AT4G19390	0.632867	0.624778	0.553669	1.12614	1.0651	0.837205	2.22849	3.04987	3.02605
EPlOSAG00000007450	0	0.703193	0	0	0.411252	0.46775	1.09093	0	AT3G51240	15.7136	10.9939	6.62258	82.2269	92.1247	51.1644	3.53805	3.36303	3.94052
OS09G0135700	11.1611	12.0679	12.4399	14.6959	15.1133	16.362	13.5842	13.7257	ENSRNA049493783	1.97408	1.38044	1.2655	3.73228	4.17832	1.84979	2.60672	2.74286	6.94314
OS04G0676000	6.47004	6.11516	6.08631	11.3209	10.6705	10.6693	11.3533	12.0365	AT4G19395	6.04204	4.36138	3.19861	10.141	7.96617	7.01311	8.23573	9.94968	11.5775
OS12G0117400	17.4205	16.9152	16.6938	11.4672	14.1669	17.2132	18.2871	18.6384	AT1G08035	0	0.0322235	0.0324947	0.191669	0.0739917	0.25332	0.148741	0.547782	0.297135
OS03G0211100	10.6571	10.2351	11.4584	10.9654	10.9049	13.6972	13.4994	12.5878	AT1G05000	0.360597	0.460821	0.246575	0.514641	0.36711	0.369661	0.0651158	0.121807	0.0770842
OS07G0209201	2.9409	2.7774	4.84125	0.469854	0.233804	0.503856	0.217618	0.280701	AT1G08037	0	0	0.0352788	0.0416182	0.0401656	0.034378	0	0	0
OS11G0416900	0.632526	0.636288	0.392639	3.86095	4.95637	13.0846	14.0789	17.9002	AT1G08030	2.72849	2.41754	2.45033	3.41889	3.52613	3.35742	4.41244	4.77269	4.73902
OS03G0715900	0	0.0585994	0	0	0	0	0	0	AT1G05005	0.0393229	0	0	0	0	0	0	0	0
EPlOSAG00000008195	0	0	0	0	0	0	0.583519	0	AT2G04040	0.349878	0.370701	0.41868	5.34486	3.11541	0.5537	0.581783	0.492135	0.349422
EPlOSAG00000036781	0	0	0	0	0.190446	0	0	0	AT3G02740	3.48814	3.49247	3.18646	5.57263	4.78939	4.82107	7.48475	7.3708	7.14233
OS05G0520100	3.39121	2.88765	2.76506	6.2916	5.37658	4.33815	3.83989	3.5233	AT5G46640	0.834907	0.810018	0.922235	1.33663	1.01998	0.821657	1.38704	1.04702	0.977159
OS01G0788500	6.49174	7.19195	6.77098	5.61338	5.67867	4.39892	3.61441	3.70013	AT5G15610	8.65338	8.80165	8.29622	17.9909	15.7308	16.362	17.19	18.4122	19.6162
OS05G0143700	3.61149	5.47734	5.18161	1.04989	1.51231	0.250192	0.267446	0.41815	AT5G56840	0.167209	0.291556	0.416515	0.924915	3.65421	2.65016	2.52338	2.16347	3.31079
OS08G0365900	2.62852	1.97675	1.92125	3.41265	3.22712	2.48917	2.59113	1.4259	AT5G53490	37.1503	35.1166	36.5808	53.0737	49.052	41.7859	61.8615	67.1519	79.908
OS11G0490251	0.726995	1.33315	1.33977	1.49741	1.68074	1.38063	1.96503	1.65664	AT4G35030	0.588304	0.545895	0.391695	0.861718	0.807534	0.866547	0.581494	0.679848	0.731397
OS02G0251900	0.121901	0.277083	0.0952431	0	0	0.0819157	0.191051	0	AT1G18773	1.30783	1.25494	1.29081	1.31376	1.15264	1.28252	1.15854	1.01587	1.28577
OS03G0245200	0.493112	0.323801	2.06122	28.859	44.167	40.3932	40.6768	30.5705	AT2G21550	0.135463	0.0612372	0.154382	0.182123	0.0527299	0.0601759	0.176667	0.223072	0.23528
OS08G0133600	5.88357	4.44264	5.40606	5.41742	3.38743	3.46954	3.68529	2.78697	AT2G34650	0.115382	0.221678	0.249844	1.65985	1.10786	1.12762	1.86593	1.98449	1.75019
OS06G0190850	0	0	0.0161263	0.0798196	0	0	0	0	AT4G03200	6.34513	5.89384	6.16564	8.66059	8.17911	8.36278	10.3716	11.0953	11.4188
OS05G0566800	2.42234	1.92499	1.85589	10.7002	6.90904	8.91064	8.67287	5.66776	AT2G34655	0.109895	0	0.0845393	0.0332436	0.0641664	0.137301	0.25798	0.180969	0.200417
EPlOSAG00000039638	0	0	0	0.264587	0	1.10341	0	0.307358	AT4G03205	1.86743	1.78164	2.04905	6.97153	5.0715	6.29406	17.2464	20.8826	21.1354
EPlOSAG00000039637	4.21308	5.1074	4.11467	16.293	11.2012	6.79469	4.84219	6.93983	AT3G49230	0	0	0	0.0347337	0.0335213	0	0.033693	0	0
EPlOSAG00000039631	1.68523	2.12808	1.48128	4.07325	2.73808	1.69867	3.30149	5.04715	AT1G60840	0	0	0	0.458387	0	0	0	0	0
OS02G0618301	0	0.117199	0	0.299098	0	0	0	0	AT2G29200	1.21787	1.33727	1.23497	4.5716	5.19585	4.17052	4.9788	5.67468	5.65354
OS04G0442200	6.68521	5.83366	5.79155	15.2815	16.1565	60.6318	66.0061	64.3347	AT5G26990	2.46008	2.1686	2.04922	3.21125	3.29068	3.81497	4.11254	4.23525	4.47481
OS01G0247550	0.480291	0.242602	0.062543	0.103189	0	0	0.0836378	0.11987	AT3G14850	0.197868	0.322013	0.365314	1.00557	1.18613	0.949298	1.42446	1.29249	1.53964
OS09G0276600	3.95808	3.37143	3.62859	8.66426	7.39055	3.76382	4.316	3.87917	AT5G21170	1.75915	1.68895	2.47887	3.38186	3.5902	3.58229	9.33987	9.25911	7.86409
OS02G0525400	5.56876	4.63057	5.01604	5.33989	4.89481	4.61068	4.59586	3.64512	AT1G08633	0	0	0	0	0.0532364	0	0	0	0
OS10G0187701	0	0.0197719	0	0	0	0	0	0	AT1G08630	0.0256649	0.0261047	0.0526488	0.760843	0.584432	0.282175	0.180746	0.0845269	0.120357
OS07G0472300	0.0658685	0	0.0214433	0	0.0648604	0.0122951	0.0095586	0	AT5G56290	12.1839	11.6883	10.5823	16.5278	16.8533	17.1533	14.9488	16.8079	15.3536
OS03G0290400	1.26446	1.28769	1.3146	4.1407	4.2173	1.91867	1.43836	2.06145	AT5G05560	0.620032	0.662588	0.635965	1.83763	1.23731	1.20023	3.41313	4.03243	3.69286
OS04G0684100	17.7104	16.5694	20.1084	8.14488	8.13963	10.6944	11.5405	14.2101	AT5G23590	1.42186	1.46631	1.2761	2.73602	2.47909	1.91462	2.96696	2.78045	3.07668
OS01G0921600	34.9365	28.5106	27.9673	39.5233	31.6908	22.7344	21.6196	19.1921	AT5G57740	0.998407	1.03998	0.888343	0.69865	0.913066	0.9378	1.56722	1.5946	1.12821
OS06G0113900	14.3105	12.5062	13.7543	32.6836	33.316	24.722	20.9282	13.6406	AT1G04730	0.941431	0.907164	1.09268	2.60803	2.58451	2.26162	2.77222	2.71981	2.81416
OS10G0532800	2.06076	2.26652	1.88778	3.02398	2.88523	2.90361	3.15896	3.82869	AT5G42610	0.0256894	0	0	0	0	0	0	0	0
OS09G0441250	0.102667	0.178264	0.100269	0	0	0	0	0	AT3G02500	0.201223	0.272895	0.183461	0.162322	0.130546	0.46929	0.104972	0.239317	0.139799
OS02G0527800	1.19414	1.5523	1.13195	0.905497	1.50442	0.0590032	0.504579	0.0657421	AT5G49020	3.1698	3.15666	3.16963	6.46737	6.36553	5.68691	7.20762	8.6706	8.95624
OS07G0212200	5.51972	9.39463	6.51335	60.5904	63.152	150.913	126.842	122.021	AT2G21070	0.719867	0.732202	0.604117	1.58372	0.993487	1.15122	2.27368	2.38164	2.64612
OS09G0493700	17.0568	16.0776	16.7843	9.76872	9.85105	9.76401	7.80883	8.89081	AT1G55310	3.17454	3.19779	3.40269	6.73141	6.13885	5.91745	7.18868	7.76583	7.60579
OS02G0666000	0.190844	0.0401658	0.0621288	0.102506	0.187923	0.908396	0.166168	0.119076	AT1G32400	16.8194	15.2374	15.2048	18.0406	15.7463	16.569	23.1716	23.6952	24.5687
OS01G0229500	27.0124	20.1796	22.2147	8.86801	12.0814	10.2635	11.3092	12.8061	AT5G26667	6.97386	6.37736	4.36572	10.3599	8.46889	7.96854	10.2224	10.5945	13.2728
OS06G0136000	27.214	21.6567	28.2189	7.77608	8.25578	10.9549	10.0325	8.26129	AT5G26660	0.150075	0	0.0171035	1.79575	1.18783	0.916675	1.74194	1.83978	1.4597
OS02G0139500	71.7274	109.059	102.901	5.99697	6.62696	5.86926	5.83095	5.34182	AT4G16210	1.30015	1.50839	1.31272	1.94191	1.56573	1.6853	2.98058	2.42536	3.5143
OS07G0517400	0.316482	0.192423	0.0457911	0.604401	0.727157	1.22089	0.964462	0.351052	AT2G39795	1.92656	1.75598	1.59112	3.84491	4.38272	3.97627	4.05275	4.84123	6.07528
EPlOSAG00000027843	0	0	0	0	0	0.174458	0	0.194383	AT3G04900	0	0	0	0	0.0438068	0	0	0.0308871	0
OS03G0424800	145.379	124.257	115.547	441.935	293.302	155.723	116.074	60.3882	AT1G64950	6.29166	5.11957	4.356	8.65976	6.65844	6.65539	6.04636	6.8424	8.20949
OS09G0371700	15.5157	14.5229	15.6663	12.6366	13.4954	11.4096	11.0755	10.1491	AT1G61120	0.00919236	0	0	0.0222457	0	0	0	0	0
OS02G0779400	0	0	0	0	0	0.899297	0	1.67001	AT1G01010	0.557695	0.51863	0.392246	1.09899	0.874553	0.509642	0.598489	0.682225	0.697422
OS05G0294600	6.44085	5.9825	6.0196	6.6509	5.20722	8.62435	9.14669	9.11999	AT1G26940	1.30589	0.978726	1.12796	1.49698	1.68552	1.60294	2.52778	2.6032	2.86505
EPlOSAG00000007656	1.77338	2.61263	1.4433	7.14385	12.6602	7.44802	1.9301	5.53245	AT3G06020	0.470695	0.227981	0.20691	0.298333	0.759062	0.22403	0.420937	0.609017	0.350372
OS01G0710000	34.0983	26.239	25.4151	47.8743	40.9522	42.5065	37.753	23.5829	AT1G26945	4.38508	4.35649	2.90262	5.52193	8.63388	9.35192	8.04968	6.86423	6.88123
OS03G0215700	0.525049	0.29347	0.512785	8.89034	7.79334	12.6091	16.3004	13.147	AT5G62660	0	0.047996	0	0	0	0	0	0.0194264	0
OS03G0134900	12.6201	12.1394	8.57856	61.3405	35.0056	43.1989	32.0751	25.3141	AT5G57360	6.72145	7.40821	6.50991	9.21299	9.18736	8.51332	11.6141	11.8397	11.0006
OS07G0682850	0.0575199	0	0	0	0	0	0	0	AT1G27320	10.4834	8.91717	9.93364	10.8605	10.7041	12.0449	14.8723	14.8442	14.0055
OS09G0382300	13.0979	18.2409	10.3226	31.2572	26.9989	8.49519	8.55325	6.28443	AT4G05985	0	0	0	0	0	0	0	0	0.0800849
OS02G0528750	2.08126	2.62818	2.42354	9.80295	4.61117	4.03435	2.82277	2.99674	AT5G63280	1.87186	1.76794	1.32569	2.53461	2.18591	2.45004	3.76647	3.13751	3.01894
OS02G0676400	0.330684	0.33676	0.520902	0.154697	0.0787796	0.0537614	0.0696594	0.099836	AT1G76450	61.5272	56.1325	52.2306	69.2881	72.846	71.9264	61.6055	59.6024	62.341
OS07G0162700	0.12667	0.017773	0.0687285	0.317504	0.58208	0.543824	0.790423	0.500555	AT4G34332	0	0.181006	0.0782268	0.0615226	0.207813	0.355737	0.238717	0.083728	0.0794794
OS09G0524300	22.7679	24.087	22.8006	6.45654	8.9427	2.33708	2.62301	2.9891	AT3G27650	0	0	0	0.0651561	0	0	0	0.0665047	0
EPlOSAG00000026718	0.633351	1.86617	0.824742	0.680367	0.311829	2.12801	2.75729	3.55658	AT5G14545	25.5056	39.6215	18.5505	57.5157	60.6528	43.3382	37.2856	40.6647	51.9517
EPlOSAG00000026716	0	0	0	0	0	0.228899	0	0	AT5G14540	3.6683	4.92117	4.55008	4.51242	4.83879	4.78715	8.85456	8.49919	7.17571
EPlOSAG00000026713	0	0	0.150103	0	0.454023	0	0.200731	0	AT1G52040	0.261134	0.390601	0.504178	0.111521	0.161442	0.199593	0.306508	0.442668	0.36818
OS01G0927600	28.2133	31.7047	29.9861	46.5825	53.5889	59.7924	59.6437	66.9527	AT1G04190	4.98862	4.32167	3.6771	9.41018	9.98989	7.67832	7.90371	9.41754	9.50797
EPlOSAG00000041889	0	0	0	0	0.623658	0	0	0	AT5G04630	0	0	0.0803846	0.0568977	0.0549116	0.0313329	0.0551928	0.0774338	0.0816717
EPlOSAG00000041885	3.20194	4.49262	2.31641	1.14654	1.4013	2.1915	1.39396	0.665943	AT5G35450	1.04928	0.992795	0.988638	1.0039	1.07572	0.682913	1.08122	1.23062	1.32869
EPlOSAG00000041886	0	0	0	0	0.350326	0.597681	0.309769	0.443962	AT1G34580	1.2833	1.1055	0.873038	1.20421	1.43743	1.60987	0.96832	0.873335	0.750553
EPlOSAG00000041880	0	0.155514	0	0	0	0	0	0	AT5G50920	173.068	171.726	179.565	249.985	240.311	244.54	301.608	318.381	334.186
EPlOSAG00000041883	0.237181	0.149754	0.11582	0	0.175163	0.996135	0.464654	0	AT1G59920	0	0	0.0658425	0	0	0	0	0	0
OS07G0251200	16.0515	16.7224	17.0483	7.43607	8.7426	2.52805	1.83435	3.75571	AT5G04800	23.667	17.9823	18.5793	41.2075	38.3575	38.8717	28.5773	37.1382	36.4544
OS01G0775400	5.74954	9.18564	8.53478	5.26649	9.05161	2.89602	1.95213	2.23823	AT5G09980	0.0927477	0	0	0.224451	0.162463	0.092702	0.217726	0.0381829	0.193308
OS08G0414600	7.33599	8.61369	5.65629	12.575	11.8206	8.09818	9.35194	7.42433	AT3G19360	1.10477	1.03726	1.17674	4.23314	3.3907	2.80303	2.44383	2.62394	2.99633
OS10G0529700	0	0	0	0	0	2.94747	2.89295	4.35144	AT5G53060	1.89763	1.50122	1.49506	2.72876	3.02961	2.63888	3.93822	4.09106	4.0411
OS01G0940800	4.09251	4.66091	11.0255	4.18065	2.21263	1.08966	0.847135	0.404705	AT5G05465	0	0.12268	0	0	0.422549	0.361663	0.283142	0.397239	0
OS11G0106083	0	0.0174785	0.0270359	0	0.0204441	0	0	0	AT5G05460	0.118965	0.121003	0.133115	0.196293	0.202071	0.0540482	0.228494	0.302761	0.326844
OS10G0509600	7.52621	6.08588	6.51221	0	0.585081	4.43639	3.10408	5.19024	AT5G09760	1.87353	1.82226	1.30914	4.44897	3.45955	4.85707	3.80713	4.02042	4.91771
EPlOSAG00000001066	0	0	0	0	0	0.22106	0	0	AT3G50240	4.10788	4.33897	5.16262	12.3627	11.6325	12.3627	19.8606	20.1204	19.217
OS01G0291733	1.431	1.66165	2.60239	0.318048	0.315833	0.33159	0.257788	0.123154	AT4G18260	0.125833	0.255979	0.0322667	0.304519	0.220417	0.251542	0.184622	0.207215	0.3934
EPlOSAG00000001068	0	0.441094	0	0	0	0	0	0	AT5G15490	3.8445	3.70143	3.13055	9.5346	8.94476	7.53855	10.1273	10.8374	11.7899
OS02G0134000	14.0483	17.1896	16.8964	12.0477	9.85499	9.80071	14.8884	8.72351	AT4G27430	16.0285	16.3032	15.9779	20.2235	20.1775	19.3354	23.5236	22.9262	23.372
OS03G0696150	1.30477	0.909046	1.18641	0.434989	0.598098	0.529095	0.998952	0.168435	AT4G17890	4.28668	4.74485	3.79335	7.72955	6.52728	6.07681	9.19156	9.38901	10.6279
OS03G0143100	0.0571775	0.123776	0.311119	0.776549	0.844536	1.71528	0.682757	0.565712	AT4G17895	1.36225	1.50019	1.34473	2.14408	1.87787	2.00654	2.62084	3.17938	2.62579
OS11G0282900	0.0891078	0.0450096	0.0609185	0.143584	0.263232	0.164667	0.128017	0.116756	AT4G27435	0.371846	0.357205	0.148323	0.424941	0.24124	0.39231	0.412208	0.816445	0.990298
OS12G0188566	1.00348	1.96505	1.29252	3.84322	2.64216	3.39606	2.20333	2.85836	AT3G09500	80.0886	79.6886	63.2997	164.414	155.752	147.021	123.046	148.032	177.522
OS10G0130600	0.068648	0.0371519	0.0574667	0.0632092	0.050698	0.0906132	0.0832535	0.174389	AT1G60650	1.45676	1.20466	1.26339	2.89484	3.31936	2.7582	2.71079	3.48135	4.28283
EPlOSAG00000036115	0	0.909756	0.703608	0	0.70941	0	0.313642	0	AT5G19130	2.18322	2.16427	2.13702	2.57467	2.60128	3.0683	4.7349	5.2468	4.25008
OS02G0718100	78.7774	54.5752	51.7944	232.668	185.754	45.9524	39.5493	33.9129	AT3G15810	13.5709	11.9347	10.2262	17.8733	16.6773	19.8077	13.4274	14.764	15.4189
EPlOSAG00000000736	6.34961	12.3357	13.6746	7.08331	6.97387	2.73515	4.25277	0.914261	AT1G77570	0.243778	0.371933	0.583432	1.86817	1.37594	0.609145	0.619961	1.0705	0.84682
OS09G0378300	19.5736	16.5554	17.9017	20.6323	16.1118	10.841	9.68636	6.94602	AT5G01490	0.0579361	0	0.0445687	0	0	0	0	0	0
OS07G0512100	11.694	12.8684	10.7438	13.8767	14.6324	8.75628	7.66922	5.73811	AT2G23690	1.80988	1.84089	0.876628	2.46372	3.40514	1.48237	0.678614	0.579523	0.759684
OS04G0659400	17.6662	16.1534	17.8224	20.3057	20.0707	22.6682	22.312	21.9193	AT3G63445	1.39422	1.18914	1.49708	2.82049	2.08605	2.38788	2.43766	2.79217	2.3232
OS01G0930500	0.183405	0.694802	0.462728	1.84706	1.12874	1.00137	1.21764	0.343302	AT1G10950	15.4896	14.7602	13.9794	29.9984	22.3342	21.7088	32.3315	33.8231	29.758
EPlOSAG00000003426	0	0.181046	0.140022	0.46204	0	0	0	0	AT3G63440	1.04532	0.763344	0.948466	1.94592	1.5963	1.79492	1.52582	1.6993	1.74575
EPlOSAG00000003427	0	0	0	0	0.715372	0	0	0	AT5G15680	4.01399	4.09459	4.44301	7.0698	6.22579	5.88635	9.7867	10.3871	9.16155
EPlOSAG00000003428	0	0	0	0.19844	0	0	0	0	AT2G27150	2.37718	2.17109	2.36715	2.13934	1.91429	1.99486	2.32519	2.37323	2.13668
OS07G0659900	2.13055	1.29882	1.86553	9.58888	9.16943	19.4389	17.3912	15.4708	AT2G15170	0	0	0.0366862	0.0865571	0.0417679	0.0357495	0	0.0294495	0
OS05G0348700	0	0	0.117268	0	0	0	0	0	AT5G51510	2.82612	3.66752	2.9987	5.69939	5.08317	4.54553	6.02429	6.57963	7.9553
OS03G0791432	3.92426	3.21291	2.80075	4.89887	5.44598	4.27432	3.82988	2.86557	AT5G04730	0	0	0	0	0	0	0.0150622	0	0
OS04G0643550	0.0522292	0.0659542	0.0850154	0.140266	0.141432	0.0877429	0.0227379	0.0325881	AT3G08455	0.331475	0.28899	0.339993	0.0572983	0.0552983	0.425972	0.0555815	0.155958	0.197392
OS06G0178950	0.378679	0.371925	0.353397	1.58648	0.522037	0.240329	0.252782	0.126013	AT1G77320	1.21474	1.31183	1.2075	1.73298	1.91767	1.89617	1.83067	2.2535	2.50838
EPlOSAG00000037248	0.408758	0	0.39921	0	0	1.03005	0.266929	0	AT1G73660	9.33945	8.74566	8.22729	14.9593	14.1002	12.3241	10.6158	9.80129	9.43893
EPlOSAG00000052445	0	0	0	0	0	0.196797	0	0	AT4G29860	0.637555	0.37828	0.463206	0.819663	0.697988	0.889482	0.779514	1.26861	1.07966
OS07G0497100	24.4565	35.9328	29.7999	43.1666	44.4692	38.9926	40.2294	42.0087	AT2G05620	82.2125	71.1639	62.6401	87.7375	90.4515	90.1824	46.9228	49.4615	52.0198
OS02G0146700	55.7502	49.6501	49.7354	51.9661	47.6435	38.1766	34.4081	26.672	AT3G21710	0.0997657	0.101475	0	0.048287	0.0233008	0.0598299	0	0	0.0207936
OS11G0271675	0	0	0	0	0.0509909	0	0	0	AT2G07035	0	0	0	0	0	0	0	0	0.0778604
EPlOSAG00000027478	0	0	0	0.206378	0	0	0	0	AT5G22830	11.9007	10.5916	12.0216	15.7636	14.9151	16.3554	27.4609	31.1282	28.3273
OS12G0105975	29.618	27.5723	28.9594	25.6051	25.2319	20.4579	18.1512	16.2908	AT5G58920	2.10638	2.27432	1.82812	3.76429	3.93564	2.78553	5.28708	5.28304	6.72038
EPlOSAG00000027471	0	0.527395	1.22367	2.69189	1.85064	6.66544	4.63644	4.29968	AT5G37290	2.10956	2.22823	1.68524	3.92705	4.00317	3.00058	2.97608	3.25677	3.21306
EPlOSAG00000027472	0.954616	0.904105	0.582698	3.07644	0.352502	1.80418	0.779234	3.57376	AT5G11440	0.0477317	0	0	0	0	0	0	0	0
OS03G0367150	0.554182	0.311028	0.390894	1.4883	0.227375	0.155167	0	0.461038	AT3G10360	5.01855	5.5196	5.0447	4.85973	5.29204	5.9463	8.73918	9.82632	8.2888
OS12G0143900	103.903	89.6713	111.113	35.4806	34.7822	22.9438	25.4789	14.3986	AT1G79430	3.23634	2.26844	2.20154	2.29279	2.58482	2.93306	2.14536	2.37476	3.07558
OS05G0542300	2.26599	1.8247	2.11684	10.3718	3.78352	9.76519	11.409	9.95841	AT1G35670	5.62923	4.78386	3.8593	9.14118	7.48335	8.30012	5.17546	5.21582	4.96264
OS05G0437750	0.12681	0.0800665	0.433466	0.510836	0.468258	0.42607	0.0828097	0	AT3G28635	0.218673	0	0.392512	0.595344	0.383042	0.546414	1.73252	2.29563	1.7661
OS06G0160001	18.2768	15.4651	15.4303	28.4711	14.9132	50.4931	42.3683	6.99969	AT5G44610	0.0491716	0.0750212	0	0.0297491	0.0287107	0.0245737	0.0288577	0	0
EPlOSAG00000016827	0	0	0	0.331088	0.303491	0.345185	0.268356	0	AT2G08945	0	0.133452	0.269151	0.317517	0.153217	0.131139	0.154001	0.324089	0.13673
OS10G0523700	40.4587	44.3651	47.2551	44.4034	60.0097	48.2317	39.9187	38.2469	AT5G23903	0	0	0	0	0	0.0554301	0	0	0
OS10G0567100	0.0690003	0.024895	0.00962693	0	0	0.0331193	0	0	AT1G36070	1.06663	1.29285	1.49519	1.35516	1.24558	1.4037	1.77361	2.34195	2.45469
OS01G0941200	0.109157	0.0787667	0.0152296	0	0	0	0	0	AT3G04010	0.0645266	0.0218774	0.0661847	0.0650649	0.0125588	0.0859931	0.176723	0.150533	0.112074
OS02G0649750	0.0255559	0	0.0686371	0.144128	0.0377471	0.214664	0.0166886	0.0358772	AT2G23347	1.16311	2.21819	1.04387	0.703686	1.69781	1.45317	1.53585	1.79563	1.36361
OS11G0649500	14.6228	6.96236	12.6089	4.85595	7.08146	1.66839	1.16288	1.73074	AT1G70310	10.8822	11.3736	11.0171	21.2132	21.6468	18.3337	26.3327	25.733	27.5518
OS01G0704200	1.61455	3.0863	1.90956	3.41311	3.69747	3.01098	3.65633	4.85209	AT3G04015	0	0	0.214414	0.168629	0.0813717	0.0696466	0.245365	0.114746	0
EPlOSAG00000045410	0.985213	0	0.24055	0.793761	0	1.65512	0	0.461038	AT2G23340	1.02592	1.06618	1.21241	2.1589	2.23981	1.00312	2.32982	2.51576	2.23122
OS03G0187550	0.0361461	0.0798782	0.0529527	0.087366	0.0667366	0.0910859	0	0	AT4G37095	5.02949	5.11567	4.93444	9.2609	5.61795	8.3055	7.18674	7.02192	9.11536
OS04G0606601	0	0	0.155924	0	0	0	0	0	AT2G02390	2.07939	2.26978	1.95942	2.82293	3.00078	2.41631	2.46054	2.57512	3.04786
OS03G0408500	11.4844	10.5454	9.19575	9.24043	8.62751	8.5095	5.99967	6.97579	AT2G23348	0.75391	0.699167	0.659565	1.12688	0.621457	0.820027	0.936959	1.15021	0.83188
EPlOSAG00000030513	0	0.21856	0	0	0	0	0	0	AT3G21820	2.16411	2.42132	2.91735	5.08757	4.71142	4.04799	5.9149	5.43469	5.68649
OS04G0453266	3.39029	1.49502	1.4716	0	0	0	0.0702838	0	AT2G09010	0	0	0	0.0943347	0	0	0	0	0
OS04G0105700	67.0581	57.1912	56.8594	108.819	82.4319	52.063	50.0157	43.2762	AT1G50750	0	0	0	0.104062	0.125537	0.171917	0.277597	0.230135	0.291276
OS02G0765800	0.208256	0.0657457	0.25424	0	0	0.0874655	0.0679982	0	AT5G59740	0.651298	0.519224	0.397209	1.32056	1.25391	0.862105	0.847109	1.00005	0.843827
OS02G0829200	38.8913	47.8487	41.1308	63.1304	64.9861	48.9125	49.613	54.4989	AT3G12870	0.37924	0.652787	0.568516	3.0004	2.044	2.18684	5.75251	9.10342	7.75226
OS08G0135400	7.79197	9.14727	10.1276	14.3788	9.44158	7.85803	9.04933	8.47167	AT5G64370	2.82668	3.24553	2.91711	4.65834	3.46294	3.32795	5.53651	6.42536	6.75894
EPlOSAG00000039531	0.841386	0	0.136955	0.451922	0	0	0	0	AT1G53310	6.54919	6.74563	6.48584	10.9214	10.9445	9.12673	19.3062	21.0986	20.2711
OS11G0542800	0	0.021856	0.033807	0	0	0.0581527	0	0	AT4G35530	1.43185	1.03068	1.19751	1.86583	2.46954	2.09168	3.49057	4.04469	4.33875
OS10G0345100	13.2825	12.5	12.6566	4.67117	5.93786	9.94375	9.40595	13.3294	AT2G32380	2.24967	2.08632	1.45914	3.3226	2.62711	2.54617	4.03851	4.14047	3.86141
OS01G0173600	19.1739	38.0449	41.4846	0.243036	0.0556946	0	0	0	AT4G01190	0.155773	0.193652	0.106517	0.251316	0.262756	0.207595	0.243786	0.256518	0.234483
OS01G0705100	1.02462	0.75476	1.02848	0.183447	0.168157	0	0	0	AT2G18030	2.91415	2.1029	2.44374	4.28857	3.95492	3.7393	3.37428	3.40459	3.46781
EPlOSAG00000006591	0.246303	0	0	0.793761	0.3638	0	0	0	AT2G36400	0.465441	0.401686	0.925869	2.50875	1.74589	1.53661	8.49269	9.40656	9.21586
OS08G0294300	0	0.0314658	0	0	0	0	0	0	AT5G62640	1.58442	1.72854	1.93968	3.6488	3.14841	2.83523	7.33391	7.77479	7.93621
OS02G0467700	26.3173	24.0275	25.8311	26.5464	23.7507	22.7692	27.0505	19.9017	AT4G14350	4.49859	5.37521	5.71188	6.92164	7.88554	6.11507	7.88146	7.48599	7.87596
OS07G0481400	11.5437	13.6265	14.8469	7.56619	8.62412	6.40811	7.0212	6.72245	AT1G30000	3.3837	2.99726	3.49149	4.85661	3.83274	3.85937	4.53219	5.01988	4.57455
EPlOSAG00000006598	0	0	0.228816	0.755041	0	0	0	0	AT4G22513	0.29838	0.910479	0.874421	0.154733	0	0	0.900579	0.842322	0
OS01G0687700	17.0614	14.8945	16.6173	12.6538	11.3229	10.9677	9.13707	7.46634	AT2G29995	0.567444	0.461734	0.174608	0.583621	0.762044	0.595523	0.732644	0.700825	1.09399
OS02G0300700	9.74404	7.12679	13.386	7.16384	4.93355	11.687	14.3809	11.6851	AT3G61550	4.8947	4.36845	5.3158	4.47101	4.42702	3.45338	4.61867	4.80062	3.77564
EPlOSAG00000006203	0	0	0	0.276399	0	0	0	0	AT4G09435	0.0553433	0.0375277	0.0189218	0.022322	0.0646285	0.0737547	0.0433063	0.0303787	0
OS04G0151900	9.40007	8.12136	8.43411	9.49161	8.42262	7.27861	7.532	6.47033	AT4G09432	0.471667	0.407787	0.532167	0.542187	0.702272	0.707153	0.816593	0.689334	0.884761
OS08G0241400	1.51135	1.44974	2.72502	0.538581	1.03031	1.34275	1.23369	0.544038	AT2G29990	0.970004	0.761111	0.739091	0.838368	0.712013	0.872574	1.70782	1.79131	1.51629
OS01G0937800	0.27971	0.316033	0.488842	0.355824	0.195699	0.173121	0.0192271	0.192894	AT1G25550	11.2307	10.7851	11.121	7.21024	12.0336	8.73232	19.9659	15.1247	15.5167
OS10G0554900	6.53048	11.5905	7.19193	54.8074	55.4595	37.3437	39.8209	33.7887	AT3G62310	7.00251	7.08598	6.07746	13.0356	13.262	12.3471	10.116	11.8418	11.6198
OS01G0866100	110.923	89.8232	133.475	80.5648	93.5358	144.833	164.129	142.9	AT3G59350	1.93905	1.48429	1.21998	3.20496	1.82084	1.23878	5.33797	6.67427	6.65589
EPlOSAG00000012996	0.325621	0	0.318015	0	0	0	0.850553	0	AT5G10820	0.428341	0.43568	0.651446	0.786381	0.689939	0.560997	1.97639	1.98232	1.69317
EPlOSAG00000012992	0	0.397708	0.922765	0	0.930374	1.58728	2.05667	1.76857	AT4G01220	1.63975	1.56828	1.46851	2.35429	1.74338	1.88356	2.57101	2.83123	2.02763
OS02G0136933	8.0565	11.4542	9.44564	23.1797	27.2391	12.2411	11.7731	14.307	AT1G75890	0.0558026	0.0756783	0.0190788	0.157551	0.195495	0.167325	0.218329	0.352254	0.310149
OS04G0615100	70.948	52.6816	77.5297	19.1554	21.769	27.6522	29.5888	27.495	AT1G75891	0.231506	0.06422	0.0647606	0.331057	0.442387	0.210357	0.296435	0.450546	0.460582
OS01G0872533	0.624957	0.555353	0.474724	1.47324	1.43592	0.933246	0.740648	0.411601	AT5G66840	0.0285378	0.0870803	0.102449	0.362575	0.333257	0.413594	1.03839	1.11611	1.27881
OS06G0710300	16.9444	18.1009	26.6876	25.0682	25.0937	55.5788	59.2997	54.8348	AT1G51805	17.7901	16.5739	14.6586	12.9311	15.1075	14.4324	23.5722	21.1877	21.8328
OS12G0506500	5.71342	6.26625	8.81456	2.14569	2.42074	1.58697	1.62023	1.6404	AT1G54830	1.55727	1.30849	1.61465	2.70359	1.83831	2.38552	4.62925	5.2961	5.57419
OS01G0533800	2.70142	4.01739	2.34369	9.23618	9.21575	5.48279	6.44745	6.54535	AT1G51800	2.34771	2.91059	2.66248	1.54366	1.74842	1.36366	0.915081	0.583559	0.350833
OS06G0203200	31.5985	32.7323	24.4868	7.4557	6.00845	2.25097	3.16002	3.04937	AT5G03040	24.5196	22.59	24.3255	27.8865	28.3728	28.1664	33.3388	34.3034	32.3098
OS11G0414250	0.217081	0	0.106005	0	0	0.364687	0	0	AT4G14965	4.4502	3.75547	3.33564	7.45587	5.6537	5.71887	7.26117	6.92568	8.74018
EPlOSAG00000013028	2.51956	0.397708	1.23035	6.59733	5.58225	7.93642	3.702	4.12666	AT1G51140	4.42988	4.00514	2.736	3.07395	6.99018	8.29995	5.31141	5.55612	5.60925
EPlOSAG00000013024	0.320194	0	0.62543	0.515945	4.7294	0.537913	5.85464	0	AT5G19790	0.0288283	0	0	0	0	0	0	0	0
EPlOSAG00000029949	0	0	0	0	0.301877	0	0	0	AT4G16850	0.699784	0.438015	0.496915	0.759901	0.712423	0.735308	0.610766	0.901207	1.32763
OS11G0541600	0.256669	0.291705	0.200539	0.909882	1.32689	0.862385	1.03919	1.22512	AT1G21440	2.90471	3.37655	2.82458	7.18921	6.67396	6.48524	8.70065	11.2283	10.0443
OS01G0694300	26.5431	25.4991	27.4562	31.1004	31.7489	21.6963	24.7885	27.6802	AT4G11800	3.18289	3.13535	2.88233	3.33088	3.23136	3.4536	5.0738	5.507	5.13978
OS03G0194600	0	0	0.0500344	0.0825512	0.0756704	2.06559	0.970198	9.1101	AT4G24580	0.0969255	0.0985864	0.12427	0.156375	0.179213	0.177609	0.189611	0.186213	0.143095
OS04G0388700	15.4516	15.6583	17.0183	7.85456	6.32296	5.24935	4.21023	7.84726	AT3G06500	2.01949	2.03396	2.41662	0.802556	0.762983	0.890513	6.56504	6.99349	5.92163
OS05G0375466	0.32731	0.341439	0.430852	0	0.0210196	0	0.0743447	0.0532755	AT4G16855	0	0	0	0	0	0.0877115	0.0515013	0.0722547	0.0457255
EPlOSAG00000041697	2.08024	4.94475	2.39018	5.91529	2.71112	2.46686	4.47489	2.29051	AT2G43930	0.531227	0.227507	0.2581	0.575128	0.293852	0.503019	0.393808	0.644584	0.728423
OS03G0183000	786.847	714.166	821.788	276.519	199.728	23.0397	29.1642	21.5382	AT5G39900	1.17969	0.95992	1.0527	1.88421	1.85977	1.4503	2.09084	1.87464	2.21287
EPlOSAG00000034333	2.51581	4.62098	7.5945	8.1077	10.8101	14.6005	13.1431	11.987	AT2G27840	4.83726	4.19909	3.93503	18.6947	19.4544	11.7746	8.12507	8.89276	11.7986
EPlOSAG00000049449	0	0.480399	0.371542	1.22601	0.561909	2.55642	1.98743	2.13629	AT5G54040	0.0150178	0.0458253	0.0308074	0.0181717	0	0.0150104	0	0	0
EPlOSAG00000049443	1.21155	1.0928	1.01421	8.08778	2.55643	4.36146	2.26048	3.23972	AT4G30935	1.28957	0.999369	1.25973	2.37775	2.5816	1.94875	4.21658	3.79213	4.23966
OS01G0229600	22.4509	22.4336	18.1262	6.56557	10.9834	11.6367	9.15315	14.8344	AT1G49430	9.11884	8.62622	5.80243	15.0184	15.1843	13.2496	15.1079	14.0972	14.9094
OS05G0143200	2.97247	3.7001	2.83409	5.9729	5.49591	3.59399	4.40781	3.59477	AT5G61310	19.9645	18.7596	19.8863	33.0104	44.9828	32.1003	60.754	43.7121	70.2745
OS01G0166200	0	0.0573526	0	0.0365918	0	0	0.0296588	0	AT4G30930	2.10099	1.86193	2.38968	5.38649	5.90294	5.73849	6.07966	6.83393	8.23766
OS03G0200000	0.0842616	0.106404	0.049376	0	0.124458	0.0283112	0	0	AT1G08990	0.0480515	0.0244374	0.0246431	0.0290714	0.0140283	0	0.0141002	0	0
OS05G0246600	2.37884	2.72843	1.94386	4.18473	4.9757	2.82516	2.74545	3.22752	AT2G32960	2.26291	2.07959	1.30305	8.76686	7.34819	3.57125	1.07176	1.38924	1.09637
EPlOSAG00000003283	0	0.323469	0	0	0	0	0	0	AT4G04805	0	0	0	0.0753367	0	0	0	0	0
EPlOSAG00000003284	0	0	0.446736	0	0.337814	0	0.298706	0	AT5G24360	2.21292	2.13786	2.06822	3.37034	3.39238	3.49282	6.05733	6.09228	5.97457
EPlOSAG00000003285	0	0.311028	0	0.793761	0.7276	0.827558	0.321684	0	AT1G28120	6.32312	6.60425	5.09168	9.95777	8.61832	7.90472	8.55168	9.82197	10.4251
EPlOSAG00000003286	0	0	0	0.407325	0	0	0	0	AT4G28750	1084.06	1015.73	1011.91	919.96	970.269	1138.41	1115.4	1222.92	1129.51
EPlOSAG00000003288	1.96483	1.92979	1.91893	8.09095	6.12673	1.46703	0.570257	1.22594	AT4G25100	372.434	357.694	336.225	338.699	384.498	372.198	283.279	290.622	299.844
EPlOSAG00000003289	8.85031	2.99845	6.53539	18.0871	17.8548	9.42858	6.20235	4.84866	AT2G13810	0	0.0174142	0	0	0	0	0	0	0
OS03G0101300	3.18535	4.06109	4.09059	6.63798	5.49659	7.67957	10.5006	10.7496	AT5G22660	0.0155743	0	0	0	0	0	0	0.0128234	0
OS05G0170600	0.236731	0.160968	0.0711389	0.4108	0.537942	0.27533	0.118916	0.0681724	AT4G28755	0.18875	0.095992	0.1936	0.228389	0.440835	0.188657	0.775411	1.3987	0.3934
OS06G0135000	19.9267	27.5511	27.8148	29.2877	31.6039	28.3232	28.783	31.6957	AT5G03795	0.0137159	0.0697545	0.0562733	0	0.0160171	0.137091	0.0482973	0.146812	0.100055
EPlOSAG00000010829	0	0	0	0	0.429946	0	0	0	AT5G19860	8.77991	7.23042	7.35985	7.11848	7.72876	7.99603	12.5026	12.5867	13.353
EPlOSAG00000002776	0	0	0	0	0	0	0.275729	0	AT2G14620	0.0395542	0.020116	0	0.119652	0.0230952	0.0197673	0	0.0814193	0.10305
EPlOSAG00000002771	5.23954	18.1339	12.8876	15.0093	16.3379	2.93407	4.05516	4.3589	AT5G37230	0	0	0	0	0	0	0.0391691	0	0
OS09G0559050	0	0	0	0	0	0	0	0.0234273	AT2G20310	1.91232	1.80276	1.54684	3.87536	2.52365	2.4708	3.24827	3.62274	3.45106
OS01G0672400	28.781	26.607	30.7068	23.8282	25.556	23.1898	23.0067	28.1439	AT4G38210	0.824334	0.910327	0.555625	1.53893	0.660094	0.706224	0.774053	0.91144	0.662699
OS04G0625600	4.45215	4.2968	4.46684	1.94036	1.8439	2.17145	3.59272	3.37069	AT3G10940	13.0811	13.3776	10.622	6.91053	8.21904	10.7061	14.9646	13.8925	17.7316
OS12G0105500	11.4653	7.30783	8.20323	6.4895	5.03755	3.29148	2.46412	1.86766	AT1G31350	1.74028	1.24433	1.07807	2.2517	2.0725	1.85998	0.849425	1.10659	1.36468
OS07G0611400	0.111858	0.317819	0.327736	0.270364	0.206524	0.375834	0.036523	0.0523449	AT5G62150	0.3123	0.198532	0.0800813	0.188943	0.182348	0.0390183	0.0458205	0.128569	0.122045
OS08G0390600	2.39196	1.82191	1.89112	2.75306	1.45808	1.72217	1.43804	2.20314	AT1G74140	0	0	0	0	0	0	0.0534185	0	0
OS05G0307400	7.64226	9.11509	7.81869	10.6714	10.8257	8.93789	8.00338	8.25798	AT4G23400	55.4747	50.2863	45.0175	32.4229	32.2846	28.4221	23.2023	22.1627	26.4678
OS06G0614550	11.0039	11.6175	11.0551	13.1893	10.458	4.24269	4.15244	3.50324	AT1G20450	3.37867	3.63871	2.32731	5.01008	4.23564	2.84728	10.1865	10.173	12.5305
OS02G0220400	0.87456	0.941439	0.742114	5.40587	4.80705	15.7279	10.8979	11.0566	AT3G11010	0.710857	0.647371	0.788471	1.58027	1.02317	1.26404	1.37768	1.23865	0.96476
OS02G0192400	9.33741	10.9421	10.6021	13.9537	16.1785	19.0387	17.3649	19.0716	AT3G51830	3.40159	3.39809	3.35193	3.13107	3.05015	4.07989	7.48618	7.35201	7.41889
EPlOSAG00000016508	0	0	0	0	0	0.319552	0.745287	0	AT5G50740	2.5102	2.64581	2.92155	5.74424	6.48542	4.62793	9.0528	9.00621	11.1956
EPlOSAG00000016500	1.01114	0.851234	1.15211	0	0	0	0	0	AT1G80610	0.674952	0.909636	0.86537	1.87841	1.93107	1.58536	3.38678	3.3622	2.42666
OS01G0286200	0.192048	0.216531	0.194261	0.961525	0.678765	0.391768	0.376236	0.487867	AT2G44070	0	0.0196113	0	0.0466602	0.0225157	0	0.022631	0	0
OS12G0236225	1.54576	1.00387	2.32919	71.6629	39.4008	685.783	656.701	1228.87	AT1G76660	1.70233	2.34262	1.9515	3.53808	3.04038	2.90255	4.67795	5.6808	5.6456
OS08G0418600	0.02221	0	0	0	0	0	0	0	AT1G12080	0.223874	0.26024	0.0656076	1.93493	2.31556	1.05489	1.05109	0.947988	1.2665
EPlOSAG00000046754	9.22159	16.8204	73.5505	112.27	1022.31	23.6682	56.8737	41.2352	AT1G30910	4.9962	5.13912	4.97046	7.15909	6.11958	6.68335	8.22327	8.42849	8.51462
OS01G0824000	1.41754	1.68817	2.12729	2.22844	2.63848	0.716357	0.978366	1.46691	AT2G03110	0.0519913	0.105764	0.0711031	0.18873	0.222619	0.121253	0.427176	0.371004	0.288966
OS01G0233500	1.48281	1.56819	1.86452	5.04745	3.96969	4.37492	4.17584	1.54391	AT3G18350	1.36343	1.28012	1.32023	1.15369	1.39177	1.48665	2.73065	2.73195	2.5039
OS01G0371200	62.9517	41.5318	42.7377	33.0587	38.2731	18.7937	27.5437	17.1665	AT1G49290	0	0.0214739	0.0216546	0	0	0	0.0247805	0	0
EPlOSAG00000048988	4.39588	5.34546	3.81618	11.8055	10.3406	8.20545	7.01707	14.3234	AT4G06665	0	0.0528141	0	0.439804	0	0.103798	0.0609465	0.085506	0.0541114
OS09G0541900	24.5288	23.8576	27.2504	32.647	34.9388	25.6401	22.0557	19.9248	AT2G30520	117.56	123.859	117.358	79.9839	136.405	132.019	51.5499	44.9839	38.7754
OS08G0124500	10.8272	16.797	21.5335	9.96759	7.96123	6.48673	6.03098	6.18032	AT1G55120	0.412129	0.518473	0.400471	0.590543	0.709246	0.574528	0.598308	0.776898	0.892882
OS06G0134750	0	0	0	0	0.0333448	0	0	0	AT1G75230	0.805646	0.725556	0.740271	0.954531	1.43082	0.97301	1.39875	1.56854	1.46927
OS02G0260200	7.30878	6.76384	6.11833	10.4647	8.75968	10.0859	9.98198	12.6645	AT3G01995	0	0	0.0727915	0.21468	0	0.070933	0.333196	0.146082	0.221871
OS02G0224400	23.2194	21.6116	20.1766	10.8531	13.3664	13.8628	12.9251	12.5338	AT3G01990	0.25156	0.419628	0.247704	0.255688	0.470026	0.402298	0.224405	0.215412	0.356532
OS08G0525900	3.84768	4.41939	4.45055	2.85737	3.66689	3.48491	3.41717	4.07081	AT4G16680	1.94601	1.69278	1.94897	2.06927	1.88227	1.72893	1.04593	1.1653	1.26322
EPlOSAG00000050008	0	0	0	0	0	0	0.29176	0	AT3G02340	1.66873	1.21898	1.41597	1.34	2.00184	1.84986	2.11893	2.38573	2.70337
OS08G0288050	6.42574	7.86592	6.73991	9.56171	11.8154	7.931	6.42269	6.41283	AT1G48740	0.0630272	0.0961607	0.113132	0.209725	0.184004	0.299232	0.258925	0.467052	0.591137
EPlOSAG00000040180	1.14696	0.362092	0.560086	2.07918	1.48235	0.722569	0.561746	1.34183	AT1G48745	2.96167	2.73577	2.04585	2.0478	2.04691	2.29568	0.390195	0.497664	0.598387
EPlOSAG00000023168	51.7237	42.9218	54.1237	75.0104	115.688	55.8602	49.2176	80.2205	AT1G17100	61.9399	48.1159	41.5432	119.495	117.36	101.049	61.396	67.9679	71.5786
EPlOSAG00000040181	0	0	0	0	0	0	0	0.224756	AT5G08020	1.39057	1.68198	1.5034	3.89575	3.84755	2.93002	3.92607	4.46635	4.72602
OS07G0617800	49.884	40.0681	38.79	39.6815	32.8765	25.8835	24.246	20.8319	AT1G68238	9.10355	5.8323	3.69861	7.51049	5.45351	6.49933	3.39988	3.06638	3.88104
EPlOSAG00000007051	0	0.367578	0	0	0	0	0.760343	0	AT5G02770	14.9082	15.2426	14.2878	32.1696	25.7695	25.8281	37.3849	40.2644	42.3035
EPlOSAG00000007052	1.37226	1.03972	1.34021	4.86462	5.26991	0.461068	4.30137	2.56864	AT1G68230	0.111837	0.0568768	0.0286778	0.033831	0.163251	0.055891	0.0328174	0.0460417	0.116548
EPlOSAG00000007057	0.408758	0	0	0	1.20751	0	0	0	AT4G02750	0.144773	0.126218	0.1591	0.312817	0.483037	0.258397	0.934607	1.07282	1.29318
OS02G0815300	3.4278	3.7917	2.7768	93.0841	81.5184	136.643	135.347	134.642	AT3G24630	0.947558	1.11439	0.890915	2.317	2.31681	2.48612	3.4988	3.27518	3.20928
OS01G0670800	5.96819	6.74758	6.11781	20.7967	25.6566	15.4814	14.7413	13.2795	AT4G12410	0.115437	0.23483	0.236807	0.1746	0.370713	0.432676	0.203242	0.0712856	0.0300748
OS09G0424701	0.957102	1.53823	1.05371	4.5706	3.62416	1.84177	2.3864	2.57329	AT1G65430	4.09695	3.79729	3.41897	4.54668	4.50122	4.20397	6.886	7.28554	8.03376
OS06G0712400	30.431	27.1191	34.1354	21.9465	19.1936	18.3772	18.389	16.3055	AT1G37113	0	0	0	0	0	0	0.0185381	0	0.016459
EPlOSAG00000046632	0.729556	3.68509	0.712515	7.83713	4.66954	1.63417	1.90567	1.3656	AT5G51420	0	0.0203554	0.0205268	0	0.0233701	0.0200027	0.0704694	0.0988663	0.0417109
EPlOSAG00000046635	0.259617	0.10928	0.33807	0.278889	0.511287	0.290764	0.226048	0.485959	AT4G22000	4.58626	4.3141	3.81988	8.76224	10.8322	6.96216	7.04261	7.4388	10.5291
OS01G0228450	0.28297	0.255236	0.24675	0.70023	0.179125	0.662134	1.22751	0.340503	AT1G53645	2.06803	2.15415	2.24895	4.462	4.78634	4.9683	5.68821	6.64689	6.77699
OS03G0331700	14.0997	12.6652	14.5809	9.64551	8.73722	9.70023	7.87563	8.39529	AT1G04527	0.3202	0	0.328429	0	0	0	0	0.263644	0
OS01G0864200	0	0	0	0	0.0707641	0.362186	0.250288	0.582908	AT3G09240	0.0123777	0	0	0.10484	0.0144544	0.0742299	0.0726422	0.0509573	0.0773946
OS06G0708600	114.449	100.78	115.397	59.9886	53.3344	50.7115	49.5326	40.3396	AT1G04520	6.65135	4.91707	4.50129	17.8388	12.3115	12.7993	6.59978	7.59374	7.71755
OS02G0697650	0.0716852	0.769445	0.315049	0.11551	0.105882	0.120428	0.187249	0.134183	AT2G33730	4.30665	4.56129	5.0556	10.0636	10.9351	8.16479	11.7099	11.378	12.4142
OS11G0672800	0.257658	0.294864	0.117956	0.480049	0.273536	0.270535	0.0736124	0.0904298	AT3G22380	13.5838	14.6335	16.8114	19.1544	19.0965	20.6341	38.6627	40.6242	34.8425
OS06G0158050	0.0288031	0	0	0	0	0	0	0	AT1G79780	0.0343949	0	0	0	0	0.068756	0	0	0
EPlOSAG00000047547	0	0	0	0	0.489249	0	0	0	AT2G33735	2.4754	1.57833	1.85688	5.00699	4.09876	2.95424	4.07639	4.776	4.62028
OS09G0426050	0.365936	0.415888	0.250172	0.11793	0.216201	0.122951	0	0.068497	AT5G48720	1.27637	1.50109	1.25462	2.59012	2.43761	2.4053	3.44886	3.56877	3.5193
OS07G0213800	0.133786	0	0.0261322	0	0	0.179804	0.104838	0.10017	AT4G18540	0.015196	0	0	0	0	0	0.0178363	0	0
OS10G0516300	44.3027	46.238	46.9747	16.7546	17.0698	20.3258	16.8155	20.2989	AT4G39320	0.23573	0.0959079	0.0725364	0.0285236	0.13764	0.16493	0.221352	0.388187	0.245659
OS07G0148600	16.2692	19.3995	24.6608	39.3643	60.8716	16.4104	18.366	16.6195	AT1G26558	0.0181613	0	0.018628	0	0.0212083	0	0	0	0
OS03G0195475	0.176408	0.0848628	0.114858	0.243647	0.0744462	0.0282245	0.0438851	0.0786203	AT4G33800	0.0256649	0	0	0.155274	0.0899126	0.102609	0.21087	0.380371	0.187221
OS01G0914100	0	0	0	0	0.0844536	0.0960559	0.0746766	0	AT3G23560	1.2765	1.04919	0.84642	2.71472	2.58985	1.53363	3.55658	3.77948	2.8621
OS02G0690700	42.1734	35.5039	37.7259	38.5514	37.0331	31.9477	30.9125	25.9878	AT1G48900	9.61395	8.91669	7.866	14.6253	13.4983	12.8169	16.5027	17.7077	19.2849
OS04G0116600	7.86076	6.61762	5.41855	24.6833	24.5689	28.1936	19.106	21.8426	AT1G73120	4.75332	3.53764	1.82334	0.420846	0.947699	1.39053	0.272158	0.127276	0.201363
OS06G0205100	45.2533	37.9584	34.5651	16.4788	23.3053	20.2484	24.9005	22.4927	AT4G27580	0.207164	0.070238	0.0354146	0.334228	0	0.0345104	0.162107	0.142144	0.143927
OS04G0581100	25.5172	18.1064	15.8826	8.87063	8.02754	3.51531	4.82384	2.91788	AT1G19690	1.39568	1.07484	1.24749	3.49821	3.18984	3.66685	4.75076	5.61449	5.58932
OS06G0714800	34.4908	31.1399	62.4896	20.1978	21.6605	10.5633	11.6094	10.5046	AT5G46170	5.66703	5.13506	4.42588	9.79845	7.40726	7.30314	7.64778	9.00054	8.46888
OS10G0149200	0	0	0	0.119524	0.109561	0.498452	0.678144	0.590092	AT4G38950	7.35955	7.69812	7.51296	18.9561	23.1323	26.9114	17.6853	16.8489	14.4321
OS08G0326400	96.6751	72.0237	70.094	136.493	94.1628	78.9695	59.5516	31.837	AT4G32650	0.526958	0.390825	0.337812	0.650909	0.66665	0.460862	0.476776	0.488117	0.514832
OS01G0538650	0	0	0	0	0	0.184427	0	0	AT3G19480	18.0352	16.4146	16.4195	15.691	15.7047	18.0133	10.8285	11.501	11.3067
OS10G0550800	4.28579	6.06974	8.44403	0	0	0	0	0	AT5G11070	7.00913	5.44836	4.76361	10.067	16.104	11.79	12.073	13.7944	17.1029
OS07G0569500	0.561973	0.33007	0.599902	1.01083	1.15822	0.988003	1.31431	0.171243	AT3G56400	0.640401	0.53971	0.394114	3.14385	3.88879	2.85295	3.65099	2.305	3.35594
OS01G0164300	1.05089	1.20264	0.4811	0	0	0	0	0	AT2G16860	6.62351	6.58527	6.82432	11.0109	11.306	9.52779	12.2744	13.3269	14.3647
OS07G0537250	0.0162466	0	0.0158671	0	0	0	0	0	AT1G19340	0.951472	0.98222	0.524376	0.859173	1.04477	1.12133	1.15013	1.30959	1.62791
OS02G0105300	0.26383	0.181724	0.737867	0.521742	0.832517	0.543957	0.642163	0.830558	AT5G46280	2.50718	2.1086	2.47165	5.04905	6.80745	5.82655	6.79032	7.24342	7.09052
OS05G0430200	2.77538	2.6183	2.45742	7.11708	4.75333	5.37006	2.89136	1.7182	AT3G27400	0.355689	0.396239	0.364829	1.82402	1.40433	1.45591	1.37176	1.24118	1.72979
OS03G0840200	9.80101	14.0757	9.87222	23.2744	30.5724	28.9957	27.6948	32.2762	AT2G04700	29.6592	31.4561	26.1607	35.134	31.0456	31.7828	46.0024	51.0813	59.8256
OS03G0194100	9.38961	8.59636	9.14616	6.94783	6.53296	9.8381	10.3431	9.48166	AT5G15550	2.59655	2.39703	2.27246	7.46189	7.943	6.40354	6.50951	8.41225	8.42657
OS06G0543400	7.444	8.53741	7.64857	43.3788	47.8965	55.5386	66.0712	78.5643	AT5G62200	2.58067	2.53438	2.14497	4.79164	3.68912	3.26872	6.63264	7.69342	8.81001
OS03G0387850	0.234957	0.04945	0.107085	0.441697	0.231361	0.223673	0.122746	0.0879599	AT5G61290	0.446901	0.690256	0.577226	0.0801119	0.154631	0.446681	0.388558	0.57239	0.431227
OS01G0610700	17.937	17.5397	17.6079	11.3282	9.87934	9.2939	9.55942	10.2324	AT2G29450	30.0736	26.2806	19.3985	79.5698	74.0967	45.0459	24.4856	28.755	33.7902
OS10G0390701	105.282	101.863	115.504	18.1764	21.3474	18.2594	18.6458	17.9255	AT3G01070	0.0482022	0	0.0247204	0.204138	0.0281447	0.0240892	0.0565776	0.0793766	0.0251162
OS08G0122800	13.8133	19.4482	15.0785	30.8646	31.7347	17.6791	20.5459	20.3997	AT5G08110	1.25001	1.08145	1.13476	2.06886	1.81208	1.62278	2.31887	2.33054	2.52298
EPlOSAG00000019070	1.80441	1.60841	1.24395	1.02619	1.56776	0.178314	0.138626	0.794717	AT3G18280	1.03302	0.661566	0.313946	1.94439	1.20634	1.72086	1.61669	2.17365	2.3923
OS03G0373601	0	0.0662846	0.0512647	0.422905	0.0775312	0.35273	0	0.0982539	AT5G57570	0.130314	0.265094	0.320791	0.756871	0.608711	0.3647	0.550645	0.472106	0.488891
OS04G0653100	40.7936	36.6003	34.2362	32.6988	23.6777	25.0444	20.2849	14.4778	AT3G18282	0	0	0	0	0	0.0446571	0	0	0
EPlOSAG00000019073	12.3503	12.1301	11.3308	18.2926	27.0866	19.281	23.2991	11.9091	AT2G05255	0	0.164311	0.0828468	0.0977341	0	0.0807315	0.284417	0.0665047	0
OS04G0257500	0.109406	0.0828935	0.14959	0	0	0	0	0	AT2G05250	0.0276337	0.0562145	0.0755836	0.0445828	0.09681	0.0460335	0.086494	0.0910112	0.0671946
OS12G0540800	20.9275	17.7024	16.1602	16.7063	15.7182	13.5079	13.9582	11.6339	AT3G49020	0	0	0	0	0	0	0	0.0164777	0
OS01G0731100	9.75911	5.39832	5.33944	5.32411	3.84893	9.07013	8.67519	6.63109	AT5G40950	224.971	205.356	196.31	300.754	281.032	313.887	300.948	339.627	332.492
OS01G0670100	10.3414	11.3635	14.8708	1.79526	1.74056	0.695887	0.494364	0.0935786	AT4G08005	0	0	0	0	0	0	0.127815	0	0
OS03G0117800	9.42567	8.11705	7.27713	15.0719	11.623	14.6968	13.2704	17.4544	AT1G73780	0.209858	0	0.0717503	0.296253	0.245067	0.139837	0.287376	0.345582	0.218697
OS05G0362000	0.0232868	0.0147031	0.102343	0.0281424	0.0687913	0.117363	0.00760343	0.130767	AT3G05800	2.23587	1.86888	1.88461	2.83936	1.29257	1.26121	3.58576	4.90312	7.15162
OS04G0611200	33.4069	33.0882	31.5668	90.2903	104.099	85.1695	76.2498	58.7695	AT3G08590	28.3232	23.6271	20.5865	32.2578	35.6529	33.5366	21.7644	23.945	24.1721
OS12G0639700	3.22629	2.38297	2.48507	8.39636	7.37283	7.30171	6.90091	6.51763	AT2G43050	0.0136949	0	0.0280937	0.016571	0.0159926	0.0136882	0.032149	0.011276	0.0285435
OS11G0114700	10.9287	13.0574	12.7406	12.0329	12.8563	12.2368	12.3341	13.3514	AT2G39550	3.44973	2.98345	3.10318	3.70545	3.23143	4.1487	3.72434	4.48086	4.28713
OS05G0141700	21.3264	27.5469	24.9748	19.9213	20.8558	15.7411	17.634	18.8178	AT4G00240	0.268884	0.247852	0.267175	0.183011	0.235497	0.243556	0.512857	0.505049	0.446584
OS03G0851750	1.21569	1.37234	2.15872	3.53197	2.0949	2.59931	2.67031	0.586132	AT5G03080	3.66775	3.97058	2.684	4.61969	4.25806	4.86649	3.75118	4.41508	4.31399
OS06G0566100	17.7245	15.9626	18.1849	23.6454	22.5935	16.2394	16.4303	15.3104	AT1G15440	1.83408	1.60434	2.14458	6.72436	6.39327	5.28873	5.64025	7.48269	7.18662
OS08G0126000	0	0.0106404	0.0164587	0	0	0	0	0	AT5G38650	0	0	0	0	0	0	0	0	0.0355256
OS03G0859100	52.9325	64.866	56.2326	71.9662	95.1183	16.1374	16.7369	15.0375	AT3G19150	2.00088	2.05318	1.68906	2.07828	2.12981	1.48665	1.1431	1.19551	0.811921
EPlOSAG00000043209	2.67799	1.76438	2.16058	0.187616	2.75165	2.93407	2.58517	2.17945	AT2G10606	2.31562	1.44942	1.82702	0.431066	0.832039	1.60233	2.29982	3.07992	2.59878
OS12G0611100	20.2403	23.2157	28.4566	19.0847	20.6561	13.837	15.1873	13.635	AT3G12860	0.399529	0.362834	0.482973	2.74521	3.83245	1.58307	1.42359	1.87977	1.93308
OS05G0130200	12.8181	15.5202	12.9431	53.4615	35.482	33.6304	38.6301	26.2009	AT1G70475	0.444576	0.0753656	0	1.07588	0.34611	0.814654	0.173941	0.854118	0.849386
OS03G0271350	0.0350577	0.0442704	0.0342389	0	0	0	0.0915742	0	AT4G08850	8.84067	7.67094	7.67585	11.3463	8.85985	8.72005	8.66249	8.7371	7.31386
OS03G0750500	14.7891	15.4988	21.6556	2.7132	3.65567	8.48619	10.3333	13.4047	AT2G37290	0.0955613	0.0224305	0.0603181	0.0444732	0.0257525	0.0367363	0.0776531	0.0302624	0.015321
OS11G0600500	0.0333536	0.0421183	0	0.0537442	0	0.0560326	0.0435613	0.0624322	AT5G45480	3.43077	4.40544	4.50718	4.96844	4.47955	4.32009	6.89114	5.93132	5.78987
OS01G0736450	0	0	0.0768971	0	0.116297	0	0	0	AT1G70470	1.08994	0.572188	0.432753	2.29733	2.29925	2.77621	2.26976	2.83701	4.06706
OS08G0510800	1.26908	1.75601	1.43721	4.76424	5.60349	5.39803	5.71299	5.23114	AT3G13730	1.0047	1.04654	1.06776	0.57123	0.353392	0.483953	0.738819	0.887038	1.34977
OS02G0716600	2.38773	4.26286	2.49278	26.5343	24.8902	23.33	23.0482	23.2719	AT1G78660	4.28887	4.19327	3.85345	5.089	3.82427	3.70522	6.55601	6.62466	7.6051
OS05G0106800	0	0	0.0132506	0	0.100199	0	0	0	AT1G61730	3.3077	2.83316	2.982	11.5015	7.94893	6.42074	8.80699	10.4208	12.5726
OS03G0755100	63.0421	56.0829	61.9135	26.9039	28.7394	32.6464	31.0084	32.9399	AT4G11140	0.212864	0.139186	0.311905	1.43502	1.04757	0.92702	1.24925	1.53983	1.82217
OS07G0585000	52.7524	54.4129	50.8977	55.1095	56.8537	41.4142	41.3977	38.9222	AT5G36150	0	0.0111573	0	0	0	0	0	0	0
EPlOSAG00000014079	0	0	0	0	0.591175	0	0	0	AT5G38360	3.2364	3.18026	2.8507	5.84093	5.2527	5.31824	8.21987	8.28031	8.34604
EPlOSAG00000050062	0	0	0	0.793761	0.7276	0.413779	0	0.461038	AT1G10540	0.025149	0.01279	0.0386928	0.0608611	0.0293684	0.0251366	0.191872	0.165655	0.183458
EPlOSAG00000014073	0	0	0	0.737064	0	0	0	0	AT1G56690	0.0569125	0.0694652	0.0817249	0.247913	0.23926	0.113769	0.50769	0.440484	0.486339
EPlOSAG00000014072	2.81146	2.95856	4.57632	3.77521	6.92108	3.14876	5.50785	1.75419	AT5G46040	0.0305472	0	0	0	0	0	0	0	0
EPlOSAG00000024751	0	0	0.371542	0	0.561909	0	0.248429	0.356049	AT1G12940	0.0290463	0.014772	0.0148963	0	0.0169598	0.0580639	0.0170466	0.0119579	0.0454045
OS04G0549400	1.43104	1.35532	1.95665	4.03532	2.32507	3.60612	3.50438	2.41079	AT1G73870	18.6977	17.0502	15.0953	20.8015	20.0939	17.8801	2.73634	2.15454	1.80144
OS10G0560450	7.19803	6.93879	6.93088	6.15866	5.94482	5.31384	5.57438	6.33823	AT5G16850	0.014368	0.0584567	0.0221058	0.0956197	0.0671142	0.114887	0.177077	0.159707	0.202137
OS10G0560451	0.0258221	0.0978232	0.0504379	0	0.0762807	0.0867601	0.337249	0.0966692	AT3G44150	2.42837	2.06727	2.27418	7.37782	6.38053	5.56667	6.72302	8.25859	8.44468
OS01G0728900	1.13761	1.8146	1.45799	3.11303	3.16604	2.2129	1.84549	1.56904	AT2G26780	4.13659	3.98699	4.25215	7.02711	6.03825	5.92649	8.1258	8.52973	7.671
OS03G0306200	13.1252	13.6743	14.2955	18.7726	18.6418	21.2656	18.8977	21.4577	AT5G58590	7.7355	6.40031	6.26007	12.0221	18.3982	13.0753	6.88605	7.96635	9.63907
OS05G0376300	7.03743	10.9638	9.37418	11.8526	13.7643	8.2998	9.75839	10.1608	AT1G07380	0.805062	0.552482	0.547183	0.833295	1.09871	1.1052	1.75327	1.53337	1.96097
OS12G0291033	2.75683	2.23019	2.48209	6.38568	4.07195	5.06555	5.5696	5.16031	AT1G71780	2.82188	2.32722	2.16428	4.06049	2.79063	3.17623	4.20738	4.62597	4.6098
OS11G0652100	1.76421	1.97679	1.25383	3.99721	2.59969	2.33068	2.16351	2.42634	AT5G58595	1.601	0.651374	1.31371	1.93723	0.747844	1.28017	1.12751	0.790931	1.66844
EPlOSAG00000018684	7.49723	1.77513	3.20342	10.1931	8.9974	4.72314	5.81384	0.438548	AT4G22910	2.03993	2.60001	1.8857	2.59023	2.33806	3.02063	3.08904	3.26592	3.32
OS01G0647000	8.08316	9.56396	7.99385	4.35984	5.73548	11.221	8.7827	8.90017	AT3G08620	2.17179	2.03908	1.80874	4.9638	5.61425	3.84051	2.44022	3.66808	3.40458
EPlOSAG00000020122	0.274452	0.346574	0.268041	0	0	0	0.358448	0	AT5G38420	2070.71	1980.93	1769.88	2051.03	2104.97	2403.28	1373.12	1585.66	1516.42
OS01G0683700	7.41466	8.28779	11.3592	0.669334	1.31912	3.27981	2.90246	3.18789	AT3G48640	0	0.0235842	0	0	0.0270771	0.0231755	0.0272158	0	0.0241636
OS02G0594651	0.306044	0.236867	0.241044	1.43171	0.641604	0.398044	0.257876	0.184794	AT1G66960	0.00850627	0	0	0	0	0	0	0.00700381	0
OS12G0446500	8.63341	9.40819	9.22645	8.239	8.32795	8.93882	10.0697	10.7915	AT4G31985	54.1886	34.9893	36.904	86.487	75.6287	73.897	60.102	74.9642	93.1428
OS03G0213750	0.0862798	0.108953	0.0983086	0.208541	0.0637195	0.144947	0	0	AT1G52270	0.389296	0.35997	0.2178	0.128469	0.578595	0.389105	0.830797	1.07816	1.03267
OS01G0133866	0.491766	0.662393	0.320186	1.53199	2.17908	0.715993	0.042818	0.368201	AT1G80510	1.59301	1.94169	1.8365	2.54884	2.4445	2.64493	3.27602	3.41459	3.27905
OS01G0639900	139.989	133.587	151.762	218.025	314.26	3373.67	3618.28	4266.91	AT1G25230	2.33963	3.37884	4.24994	1.25341	2.02305	2.6598	4.06683	4.95566	7.07257
OS08G0193600	0.941641	0.751723	1.01478	0.575533	0.447628	0.563672	0.720934	0.324155	ATMG00940	0.054337	0.165804	0.111467	0.328742	0	0.162931	0.765341	0.134219	0.169877
OS02G0589700	0.0785752	0.0496118	0	59.1912	112.403	144.048	154.448	149.948	AT4G33110	30.6952	31.4172	28.7944	28.1361	32.5578	42.7439	21.8842	23.3208	22.1626
OS02G0215900	0.426715	0.526874	0.731623	1.11542	1.55468	0.637212	0.74308	0.425993	AT1G77920	1.57885	1.57723	1.14227	0.289975	0.428012	0.366338	0.479842	0.789272	0.969582
OS03G0133875	8.77998	5.48872	4.8393	1.68091	1.1556	1.31436	0.454142	0.976315	AT3G13880	0.178125	0.260442	0.228377	0.444537	0.42902	0.433965	1.64646	1.63162	1.83307
OS03G0749500	119.581	94.5486	118.538	69.5121	69.5948	74.3225	57.2525	95.2727	AT3G20830	1.20593	1.27317	0.767203	0.73883	0.94478	0.854416	1.11087	1.23173	0.795395
EPlOSAG00000015303	0	0.336947	0	0	0	0	0	0	AT2G37120	4.01627	3.54866	2.78793	9.03222	7.76946	6.69049	11.2853	14.1294	15.5157
EPlOSAG00000015301	0	0	0	0	0.915368	0	0	0	AT5G45730	0.0640706	0.0651685	0.0394302	0.170557	0.104748	0.102462	0.22561	0.232117	0.3472
EPlOSAG00000015304	0	1.27685	0.658347	1.6293	1.4935	1.13245	0.880397	3.15447	AT1G70780	13.33	13.0045	12.8226	51.9983	38.46	25.44	23.1219	29.944	29.0414
OS08G0204632	12.4462	9.01195	9.72994	14.1214	13.7455	8.20057	7.00917	5.07621	AT5G65960	4.33009	4.34946	4.7915	6.52214	6.33644	5.45933	11.0085	11.3171	11.122
OS07G0616200	7.82636	9.26596	8.04919	31.0879	33.7895	17.7039	12.2532	8.93307	AT4G05200	0.0247555	0	0.0126958	0	0	0	0	0.0305744	0
OS11G0555600	7.08515	8.43084	7.76797	3.59515	4.74198	3.84837	4.34872	5.2443	AT2G28470	18.9257	18.8926	16.5743	22.6832	23.4982	23.5727	37.7843	33.2529	32.2922
EPlOSAG00000020946	0.900546	1.13719	0.29317	0.483698	2.21691	0.504293	6.66488	0.56189	AT2G27780	0	0	0	0	0	0	0	0.0200055	0
OS09G0337500	2.60509	2.48243	1.83265	6.3464	7.65503	3.98383	3.68066	2.72763	AT1G15710	3.73022	2.87248	3.03607	3.1248	4.12679	3.78876	2.85391	3.519	3.22633
OS09G0518000	20.7199	18.5462	13.5572	39.2777	42.8195	45.2877	52.5031	43.0909	AT1G68510	0	0	0	0	0	0	0.0233508	0	0
OS02G0107300	0.419774	0.583092	0.450965	2.02921	3.26546	1.0578	0.694443	1.12623	AT4G08915	0.0988854	0.30174	0	0.239305	0.115476	0	0	0	0
OS07G0690400	14.7657	13.9013	11.0579	33.3229	28.8551	23.0364	18.2927	14.5209	AT1G30230	54.7212	47.4756	43.4063	166.694	141.38	112.191	111.294	121.208	137.923
OS10G0323900	0	0	0	0.140872	0	0.257023	0.171272	0	AT5G01180	0.25886	0.30091	0.391947	0.730856	0.633371	0.40658	0.868111	0.639414	0.732216
OS10G0510200	0.022057	0	0.301585	0.0710831	0	0	0	0	AT4G04135	0	0	0.103714	0	0.118081	0.101066	0.118685	0.0832559	0
OS06G0326000	0.602624	0.319613	0.447296	1.9615	2.08284	1.64006	1.6843	1.37617	AT5G46050	0.135345	0.225269	0.0883422	0.178658	0.100579	0.172173	0.56324	0.415365	0.26927
OS04G0539701	0	0.129388	0.0500344	0	0.302682	0.258198	0	0.0958958	AT1G24540	0.0594734	0.136108	0.0305008	0.0899543	0.0868144	0.029722	0.0349036	0.0244843	0.108462
OS10G0375600	27.3295	28.4601	29.6883	30.8421	32.7153	38.2849	36.0295	43.2002	AT3G10280	0.0191709	0.0194994	0	0.0231971	0.0447747	0.0191615	0.022502	0.0315696	0.0199784
OS11G0168250	0	0	0.0828384	0.136674	0	0.569974	0	0	AT2G20830	4.73706	4.58684	3.49997	7.36726	8.32898	7.26258	5.56014	6.86418	7.0144
EPlOSAG00000038922	2.0376	0.918945	0.852859	1.87616	1.50481	2.44506	2.47112	2.72431	AT2G26500	321.203	294.622	215.968	340.947	329.047	337.409	224.019	246.569	335.169
OS06G0699800	0.143728	0.302496	0.140371	0.501792	0.530731	0.523157	0.797792	0.403552	AT2G20835	5.03575	3.254	3.09909	2.22227	2.28307	1.89488	3.68552	2.97557	3.08697
EPlOSAG00000038928	1.41725	0.397708	0.153794	1.26872	0.930374	0	0.411333	0.589523	AT4G32590	15.9479	14.4888	12.705	17.9321	19.3468	19.8311	18.7708	19.0682	21.2298
EPlOSAG00000012246	0.613138	0.258087	0.998026	3.62259	3.9244	0.686697	0.800787	1.53025	AT3G07020	2.34658	3.04292	3.11648	4.29867	3.76652	3.46674	5.50862	6.74312	7.05371
EPlOSAG00000012248	0	0	1.194	0	0	0	0.228103	0	AT2G47240	4.65772	5.48742	6.04071	21.8404	19.7309	12.6052	45.9047	44.5921	49.6057
OS06G0679500	20.5485	22.4825	25.6271	15.5681	16.4544	8.65991	7.32767	5.97137	AT2G47245	0	0	0	0	0	0.043501	0	0	0.0453555
OS01G0732100	15.3915	14.3324	12.085	22.4369	22.2432	11.9984	11.7141	12.177	AT1G15990	0.0109248	0	0	0	0	0	0.012823	0	0
OS07G0606800	9.94091	10.8002	8.43083	45.8951	46.0528	16.9952	16.7345	12.5445	AT5G51740	1.41627	1.03969	0.808439	1.40077	1.27996	1.26786	1.01187	1.45004	1.48876
OS12G0612400	32.3538	31.2199	32.039	25.6827	28.5802	19.2026	22.7411	26.2196	AT3G59740	0.0259622	0.0396106	0.106517	0.0314145	0.030318	0	0.0304733	0	0
EPlOSAG00000019374	0	1.07823	0.833906	0	0	1.79304	0.278793	0.799132	ATCG00130	9666.05	10481.2	10700.2	10337.8	10987.7	10744.5	9842.26	9903	9993.18
EPlOSAG00000019370	5.25602	2.51756	1.41607	3.50453	4.81864	2.43583	0.946842	1.35702	AT2G14160	0	0	0	0	0	0.0571991	0.134342	0.0471193	0.0596377
OS04G0191600	0.358023	0.673893	0.837865	1.22999	1.48667	1.0327	1.26162	0.847181	AT2G06935	0	0	0	0.238138	0	0	1.77102	3.72702	4.30701
OS01G0629500	0	0.131849	0.0254931	0.294425	0.655434	0	0.306823	0.04886	AT2G38600	0.0203764	0	0	0	0	0	0.0239169	0.0335546	0
EPlOSAG00000025406	2.56155	4.64986	3.12715	2.06378	6.38469	1.61374	0.209094	1.1987	AT2G27430	0.032154	0.0163525	0.0494704	0.155627	0.150195	0.144622	0.132093	0.132373	0.150788
OS02G0623550	0	0	0.0425462	0.350983	0.321728	0	0.0568964	0	AT5G43250	0.873679	0.63475	0.576083	1.09492	0.655882	0.966811	1.61148	1.46441	1.72341
OS03G0102600	4.38288	4.36621	5.56466	15.1056	21.7948	4.29512	5.85146	7.06457	AT4G29120	4.69911	4.64307	4.40673	8.06868	8.30966	8.00693	8.58859	9.7649	8.46488
OS03G0798400	4.63859	4.60066	3.98001	7.71648	10.4574	6.84616	6.03369	6.60866	AT4G36060	0.116353	0.236693	0.338137	0.30504	0.0679368	0.290738	0.386947	0.383205	0.282924
OS12G0608600	40.7739	38.4761	38.9653	36.4642	36.3714	35.1351	37.9523	32.1793	AT5G59240	0.601719	0.21421	0.370309	0.364043	0.702673	0.781849	0.247195	0.371578	0.219472
OS11G0671100	1.83394	1.44036	2.66481	1.47756	0.528548	0.90174	0.584199	1.17218	AT3G15070	2.88548	3.22318	2.93321	2.7433	2.69267	3.19307	3.81021	4.21072	3.97356
OS12G0420200	8.22612	10.0098	8.73313	101.217	119.1	565.792	545.872	657.992	AT5G66200	6.04455	6.16713	7.97263	8.60267	6.91685	7.52628	7.85145	7.53074	5.90971
OS11G0652600	2.5535	1.96086	2.46858	1.66807	1.1213	0.536222	0.619678	0.41984	AT5G20640	0.0568043	0.0866665	0.087396	0	0.132669	0.0283882	0.100012	0.093542	0.118394
OS05G0367000	5.65728	6.26915	4.48776	7.59034	5.69575	5.89635	4.61415	5.44601	AT1G70505	0.943502	0.931022	1.22774	0.851975	0.93735	1.47789	1.17356	1.31021	1.1887
OS06G0138200	13.2199	14.8453	14.6148	16.7799	17.689	15.6723	16.404	18.4135	AT4G13420	0	0	0	0	0.011672	0.0199804	0	0	0
OS06G0286310	2.5276	1.99033	2.17758	2.3384	1.56148	1.80829	1.75727	1.45715	AT5G41240	1.78981	1.63084	1.70831	2.25592	2.54004	2.38524	3.63263	3.71489	3.58791
EPlOSAG00000018025	50.7736	28.5923	44.2268	61.9134	37.4974	50.7175	46.5982	30.8237	AT4G24780	24.2769	22.4771	15.291	43.3652	32.3572	28.8333	31.9881	30.5637	29.7955
EPlOSAG00000013590	0	0	0	0	0	0.529095	0	0	AT1G49620	0.758286	0.499063	0.594766	1.88904	2.60443	2.58582	2.01568	2.01996	2.74254
OS03G0280000	25.2518	25.6478	26.8158	36.4825	36.1729	36.3171	36.0731	37.3086	AT2G35290	0.0823373	0.27916	0.478567	0.797032	0.480757	0.466348	0.998652	0.790931	1.11547
OS04G0545400	0.134582	0.29741	0	4.82512	3.57811	0.960895	1.09857	1.25958	AT2G44910	0.231537	0.353256	0.197905	0.51363	0.788616	0.88712	0.770007	1.00086	0.824404
OS10G0413900	0	0	0	0	0.0184262	0.0838306	0	0	AT4G17730	4.33263	3.70489	3.89339	8.76849	7.23112	6.5724	8.19073	9.4393	9.3499
OS01G0768300	0.128814	0.162664	0.0898606	0.88956	0.869775	0.463718	0.696981	0.137781	AT5G06400	0.0634734	0.0807012	0.0569664	0.201609	0.222368	0.182396	0.512203	0.535686	0.587053
OS03G0817300	0.273584	0.690954	0.534386	1.12659	0.853088	0.102135	0.119104	0.170701	AT1G75770	1.55331	2.07885	1.48142	4.15474	3.18232	2.94167	2.84677	2.3784	3.54986
OS06G0340600	119.469	116.164	128.988	87.6215	106.483	84.8817	84.2964	92.0912	AT2G07739	0.696652	0.70859	0.900959	1.39271	1.20261	0.42384	0.924356	1.12227	0.662865
OS08G0473200	0	0	0.0138369	0.0456588	0	0	0	0.0530397	AT2G07738	0.300188	0.427464	0.492643	0.290584	0.140221	0.540072	0.916103	0.444898	0.437965
OS10G0202900	0.0416739	0	0.0203502	0.201453	0.123108	1.71525	1.41513	1.40411	AT2G20780	1.23449	1.5093	1.47085	2.39904	2.34442	2.26834	5.79594	5.19513	5.54877
EPlOSAG00000039508	0.11859	0	0.11582	0.191091	0	0	0.309769	0	AT2G07734	0	0	0	0.0234477	0.0226293	0	0.0682355	0.0159554	0.0201943
EPlOSAG00000039503	2.40146	1.34779	1.17268	2.36475	2.56176	0.896521	3.48491	3.24647	AT2G36650	0.0200125	0.0610663	0.0410536	0.0242154	0	0.0400053	0	0.0164777	0.0625664
OS11G0181000	0	0.268068	0.207325	0.912167	1.25421	0.891568	0.600713	0.463585	AT3G01490	3.51508	3.45613	2.77749	4.30054	3.67913	5.29604	6.37213	6.17431	5.71177
OS02G0705000	6.23035	6.04383	5.8716	30.6049	21.7784	13.1187	12.3921	8.55015	AT1G71430	1.24487	1.41969	1.00601	8.26189	7.18056	6.48524	5.00343	4.84542	5.50373
EPlOSAG00000027534	0	0	0.18395	0	0	0.316419	0.245993	1.76279	AT1G55820	0.694846	0.886652	0.881157	2.61403	2.15396	1.43952	1.57184	2.03881	2.06701
EPlOSAG00000027533	0	0	0	0.332868	0.610246	1.7352	0	1.93338	AT1G75950	31.6956	29.3101	26.0622	41.5165	41.9727	43.479	51.8192	59.1088	58.3598
OS05G0280200	103.148	95.1995	94.3729	130.829	125.963	86.8345	98.7598	77.6478	AT4G24420	0	0.0315181	0	0	0	0.0309719	0	0	0
OS05G0182700	62.8212	50.897	53.3612	60.3184	53.8905	46.8898	49.4907	43.8682	AT1G17590	0.289956	0.477496	0.552326	1.11938	1.0803	0.786635	1.58824	2.68299	1.66912
OS07G0196100	4.86132	5.65341	4.76985	6.43666	5.31014	7.02726	8.00284	8.23899	AT1G79200	2.35421	2.57414	2.38452	6.48061	5.25782	4.91199	6.77	7.46279	6.37876
OS06G0289200	2.00652	1.83386	1.37501	0.714522	0.802334	0.633204	0.246135	0.228257	AT2G14290	0	0	0	0.0244152	0	0.0403355	0.0236836	0.0166137	0.0841102
OS03G0825500	10.8448	11.6203	11.584	33.0429	23.0507	14.8745	10.5456	8.91206	AT4G13395	0.183221	0.0745442	0.187929	0.443399	0.427922	0.695897	0.731192	0.301717	0.381876
OS01G0168200	31.1319	25.424	31.0648	5.90751	6.89747	6.8128	7.27595	7.01583	AT4G13390	0.034133	0	0.0175051	0	0	0	0	0	0
OS06G0498000	5.8897	5.77286	6.51908	6.14614	7.53943	5.70109	4.35893	3.25486	AT1G67770	0	0	0	0.0183355	0.0353909	0	0	0	0
OS03G0334000	53.7464	51.127	52.8088	37.5124	33.1712	20.9649	22.2611	16.3211	AT1G23530	0.661204	0.408324	0.532867	0.285737	0.661832	0.519262	0.277176	0.466642	0.541399
OS07G0123700	24.7851	21.6587	23.4731	15.5813	13.9877	12.4082	12.9211	10.5671	AT1G54440	2.01498	1.98459	2.01065	3.12216	2.64052	2.27827	3.94896	4.25655	4.69379
EPlOSAG00000020089	0	0	0	0	0	0	0	0.553245	AT2G24200	13.5488	12.3648	11.6037	16.1998	16.6819	15.4156	20.8531	21.9476	23.6348
EPlOSAG00000033376	5.21798	2.69557	5.55938	6.1149	3.85359	8.76599	8.36378	5.32755	AT1G58340	0.102709	0.18282	0.105348	1.50688	1.06447	0.500458	0.195902	0.253702	0.227449
EPlOSAG00000020087	0	0	0	0	0	0	0	0.553245	AT5G40500	9.34311	12.023	8.8572	6.25215	6.03392	9.16164	17.4052	19.5526	19.7683
EPlOSAG00000021977	0	0	1.78694	0	0	0	0	0	AT3G06080	9.14674	8.88896	8.83605	9.14999	13.5896	11.7333	12.862	11.8	12.5638
EPlOSAG00000033370	0	0	0	0.465514	0.213357	0	0.56597	0	AT1G72200	0.244221	0.0662414	0.166998	0.29551	0.323221	0.211554	0.0955518	0.12065	0.0848357
OS10G0567800	7.34231	4.75108	6.46645	8.62475	7.63635	24.29	25.0346	23.73	AT4G31490	9.66481	9.91819	8.75572	15.6784	12.9684	12.7186	17.7875	19.0854	17.5151
OS08G0119800	59.7193	64.7103	56.9224	266.918	249.724	554.716	539.348	402.49	AT3G06085	0	0	0	0.278166	0.134228	0	0.269832	0.0946413	0
EPlOSAG00000032678	0	0	0	0	0	0.413779	0	0	AT1G63600	0	0	0	0	0	0	0.0260266	0	0
OS08G0430550	0	0	0.158783	0.0873249	0.0800463	0.273129	0	0	AT3G25710	0.846589	0.735519	0.560805	1.25914	1.17399	1.4808	0.78667	1.33602	1.78287
EPlOSAG00000032676	0	0.149754	0.231641	0.191091	0	0.996135	0	0.221981	AT3G25717	9.53186	10.9911	7.7924	2.74067	5.45533	4.71642	5.15094	5.94447	7.86799
EPlOSAG00000032672	0	0.471071	0	0	0	0	0	0	AT2G07085	0	0	0	0	0	0	0	0.0782546	0
OS08G0363000	9.32703	9.16637	7.45565	12.2193	11.5752	9.23109	8.84486	7.8374	AT4G37910	16.2779	14.0042	14.0211	26.6389	30.2372	27.0115	21.3703	23.791	26.3477
OS12G0226500	0	0	0	0.101664	0	0	0.0824017	0	AT1G78750	0.452301	0.352706	0.386603	0.419588	0.440155	0.497286	0.77864	0.732409	0.864145
OS01G0681800	0	0	0	0.0888284	0	0.463053	1.00797	0.67072	AT5G50170	1.34364	1.05754	1.26332	1.97421	1.83992	2.16636	2.4126	2.9831	2.83381
OS06G0711100	19.8411	21.493	23.1287	15.5361	23.2213	21.4853	22.4063	23.3276	AT5G54380	6.31286	6.37132	6.56698	8.8608	7.12468	7.474	5.78438	5.92887	6.41747
OS02G0217600	29.7018	27.6797	27.4117	41.4918	35.0787	31.2297	27.704	25.9375	AT3G44753	0	0	0	0	0.0382809	0	0.134669	0.134955	0.0170809
OS03G0328600	0	0.485203	0.536083	0.176895	0.0810755	0.737709	0.573516	0.205491	AT5G37940	0	0	0	0	0	0	0.022264	0	0
OS03G0363850	0	0	0.00917052	0	0	0.0315491	0	0	AT3G60940	0.0242314	0.0739398	0	0.117281	0.0282968	0.0242194	0	0.0199514	0
OS05G0370200	2.82725	3.24759	2.02932	6.72375	4.55331	3.89128	4.35984	4.08067	AT4G16060	2.5966	2.3421	2.98996	4.14969	3.40412	4.38266	6.98687	7.03914	8.1179
OS12G0109633	0	0.0348565	0.0134791	0.022239	0.0611561	0	0	0	AT1G64100	0.0354489	0.00901407	0.0363598	0.171574	0.196633	0.212589	0.343269	0.262688	0.277065
OS08G0194850	0	0	0	0	0.0733715	0.0208628	0	0	AT3G23710	1.41389	1.18728	1.43336	2.984	2.93744	3.2372	4.57345	4.95444	5.73958
OS03G0454300	3.46685	5.86142	4.06079	11.2654	9.68847	7.16895	6.93471	8.12786	AT3G44750	8.72535	7.25423	7.89896	16.9613	21.8847	18.6934	14.4048	16.4299	20.5578
OS05G0105050	100.692	122.153	125.783	60.0229	68.7966	45.0369	54.2049	64.2356	AT2G14835	4.82366	4.00252	3.96388	7.13372	5.96236	4.86358	8.40992	9.4414	8.23107
OS07G0614300	11.1292	10.7051	12.054	8.18238	7.81289	8.76774	7.25843	6.81198	AT1G53875	0	0	0	0	0	0.127713	0	0	0
OS03G0136600	6.15605	6.94757	3.54346	5.1275	4.61227	7.5441	5.90384	3.78536	AT5G54720	2.54284	2.24035	2.40614	2.53517	2.21665	1.59297	1.02992	0.663497	0.57851
EPlOSAG00000024657	0	0	0	0	0	0	0.275729	0.395175	AT1G53870	0	0	0.0322478	0	0	0	0	0	0
EPlOSAG00000024651	0	0	0	0.312694	0.28663	0	0	0	AT1G27090	7.30732	7.46256	11.4016	13.504	16.1185	11.3466	19.5105	19.1438	19.3224
OS08G0165800	0.609893	0.513442	0.198549	0.532324	1.46386	0.554989	0.331896	0.190269	AT1G48570	1.8223	1.97165	2.01573	5.26391	4.80895	4.25887	7.37095	8.53186	8.08031
OS02G0749450	11.0908	8.49692	7.95383	11.5527	11.892	9.00419	8.5456	7.07927	AT2G41360	0	0	0	0	0	0	0.0312423	0	0
OS10G0568200	0.68532	0.790905	0.780125	2.91796	2.58089	2.56185	2.83337	2.76949	AT1G62990	0.229888	0.0719467	0.145105	0.877294	0.76407	0.848397	1.05857	1.29586	0.958281
OS07G0479600	14.1901	15.4714	15.8397	17.2288	16.0724	20.7037	23.3958	22.9502	AT2G13463	0	0	0	0	0	0	0	0.0292937	0
OS03G0805800	3.39521	2.96821	2.35684	0.286168	0.524632	0.0175502	0.109152	0.117328	AT2G39230	0.0509732	0.0691288	0.0261415	0.246712	0.317468	0.280214	0.339037	0.454673	0.362988
OS01G0708300	17.4441	16.7915	17.6076	11.3267	12.1298	7.92593	8.55911	6.64246	AT4G18910	2.16669	2.81177	1.8392	2.96073	3.09732	2.85638	3.02549	3.32191	2.72511
EPlOSAG00000018725	0	0	0	0	0.359195	0	0	0	AT1G02090	4.0493	4.53958	3.63798	8.27942	9.38832	6.77998	6.43549	8.54205	9.20977
EPlOSAG00000018724	2.16469	1.70846	1.5856	1.74404	0.799336	0	2.12039	3.03895	AT1G06770	1.06384	1.093	0.914824	2.66553	1.66898	1.97626	2.03069	2.6278	2.44126
EPlOSAG00000018728	3.74253	5.67121	9.74696	10.8549	24.3226	23.4726	32.2603	24.2853	AT5G64170	23.1956	22.1878	20.4195	28.189	30.3613	26.2485	17.8271	17.388	15.2498
OS06G0173000	0.662272	0.421789	0.343086	1.24346	1.31845	1.12226	1.27863	0.495864	AT5G24590	2.00473	2.00267	2.69271	4.5194	3.24685	3.94786	5.23837	4.93226	5.09858
OS02G0183500	0	0	0	0.0198823	0	0	0	0	AT1G28310	1.39831	1.4892	1.38362	1.91093	2.22844	2.23619	2.87705	5.13355	4.35447
OS10G0406600	64.7515	64.64	61.0885	34.6591	28.2821	28.3074	23.6325	21.8633	AT3G01850	3.89044	4.15251	4.33526	6.52846	6.30059	6.0008	8.58787	9.05616	8.9595
OS08G0249600	1.1301	2.03867	1.48211	0.780421	0.476915	1.41033	1.09643	0.362631	AT1G65280	2.42263	2.60168	2.98186	3.5995	5.05288	3.14224	4.98618	4.62961	5.74216
OS05G0374000	4.07619	5.56804	4.83586	4.15773	4.61201	4.34574	4.82886	5.93031	AT2G36870	17.2948	14.0787	10.0215	19.3982	15.967	15.3641	8.93064	8.29899	8.10463
OS03G0176300	0.112349	0	0.146299	0	0.276573	0	0.0978219	0	AT1G22590	4.56905	4.31139	4.14441	8.96566	8.40843	8.93552	8.01211	8.37616	10.3261
OS07G0608700	48.7895	38.0167	36.6771	72.7657	50.2432	41.0865	40.6569	24.1095	AT5G42000	3.54847	2.65388	2.64563	3.80659	3.56926	3.91928	3.85004	4.70174	4.75449
OS03G0269300	0.0142678	0	0.139346	0.045981	0	0	0.0186345	0.0133535	AT3G07315	1.18821	0.219741	0.110795	0.522819	1.26142	0.431865	1.01431	2.04562	2.02625
OS05G0171000	0.0565048	0	0.0482869	0.0113811	0.0104325	0.367837	0.239844	0.264419	AT1G13050	0.437347	0.290858	0.310559	0.651316	0.648225	0.67251	0.868726	1.17725	1.20954
OS11G0300600	0.804676	0.733873	0.76405	16.6399	16.491	7.62278	5.86778	4.16302	AT5G01835	0	0	0.0921135	0.108666	0	0	0	0.0369717	0
OS08G0163600	0.196584	0.451352	0.2269	2.33255	1.74218	0.840645	0.746905	0.635589	AT2G30280	2.13496	1.93026	1.75934	3.42235	3.49468	2.64459	3.53399	3.63592	4.29764
EPlOSAG00000009583	0	0	0	0	0	0.33273	0.258673	0	AT1G45474	47.1888	45.6984	42.6828	59.3172	59.9155	60.4441	57.7462	61.9924	62.1313
OS06G0702700	4.24417	3.19288	3.88046	7.49363	6.43554	16.7252	19.961	15.2971	AT4G17085	0.853071	0.663527	1.0294	2.12517	2.22679	1.55483	3.71069	4.91676	8.62855
OS07G0503300	14.6326	15.3817	15.6467	17.1741	17.5782	13.5983	10.0892	10.6039	AT1G72820	3.97455	4.66007	4.83272	3.46266	6.86924	7.03509	7.15888	8.12776	7.18441
OS11G0587100	1.13172	1.0457	0.557136	1.74947	1.9434	1.40661	1.36993	0.792243	AT4G17080	3.40159	3.29924	3.36439	4.48345	4.42627	4.94201	5.04783	6.48177	5.5705
EPlOSAG00000037655	0	0.25271	1.75902	3.54712	5.61617	2.68956	3.92052	3.37134	AT1G64280	1.80067	2.13503	2.04746	3.29937	2.77566	2.56083	6.17155	6.58282	6.3587
OS02G0515000	12.4907	12.2914	11.7687	19.1049	18.3191	25.586	25.3444	26.068	AT4G03260	19.085	19.0683	17.3477	21.7248	19.9198	19.6476	20.3212	21.3683	16.483
OS06G0159900	7.87458	8.50489	10.6442	3.93138	6.9916	11.9773	14.4824	13.1264	AT1G31500	3.40093	3.1275	3.29718	5.48688	4.89639	4.98247	5.4683	6.90466	6.31154
OS04G0468000	0.192019	0.250698	0.670671	0.0419538	0.105757	0.0382726	0.102015	0.00609198	AT3G44220	0.443354	0.325687	0.151582	1.34116	0.949187	1.77254	0.780584	1.80494	2.20747
OS04G0569400	4.12448	4.06227	3.78242	8.71652	7.40601	6.73272	5.91489	3.93585	AT1G66610	0	0	0	0	0.0257666	0.0220538	0	0	0.022994
OS09G0272300	9.03771	8.38509	7.34023	14.0758	14.9196	8.96619	9.32586	8.46828	AT2G09665	0.0532611	0.0270868	0.0546297	0.0322232	0.062197	0.0798522	0.0937732	0.0877072	0.166513
OS06G0688800	0	0.0216222	0	0	0.0505818	0.0862962	0.022363	0	AT5G51880	5.71842	6.09951	4.82725	8.78697	8.12568	8.54812	9.83045	11.1251	11.1802
OS03G0811200	1.19066	1.2348	1.28644	2.81761	2.42984	2.10656	1.82551	0.904407	AT2G41760	1.44311	1.60763	1.39561	2.99345	2.35932	2.48642	3.93621	4.28889	3.92445
OS12G0540200	3.26212	3.72628	3.04	3.6514	3.89877	2.92837	3.62629	3.61241	AT2G03290	0	0.0299975	0	0.0713716	0.0688804	0	0	0	0
OS12G0102900	0.0197245	0.0124539	0.00963187	0.0158915	0.0145669	0.0165682	0.0772833	0.0184604	AT3G14650	24.1733	24.2811	25.5669	28.5361	25.8545	28.0001	34.3252	36.6449	33.497
OS02G0602601	0	0	0	0	0.160319	0	0	0	AT1G06110	4.12983	4.17367	3.02762	5.49365	5.14732	5.45081	8.09455	8.63173	7.76611
OS02G0194900	1.48967	1.60005	3.26093	1.93134	2.2256	1.38074	2.21394	2.0192	AT1G06113	0	0	0	0	0	0.122198	0	0	0.127408
OS10G0528150	0	0.0498155	0.077055	2.41551	2.41811	2.78345	3.2459	3.69209	AT1G75440	3.70887	4.47783	4.14439	4.70669	3.87336	3.49607	1.87581	1.39034	1.72829
OS09G0535500	0.107689	0.0271975	0.105173	0.0347048	0	0.0361825	0	0.0403149	AT3G02360	11.9719	12.0644	10.4244	16.9874	18.3342	16.8238	15.7563	16.9084	17.9
OS02G0811600	0	0	0	0.0350983	0	0.0731854	0.113793	0.040772	AT5G48460	3.1568	3.37676	2.27013	4.67956	3.71363	3.62096	6.68596	7.77846	9.4444
EPlOSAG00000003325	0	0	0.595647	0	0	0	1.5931	0	AT2G07045	0	0	0	0	0	0	0.171113	0	0
EPlOSAG00000031911	0	0.285414	0	0	0	0	0	0	AT3G49810	1.48879	1.41402	1.42592	2.17129	2.04944	2.34542	2.82374	2.34612	2.87695
EPlOSAG00000031915	0.768466	0.776325	0.150103	0.990614	2.0431	1.80739	0.802922	0	AT1G30640	0.941086	0.843993	1.17285	0.942814	1.1817	0.890051	1.18775	1.34976	1.52909
EPlOSAG00000003328	0	0.475689	0.3679	0	0	0	0	0	AT5G37980	0	0	0.0208526	0.0491995	0.118705	0.162561	0.286352	0.267828	0.190678
OS06G0264366	0.150091	0	0.146585	0.161233	0.147794	0.0840489	0.065342	0	AT5G15581	0.373567	0.253312	0.383167	0.602694	1.16331	1.36907	1.02311	1.23034	1.03814
OS11G0483975	0.200121	0	0	0	0	0.0672391	0.104547	0	AT4G38230	0.863264	0.852969	0.910745	1.14901	0.993697	1.14634	1.70807	1.49265	1.32373
OS07G0413700	4.89527	4.59252	4.1664	8.62285	8.01497	7.66138	7.07201	4.91653	AT1G68880	0.148601	0.125956	0.101613	0.119873	0.0289222	0	0	0.0203923	0.0258101
OS08G0270200	3.32773	3.42242	2.36211	7.37985	5.59928	4.95648	3.09161	2.05491	AT1G48175	0.655201	0.871483	1.17176	1.34166	1.17712	1.29296	2.22826	2.48988	3.39648
OS07G0528200	0.0974386	0.225581	1.15781	0.287847	0.479737	0	0	0	ATCG00200	2544.97	2818.23	2789.11	4115.4	4432.27	4291.15	3580.78	3328.15	3692.42
OS07G0135550	0.15068	0.221988	0.196213	0.485595	0.11128	0.126568	0.36079	0.282047	AT1G69740	38.5712	34.8213	36.3796	74.8007	66.9029	72.1599	83.9934	90.647	85.9976
OS01G0773700	195.067	169.782	171.628	796.701	792.088	1567.37	1436.67	1044.65	AT2G34730	1.65711	1.43177	1.72711	2.59803	3.47491	2.12825	2.55156	2.62613	2.76676
EPlOSAG00000032025	6.31792	3.90768	5.41479	4.15526	3.04713	1.29966	4.88355	2.17214	AT1G48170	1.94522	1.75871	2.24152	3.37078	3.28117	3.36045	3.4671	3.93488	5.03034
OS03G0715400	7.23768	6.83531	7.07864	9.30022	9.85755	9.52398	8.12723	7.88684	AT1G63390	0.424408	0.43168	0.816213	0.57773	0.433661	0.424199	0.435882	0.393125	0.276427
OS02G0457500	0.235301	0.279656	0.229805	3.35661	3.55727	2.3834	2.72064	1.8395	AT1G68660	44.6809	40.0263	32.0836	38.6883	42.4193	50.1113	27.8322	29.4935	36.5734
OS04G0228100	3.4992	2.65982	2.80365	8.75874	6.19715	7.76192	6.92175	2.06672	AT1G72790	1.2459	1.27968	1.26539	1.6258	1.14112	1.17204	1.69178	1.4583	1.7439
OS03G0700750	0.557914	1.31716	2.06108	1.1726	0.358288	0.326008	0.253448	0.0908104	AT1G64750	12.1637	10.1757	10.2614	22.2262	20.4928	16.9115	15.721	17.5773	24.0133
EPlOSAG00000000677	0	0	0	0.424064	0	0	0	0	AT5G03690	2.40765	1.80519	1.94739	2.36392	2.5706	2.32395	2.84213	3.30775	2.99653
EPlOSAG00000000678	0	0	0.57732	0.476257	0	0	0	0.553245	AT4G24175	1.33517	1.31868	0.853442	4.12086	3.59288	3.26858	4.45164	5.76753	6.85619
OS10G0428200	3.69085	5.05139	4.08908	9.57405	8.24035	5.69871	5.36378	5.49098	AT1G18600	2.25981	2.54048	1.84733	4.58474	3.7104	4.16076	4.20804	4.60269	4.94017
OS04G0417600	1.07058	1.47076	1.37878	1.74404	1.6508	1.46254	1.76699	1.80575	AT1G76230	0.0330428	0.100827	0	0	0	0	0	0	0
OS05G0388600	17.1664	18.6283	16.3531	25.1736	29.0391	36.4199	40.1702	36.8254	AT4G25470	0.136394	0.110985	0.0279797	0.264061	0.0637109	0.245388	1.21671	0.381829	0.312705
OS08G0486700	0.626702	0.245603	0.464324	1.39288	1.50022	1.08914	1.15719	1.17308	AT1G14580	3.31968	3.21475	3.74222	4.18368	3.33168	4.60074	5.09158	6.40978	5.63689
OS08G0557100	44.3865	43.2157	33.0933	140.914	97.929	88.6322	70.5358	75.3585	AT1G09580	2.46083	2.37784	2.2969	3.45405	2.87369	2.18906	4.88141	5.40988	6.05216
OS01G0902700	1.19955	0.632148	0.747195	1.7046	1.71598	2.90378	2.75092	2.61663	AT3G02090	42.6559	43.2416	37.4409	53.8131	51.2678	50.5105	49.3057	52.2762	52.7451
OS01G0284900	1.02513	0.783101	1.48323	1.59066	2.44882	3.38056	3.0579	4.57211	AT1G32260	2.81888	3.01652	2.74073	4.47678	3.73759	4.28494	5.58339	6.69701	7.09923
OS07G0274700	60.2086	47.1471	46.093	39.3676	24.3073	15.5284	16.5224	12.756	ATCG00800	1851.34	2018.31	2272	3101.43	3131.91	2791.72	3022.63	3073.79	2506.76
OS06G0531600	2.14524	2.33608	2.80765	19.6348	21.8852	17.5819	17.083	23.2803	AT1G73220	0	0.0281603	0	0	0	0	0.0162482	0	0
OS03G0115400	13.2989	15.3098	14.1845	18.584	24.6113	21.036	23.0369	24.3347	AT1G21695	0.228801	0.0775739	0.0782268	0.153807	0.0296876	0.101639	0.119358	0.230252	0.0794794
OS07G0177100	1.6784	1.74098	1.72701	2.72518	2.87116	2.52473	1.62727	1.15408	AT5G65590	0.578427	0.606724	0.741613	1.3998	1.22429	1.26468	1.1457	1.33948	1.82721
OS01G0673650	0.0838936	0.0529698	0	0.135182	0	0	0.219138	0.0785173	AT2G16070	8.9076	7.72453	6.99437	12.8459	14.1712	11.3544	6.29549	6.2009	5.82029
OS07G0514400	1.74186	2.13489	2.18007	1.50951	2.33497	1.70903	2.12201	1.98641	AT5G28220	1.64845	2.0375	1.51959	3.08033	2.5342	2.1899	2.89007	3.74542	4.30558
OS08G0244800	0.0367687	0.0116077	0.0987521	0	0.0678862	0	0	0	AT2G46230	9.01684	6.98273	6.35838	19.7133	16.5124	14.5939	12.8687	16.6201	18.6064
EPlOSAG00000007155	0	0	0	0	0	0	1.01379	0.363242	AT1G13580	1.10692	1.22825	1.12062	1.91342	1.4773	1.83918	2.34542	2.60403	2.71159
EPlOSAG00000007157	0.153693	0	0.150103	0.247653	0	0	0	0	AT2G25920	1.7701	2.04195	1.97057	2.97767	2.7477	2.91275	3.90195	5.02996	4.36418
EPlOSAG00000007151	0	0	0	0	0	0.694081	0	0	AT3G56190	9.62692	11.3963	10.6749	16.3908	16.1985	13.198	22.4657	24.0741	28.1484
OS01G0962650	0	0	0	0.145679	0	0.151881	0	0	AT2G24820	31.6425	31.615	31.609	33.5798	34.7828	37.2835	37.227	39.7537	40.0096
OS08G0239300	355.762	260.214	389.904	42.0847	53.2027	17.0616	21.3332	14.6695	AT5G11840	6.83754	5.78278	7.12948	4.11389	4.8967	4.85188	5.76424	5.30323	4.62569
OS02G0722350	0.0595842	0.0644931	0.0332528	0.0548634	0	0.0285997	0	0	AT4G35230	6.45061	5.84085	5.8504	11.4821	11.9233	9.12421	10.8055	11.9794	12.8542
OS01G0636400	1.51053	1.74081	1.74738	12.619	12.0221	9.14041	6.76125	6.31375	AT4G02195	2.38937	2.25194	2.4058	2.57287	2.86704	3.11122	3.75653	3.55564	4.13478
OS10G0336300	0.0530123	0.0133886	0.0103548	0.068337	0.0626411	0	0.0138473	0.238152	AT4G34450	16.3202	16.4999	15.3222	31.3964	28.4574	24.514	37.6737	39.768	38.1374
OS04G0414850	0.0140027	0	0	0.0451264	0	0.0470478	0	0	AT3G24770	4.47898	4.1352	2.12034	5.14168	3.78201	5.46396	4.69106	6.94074	6.72618
OS03G0654700	0.8633	0.650843	1.22066	0.0207624	0.114191	0.0432928	0.0841426	0.0482373	AT3G17670	2.38358	2.06714	2.11028	2.42877	3.10579	3.93724	4.35859	5.16466	4.88951
OS01G0286500	0.208498	0.451352	0.261808	0.479949	0.439944	0.250192	0.233408	0	AT1G79915	0.141117	0.0287069	0.0289486	0.170753	0.197751	0.112838	0.132509	0.325336	0.235297
OS01G0153250	0.714327	0.917866	0.764958	0.838032	1.1569	0.831607	0.630147	0.621634	AT3G17675	0	0	0	0	0	0	0.242848	0.0567848	0.0718711
OS01G0974900	0.57563	0.726896	0.140546	0.115943	0.956508	1.20879	0.281925	1.21217	AT1G79910	0.484495	0.462931	0.602358	1.54555	1.23443	1.3794	1.77497	1.28138	1.13221
OS01G0561950	0	0	0	0.0383127	0.0351193	0	0	0	AT3G61310	1.57291	1.45643	1.69678	3.4849	2.80589	2.98707	4.13171	4.8097	4.1827
OS10G0478400	2.92759	2.95754	3.43105	4.23674	4.6179	3.11798	4.18429	2.99847	AT1G06800	1.34362	1.47846	1.20275	1.89183	1.81154	1.28192	1.84949	1.86059	2.10032
EPlOSAG00000034687	5.45195	3.93408	7.60658	5.43834	9.97009	6.10604	7.45958	4.37363	AT3G18010	1.10978	0.627111	0.727248	6.21068	4.85992	4.15964	1.773	1.8656	1.94361
OS01G0871900	1.95714	2.90758	2.61416	0	0.170046	0.0967034	0.18795	0.215496	AT4G18465	1.37554	1.31817	1.45752	2.0083	1.89837	2.20432	3.45592	4.12782	4.07533
EPlOSAG00000034634	0	0	0	0	0	0	0	0.630894	AT5G14360	0.0634359	0.0645229	0.065066	0.230274	0.481513	0.126809	0.781812	0.966278	0.561917
EPlOSAG00000034638	0	0	0	0.227623	0.8346	0	0.73798	0	AT4G18460	3.86485	3.89911	2.86838	6.57753	5.50399	5.96715	6.2698	7.19229	7.82606
EPlOSAG00000022675	0	0.50542	0	0	0	0	0	0	AT4G10610	5.8758	4.73554	4.2432	8.41634	6.82886	6.16725	10.5673	10.08	10.186
OS02G0312700	7.92044	8.84856	7.05433	13.9131	12.8025	7.14118	7.00475	5.65678	AT2G40960	5.98263	4.94948	5.3159	2.50039	2.33528	3.01483	3.81426	4.02032	3.38649
OS01G0615000	0.734354	1.34612	0.856014	3.43539	2.72917	1.31328	2.38228	2.97088	AT2G24170	0.254894	0.349439	0.534255	1.44825	1.20358	1.03015	2.64061	2.87433	2.42532
OS02G0814300	2.47186	1.58047	2.65859	2.82341	2.9578	2.73337	0.980768	1.17137	AT3G07870	3.23889	3.09386	2.67214	2.50481	2.63116	2.51946	2.19835	1.774	1.92246
OS01G0877500	4.91592	5.86117	5.33718	6.81567	6.92718	7.07875	9.34072	8.00811	AT1G08180	1.43188	1.25651	1.06551	2.31012	3.01636	3.42359	2.17499	3.83742	2.80882
OS04G0618400	0	0	0.0406123	0	0	0.0698588	0	0	AT5G56700	0.0820526	0.10015	0.117825	0.238283	0.114983	0.229634	0.577858	0.445894	0.564357
OS03G0249700	35.6112	33.3204	27.6438	30.6602	43.7874	48.4784	51.8989	37.6827	AT4G19840	15.3316	14.0403	8.45497	2.3431	3.25712	3.8532	2.56483	2.58907	3.94342
OS04G0624800	0.834119	0.93439	0.827775	0.455245	0.814729	0.203412	0.228422	0.0755482	AT5G41020	1.47476	1.55718	2.11772	2.90615	5.10096	2.02153	3.42905	2.53263	3.48359
OS07G0251900	0.00463937	0	0	0	0.00685255	0	0	0	AT1G67220	0.00638576	0	0	0.0231805	0.00745714	0.00638262	0.022486	0.00525785	0.00665473
OS11G0141100	0.283451	0.357937	0.645936	0.659733	1.44208	0.555549	0.822666	0.736904	AT3G03940	7.73967	8.52325	8.13986	14.4142	14.8378	11.9833	17.0672	19.2162	19.2882
OS01G0940100	3.27046	3.49271	3.42222	6.54969	8.81932	5.60413	5.69925	5.87688	AT5G60265	0	0.0552681	0.0557333	0.0657484	0.126907	0.0543103	0	0.089479	0.0566257
OS03G0725200	0.178436	0.187772	2.75925	7.71521	12.2115	97.5238	84.6347	121.02	AT3G19300	0.411806	0.215415	0.470661	0.925396	0.961795	1.52881	1.64342	1.77285	1.6553
OS02G0118200	20.6803	18.5758	28.7566	6.86857	8.16549	10.0094	10.7445	12.1136	AT3G53100	1.68759	1.20003	0.811862	1.44566	1.43008	1.97037	1.06929	1.73381	2.75473
EPlOSAG00000034095	0	0	0	0	0.43656	0.248267	0	0	AT5G09360	0	0	0	0	0.0183681	0.0157214	0.0184622	0	0
OS08G0355400	0.527417	0.333007	0.715413	4.1391	12.3777	9.6972	14.7078	9.98204	AT5G09365	0.506293	0.257484	0.259652	1.3784	1.33028	0.695811	0.519981	2.70964	2.50619
OS01G0849100	1.07684	0.553555	0.846936	2.91754	4.18045	2.96172	2.16562	1.35567	AT1G63930	0.116943	0.237893	0.137083	0.70751	0.507234	0.283864	0.196089	0.110043	0.208917
OS05G0514250	0.0307141	0	0	0.148473	0.045366	0.0773975	0.040114	0	AT2G28840	2.74963	3.5125	4.18364	3.92627	2.96746	2.7092	35.0271	39.1097	40.5915
EPlOSAG00000035942	0	0	0	0	0	0	0	0.443962	ENSRNA049495564	63.2384	70.5871	87.3971	124.219	103.819	96.0421	135.921	180.55	120.036
EPlOSAG00000035947	0	0	0	0	0	0.199227	0	0	AT5G23320	0.692893	0.768835	1.00144	1.06706	1.10338	1.13327	1.77444	1.89305	1.9693
EPlOSAG00000035949	0	0	0	0	0	0	0.154885	0	AT1G45191	4.60111	4.79598	4.45932	4.32508	5.44707	5.18162	4.13598	3.83016	3.14377
OS01G0576000	0.994169	0.848257	0.918463	1.21229	1.74624	1.08335	0.807134	0.60354	AT2G07792	27.2555	30.6406	37.8875	44.6958	38.5289	39.4293	54.7219	57.2845	47.0899
OS11G0702400	0	0.181588	0.0842645	0	0.0424797	0.338209	0	0.107667	AT5G58050	0.0410796	0	0	0	0.0479717	0	0	0.0169118	0.0107025
OS03G0452300	60.9274	67.4118	47.4224	200.472	150.782	136.617	125.164	111.862	AT5G53390	0.0146338	0	0.0300196	0.53121	0.307601	0.365664	0.257647	0.349421	0.381253
OS12G0291733	0.0961784	0	0.187864	4.22313	1.49163	10.2197	4.5849	0.990163	AT1G77390	0.233615	0.221777	0.271567	0.885719	0.836616	0.809465	0.895741	1.19258	0.990048
EPlOSAG00000038231	0	1.06249	0.547822	0	0	0.235582	0	0	AT2G21520	6.84164	7.87287	7.49924	10.3048	9.02694	8.42026	20.3397	21.9275	21.5597
OS12G0485150	0.888795	1.53245	0.784569	13.8534	14.4407	6.63298	9.7999	6.91064	AT3G09320	1.22879	1.01839	1.64937	1.68877	1.89555	1.89535	3.1873	3.02276	2.95632
OS04G0598200	54.2279	44.8753	40.3679	126.381	78.8389	51.3932	39.4292	14.6147	AT5G60780	0.209913	0.199276	0.186599	0.186264	0.0817104	0.125886	0.131406	0.172836	0.0583345
EPlOSAG00000033087	10.2875	13.304	13.4367	2.79609	0.366147	0	0.647518	0	AT1G35501	0	0	0	0	0	0.632555	0	0	0
OS04G0693000	44.1572	41.6804	41.6689	42.1393	35.0955	22.8376	20.8634	16.7329	AT3G27690	403.214	423.998	416.551	294.886	344.175	536.828	311.867	246.373	216.68
OS01G0932700	2.58402	1.98621	1.70073	0.5431	0.165944	0.660595	0.293466	0.105149	AT5G52100	15.8339	18.2667	15.9844	19.6886	25.7893	25.9257	36.5834	39.8835	37.9302
OS09G0344400	0	0	0	0	0	0.0210946	0	0	AT5G05400	0.279593	0.32501	0.393295	0.405972	0.233215	0.239533	0.450067	0.223631	0.249745
OS01G0672800	34.0763	42.6255	32.6978	17.8902	18.7708	11.6382	10.2013	13.4612	AT1G76490	21.3756	18.9601	19.2568	34.7475	25.8144	24.818	32.3306	34.5567	34.4586
OS01G0200600	0	0	0	0	0	0.0360209	0	0	AT4G36140	2.31652	2.3767	2.32956	3.22956	3.16388	3.29187	4.79377	5.09596	4.08297
EPlOSAG00000034946	0.206577	0.260862	0	0	0	0	0	0	AT4G14910	5.85119	5.30421	5.60356	7.34292	6.14415	6.3292	6.57639	7.09236	7.19748
EPlOSAG00000034940	0.422234	0.266595	0	1.02055	0.623658	0	0	0	AT3G28875	0.106733	0.0542812	0.218952	0.45202	0.249281	0.160021	0.187918	0.131822	0.111229
EPlOSAG00000034948	0	0	0.169035	0	0	0	0	0	AT3G23200	1.4271	1.20963	1.13849	1.31909	1.29619	1.26791	0.604884	0.505916	0.743604
OS09G0491780	0	0	0.0203282	0.0335392	0.0153718	0.104902	0.0271845	0	AT4G33960	2.62408	3.69218	1.61491	0.793792	1.07252	1.44253	5.59539	9.18251	8.52286
EPlOSAG00000045287	782.142	1078.14	598.822	1745.64	2236.93	800.305	899.035	923.404	AT1G56170	1.9646	1.64806	1.28799	7.76876	8.51461	7.24723	1.30751	1.65095	1.68854
OS02G0522800	5.78536	6.48419	5.13467	5.91124	5.74932	4.33555	4.42215	3.11402	AT4G31730	0.253028	0.154418	0.0778589	0.214316	0.0590959	0.101161	0.0296993	0.104168	0
OS01G0135600	0.502201	1.29321	0.673194	2.12619	2.31258	1.09182	1.20891	0.90317	AT1G77540	4.90717	4.04951	3.22889	7.28212	7.02793	8.28255	6.7379	8.80506	10.276
OS05G0417700	2.29013	1.28531	1.11832	0	0.328866	0	0	0	AT1G73040	0.198014	0.0671355	0	0.0399331	0	0.065972	0	0.0815192	0.171962
OS01G0259966	1.37226	1.92021	1.26776	1.67333	1.53386	1.12152	0.823461	2.01326	AT5G46420	20.912	20.6606	21.4904	29.1241	28.5859	30.249	43.3916	48.4712	45.2203
OS09G0535200	0.100308	0.126667	0.0257803	0.187152	0.116968	0.0177383	0.0758463	0	AT4G22120	1.59144	1.44241	1.49496	4.06103	4.13089	4.8507	6.6858	7.03173	6.70776
OS08G0178300	5.52759	5.30931	5.526	7.7567	8.30592	8.1016	7.11698	7.0879	AT1G48820	0.0292357	0.0148683	0.0149935	0.194565	0.290196	0.116885	0.703469	0.830477	0.837845
OS01G0771000	31.601	29.4063	27.4336	3.42986	5.21309	10.2998	4.20565	15.9032	AT4G04745	0.518493	0.362572	0.265908	0.0392114	0.189214	0.0971696	0	0.080046	0
OS02G0194200	17.1811	16.1954	14.4832	20.3442	18.0204	13.5134	11.9903	11.6784	AT5G62165	0.0167791	0	0	0.0203028	0	0	0.0196945	0.0552615	0.0349716
OS02G0150000	0	0	0.0718885	0.059304	0.054361	0.185487	0	0	AT5G62162	0	0	0	0	0	0	0	0.194264	0
OS10G0188000	2.83326	3.36734	2.32317	3.12496	3.82679	2.06172	1.93923	3.06292	AT1G76430	0	0	0	0	0.0159682	0	0	0.0112588	0
OS03G0300200	5.25526	4.88987	4.70479	4.624	4.35775	3.23329	2.73942	2.26509	AT2G12400	0.565473	0.662687	0.51696	0.803224	0.617279	0.688063	1.18316	1.6397	1.49885
OS01G0179400	13.6789	14.045	15.4189	10.4133	11.513	13.4089	12.9121	14.5796	AT5G09945	0.137933	0	0	0	0	0	0	0	0
OS03G0701900	16.2962	17.3224	15.3937	18.1548	20.0385	16.9374	18.7502	17.1325	AT1G19260	0	0	0	0	0.0135972	0	0	0	0
OS06G0474900	15.6868	17.9593	16.7111	21.7976	23.4114	19.7355	23.323	23.7263	ATCG01030	31.2676	29.7515	19.3116	50.8523	49.4699	43.0137	33.1488	27.6826	57.1106
OS01G0176500	3.81906	2.77432	3.06142	12.8701	9.00726	12.2108	8.09859	3.08749	AT5G28850	3.77271	3.98071	4.48124	7.31978	7.3428	6.72902	8.38566	8.61384	7.91973
OS12G0151000	0	0	0.0124505	0	0.0188297	0.0214166	0.0665994	0	AT1G21100	0.156681	0.19478	0.0892815	0.189585	0.0406595	0.191404	0.102169	0.200676	0.253991
EPlOSAG00000048733	0	0	0	0.368532	0	0	0	0	AT5G03390	0.630016	0.558656	0.430804	1.17281	1.28279	1.55004	2.0478	2.58038	2.35685
OS04G0453300	2.04924	0.970406	0.821993	0.589651	0.324302	0.983612	0.95586	0.479479	AT3G27520	0.834565	1.01864	1.07613	3.05835	2.25547	2.3118	2.93873	2.94495	3.77706
OS07G0175600	7.69767	7.96807	6.45901	72.8495	45.9916	26.0821	25.148	20.2128	AT1G10770	0	0	0	0.0343307	0	0	0.033302	0.303691	0.413941
OS07G0139400	156.941	153.39	154.511	161.868	149.14	131.632	136.749	150.239	AT5G08510	0.454851	0.380397	0.259188	0.574835	0.460342	0.484935	0.913534	1.33159	1.32723
OS03G0648400	178.759	167.859	168.752	105.283	105.936	91.818	89.6691	97.3794	AT2G23210	0.44159	0.489989	0.288233	0.72863	0.546931	0.534997	0.581145	0.881435	0.571751
OS03G0117100	92.9844	77.4781	88.2709	105.45	101.484	336.802	338.14	397.989	AT5G57410	0.452416	0.638297	0.913113	0.918266	1.58496	1.25447	4.81349	6.03219	6.11392
OS01G0934700	3.03878	4.22364	4.99945	2.49757	4.12693	0.411144	0.692542	0.687152	AT5G04670	2.76069	2.68403	2.65227	4.08421	3.78696	3.56965	5.03781	5.19185	4.68267
EPlOSAG00000040509	0.11859	0	0.11582	0	0.350326	0	0	0	AT3G55460	7.82032	7.93288	8.49693	14.5128	13.8093	12.0513	17.4923	18.727	21.5056
EPlOSAG00000040507	0.82928	1.39627	0.809909	0	0.204147	0	0	0	AT5G27490	1.78731	1.84011	1.6991	3.21762	2.44352	3.31143	3.35147	3.85851	3.72518
EPlOSAG00000040503	3.8832	1.29043	2.79447	3.29326	0.603754	3.77683	3.47008	0.765126	AT3G04320	0.109895	0	0	0	0	0	0	0	0
EPlOSAG00000040501	0	0	0	0	0	0	0.154885	0	AT2G29710	0.0759369	0.0154476	0.0467329	0.0367538	0.0354709	0.0607196	0.178263	0.112543	0.110789
OS02G0478050	0.869868	1.46251	1.51948	1.61792	2.18054	1.44464	2.03198	2.38189	AT1G51680	20.0938	16.9301	14.4842	28.156	39.6609	30.4989	9.0959	10.8912	10.1578
OS04G0167875	0.220824	0	0.143777	0.118608	0.434888	2.22585	1.34589	1.10225	AT1G20850	1.75669	0.833835	0.66067	3.49545	3.53299	3.82379	2.08483	3.82494	6.65147
OS06G0728500	21.7636	23.7737	22.278	28.4739	29.4432	24.5499	22.8903	25.6188	AT3G11530	2.25739	1.75582	1.7252	1.91024	2.75673	2.15305	2.84012	3.28	3.8439
OS10G0194400	1.19761	0.18904	0.536083	0.643256	0.810755	1.17363	0.260689	0.18681	AT5G50280	2.44151	2.01325	2.49395	5.08181	4.62283	4.82037	6.80466	8.95935	8.53352
OS01G0902000	3.07831	3.74005	3.23409	4.20041	5.17287	2.8661	2.50498	2.93559	AT4G00450	4.08174	4.17502	4.33122	6.3155	6.06443	6.10157	10.4901	10.9732	8.89681
OS02G0241600	10.2332	12.1013	11.1117	17.694	19.0617	15.6186	13.7047	13.9949	AT3G49100	2.11548	2.20296	1.70488	4.11389	4.08794	3.24718	3.22206	4.02279	5.11779
OS02G0613100	1.45864	2.26701	2.44733	0.502217	0.626086	0.0628321	0.097695	0.373378	AT5G48657	0.232404	0.189109	0.206592	0.281211	0.199023	0.0619438	0.0363713	0.0765417	0.0484385
EPlOSAG00000002939	0.274452	0	0	0.442238	0.810755	0	0	0	AT3G47930	4.59425	4.09159	4.29196	6.05497	5.83103	6.11187	8.53183	9.18165	8.82251
OS09G0501650	0.562417	0.468094	1.17346	1.02983	0.566396	0.730101	0.383966	0.239261	AT5G67530	2.72327	3.12381	2.86708	4.71779	5.30963	4.49659	5.77334	5.90693	6.43859
EPlOSAG00000002933	0	0.346574	0	0	0	0	0	0	AT3G08490	0.0221556	0	0.0227249	0	0	0	0.0260052	0	0
EPlOSAG00000002932	2.89491	2.99098	3.85539	0.424064	2.33231	0	0	0	AT3G48470	0.904495	0.863503	0.756839	1.45927	1.35274	1.40366	1.8253	2.03169	1.85211
EPlOSAG00000002934	0.274452	0	0	0.442238	0.405377	0	0.358448	0.513728	AT2G26530	1.03578	0.798641	0.719687	0.909656	1.13152	2.07054	6.3925	4.97942	4.49172
OS03G0181500	121.439	140.27	125.933	277.412	316.088	208.655	177.739	165.849	AT3G48475	0	0	0	0	0	0	0.0335141	0	0
OS07G0582700	0.411756	0.43786	0.465633	0.838083	0.60818	0.41868	0.339646	0.0405651	AT4G19520	1.3579	1.39887	1.34815	3.20188	2.09396	1.87489	4.64359	4.40771	3.99129
OS01G0607400	37.2309	36.6898	37.5495	40.8867	41.3516	45.0293	49.0941	50.2519	AT3G22200	7.70353	7.14259	7.64616	13.237	12.3618	10.4496	25.8344	29.5461	32.7264
OS10G0486900	19.3095	18.0201	17.0586	16.5295	17.4884	19.9731	19.2125	14.9583	AT3G07670	9.9567	10.0257	8.44426	15.0256	13.6988	14.6717	17.4055	18.6591	18.4478
OS03G0213300	45.1314	52.0668	50.7535	56.3243	59.1752	52.6919	53.3273	52.3813	AT1G15720	0.588713	0.430388	0.377401	0.779132	0.623033	0.680364	1.10129	1.03005	1.30371
OS02G0599100	0.378036	0.438248	0.223944	0.499301	0.44853	0.187402	0.469451	0.348009	AT1G25375	1.22634	0.96705	1.42745	1.33383	1.52864	1.74909	2.34513	2.49597	3.20217
OS11G0379251	0	0	0	0	0	0.0287654	0	0	AT3G07675	0	0	0	0.107766	0	0	0	0.293325	0
OS06G0251700	27.3557	29.8242	27.818	42.0831	43.089	33.5611	31.8278	29.6026	AT1G25370	0.278051	0.395942	0.285196	1.00934	1.03904	0.463191	0.870305	1.03786	1.02383
OS03G0202250	0	0.091118	0	0	0.106578	0.18183	0.0471199	0	AT3G62570	0.327013	0.124731	0.307465	0.362715	0.429613	0.463041	0.495785	0.482412	0.553779
OS08G0274700	16.1116	16.927	14.129	29.6199	30.4187	15.9907	13.1539	12.6136	AT3G21781	0.0499322	0.0169293	0.0170718	0.040279	0	0.0831794	0.0390722	0.0411127	0.0867256
OS02G0125566	0.142897	0.481193	0.527222	0	0.117258	0.133367	0.0622099	0.118879	AT3G57910	0.308175	0.287334	0.430239	0.580059	0.939685	0.470591	0.653109	0.725985	0.740442
OS01G0685900	4.00368	3.8085	3.32106	12.3073	8.88712	11.476	9.28615	3.34487	AT5G10860	5.03089	5.29182	4.20365	14.0456	12.3231	11.9701	48.3636	61.4068	66.5195
OS06G0604300	6.79967	5.66622	3.49908	0.789768	0.53021	0.417496	0.586035	0.400571	AT2G37390	0.136187	0.398245	0.47144	3.33694	2.68372	2.89254	5.87447	5.73275	6.17364
OS12G0133800	0.39801	0.579924	0.179406	0.962	0.542657	0.437188	0.0999654	0.229233	AT3G04495	0	0	0	0.127131	0	0	0	0	0
OS01G0871000	0	0	0	0	0	0.0163334	0	0	AT1G70530	2.62317	2.30601	2.43113	1.93844	2.51626	2.42523	5.10227	5.70814	5.21347
OS08G0135800	9.18966	8.83413	8.7499	9.71824	9.24235	9.19985	8.55145	8.0215	AT2G37930	0.560351	0.397891	0.542217	0.818754	0.790175	0.803126	1.25338	1.27096	1.35521
OS12G0488700	0	0	0	0	0.0185467	0	0.0163996	0	AT1G74890	0.473624	0.456385	0.0255681	4.13228	3.90071	3.11441	0.994801	1.21095	1.0391
OS09G0571500	3.14335	3.87797	3.46376	4.41524	5.02467	3.49151	3.87579	2.94191	AT1G52080	0.806796	0.754084	0.659786	1.29285	0.878497	0.828193	0.742228	1.36449	1.54521
OS11G0143600	0.0154683	0	0	0	0	0	0	0	AT2G27229	0	0.0580843	0.0585732	0	0.0333434	0.0856165	0.134056	0.0940385	0.178533
OS12G0163750	0.450273	0	0.390894	0.483698	0.738969	0.336196	0.130684	0	AT4G06695	0.07369	0	0.0755836	0	0	0	0	0.0606741	0
OS02G0568100	0.682701	1.50868	0.802189	0.257829	0.283607	0.143364	0.0557275	0	AT1G61475	0	0	0	0	0	0	0	0.0346574	0
OS01G0906600	14.7054	13.6727	15.0967	13.9099	14.7782	13.551	14.3741	14.0824	AT1G78740	0	0	0	0	0	0	0.0343903	0	0
OS06G0270900	255.312	225.851	244.128	76.5679	89.6202	100.757	102.521	114.011	AT3G44766	0.781236	0.567587	0.343419	1.21539	0.651649	0.557751	1.44097	1.28649	1.62828
EPlOSAG00000045865	15.8496	20.6211	12.4304	341.297	351.158	194.859	125.77	155.981	AT1G61470	0.333157	0.180728	0.318936	0.806246	0.985598	0.88798	0.938506	1.11553	1.27303
OS03G0388300	0	0.00579416	0	0	0	0	0	0	AT3G60590	1.39256	1.40051	1.23576	1.53356	1.31558	1.78286	3.0854	3.72322	3.09811
OS01G0238700	0.00827019	0.0104435	0.0646161	0	0.0244308	0.0138936	0.0864101	0.0928823	AT5G08070	1.07344	0.844628	1.0387	2.18113	2.41247	1.84217	2.51992	2.41806	2.70166
EPlOSAG00000032685	0.144448	0.547222	0	0.232757	0	0	0	0	AT3G44769	0.47605	0.484207	0	0.432019	0.55592	0.237908	0.419075	0.881923	0.620127
OS02G0227600	1.86533	2.29142	2.60251	0.368045	0.112456	0.0426351	0.149156	0.118761	AT5G54620	0	0	0	0	0	0	0.0452946	0.0476601	0.0402148
OS12G0182366	0.207413	0.0654795	0.025321	0.0417769	0.229769	0.130667	0	0	AT4G16957	0.602577	0.891494	1.0301	0.596556	0.788968	0.748287	2.229	2.94679	2.3596
OS08G0288500	9.30236	9.26141	9.17371	11.4705	10.8747	11.2824	10.8899	12.0825	AT3G29580	0	0.0297044	0	0	0	0	0	0	0.030434
OS10G0428500	1.49395	1.1584	1.65103	1.30922	1.5098	1.10078	1.23232	1.44727	AT1G50790	0.420263	0.272023	0.225328	0.543195	0.435003	0.477336	0.795984	0.762844	0.6669
OS10G0553300	38.72	48.6883	48.3859	28.7973	34.9492	18.4231	17.8632	20.4123	AT3G47650	93.2207	80.9282	71.583	143.229	129.685	129	123.048	141.145	146.415
OS07G0558350	0	0	0	0	0	0.123186	0.0478842	0.137255	AT3G51610	4.5541	3.30135	4.67112	6.54563	6.229	6.21164	7.08781	7.81016	8.33812
OS01G0696500	26.8041	23.1733	22.9958	13.9677	14.8011	9.08857	7.82849	8.45801	AT3G14463	0.398472	0.709274	0.749304	0.723232	1.3572	1.39396	1.75391	2.46067	2.2493
OS01G0870500	0.0640625	0	0.0278072	0.0802878	0.809553	1.92525	2.50077	1.87866	AT4G11270	3.39873	3.58701	3.67731	4.34455	3.63302	3.7538	6.68423	6.96094	6.45089
OS06G0714100	129.936	123.756	102.275	225.127	180.393	105.517	104.585	76.3635	AT2G32340	1.69929	1.58874	1.81338	1.99385	2.00443	1.50974	1.24911	1.597	1.46678
OS01G0164400	11.4975	12.3515	10.6702	17.5748	14.9923	12.6185	14.0762	12.367	AT1G07180	45.9441	36.4391	31.9761	42.1485	47.7152	54.1886	10.2614	8.4541	7.74081
OS10G0550300	0.0235293	0.0148562	0.0919186	0.815148	0.60819	0.375518	0.322669	0.0880856	AT5G23310	7.95211	7.95861	8.48358	30.4358	27.5609	28.605	41.3534	49.3341	50.7416
OS03G0333000	12.2781	10.9053	10.8123	10.9728	11.8565	11.336	10.3357	8.99989	AT5G38540	0	0	0	0	0	0	0	0	0.0251953
OS06G0645700	11.9953	10.5912	9.05473	17.442	20.1882	18.3452	16.3531	14.0444	AT4G28350	0.262921	0.120342	0.134839	0.111348	0.291681	0.105117	0.277745	0.140713	0.191797
EPlOSAG00000029745	0	0.275684	0	0	0	0	0	0	AT1G52330	0	0	0	0	0.0270771	0.046351	0	0	0.0483271
EPlOSAG00000029747	2.00121	1.51626	1.17268	1.93479	4.13823	2.68956	1.82958	0.374593	AT5G53500	5.42486	5.42356	5.8321	8.31729	8.30241	7.03873	12.7151	11.8672	13.3082
EPlOSAG00000029742	0.515749	0	0	0.207763	0.190446	0	0	0	AT1G80410	15.3909	16.1097	14.9734	33.7895	29.1365	29.9665	32.6021	35.4195	32.2174
EPlOSAG00000029748	0	0	0	0.377521	0	0	0	0	AT2G37640	6.92409	7.80991	5.70946	7.11875	9.93547	9.06171	12.3236	12.7685	12.5922
OS03G0377700	3.08998	3.04161	2.89597	4.43785	5.0743	2.19249	2.09303	1.1496	AT3G59765	0.549289	0.372467	0.206581	1.26283	1.19737	0.841828	2.81532	3.24125	2.93845
EPlOSAG00000040496	0.948723	0	0.579102	0.955453	0.350326	0.796908	0.154885	0	AT3G22170	4.7754	4.76712	5.36892	6.88911	5.94335	6.77724	9.83973	10.4166	10.1293
EPlOSAG00000028298	0	0	0	0	0	0	0	0.461038	ATMG00860	0.169163	0	0.173509	0.204688	0.131696	0.169079	0.0661851	0.0928556	0.176288
EPlOSAG00000028297	0	0	0.166043	0	0.251119	0	0.444094	0	AT5G58470	1.71614	1.69167	2.32526	3.57628	4.16896	2.64706	4.94879	4.03845	5.15553
OS03G0807400	10.0541	12.8599	9.71463	17.4818	15.3834	9.19836	9.50775	11.22	AT3G63480	1.08136	1.17734	1.17163	1.25317	1.51178	1.78108	1.91281	2.42027	2.39665
OS11G0156200	0.0107208	0.0541521	0.0732925	1.08832	1.40932	0.630367	0.588078	0.642159	AT3G30720	1.40944	0.756618	1.08424	1.61069	2.37743	1.87833	1.83815	1.86968	2.48881
OS03G0851800	3.65193	2.89703	3.38372	5.78395	4.77166	11.5361	12.1074	11.9772	AT3G30725	0	0.0486792	0	0	0	0	0	0.0394058	0
OS11G0701600	6.21996	5.63748	11.8554	2.90977	4.96402	0.337073	0.786151	0.938928	AT1G78290	4.93877	3.61743	3.17528	9.91347	9.53381	9.48409	1.58866	1.32782	1.18541
OS02G0456000	7.45513	7.91784	6.87092	10.6597	10.3362	9.21688	7.06798	6.60186	AT3G57920	0.942776	0.902523	1.09973	2.68416	2.52571	2.42045	2.10469	2.08523	1.65674
OS07G0545500	1.91573	2.79325	2.28087	3.11874	3.94542	3.01928	2.75353	2.97595	AT5G45070	0.0179912	0	0	0	0	0	0	0	0
EPlOSAG00000009246	0.174651	0	0	0	0	0.586814	0	0	ATCG00780	2907.99	3095.28	3480.05	4249.7	4315.44	3849.45	4131.52	4138.19	3530.53
EPlOSAG00000013411	0	0	0	0.825512	0.567528	0.43033	0.334551	0.23974	AT4G22290	4.5346	4.71288	3.89767	6.56379	6.43366	6.26907	8.73821	8.3164	8.59735
EPlOSAG00000013414	0.865389	0.65568	1.01421	3.62556	5.62415	2.61687	4.06886	2.59178	AT5G66120	16.1408	16.3344	15.2027	19.7445	19.7381	21.0121	16.663	18.3841	16.5656
OS11G0600700	38.9981	38.6646	40.0084	31.8006	35.7158	27.6396	25.8754	25.8708	AT5G40190	2.76484	1.96582	2.0099	4.02758	2.19427	3.11227	5.13569	5.65807	6.15423
OS07G0692900	3.10464	3.17635	2.83495	6.01374	3.28009	2.9424	3.43483	2.23671	AT5G09420	0.459155	0.651374	0.582496	1.12579	1.2417	0.821242	0.936047	1.2834	1.30957
OS01G0241400	3.39193	2.84381	2.85109	0.358399	0.246394	0.326951	0.0726232	0.104084	AT5G27030	2.47462	2.60817	2.31196	4.00354	4.37092	4.95369	5.84965	6.58366	6.03408
OS12G0583300	0	0.142894	0	0.769865	0.817122	2.76701	1.59284	0.706039	AT5G51230	4.25577	4.0455	4.08975	7.54381	6.90892	7.22528	9.22016	10.3894	10.3622
OS02G0317700	4.3618	7.13667	5.72946	10.9683	11.9194	9.26865	11.3818	11.132	AT2G46685	0	0	0	0.191444	0	0	0	0	0
OS11G0703600	2.22415	2.43605	2.0392	8.33801	6.90554	12.7345	11.1896	13.1481	AT2G46680	2.77362	1.87458	1.44116	1.3027	1.85388	2.09743	1.11374	1.11181	1.23605
OS05G0248200	0	0	0.0160917	0	0	0.0276799	0	0	AT1G63250	0.455711	0.624743	0.365808	0.994944	0.832958	0.752542	1.3256	1.2317	1.31115
OS07G0418150	2.12293	2.32632	2.55312	5.00396	3.70578	3.12432	1.78733	2.03614	AT1G06340	0	0	0.0672878	0.0793792	0	0	0	0.0270074	0
OS03G0337200	1.91536	2.48384	2.82798	5.29973	6.62021	8.76478	11.0422	10.2366	AT1G09130	29.0273	28.3565	27.8611	38.8491	36.3269	40.2755	43.2138	44.9773	43.3975
OS02G0720400	0.81013	0.60894	0.75353	0	0.0569808	0.324044	0.0503842	0.108316	AT3G23160	1.61427	1.52381	1.16737	3.07749	2.9565	2.75104	2.00381	2.28537	2.51735
OS11G0257800	0.223509	0.423366	0.228211	0.0327411	0.0450181	0.0512027	0.278645	0.266236	AT1G72650	4.37705	4.65989	3.84974	6.3113	5.68912	5.5573	6.79121	7.30528	7.25119
OS03G0125700	20.3908	14.8902	20.6448	14.3661	12.2341	14.5913	12.3954	13.5661	AT4G17670	0.546008	0.77268	0.267845	1.57988	1.46929	1.39994	1.5604	2.13056	2.25128
EPlOSAG00000005684	0.249502	0	0	0	0	0	0	0	AT2G42190	7.5518	7.74133	6.62415	6.67003	7.73156	8.99566	7.37219	8.60289	10.3186
OS03G0815266	0.131587	0.0830827	0.128513	0	0.291539	0.22106	0.0859292	0.369462	AT5G10650	1.08056	1.2273	0.81277	2.10287	1.65092	1.49403	1.26831	1.39386	1.3982
OS04G0653600	0.83917	0.845498	0.261564	1.10765	1.06807	0.539912	0.617956	0.233947	AT4G39050	8.72124	8.42046	7.78196	11.4733	10.9759	10.6387	12.8181	12.9266	12.195
OS03G0411900	0.0653087	0.178687	0.0318916	0.140314	0.0803864	0.237718	0.483346	0.468613	AT1G22690	50.8012	48.5206	35.7127	35.357	31.0395	29.9801	19.0083	21.2764	25.3882
OS05G0106100	159.234	147.751	149.267	85.9021	88.09	44.7231	46.6234	39.0806	AT5G20910	1.70606	1.30683	1.44745	1.58012	2.04149	2.421	2.81834	3.46845	2.96321
OS09G0267500	3.12416	3.26566	2.79379	7.67945	7.09613	5.18389	5.24917	3.88489	AT1G28490	3.16685	3.46052	3.07265	4.40153	5.17244	4.59823	5.19893	5.814	6.97956
OS06G0207600	1.28078	1.34322	1.63248	4.26747	4.26448	2.77162	2.80683	1.25965	AT4G31265	0.7369	0	0	0	0	1.10481	0	0	0
OS12G0502700	4.12827	4.5925	4.45946	6.07615	6.83674	5.61431	4.57479	6.84094	AT2G38195	0	0.0538538	0.0135768	0	0	0	0	0	0
OS06G0611000	6.47185	7.48964	6.0869	6.18562	5.526	6.13623	5.11784	5.52607	AT1G23340	0.336912	0.182766	0.241899	0.543557	0.48524	0.808191	0.540452	1.04489	1.08842
EPlOSAG00000003652	1.28078	0.269557	0.62543	4.81548	1.26117	0.358609	0.278793	0.399566	AT3G03200	0.0578219	0.0294064	0	0.0116609	0.0225077	0.0288967	0.0226229	0.0555437	0.0602574
EPlOSAG00000003650	9.397	5.53764	3.26311	0	0	0	0	0	AT3G23910	1.85394	1.72108	1.6752	2.43913	2.28526	3.16191	3.17775	4.31291	3.35805
OS11G0707600	136.043	171.161	142.269	83.4878	78.3207	50.5392	51.6283	53.6434	AT5G66380	1.33034	1.38784	1.32954	2.33205	1.99172	1.80701	2.14206	3.17375	2.86163
EPlOSAG00000004158	0	0	0	1.28986	0	0	0	0	AT4G00900	2.73287	1.91554	1.3725	7.14475	5.15912	4.05483	3.17448	3.56179	4.08752
OS08G0398800	5.84551	4.09845	3.74917	1.60266	2.73197	3.10729	2.66638	3.26621	AT5G36670	0.0176527	0.00598506	0.00603544	0.01424	0.00687146	0.0235253	0.02072	0.0048449	0
OS07G0587500	9.00073	8.99181	8.2734	5.41481	6.54349	5.84504	5.08036	5.54179	AT4G00905	0.798744	0.476861	0.605547	0.714361	0.466377	0.798351	0.468765	0.915008	1.33906
EPlOSAG00000011620	2.53739	0.457739	1.77008	56.6566	86.2001	110.83	83.3221	67.1723	AT4G24990	4.62018	4.36841	3.493	5.3805	4.91406	4.01086	5.2702	5.57223	6.8492
OS03G0693400	15.4523	19.4205	15.9973	7.59166	9.98763	6.6436	6.12139	4.75214	AT3G60330	0.13265	0.04762	0.0320139	0.415434	0.164018	0.0467948	0.238128	0.546102	0.463503
OS05G0126800	34.8286	31.1952	31.8501	15.2531	15.4271	9.9978	9.88525	8.22391	AT5G11300	0.126013	0.128173	0.11489	0.355781	0.29431	0.209919	1.08466	1.15284	1.12352
OS12G0500700	10.4173	8.79321	8.54829	12.6956	12.7848	9.71739	10.0728	8.23077	AT5G54680	17.5786	17.1762	17.6964	23.2643	21.1693	23.7316	21.5404	23.905	23.0047
OS03G0445700	5.39674	4.89522	6.7925	2.90889	2.46996	1.27694	0.14891	0.320127	AT3G18970	0.544847	0.797483	0.558848	1.06127	0.900074	1.44778	2.01214	2.19929	2.20194
EPlOSAG00000000303	0	0.425617	0.987521	0.5431	0.497832	0.566224	0.880397	0	AT5G14820	0.0775125	0.105121	0.092755	0.125055	0.12069	0.129124	0.181961	0.13828	0.242332
EPlOSAG00000020364	0	0	0	0	1.86075	0	0	0	AT4G31196	0.537937	0	0	0	0	0	0	0	0
OS01G0661700	1.47483	2.87936	1.60148	1.51656	1.37583	0.456411	0.443534	0.490376	AT2G41550	0.719167	1.12649	1.07696	0.817988	1.14216	1.50951	2.43108	2.58173	2.41325
OS08G0426100	0	0.0214502	0	0	0	0	0.0221851	0	AT1G18290	0.0242314	0.0246466	0	0	0.0282968	0	0	0	0
OS02G0181700	7.12485	8.17088	6.19513	1.99154	3.78531	0.519083	0.356074	0.102065	AT4G37850	0.0195613	0	0	0	0	0	0	0	0
OS05G0548400	0.816848	1.15052	1.05858	0.759363	1.27613	0.923644	0.718067	0.852712	AT3G13090	0.0630439	0.0524653	0.0470283	0.0624141	0.0669283	0.0458276	0.0672711	0.0566275	0.035836
OS01G0580400	0.0445487	0	0	0	0.0329002	0	0	0	AT1G26330	0.224936	0.36745	0.349569	0.758789	0.692505	0.763042	1.22409	1.15613	1.0584
OS01G0740600	45.9355	38.4119	43.4193	18.9841	26.6787	17.3787	21.2311	14.2153	AT1G17960	0.117969	0.11999	0.0691428	0.0815676	0.118081	0.0673774	0.0395618	0.0416279	0.0526875
OS09G0554101	0	0.067577	0.0522643	0	0	0	0	0	ATMG01140	0.117198	0.178809	0.120209	0.354526	0.205291	0.23428	0.0687806	0.289491	0.122134
OS07G0644200	1.64604	2.07859	1.94059	10.9504	13.9798	8.13782	7.44755	6.75643	AT4G32551	5.29686	5.40261	5.27429	10.6702	10.6677	10.1761	13.524	13.8542	13.6502
OS04G0274400	11.2796	10.3934	10.0374	10.17	9.98371	7.16421	7.54689	5.18859	AT3G12700	1.33279	1.54311	1.52701	4.52926	4.28838	3.57125	8.20462	8.06691	7.2106
OS06G0253600	2.07486	1.31005	1.83876	3.74576	3.29166	1.32327	2.13276	0.934984	ATMG00090	81.3505	86.1989	106.142	183.314	156.803	144.634	202.175	259.749	205.098
OS07G0148900	69.9188	68.2849	67.7845	955.368	846.318	2347.81	2281.38	1898.55	AT1G05837	0.026763	0	0	0	0	0	0.0628265	0.0881435	0.0278903
OS04G0660100	1.45393	1.224	1.85928	7.60824	6.88835	5.06061	5.67398	5.11167	AT1G05835	1.39199	1.50719	1.10536	15.8109	10.33	14.0926	16.0223	20.9999	19.8407
OS03G0152600	6.99139	6.72657	6.19692	8.83575	11.3101	61.8517	62.1784	49.5242	AT3G54350	3.17575	3.35578	3.38403	7.43988	8.07642	6.98321	10.6546	11.7522	10.903
EPlOSAG00000014569	0.240146	0	0	0	0.70941	0	0	0	AT1G01390	1.59682	1.16226	0.961673	0.62042	0.923808	0.805336	0.292318	0.530733	0.488536
EPlOSAG00000023501	409.482	451.239	436.907	436.931	468.616	522.851	479.603	494.206	AT1G05830	3.63215	3.54018	4.37987	7.09305	5.69472	5.94747	8.44495	9.00301	9.17648
EPlOSAG00000023502	0	3.91293	1.21051	4.99301	0.915368	1.04112	4.04699	0	AT3G49640	3.04984	2.77474	2.34223	5.52624	6.03133	4.94781	4.58714	5.12325	6.2448
EPlOSAG00000044538	0	0.194081	0	0	0	0	0	0	AT1G78430	0.148147	0.251142	0.388326	0.85646	0.768897	0.822631	3.09134	3.7407	3.9969
EPlOSAG00000011805	0	0.397708	0	0	0	1.05819	0	0	AT3G49645	1.03603	1.43881	1.24657	1.73576	1.48904	1.45371	3.15703	3.6418	2.78221
EPlOSAG00000011801	8.14053	1.23357	4.45221	12.0679	14.4287	8.75248	8.93081	3.04754	AT2G43945	32.7141	30.8948	29.4155	33.1429	30.7577	37.032	34.9717	36.0382	31.4971
EPlOSAG00000011800	0	0	0.62543	0	0	2.15165	0	0	AT4G37690	0.02753	0.0140009	0.0141187	0.0666233	0.0964467	0.0137582	0.113097	0.0680022	0.114758
OS08G0552700	1.24751	0.840179	0.812246	1.07209	1.65836	0.489012	1.03189	1.8681	AT5G09285	0	0	0	0.125175	0.120806	0.103398	0.121424	0.0851771	0.215613
OS03G0773150	45.4444	38.9721	35.0015	59.2404	40.9692	34.9319	29.2732	13.8645	AT2G46020	7.26548	7.11561	8.07107	13.6959	12.592	11.8738	16.8392	17.9349	15.4981
OS03G0351300	124.774	141.661	134.764	30.9567	36.4437	47.5206	38.2522	50.9391	AT4G19100	14.5544	14.0212	11.7718	22.0332	21.3015	23.0385	25.926	29.8536	30.7692
OS03G0112400	61.9209	60.6232	61.1056	85.6514	83.9204	53.6948	55.2741	52.1675	AT1G19520	3.2485	2.88313	3.11046	6.33706	6.75687	5.39651	6.79147	7.424	7.88658
OS01G0232450	0	0.025114	0.0388466	0.0320463	0	0.0334107	0	0	AT4G36690	15.6936	14.11	16.0617	22.2468	24.9617	22.7846	32.7804	31.4082	34.4642
EPlOSAG00000014381	0	0	0	0	0	0	0.533858	0	AT3G52460	0.0984511	0.0400552	0.141373	0.262079	0.137962	0.137764	0.046223	0	0.102598
EPlOSAG00000014385	5.40328	4.54878	0.58634	1.93479	2.66029	1.00859	13.3298	4.49512	AT1G33670	0	0	0	0	0	0	0.0218329	0	0
OS01G0303300	0	0.0280789	0.0868652	0	0	0	0	0	AT1G02110	2.03412	1.69065	2.146	5.42893	5.22586	4.25211	6.64423	6.65147	5.79006
OS02G0175950	18.3304	12.4639	16.0087	55.3812	35.1451	40.2694	47.4203	62.0244	AT3G02150	3.52131	3.68834	3.27367	3.77128	3.67464	4.55299	2.35678	2.67727	2.20178
OS05G0270200	12.8944	11.499	13.0325	16.4286	16.3585	16.5908	14.9608	13.8081	AT1G28010	3.76491	3.69805	3.53709	13.9637	12.79	7.94567	6.42018	5.63089	5.23581
OS08G0433350	0.151273	0.286537	0.369348	0.853137	0	0.762396	0.987847	0.991049	AT5G04250	0.21903	0.252487	0.179726	0.282697	0.596814	0.277301	1.42255	1.87556	1.64344
OS01G0554150	0.384783	0.45119	0.53685	0.398584	0.324766	0.415555	0.17948	0	AT5G22920	2.23247	3.72399	3.57215	4.23566	9.32273	4.08788	25.5749	17.161	26.3174
OS07G0408100	4.8426	4.24803	3.86694	10.3935	8.03217	6.65167	4.83423	3.9936	AT3G13540	0.0201173	0	0	0.121711	0.211432	0.221181	0.354192	0.347844	0.461222
OS12G0551200	0	0	0.00685027	0	0	0	0	0	AT2G25300	0.626274	0.687296	0.777603	1.03699	1.07778	0.889531	1.89577	1.95406	2.31864
OS04G0319600	11.4251	9.88625	10.8785	12.9912	13.6163	9.8553	9.82316	9.65048	AT2G19990	0.387935	0.197291	0.165793	0.430289	0.453021	0.226184	0.15178	0.292796	0.269517
OS04G0636700	5.2817	4.73924	4.51249	7.61116	6.6977	5.90093	5.56339	6.18907	AT5G24640	0	0.0502899	0	0.598262	0	0	0.0580336	0	0.0515252
OS04G0592700	2.84707	2.28159	2.00819	4.4994	3.27973	2.83094	2.37565	1.20705	AT3G16920	0.166854	0.101828	0.0855707	0.484548	0.506604	0.700441	0.254599	0.673174	1.0259
OS10G0473400	43.3566	43.0538	45.149	32.4966	35.9531	46.9325	50.1084	52.3411	AT3G27580	0.659852	0.660506	0.569378	0.925163	0.831715	0.63859	1.1802	1.58679	1.24431
EPlOSAG00000009694	0	0	0	0	0	0	0	0.370731	AT1G10360	14.3203	12.792	14.5257	26.3113	25.3621	26.5403	27.0115	27.9327	26.1849
EPlOSAG00000016129	0.835289	1.05479	1.63156	0	0.616879	4.20975	1.09093	2.34528	AT3G55850	1.87631	1.83212	2.16509	3.47363	3.60436	3.44132	5.17546	5.523	5.45538
EPlOSAG00000009699	1.97767	3.2109	1.65555	4.09721	1.6692	0	0.73798	0	AT1G26590	0	0.014917	0	0.0177456	0	0.0293169	0.137711	0.144903	0.122267
EPlOSAG00000016121	5.32371	4.38437	4.52118	11.1892	8.54711	2.72197	9.37146	4.33264	AT5G43980	0.0209968	0.128139	0.0861452	0.0762189	0.245195	0.188878	0.369676	0.518643	0.262574
OS06G0594400	0.647435	0.166851	5.32949	1.85229	4.80096	11.4316	9.56024	19.2418	AT1G34020	2.1505	2.29302	1.81149	3.11753	2.75394	2.82439	3.64601	3.75516	3.72431
OS07G0567400	26.1238	26.1856	22.853	44.1583	31.3492	28.5179	25.3568	31.4706	AT1G08770	3.09737	2.39649	2.03652	3.26736	2.68959	2.88416	2.61014	3.37858	2.64848
OS04G0664900	1.84925	1.3622	1.98666	0.0496631	0	0.0172592	0.0670891	0	AT1G01640	0	0	0	0.0578072	0.0278947	0	0.0560751	0.0393358	0.0248932
EPlOSAG00000038748	0	0	0	0.192278	0	0	0	0	AT3G27260	7.16292	6.83943	6.6761	10.7037	9.77121	9.49536	13.9969	14.3503	13.6491
OS03G0192800	16.5021	17.5137	18.9423	17.7847	19.8748	15.3016	17.394	17.2498	AT1G21640	14.5561	14.9759	13.9931	11.9846	12.5531	13.9402	13.645	16.2664	14.0585
OS04G0420801	0.841878	1.1269	0.764658	2.36041	1.45488	1.75376	1.72627	1.73344	AT5G25940	7.0246	6.53389	6.8733	9.28273	7.55554	5.68158	8.19092	9.24655	7.51312
OS06G0119900	0.0958665	0.508446	0.299607	0.648793	1.27439	2.64125	3.38057	2.6558	AT2G04125	0.229888	0	0.117897	0	0	0	0	0	0
OS06G0582600	0.197187	0.0533581	0	0.181564	1.33144	3.17069	3.84464	4.27102	AT1G76020	1.78136	2.27831	2.44222	1.13109	1.35936	1.3574	1.73895	2.19282	2.1321
OS02G0690600	1.67618	1.49794	2.10295	0.0207763	0.0380892	0	0.0336796	0.120674	AT5G18300	1.51446	1.54041	1.67765	1.17281	2.05152	3.26963	2.20423	3.34186	3.47215
EPlOSAG00000003042	1.35293	0.341692	1.05706	3.92409	0.799336	1.36372	0.353399	0	AT4G38010	0.168917	0.145379	0.0799652	0.440228	0.288299	0.298707	0.89983	1.33732	1.21868
EPlOSAG00000003040	0	0.683385	0.264266	1.74404	2.79767	0.454574	1.0602	0.506492	AT5G15150	0.257962	0.122445	0.0705575	0.0208091	0.0401656	0.051567	0.0807425	0.184078	0.304671
EPlOSAG00000003049	0	0	0	0	0.399668	0	0	0	AT5G45260	1.43418	1.3631	1.33117	1.97435	1.53753	1.56508	3.02457	3.32578	2.89608
EPlOSAG00000042919	0.11859	0	0	0	0.175163	0	0.154885	0	AT3G61480	2.78265	3.19303	2.79537	4.18376	3.82208	3.9969	6.03154	6.23382	6.25758
EPlOSAG00000042918	0.240146	0.454878	1.17268	4.45002	3.54705	5.24465	1.72503	3.82085	AT5G63790	8.77329	6.48991	6.66637	5.85202	4.18132	5.08838	7.25022	7.72667	8.06407
OS08G0126500	0.1873	0.067577	0.156793	0.150903	0.0592822	0.0224755	0	0.150255	AT1G62820	1.56482	1.75311	1.83765	3.48505	2.99264	2.56142	3.32739	2.98766	3.89958
EPlOSAG00000042915	0	0	0	0	0	0.278231	0	0	AT1G56300	0.0865314	0.0880141	0.207095	0.0523519	0.0505246	0.072074	16.64	21.9917	22.8747
OS03G0190400	0	0	0	0.0129309	0	0.0539261	0	0.0300425	AT2G19330	0	0	0	0	0	0	0	0.0180196	0
OS03G0226300	0.0306243	0.0257813	0.0897269	0.0493465	0.2714	0.0857459	0.11999	0.305725	AT2G05830	5.99947	5.7396	5.5494	10.4108	9.16034	10.0407	13.9928	16.517	16.2039
OS03G0432900	52.3235	54.7677	53.787	43.5822	41.1551	43.8135	44.1476	55.1166	AT1G20990	0.0194623	0	0	0.0235495	0.136365	0.058358	0.0913757	0.144222	0.10141
OS08G0467400	13.3768	14.4713	11.6568	15.4107	15.8106	9.56725	10.6816	10.0182	AT1G73210	0.339036	0.273002	0.130405	0.888847	0.52789	0.550662	1.35965	1.38413	1.08939
OS08G0326900	0.842115	0.949258	0.808505	0.613307	0.857336	0.863218	0.814008	1.48724	AT5G22510	14.8615	14.8584	14.9035	14.5747	15.0674	16.3639	15.0645	16.8583	15.6804
EPlOSAG00000022454	0	0	0	0	0	0.370974	0	0	AT4G19700	1.20691	1.07414	0.99476	2.68604	3.22148	2.43417	1.18895	1.95198	2.24597
EPlOSAG00000022456	0	0	0.49376	0.81465	0	0	0	0	AT5G01800	7.60993	6.71073	6.0256	8.8144	7.89458	7.40744	10.5447	10.954	10.417
EPlOSAG00000022457	2.02228	1.27685	6.91264	5.70255	11.2012	5.09602	1.98089	6.62438	AT3G61520	0.703391	0.459165	0.570712	1.18139	1.15242	0.755511	1.65122	1.85847	2.19905
OS09G0460350	0.242966	0.525965	0.203392	0.111858	0.256336	0.874655	0.430655	0.32485	AT5G03700	2.3001	1.76926	1.71043	1.07847	2.08165	1.30754	0.38809	0.544478	0.644189
OS04G0388800	20.5028	22.8062	22.3934	24.0524	24.8415	22.0784	22.2986	23.1529	AT2G22330	3.74467	2.85663	2.68371	1.21991	0.574649	1.39156	0.507153	0.35576	0.387738
OS05G0457200	0.0792466	0.114367	0.0995086	1.58705	3.71218	2.14912	1.62643	2.18266	AT3G54100	1.16687	1.20681	1.14657	1.74414	1.21378	1.32311	2.17528	2.13952	2.26854
OS03G0178150	0.0824534	0	0	0	0.243574	0.969628	0.430752	0	AT2G37330	1.62101	0.885462	1.13924	1.48925	0.455718	1.41019	0.739929	1.85374	1.53288
OS09G0532000	130.139	122.817	147.594	12.0362	19.0138	15.9497	18.7273	16.5953	AT4G04370	1.43878	1.29411	1.6343	1.94237	1.1664	1.54503	4.03352	4.0043	4.2627
OS05G0430900	18.1108	23.1106	20.4686	17.3119	28.8767	12.7143	12.359	12.7795	AT1G80370	0.470584	0.314113	0.467593	1.65485	1.18494	1.58744	3.71111	3.62038	4.06117
OS01G0706100	1.15119	0.881754	0.884694	2.53918	1.60279	1.25231	1.05985	0.317926	AT3G10010	1.34698	1.27042	1.38788	3.72647	3.78944	3.0231	5.33957	6.27631	6.12532
OS03G0794700	71.9346	58.6507	52.1212	152.644	103.029	67.417	55.1117	25.6661	AT1G79740	2.063	2.25671	2.40547	2.79062	2.50003	3.05407	4.93429	4.73528	4.42148
OS03G0168800	0.107413	0.0775085	0.0749317	0.0494516	0.181319	0.0773357	0.060123	0.0574456	AT4G15248	2.80699	2.34373	0.902411	4.46106	3.27793	3.55935	0.344225	0.241468	0.52392
OS03G0237250	14.0878	13.3179	11.9754	4.33322	5.75374	2.37971	2.93407	2.25792	AT4G15240	1.28923	1.51702	1.32236	1.86586	1.38745	1.76866	1.95831	2.10221	2.17336
OS10G0343200	16.6489	16.4795	15.3014	22.4634	23.1951	19.8473	19.2042	20.0048	AT1G04877	0	0	0	0	0.104005	0	0	0	0
OS12G0106600	2.27743	2.47017	2.09502	5.08585	5.7367	5.31827	6.82514	7.2877	AT1G04870	3.25872	2.86028	3.05402	10.5082	12.1311	8.58092	6.85382	7.35478	7.87797
OS11G0689000	2.58835	3.47154	3.12453	3.65263	3.94183	2.24168	3.23353	3.18984	AT1G80080	1.86559	2.25615	1.79299	15.4462	15.7991	16.6059	22.3803	20.5979	19.1508
EPlOSAG00000002313	0.404456	0	0	0	0	0	0	0	AT5G26670	0.645627	0.958768	0.913861	2.3749	2.24676	2.41346	3.87998	3.73176	4.25223
OS01G0913900	0.0231187	0.189761	0	0.260766	0.426841	0.0776769	0.0754853	0.108186	AT1G04873	0	0	0	0	0	0	0.131543	0	0.116791
OS09G0465800	5.06652	3.92969	3.06435	5.92611	3.79872	5.53035	4.66893	1.92562	AT4G05420	8.5755	8.08034	7.82096	15.4059	14.2883	13.3638	15.8268	17.7776	15.9293
EPlOSAG00000007420	0	0	0.852859	2.81424	3.00962	3.91209	3.80172	4.90376	AT4G02430	2.40706	2.18033	2.21097	2.78216	2.1816	2.45376	3.68273	4.20045	4.26811
OS04G0408600	10.4846	12.9847	12.1732	57.4863	50.6956	67.3324	81.8964	82.1316	AT4G05425	0	0.10058	0.101426	0.358957	0.230952	0.988367	0.116067	0.244258	0.206101
OS03G0619151	0.486371	0.697933	0.496601	0.498727	0.489812	0.408541	0.519728	0	AT1G10580	2.31806	2.60728	2.86825	5.03097	5.42827	4.08219	6.59334	6.75591	7.43881
OS03G0588800	0	0	0.0150223	0	0	0	0	0	AT3G55270	4.08179	3.82833	4.45991	5.71885	6.21165	6.02089	8.5028	9.19097	8.46265
OS06G0149133	2.59564	4.0475	2.70785	7.47777	7.75487	4.16235	4.31458	3.20225	AT3G63010	0.725516	0.818451	0.541206	1.50038	1.37099	1.72719	0.789645	0.727703	0.494885
OS08G0296600	25.1478	25.0779	22.0916	11.46	11.0418	8.72239	9.09579	9.28264	AT1G10585	0.317295	0.347557	0.175241	1.83105	1.11159	0.292743	0.0286482	0	0
OS10G0102200	0.0578664	0	0	0.155405	0.0569808	0	0	0	AT2G28070	2.27834	2.73682	2.56952	5.8255	5.42954	5.23452	7.38133	8.81938	8.85262
OS07G0554400	0.0229804	0.0290193	0.0224436	0.148118	0	0.193031	0.150068	0	AT1G10586	0	0	0	0.0402292	0	0	0	0	0
OS09G0396900	9.49281	2.10168	2.36794	0.827719	1.42641	0.0345185	1.28811	0.0384609	AT4G28430	0.112003	0.0162747	0.0820583	0.387215	0.33633	0.703675	1.69026	2.42408	1.68412
OS02G0825700	1.6129	2.22957	1.2956	2.1376	1.98762	1.31472	1.15921	0.678845	AT5G47940	1.02454	0.915784	1.04026	1.47763	1.36563	1.64467	2.96389	3.35727	3.00896
OS04G0477500	9.35424	9.69444	9.38145	12.6284	13.6027	14.9335	13.7405	13.4996	AT4G12900	0.378163	0.576964	0.436366	0.257389	0.441609	0.448847	5.46516	7.95935	8.30054
OS07G0159200	15.4234	13.8141	11.4389	13.2049	8.56431	8.1174	7.82526	7.74209	AT1G77770	2.94376	2.90509	2.73184	4.09204	3.3558	4.53606	4.62757	5.03516	4.4738
EPlOSAG00000037572	0	0.155514	0.360825	0	0	0.20689	0	0	AT1G77950	0	0.0388053	0.019566	0	0	0	0	0	0
EPlOSAG00000037574	0	0	0	0	0	0	0.159817	0	AT5G63700	4.18753	3.97845	4.03554	4.87208	4.9707	5.25483	4.96915	4.95397	4.74755
EPlOSAG00000037577	0	0	0	0	0	0	0.473421	0	AT5G07930	0	0.021747	0	0	0	0	0	0	0
OS04G0103200	28.857	19.2113	18.3217	39.5649	31.0956	23.6226	20.3563	10.5917	AT2G47640	2.62338	2.43375	1.86286	7.53464	5.25174	5.61876	6.5983	6.43256	8.95269
OS09G0506900	6.50372	8.46134	7.02877	9.48695	10.6048	9.24395	10.5954	11.5972	AT3G63390	3.64946	2.83515	2.85901	4.7636	5.03357	4.36571	5.53155	5.39455	6.0192
OS08G0117200	60.5751	51.9279	48.4216	105.98	70.2569	53.5206	41.6085	18.6967	AT2G45640	6.16386	6.44046	5.77624	12.9504	13.12	11.7336	12.4308	12.7571	15.9711
OS05G0342000	0.624566	0.283929	1.07356	0.966138	0.664207	0.419698	0.195771	0.280579	AT5G02760	26.6702	27.801	26.1934	9.21735	26.0965	30.3333	10.6803	12.5298	13.3155
OS10G0571900	0	0	0	0	0.0240071	0	0	0	AT4G36390	20.0463	17.115	17.3314	28.0525	25.7835	26.5195	24.5363	27.061	25.948
OS05G0506200	17.3757	20.6722	20.2891	21.1308	25.3903	23.2606	25.9049	33.7108	AT3G43240	2.08651	2.04812	2.13078	4.3438	3.6921	4.04347	6.10659	7.11945	7.12137
OS02G0580966	1.56781	1.93411	1.61363	0.505257	0.427517	0.324166	0.724546	0.293466	AT5G13210	0.0910523	0.101874	0.168106	0.870376	0.404049	0.12741	0.170997	0.164933	0.132842
OS11G0576975	0.945389	0.767457	1.28603	2.28503	1.34651	1.36133	0.705556	0.252801	AT2G27210	3.64332	3.78675	3.34214	4.8501	4.56456	4.84873	6.06792	6.66076	6.54234
OS03G0145800	19.3315	16.4795	18.5444	29.5788	22.7814	14.3384	13.5476	9.57363	AT4G35800	8.9943	8.59689	9.67566	16.5643	14.7147	14.5429	20.7404	21.0334	19.1499
OS02G0467000	0.340406	0.805985	1.89083	0.754205	0.518506	0.125096	0.0416799	0	AT4G29740	0.87026	1.0268	0.476066	0.828379	0.826565	0.800245	2.7784	2.22607	1.64454
OS10G0442400	18.791	15.9879	8.78471	1.27507	2.44114	0.992811	1.19046	1.2187	AT5G39370	0	0	0	0	0	0	0	0.0563513	0
EPlOSAG00000020077	0	0	0	0	0.0380892	0	0	0	AT5G59460	3.21198	3.57951	2.69291	5.30596	5.61	5.77872	5.11419	6.0252	7.24756
OS01G0266000	8.27905	8.296	7.71466	14.5287	10.2977	9.31923	8.51456	5.53165	AT3G26200	0.0148766	0.0151315	0.0305177	0.846038	0.990232	0.535293	7.71796	7.49634	8.17017
OS11G0433200	89.7322	84.5246	80.9481	57.0435	57.8079	42.6368	42.0013	42.4794	AT1G70740	1.84546	1.37279	1.76574	2.08304	2.33199	2.51905	3.31383	3.66266	3.47322
OS04G0391000	0.402721	0.462318	0.420131	0.589932	0.567799	0.476664	0.573789	0.205589	AT3G04660	0.0216386	0	0	0.026183	0	0.021628	0.0253985	0.0178166	0.0676502
OS10G0340800	7.50529	7.95757	5.62426	24.9479	29.0039	19.1904	15.9056	21.2496	AT5G45910	0	0	0	0	0	0	0	0.0173423	0
OS11G0592550	0.0230448	0.0388007	0.0450129	0	0.0226921	0.0258095	0	0.0575145	AT1G69280	0.217827	0.057798	0.145711	0.217734	0.188014	0.208253	0.266791	0.343108	0.296089
OS06G0347966	21.2802	19.8848	15.0002	21.1239	25.0155	12.2062	10.2324	6.82435	AT5G56590	3.30796	2.6837	2.98904	5.30512	4.89	6.32401	4.49904	5.36088	5.28037
OS05G0464150	0	0	0	0	0	0.0264982	0	0	AT5G06735	0	0.115923	0	0	0	0	0	0	0
OS01G0928400	0.0489781	0.0309244	0.071751	1.22327	1.62771	0.308554	0.607693	1.03138	AT1G24147	1.18196	1.26086	0.709659	0.209296	0.639635	0.749168	0.0338374	0.0712092	0.0600852
OS06G0508950	0.100061	0.189532	0	0.483698	0.96066	0	0.261368	0.56189	AT4G00280	0	0.506624	0.383167	0	0.145414	0.248922	0.584635	0.205056	0.129767
OS03G0147400	150.426	178.787	148.867	154.321	207.101	162.709	157.919	168.346	AT1G24145	0.445659	0.23998	0.134444	0.222045	0.214295	0.157214	0.0615406	0.0647546	0.0546388
OS07G0129300	0.248329	0.65568	0.264577	0.400145	0.266758	0.568885	0.176907	0.0845145	AT1G29310	3.63398	4.4245	3.75507	7.11064	6.29451	6.17067	8.70522	9.81056	9.15084
OS02G0784801	0	0	0.2189	0.412756	0.0945881	0	0	0	AT5G06730	0.0189015	0.0192254	0	0	0.0220727	0	0.0221857	0.0155629	0.0393953
OS03G0791700	2.34923	1.52916	2.57228	41.9618	45.7439	25.9175	19.1289	15.2434	AT1G24140	0	0.0767613	0.0154815	0.127844	0.0352519	0.150862	0	0.0372829	0.0471881
OS01G0343500	9.74957	8.27087	8.52082	10.715	10.6896	7.76946	7.37884	7.69756	AT1G20550	0.484005	0.433691	0.496442	0.948197	0.807441	0.932978	1.35263	1.3948	1.12888
OS10G0554050	0.0189371	0	0.0184947	0.122057	0.0559417	0	0	0	AT5G44063	2.59751	2.5568	2.06265	1.82498	1.17419	1.50749	2.06535	1.24184	1.04784
OS03G0781100	1.85238	1.85554	2.08392	0.994946	1.05055	1.08983	0.796226	0.687617	AT1G11180	2.91015	2.93759	2.84925	2.98778	2.5488	3.52572	6.88336	7.47883	7.60479
OS01G0586800	0.461949	1.16668	1.53925	0	0	0	0	0	AT5G44060	3.15944	3.40386	3.21931	2.91752	3.51961	4.5083	4.70871	5.16855	4.09399
OS03G0370600	2.6136	1.97167	1.9227	2.07836	0.651755	1.31152	1.06394	0.254141	AT4G20190	0	0.0201604	0	0	0	0	0.0232648	0	0
OS06G0638900	16.785	16.9726	16.614	12.4394	12.554	13.7717	13.3339	13.6972	AT4G39830	0.14765	0.12515	0.100962	0.0446644	0.0862108	0.122981	0.158862	0.162094	0.0897567
OS05G0376400	0	0	0.0546492	0.030055	0.13775	0	0	0	AT5G44065	0.185495	0.283011	0	0	0.108308	0.185404	0.544316	0.0763657	0.193308
OS12G0511400	9.42622	10.5774	9.62625	10.762	12.0689	9.33031	9.5478	8.98469	AT1G11185	0	0	0	0	0	0.102219	0	0	0
OS03G0300900	53.9331	66.7274	51.9039	65.2476	77.4323	54.0092	50.1207	48.7001	AT3G45570	0	0	0	0	0	0	0	0.0235847	0.0298506
OS07G0213350	0	0	0	0.0254892	0.0233647	0.0265745	0.0206598	0	AT4G39838	0.388495	0.368809	0.438326	0.470084	0.604901	0.63423	0.531998	0.533126	0.728746
OS01G0851100	8.11428	6.69588	7.78535	8.45214	8.65417	23.8344	25.5294	30.9782	AT2G36250	10.0191	9.73479	9.50636	13.3301	13.7416	13.6322	21.8756	25.2373	27.7728
[truncated: 41,808 more rows]
