# Supplementary material for: Similarities and Differences of Photosynthesis Establishment Related mRNAs and Novel lncRNAs in Early Seedlings (Coleoptile/Cotyledon vs. True Leaf) of Rice and Arabidopsis
Source: Front Genet. 2020 Sep 8;11:565006. doi: 10.3389/fgene.2020.565006 (PMC7506105; doi:10.3389/fgene.2020.565006)
Supplement: TABLE S8 — The coherent target genes of differentially expressed lncRNAs in all comparisons. [file Table_8.XLSX]

## Sheet: Sheet1
TABLE S8 The coherent target genes of differentially expressed lncRNAs in all comparisons.
lncRNA	Comparison	Up/Down	Significant	Biotype	Position
MSTRG.10051	icl-vs-cpt	up	no	linc	chr10:11256619-11260130:+
MSTRG.10138	icl-vs-cpt	down	yes	linc	chr10:11815743-11817824:-
MSTRG.10195	icl-vs-cpt	down	yes	linc	chr10:12122137-12125225:-
MSTRG.1027	icl-vs-cpt	up	no	linc	chr1:4205119-4208179:-
MSTRG.10361	icl-vs-cpt	down	yes	linc	chr10:12897809-12898264:-
MSTRG.10381	icl-vs-cpt	down	yes	antisense	chr10:12982625-12983816:-
MSTRG.10486	icl-vs-cpt	down	yes	linc	chr10:13877878-13878562:+
MSTRG.10499	icl-vs-cpt	up	no	linc	chr10:13929815-13931547:-
MSTRG.10542	icl-vs-cpt	up	no	antisense	chr10:14324090-14327099:+
MSTRG.106	icl-vs-cpt	down	no	antisense	chr1:305436-306513:-
MSTRG.10853	icl-vs-cpt	up	no	antisense	chr10:16152927-16156032:+
MSTRG.1093	icl-vs-cpt	up	no	linc	chr1:4459229-4459789:+
MSTRG.10933	icl-vs-cpt	up	no	linc	chr10:16813794-16814541:+
MSTRG.11008	icl-vs-cpt	down	yes	linc	chr10:17177954-17179397:-
MSTRG.11165	icl-vs-cpt	up	no	antisense	chr10:17963994-17964275:+
MSTRG.1117	icl-vs-cpt	up	no	antisense	chr1:4622163-4622743:+
MSTRG.11320	icl-vs-cpt	up	no	antisense	chr10:18586091-18588440:+
MSTRG.11390	icl-vs-cpt	down	no	linc	chr10:18886002-18886304:-
MSTRG.11497	icl-vs-cpt	down	yes	antisense	chr10:19202190-19204485:+
MSTRG.11657	icl-vs-cpt	down	no	linc	chr10:19922251-19924019:+
MSTRG.11886	icl-vs-cpt	up	yes	linc	chr10:21375867-21377402:-
MSTRG.11926	icl-vs-cpt	down	no	linc	chr10:21553194-21553576:-
MSTRG.1211	icl-vs-cpt	up	no	linc	chr1:5028302-5030051:-
MSTRG.12138	icl-vs-cpt	down	yes	linc	chr10:21263733-21268290:+
MSTRG.12184	icl-vs-cpt	down	yes	antisense	chr10:22054758-22055476:-
MSTRG.12366	icl-vs-cpt	down	no	linc	chr10:22673214-22673911:-
MSTRG.12378	icl-vs-cpt	up	no	linc	chr10:22737017-22738775:+
MSTRG.1240	icl-vs-cpt	up	no	linc	chr1:5209708-5211006:-
MSTRG.12550	icl-vs-cpt	down	no	linc	chr11:216225-219281:-
MSTRG.12567	icl-vs-cpt	up	no	antisense	chr11:263802-265633:+
MSTRG.12667	icl-vs-cpt	up	no	linc	chr11:673480-675622:+
MSTRG.12740	icl-vs-cpt	down	no	antisense	chr11:890510-891056:+
MSTRG.12851	icl-vs-cpt	down	no	antisense	chr11:1453615-1454411:-
MSTRG.13199	icl-vs-cpt	up	no	antisense	chr11:3023712-3024371:-
MSTRG.13212	icl-vs-cpt	up	no	linc	chr11:3115850-3116398:-
MSTRG.13268	icl-vs-cpt	up	no	linc	chr11:3472734-3473664:-
MSTRG.13487	icl-vs-cpt	up	yes	antisense	chr11:4564032-4565332:+
MSTRG.13533	icl-vs-cpt	down	no	linc	chr11:5103345-5103927:-
MSTRG.13535	icl-vs-cpt	down	no	antisense	chr11:5097010-5098975:-
MSTRG.13712	icl-vs-cpt	down	no	linc	chr11:6151932-6152307:+
MSTRG.13762	icl-vs-cpt	down	no	antisense	chr11:6646269-6646597:-
MSTRG.13899	icl-vs-cpt	down	no	antisense	chr11:7696162-7697105:+
MSTRG.13967	icl-vs-cpt	up	no	linc	chr11:8007743-8008091:+
MSTRG.13993	icl-vs-cpt	up	no	linc	chr11:8186755-8187505:-
MSTRG.14008	icl-vs-cpt	down	yes	linc	chr11:8277041-8278396:-
MSTRG.14022	icl-vs-cpt	down	no	linc	chr11:8301780-8303791:-
MSTRG.14108	icl-vs-cpt	up	no	linc	chr11:9262572-9264336:+
MSTRG.14147	icl-vs-cpt	up	no	linc	chr11:9667409-9667821:+
MSTRG.14194	icl-vs-cpt	up	yes	linc	chr11:10001250-10002637:+
MSTRG.14261	icl-vs-cpt	down	no	antisense	chr11:10769689-10771300:+
MSTRG.14369	icl-vs-cpt	up	no	linc	chr11:12285488-12286732:-
MSTRG.14415	icl-vs-cpt	up	no	linc	chr11:12725013-12725599:-
MSTRG.14416	icl-vs-cpt	up	yes	linc	chr11:12703894-12706795:-
MSTRG.14482	icl-vs-cpt	up	no	linc	chr11:13683802-13686732:+
MSTRG.14483	icl-vs-cpt	up	no	antisense	chr11:13671619-13675410:-
MSTRG.14495	icl-vs-cpt	up	no	linc	chr11:13738214-13738513:-
MSTRG.14505	icl-vs-cpt	up	yes	antisense	chr11:13755034-13759696:-
MSTRG.14542	icl-vs-cpt	up	no	antisense	chr11:14127382-14129760:+
MSTRG.14552	icl-vs-cpt	up	no	linc	chr11:14185917-14187500:-
MSTRG.14930	icl-vs-cpt	up	no	antisense	chr11:16129803-16135844:+
MSTRG.15063	icl-vs-cpt	up	no	linc	chr11:17073770-17074066:-
MSTRG.15082	icl-vs-cpt	down	no	linc	chr11:17256809-17258423:+
MSTRG.15227	icl-vs-cpt	down	no	antisense	chr11:18857907-18860948:-
MSTRG.15266	icl-vs-cpt	down	no	antisense	chr11:19134182-19137430:+
MSTRG.15271	icl-vs-cpt	down	yes	antisense	chr11:19118666-19120533:+
MSTRG.15327	icl-vs-cpt	down	no	antisense	chr11:19523532-19525203:-
MSTRG.1535	icl-vs-cpt	down	no	antisense	chr1:6655876-6663176:-
MSTRG.1536	icl-vs-cpt	up	no	linc	chr1:6656307-6658283:+
MSTRG.15376	icl-vs-cpt	down	no	linc	chr11:19911104-19916976:+
MSTRG.15394	icl-vs-cpt	up	yes	linc	chr11:20000036-20001328:-
MSTRG.15548	icl-vs-cpt	up	no	antisense	chr11:20702041-20702639:-
MSTRG.15577	icl-vs-cpt	up	no	antisense	chr11:20837941-20839023:-
MSTRG.15624	icl-vs-cpt	down	no	linc	chr11:21304492-21307994:-
MSTRG.15668	icl-vs-cpt	up	no	linc	chr11:21728288-21728804:-
MSTRG.15746	icl-vs-cpt	up	no	antisense	chr11:22223157-22224338:-
MSTRG.15892	icl-vs-cpt	down	no	antisense	chr11:23063698-23064345:-
MSTRG.15983	icl-vs-cpt	down	no	linc	chr11:23614402-23614998:-
MSTRG.16098	icl-vs-cpt	up	yes	linc	chr11:24338967-24341935:+
MSTRG.16135	icl-vs-cpt	up	no	linc	chr11:24723137-24723995:+
MSTRG.16162	icl-vs-cpt	down	no	linc	chr11:24960713-24961944:+
MSTRG.16293	icl-vs-cpt	up	yes	linc	chr11:25966454-25968186:-
MSTRG.16418	icl-vs-cpt	down	yes	linc	chr11:27031070-27031707:+
MSTRG.1645	icl-vs-cpt	up	no	antisense	chr1:7092102-7092793:-
MSTRG.16476	icl-vs-cpt	up	no	linc	chr11:27233040-27234137:+
MSTRG.16543	icl-vs-cpt	down	no	linc	chr11:27743701-27745337:-
MSTRG.16552	icl-vs-cpt	down	no	linc	chr11:27820985-27822028:+
MSTRG.16566	icl-vs-cpt	up	no	linc	chr11:27878653-27879650:-
MSTRG.16582	icl-vs-cpt	down	no	linc	chr11:28053777-28055853:-
MSTRG.16637	icl-vs-cpt	down	yes	linc	chr11:28696432-28697510:-
MSTRG.16645	icl-vs-cpt	up	no	linc	chr11:28700723-28703035:+
MSTRG.16650	icl-vs-cpt	down	no	linc	chr11:28715333-28716143:+
MSTRG.16956	icl-vs-cpt	up	no	antisense	chr12:818979-823960:+
MSTRG.17059	icl-vs-cpt	down	no	antisense	chr12:1174924-1176870:+
MSTRG.17087	icl-vs-cpt	up	no	antisense	chr12:1256119-1257510:-
MSTRG.17250	icl-vs-cpt	down	no	antisense	chr12:2087101-2088849:+
MSTRG.17358	icl-vs-cpt	up	no	linc	chr12:2682795-2683298:-
MSTRG.17411	icl-vs-cpt	down	no	antisense	chr12:2969661-2974674:-
MSTRG.1745	icl-vs-cpt	up	no	linc	chr1:7485923-7486903:-
MSTRG.17657	icl-vs-cpt	down	no	antisense	chr12:4080140-4080476:+
MSTRG.17746	icl-vs-cpt	up	no	linc	chr12:4996561-4996973:-
MSTRG.17883	icl-vs-cpt	down	no	linc	chr12:5819615-5821211:+
MSTRG.1790	icl-vs-cpt	down	no	linc	chr1:7705963-7707611:-
MSTRG.17904	icl-vs-cpt	down	no	linc	chr12:5903538-5903838:-
MSTRG.17911	icl-vs-cpt	down	no	antisense	chr12:6119199-6121577:-
MSTRG.17946	icl-vs-cpt	up	yes	linc	chr12:6423462-6424265:-
MSTRG.18083	icl-vs-cpt	up	no	linc	chr12:7315737-7316546:-
MSTRG.18540	icl-vs-cpt	down	no	linc	chr12:11085079-11085523:-
MSTRG.18582	icl-vs-cpt	up	yes	antisense	chr12:11287091-11289658:-
MSTRG.18701	icl-vs-cpt	down	yes	linc	chr12:12400001-12403094:-
MSTRG.18715	icl-vs-cpt	up	no	linc	chr12:12555449-12555925:-
MSTRG.18717	icl-vs-cpt	up	no	antisense	chr12:12426006-12428189:-
MSTRG.18736	icl-vs-cpt	up	no	linc	chr12:12796447-12799693:-
MSTRG.18776	icl-vs-cpt	down	no	linc	chr12:13413635-13419221:-
MSTRG.18777	icl-vs-cpt	down	no	linc	chr12:13413784-13419322:+
MSTRG.18799	icl-vs-cpt	up	no	antisense	chr12:13386371-13388433:-
MSTRG.18807	icl-vs-cpt	up	no	linc	chr12:13404628-13404972:+
MSTRG.18820	icl-vs-cpt	up	no	linc	chr12:13568937-13569571:-
MSTRG.18857	icl-vs-cpt	up	yes	linc	chr12:13994790-13995296:-
MSTRG.18958	icl-vs-cpt	down	no	linc	chr12:15104078-15106514:+
MSTRG.18982	icl-vs-cpt	down	no	linc	chr12:15397416-15399050:+
MSTRG.18983	icl-vs-cpt	up	no	linc	chr12:15362610-15370509:-
MSTRG.1901	icl-vs-cpt	up	no	antisense	chr1:8301455-8301937:-
MSTRG.19052	icl-vs-cpt	down	no	linc	chr12:16811031-16812531:+
MSTRG.19071	icl-vs-cpt	down	no	linc	chr12:16939694-16946098:-
MSTRG.19088	icl-vs-cpt	up	no	linc	chr12:17353064-17358802:-
MSTRG.19304	icl-vs-cpt	up	no	linc	chr12:19502440-19502877:+
MSTRG.19308	icl-vs-cpt	up	no	antisense	chr12:19503533-19503916:+
MSTRG.19335	icl-vs-cpt	up	no	linc	chr12:19640627-19641992:+
MSTRG.19419	icl-vs-cpt	down	no	linc	chr12:20193029-20194856:-
MSTRG.19472	icl-vs-cpt	up	no	linc	chr12:20813532-20814008:-
MSTRG.19601	icl-vs-cpt	up	no	linc	chr12:21551031-21551348:-
MSTRG.19641	icl-vs-cpt	up	no	linc	chr12:21667804-21669456:+
MSTRG.19649	icl-vs-cpt	up	no	linc	chr12:21973074-21973536:+
MSTRG.19693	icl-vs-cpt	down	no	linc	chr12:22423826-22424288:-
MSTRG.19820	icl-vs-cpt	down	no	linc	chr12:23176829-23178814:-
MSTRG.20095	icl-vs-cpt	up	no	linc	chr12:24569382-24569968:+
MSTRG.20104	icl-vs-cpt	down	yes	linc	chr12:24624643-24625926:-
MSTRG.2028	icl-vs-cpt	up	no	antisense	chr1:8740664-8742126:+
MSTRG.20417	icl-vs-cpt	down	no	linc	chr12:26292497-26297039:-
MSTRG.20635	icl-vs-cpt	down	no	antisense	chr12:27396230-27396806:-
MSTRG.21050	icl-vs-cpt	down	yes	linc	chr2:1369800-1373837:+
MSTRG.21177	icl-vs-cpt	down	yes	antisense	chr2:1929849-1931172:+
MSTRG.21226	icl-vs-cpt	down	no	antisense	chr2:2100854-2101343:-
MSTRG.21259	icl-vs-cpt	down	no	linc	chr2:2255728-2256144:+
MSTRG.21349	icl-vs-cpt	down	no	linc	chr2:2377777-2378289:+
MSTRG.214	icl-vs-cpt	up	no	antisense	chr1:700645-702366:+
MSTRG.21429	icl-vs-cpt	up	no	antisense	chr2:3071569-3072387:+
MSTRG.21642	icl-vs-cpt	up	yes	antisense	chr2:3995164-3996401:-
MSTRG.21646	icl-vs-cpt	up	no	antisense	chr2:4015735-4022352:+
MSTRG.21665	icl-vs-cpt	up	no	antisense	chr2:4093142-4094828:-
MSTRG.21777	icl-vs-cpt	down	yes	linc	chr2:4525063-4527095:-
MSTRG.21810	icl-vs-cpt	down	no	linc	chr2:4634700-4636997:+
MSTRG.21812	icl-vs-cpt	up	no	linc	chr2:4643267-4644453:+
MSTRG.21924	icl-vs-cpt	down	yes	antisense	chr2:5067309-5070786:+
MSTRG.22196	icl-vs-cpt	down	no	linc	chr2:6258938-6260510:+
MSTRG.22209	icl-vs-cpt	down	no	linc	chr2:6317942-6318806:-
MSTRG.22260	icl-vs-cpt	up	no	linc	chr2:6538915-6540203:-
MSTRG.22265	icl-vs-cpt	down	no	antisense	chr2:6532492-6533100:+
MSTRG.22443	icl-vs-cpt	down	no	linc	chr2:7514080-7514515:-
MSTRG.22460	icl-vs-cpt	down	no	linc	chr2:7615521-7616379:-
MSTRG.22461	icl-vs-cpt	up	no	linc	chr2:7616688-7617310:-
MSTRG.22513	icl-vs-cpt	down	no	antisense	chr2:7937683-7938676:-
MSTRG.22533	icl-vs-cpt	up	no	linc	chr2:8002090-8002430:+
MSTRG.22680	icl-vs-cpt	down	no	antisense	chr2:8920652-8921315:-
MSTRG.22697	icl-vs-cpt	down	no	linc	chr2:9011319-9014207:+
MSTRG.22762	icl-vs-cpt	down	no	antisense	chr2:9516982-9517436:+
MSTRG.22795	icl-vs-cpt	down	no	antisense	chr2:9923114-9924932:+
MSTRG.22898	icl-vs-cpt	up	no	linc	chr2:10534345-10535176:-
MSTRG.22908	icl-vs-cpt	up	yes	linc	chr2:10621939-10627714:+
MSTRG.23017	icl-vs-cpt	down	yes	linc	chr2:11225351-11225812:-
MSTRG.23021	icl-vs-cpt	up	no	linc	chr2:11260177-11262728:-
MSTRG.23145	icl-vs-cpt	up	no	linc	chr2:12155915-12156428:+
MSTRG.23235	icl-vs-cpt	down	no	linc	chr2:12858419-12858791:+
MSTRG.23251	icl-vs-cpt	up	no	antisense	chr2:12901579-12905121:-
MSTRG.23263	icl-vs-cpt	up	no	antisense	chr2:13003172-13003731:+
MSTRG.23338	icl-vs-cpt	down	yes	linc	chr2:13669648-13675083:+
MSTRG.23373	icl-vs-cpt	down	yes	linc	chr2:13851929-13854854:-
MSTRG.23425	icl-vs-cpt	down	no	linc	chr2:14169396-14171796:+
MSTRG.23451	icl-vs-cpt	up	yes	linc	chr2:14685379-14686800:+
MSTRG.23463	icl-vs-cpt	down	no	linc	chr2:14965992-14967507:-
MSTRG.23464	icl-vs-cpt	down	no	linc	chr2:14966707-14969122:+
MSTRG.23861	icl-vs-cpt	up	no	linc	chr2:17673239-17673961:+
MSTRG.23866	icl-vs-cpt	down	no	linc	chr2:17759253-17764274:-
MSTRG.23883	icl-vs-cpt	down	no	linc	chr2:17859702-17860345:+
MSTRG.24040	icl-vs-cpt	down	no	linc	chr2:18798560-18799088:-
MSTRG.2424	icl-vs-cpt	up	no	linc	chr1:10940517-10942045:-
MSTRG.24311	icl-vs-cpt	down	no	linc	chr2:20581485-20582137:+
MSTRG.24337	icl-vs-cpt	up	no	linc	chr2:20688327-20690315:+
MSTRG.24438	icl-vs-cpt	up	no	linc	chr2:21135056-21135681:-
MSTRG.24596	icl-vs-cpt	down	no	linc	chr2:21992529-21993251:+
MSTRG.24678	icl-vs-cpt	down	no	antisense	chr2:22296150-22305329:-
MSTRG.24679	icl-vs-cpt	up	no	linc	chr2:22303638-22305274:+
MSTRG.24778	icl-vs-cpt	up	no	linc	chr2:22778846-22781955:-
MSTRG.25053	icl-vs-cpt	up	no	linc	chr2:24109788-24110424:-
MSTRG.251	icl-vs-cpt	up	no	linc	chr1:1007433-1009118:+
MSTRG.25112	icl-vs-cpt	up	yes	linc	chr2:24341581-24342271:-
MSTRG.25419	icl-vs-cpt	down	no	antisense	chr2:25739226-25739729:+
MSTRG.25550	icl-vs-cpt	up	no	linc	chr2:26316475-26316826:-
MSTRG.2557	icl-vs-cpt	down	no	linc	chr1:11799071-11799502:+
MSTRG.256	icl-vs-cpt	up	no	linc	chr1:1001177-1001530:+
MSTRG.25826	icl-vs-cpt	down	no	linc	chr2:27739005-27740174:-
MSTRG.26130	icl-vs-cpt	up	no	linc	chr2:29057920-29058360:+
MSTRG.26319	icl-vs-cpt	up	no	antisense	chr2:29829849-29830179:-
MSTRG.26625	icl-vs-cpt	down	no	linc	chr2:31035121-31035971:+
MSTRG.2681	icl-vs-cpt	up	no	linc	chr1:12627909-12628983:-
MSTRG.26900	icl-vs-cpt	up	yes	linc	chr2:32122192-32124114:-
MSTRG.26947	icl-vs-cpt	up	yes	antisense	chr2:32337267-32348847:-
MSTRG.27029	icl-vs-cpt	up	no	linc	chr2:32710747-32715886:+
MSTRG.27070	icl-vs-cpt	up	no	linc	chr2:32955753-32956422:+
MSTRG.27175	icl-vs-cpt	down	no	antisense	chr2:33287757-33288872:+
MSTRG.27294	icl-vs-cpt	up	no	antisense	chr2:33800075-33801141:-
MSTRG.27389	icl-vs-cpt	up	no	linc	chr2:34281969-34287115:+
MSTRG.27483	icl-vs-cpt	up	no	antisense	chr2:34493418-34494093:-
MSTRG.27733	icl-vs-cpt	down	no	linc	chr2:35436209-35437346:+
MSTRG.27795	icl-vs-cpt	up	yes	antisense	chr2:35626609-35627685:-
MSTRG.2781	icl-vs-cpt	up	no	linc	chr1:13414900-13415249:-
MSTRG.27979	icl-vs-cpt	up	yes	linc	chr3:379877-381189:+
MSTRG.27995	icl-vs-cpt	up	no	antisense	chr3:455549-457419:-
MSTRG.2803	icl-vs-cpt	down	no	linc	chr1:13521179-13521610:+
MSTRG.28205	icl-vs-cpt	down	no	antisense	chr3:1210019-1212352:-
MSTRG.28209	icl-vs-cpt	down	no	linc	chr3:1218900-1221193:+
MSTRG.28241	icl-vs-cpt	up	no	linc	chr3:1416086-1416541:+
MSTRG.28306	icl-vs-cpt	up	yes	antisense	chr3:1631519-1634115:+
MSTRG.28555	icl-vs-cpt	up	no	linc	chr3:2540640-2541082:-
MSTRG.28666	icl-vs-cpt	up	yes	linc	chr3:2996825-2997324:-
MSTRG.28683	icl-vs-cpt	down	no	linc	chr3:3065483-3066336:-
MSTRG.2886	icl-vs-cpt	up	no	linc	chr1:14083599-14086159:-
MSTRG.29311	icl-vs-cpt	up	no	linc	chr3:5386144-5386489:+
MSTRG.29363	icl-vs-cpt	up	no	linc	chr3:5600200-5603510:-
MSTRG.29375	icl-vs-cpt	up	no	linc	chr3:5665094-5665995:-
MSTRG.29388	icl-vs-cpt	up	no	linc	chr3:5694579-5697217:+
MSTRG.29441	icl-vs-cpt	down	no	linc	chr3:5888156-5889663:+
MSTRG.29496	icl-vs-cpt	up	no	linc	chr3:6100720-6101998:+
MSTRG.29555	icl-vs-cpt	up	no	antisense	chr3:6327575-6328003:-
MSTRG.29557	icl-vs-cpt	up	no	antisense	chr3:6343294-6344992:-
MSTRG.2972	icl-vs-cpt	down	no	antisense	chr1:14587709-14588913:+
MSTRG.29790	icl-vs-cpt	up	no	linc	chr3:7495910-7497287:-
MSTRG.29980	icl-vs-cpt	up	no	antisense	chr3:8250332-8253408:-
MSTRG.30211	icl-vs-cpt	down	no	linc	chr3:9228502-9229294:-
MSTRG.30391	icl-vs-cpt	up	no	antisense	chr3:9896517-9897628:-
MSTRG.30414	icl-vs-cpt	down	no	linc	chr3:9964764-9965887:-
MSTRG.30655	icl-vs-cpt	down	no	linc	chr3:10945501-10946892:+
MSTRG.3095	icl-vs-cpt	up	no	linc	chr1:15415035-15416129:-
MSTRG.30964	icl-vs-cpt	up	no	linc	chr3:12365795-12367529:-
MSTRG.31281	icl-vs-cpt	down	no	linc	chr3:13989521-13989971:-
MSTRG.3167	icl-vs-cpt	down	no	linc	chr1:16202442-16205854:+
MSTRG.31676	icl-vs-cpt	up	yes	linc	chr3:16272593-16273713:+
MSTRG.31678	icl-vs-cpt	up	yes	linc	chr3:16273722-16274604:+
MSTRG.32249	icl-vs-cpt	down	no	linc	chr3:20522110-20524586:+
MSTRG.32340	icl-vs-cpt	up	no	linc	chr3:21055785-21056704:+
MSTRG.32503	icl-vs-cpt	down	no	antisense	chr3:22213746-22214531:-
MSTRG.3253	icl-vs-cpt	up	no	antisense	chr1:16886169-16890306:-
MSTRG.32555	icl-vs-cpt	up	no	antisense	chr3:22541306-22542331:-
MSTRG.32674	icl-vs-cpt	up	no	linc	chr3:23392191-23398242:+
MSTRG.32816	icl-vs-cpt	up	no	linc	chr3:24457557-24457906:-
MSTRG.3282	icl-vs-cpt	down	no	antisense	chr1:17195300-17207786:+
MSTRG.32908	icl-vs-cpt	down	no	antisense	chr3:24902413-24902981:-
MSTRG.3291	icl-vs-cpt	down	no	antisense	chr1:17225537-17227358:-
MSTRG.32969	icl-vs-cpt	up	no	linc	chr3:25249481-25249976:-
MSTRG.33115	icl-vs-cpt	up	no	linc	chr3:26185231-26186020:-
MSTRG.33279	icl-vs-cpt	up	yes	linc	chr3:27237128-27237509:+
MSTRG.3341	icl-vs-cpt	up	no	linc	chr1:17428353-17429376:+
MSTRG.33431	icl-vs-cpt	down	no	linc	chr3:28003948-28004309:-
MSTRG.33724	icl-vs-cpt	up	no	linc	chr3:29248894-29250428:-
MSTRG.3393	icl-vs-cpt	up	yes	antisense	chr1:17785832-17794495:-
MSTRG.34096	icl-vs-cpt	up	no	linc	chr3:30993901-30994292:+
MSTRG.3426	icl-vs-cpt	up	no	linc	chr1:18033783-18035270:-
MSTRG.34467	icl-vs-cpt	up	no	linc	chr3:32336926-32337457:+
MSTRG.34627	icl-vs-cpt	down	no	antisense	chr3:32909883-32910273:-
MSTRG.3476	icl-vs-cpt	up	no	linc	chr1:18419417-18420040:-
MSTRG.35003	icl-vs-cpt	up	no	linc	chr3:34218110-34219594:-
MSTRG.35043	icl-vs-cpt	down	no	antisense	chr3:34354555-34355089:-
MSTRG.3531	icl-vs-cpt	down	no	linc	chr1:18623940-18624952:+
MSTRG.35325	icl-vs-cpt	up	no	linc	chr3:35400828-35401439:+
MSTRG.35326	icl-vs-cpt	up	no	linc	chr3:35401911-35402711:+
MSTRG.35433	icl-vs-cpt	down	no	linc	chr3:35804991-35805589:+
MSTRG.35618	icl-vs-cpt	down	no	linc	chr4:129092-129798:+
MSTRG.35661	icl-vs-cpt	up	no	linc	chr4:382979-383423:-
MSTRG.35833	icl-vs-cpt	up	yes	linc	chr4:1434652-1436855:+
MSTRG.35886	icl-vs-cpt	up	no	antisense	chr4:1997419-1998043:+
MSTRG.35893	icl-vs-cpt	up	no	linc	chr4:2074598-2082126:-
MSTRG.35911	icl-vs-cpt	up	no	linc	chr4:2337803-2338677:-
MSTRG.36108	icl-vs-cpt	down	no	linc	chr4:4550668-4553025:-
MSTRG.36125	icl-vs-cpt	down	no	linc	chr4:4773298-4774782:+
MSTRG.36140	icl-vs-cpt	down	no	linc	chr4:4912227-4912738:+
MSTRG.36151	icl-vs-cpt	down	no	linc	chr4:5129352-5130896:-
MSTRG.36242	icl-vs-cpt	up	no	antisense	chr4:5916062-5916783:+
MSTRG.36244	icl-vs-cpt	up	no	linc	chr4:5923846-5924761:-
MSTRG.36262	icl-vs-cpt	up	no	linc	chr4:6265978-6268801:-
MSTRG.36302	icl-vs-cpt	down	no	linc	chr4:6569387-6570599:-
MSTRG.36347	icl-vs-cpt	up	no	antisense	chr4:6925115-6926848:+
MSTRG.36348	icl-vs-cpt	up	no	linc	chr4:6961793-6965607:+
MSTRG.36541	icl-vs-cpt	up	yes	antisense	chr4:8477696-8480989:+
MSTRG.36574	icl-vs-cpt	up	no	linc	chr4:8685012-8690295:-
MSTRG.36610	icl-vs-cpt	up	no	linc	chr4:9549414-9553620:-
MSTRG.36665	icl-vs-cpt	up	yes	antisense	chr4:10069907-10075383:-
MSTRG.36730	icl-vs-cpt	up	no	linc	chr4:11090797-11092371:-
MSTRG.36731	icl-vs-cpt	up	no	linc	chr4:11091866-11093991:+
MSTRG.36755	icl-vs-cpt	down	no	linc	chr4:11348488-11352042:+
MSTRG.3683	icl-vs-cpt	up	no	linc	chr1:19854331-19854785:-
MSTRG.36870	icl-vs-cpt	up	no	linc	chr4:11850435-11857549:+
MSTRG.36983	icl-vs-cpt	down	no	linc	chr4:13019847-13021335:-
MSTRG.37001	icl-vs-cpt	down	yes	linc	chr4:13175749-13176733:+
MSTRG.37016	icl-vs-cpt	down	no	linc	chr4:13346404-13353290:-
MSTRG.37105	icl-vs-cpt	down	no	linc	chr4:14043582-14045812:+
MSTRG.37170	icl-vs-cpt	up	no	linc	chr4:15488620-15492303:+
MSTRG.37171	icl-vs-cpt	up	no	antisense	chr4:15470639-15487685:+
MSTRG.37177	icl-vs-cpt	down	no	antisense	chr4:15515981-15519089:+
MSTRG.37423	icl-vs-cpt	down	no	linc	chr4:17440412-17442974:-
MSTRG.37440	icl-vs-cpt	up	no	linc	chr4:17535077-17536390:-
MSTRG.37486	icl-vs-cpt	down	no	linc	chr4:18053347-18053772:-
MSTRG.37492	icl-vs-cpt	up	no	linc	chr4:18138667-18139982:+
MSTRG.37669	icl-vs-cpt	down	no	linc	chr4:19200341-19206674:+
MSTRG.37749	icl-vs-cpt	up	no	linc	chr4:19610788-19611590:-
MSTRG.37951	icl-vs-cpt	up	no	linc	chr4:20503742-20504923:+
MSTRG.37956	icl-vs-cpt	up	no	linc	chr4:20509741-20511885:-
MSTRG.3801	icl-vs-cpt	up	no	antisense	chr1:20715040-20715502:-
MSTRG.38030	icl-vs-cpt	down	no	linc	chr4:20838361-20839289:-
MSTRG.38071	icl-vs-cpt	up	no	linc	chr4:21020870-21022361:+
MSTRG.3818	icl-vs-cpt	up	no	linc	chr1:20786066-20791766:-
MSTRG.38209	icl-vs-cpt	up	no	linc	chr4:21715724-21716223:+
MSTRG.38325	icl-vs-cpt	up	yes	linc	chr4:22262901-22263968:+
MSTRG.3835	icl-vs-cpt	up	no	linc	chr1:20898948-20900423:+
MSTRG.38670	icl-vs-cpt	up	no	linc	chr4:23593026-23593432:+
MSTRG.38728	icl-vs-cpt	down	no	linc	chr4:23755943-23758481:+
MSTRG.38766	icl-vs-cpt	up	no	linc	chr4:23918752-23919313:-
MSTRG.38988	icl-vs-cpt	down	no	linc	chr4:24718117-24718723:-
MSTRG.39012	icl-vs-cpt	up	no	antisense	chr4:24842134-24843656:+
MSTRG.39014	icl-vs-cpt	down	yes	antisense	chr4:24854907-24856115:-
MSTRG.39068	icl-vs-cpt	up	no	linc	chr4:25020701-25021276:-
MSTRG.39126	icl-vs-cpt	down	no	linc	chr4:25270346-25271834:-
MSTRG.39183	icl-vs-cpt	down	no	linc	chr4:25487849-25489049:+
MSTRG.39225	icl-vs-cpt	down	no	antisense	chr4:25687719-25694041:-
MSTRG.39581	icl-vs-cpt	up	yes	linc	chr4:27349892-27352014:+
MSTRG.39676	icl-vs-cpt	up	yes	linc	chr4:27728122-27729716:-
MSTRG.3974	icl-vs-cpt	up	no	antisense	chr1:21703388-21707440:+
MSTRG.39771	icl-vs-cpt	down	yes	linc	chr4:28174639-28175679:-
MSTRG.39945	icl-vs-cpt	down	no	linc	chr4:29199477-29199787:+
MSTRG.4007	icl-vs-cpt	up	no	linc	chr1:22011433-22012402:-
MSTRG.40086	icl-vs-cpt	up	no	antisense	chr4:29799871-29801670:-
MSTRG.40159	icl-vs-cpt	down	no	linc	chr4:30213718-30214375:-
MSTRG.4017	icl-vs-cpt	up	yes	linc	chr1:22031241-22033999:-
MSTRG.40455	icl-vs-cpt	up	yes	antisense	chr4:31401042-31402140:+
MSTRG.4047	icl-vs-cpt	up	no	antisense	chr1:22325489-22325856:-
MSTRG.40512	icl-vs-cpt	up	no	linc	chr4:31519589-31519976:-
MSTRG.40542	icl-vs-cpt	up	yes	linc	chr4:31645311-31645909:-
MSTRG.40593	icl-vs-cpt	down	no	linc	chr4:31813529-31814412:+
MSTRG.40635	icl-vs-cpt	up	no	antisense	chr4:31937633-31938738:+
MSTRG.40665	icl-vs-cpt	up	no	antisense	chr4:32023799-32024245:-
MSTRG.40902	icl-vs-cpt	down	no	antisense	chr4:32892890-32897155:-
MSTRG.41020	icl-vs-cpt	up	no	antisense	chr4:33385213-33388638:-
MSTRG.41241	icl-vs-cpt	down	no	linc	chr4:34312496-34313122:+
MSTRG.41323	icl-vs-cpt	down	no	linc	chr4:34588914-34589366:+
MSTRG.41731	icl-vs-cpt	up	no	linc	chr5:680200-680869:+
MSTRG.41749	icl-vs-cpt	up	no	linc	chr5:763321-763903:-
MSTRG.41828	icl-vs-cpt	down	yes	linc	chr5:1026071-1027294:+
MSTRG.41854	icl-vs-cpt	up	yes	linc	chr5:1160471-1171782:+
MSTRG.41989	icl-vs-cpt	down	no	linc	chr5:1875859-1876811:+
MSTRG.42006	icl-vs-cpt	up	no	linc	chr5:1962978-1963394:+
MSTRG.42028	icl-vs-cpt	up	yes	linc	chr5:2059548-2060385:-
MSTRG.42139	icl-vs-cpt	up	yes	antisense	chr5:2445487-2447232:+
MSTRG.42198	icl-vs-cpt	up	no	antisense	chr5:2676025-2676321:+
MSTRG.42230	icl-vs-cpt	up	no	antisense	chr5:2751678-2752408:+
MSTRG.42286	icl-vs-cpt	down	no	linc	chr5:2992318-2993052:+
MSTRG.42398	icl-vs-cpt	up	no	linc	chr5:3548055-3548490:+
MSTRG.4240	icl-vs-cpt	up	no	linc	chr1:23418053-23418698:-
MSTRG.42467	icl-vs-cpt	down	no	linc	chr5:3860490-3866596:+
MSTRG.42605	icl-vs-cpt	up	no	linc	chr5:4801720-4803247:-
MSTRG.42698	icl-vs-cpt	up	no	linc	chr5:5633398-5634080:-
MSTRG.42750	icl-vs-cpt	down	yes	linc	chr5:6051360-6055122:+
MSTRG.42870	icl-vs-cpt	up	no	linc	chr5:6951689-6952075:-
MSTRG.43027	icl-vs-cpt	up	no	linc	chr5:8195383-8195968:+
MSTRG.43199	icl-vs-cpt	up	no	linc	chr5:9941285-9946719:+
MSTRG.43240	icl-vs-cpt	up	no	linc	chr5:10676291-10678086:-
MSTRG.43328	icl-vs-cpt	down	no	linc	chr5:11542682-11543543:+
MSTRG.43391	icl-vs-cpt	down	no	linc	chr5:12250743-12253908:-
MSTRG.43504	icl-vs-cpt	up	no	linc	chr5:13489856-13493043:+
MSTRG.43598	icl-vs-cpt	down	no	linc	chr5:14130437-14130958:+
MSTRG.43618	icl-vs-cpt	down	no	linc	chr5:14321480-14322089:-
MSTRG.43621	icl-vs-cpt	down	no	linc	chr5:14367159-14369330:+
MSTRG.43771	icl-vs-cpt	down	yes	linc	chr5:15585401-15586211:-
MSTRG.43868	icl-vs-cpt	up	no	antisense	chr5:16298303-16300264:+
MSTRG.43885	icl-vs-cpt	down	no	linc	chr5:16442925-16445914:-
MSTRG.43987	icl-vs-cpt	down	no	linc	chr5:17118283-17121458:-
MSTRG.44032	icl-vs-cpt	up	no	antisense	chr5:17361228-17362097:+
MSTRG.44035	icl-vs-cpt	down	no	antisense	chr5:17365445-17366912:+
MSTRG.44169	icl-vs-cpt	up	no	linc	chr5:18293401-18294488:-
MSTRG.44170	icl-vs-cpt	up	yes	linc	chr5:18306820-18308213:-
MSTRG.44190	icl-vs-cpt	down	no	linc	chr5:18347250-18348404:+
MSTRG.44204	icl-vs-cpt	up	no	linc	chr5:18458784-18461052:+
MSTRG.44500	icl-vs-cpt	down	yes	antisense	chr5:19893314-19898532:+
MSTRG.44527	icl-vs-cpt	down	no	linc	chr5:20032656-20033149:+
MSTRG.44827	icl-vs-cpt	down	no	antisense	chr5:21451319-21453880:-
MSTRG.44903	icl-vs-cpt	up	no	antisense	chr5:21756626-21758300:-
MSTRG.45271	icl-vs-cpt	down	no	linc	chr5:23629144-23629638:-
MSTRG.45286	icl-vs-cpt	down	no	linc	chr5:23633983-23635547:-
MSTRG.45324	icl-vs-cpt	down	no	antisense	chr5:23901542-23904732:+
MSTRG.45394	icl-vs-cpt	up	no	linc	chr5:24228398-24228847:-
MSTRG.45524	icl-vs-cpt	up	no	antisense	chr5:24679304-24679594:-
MSTRG.4596	icl-vs-cpt	up	no	linc	chr1:24989649-24994548:-
MSTRG.45991	icl-vs-cpt	down	no	linc	chr5:26699392-26699758:-
MSTRG.46070	icl-vs-cpt	down	no	antisense	chr5:27093644-27094007:-
MSTRG.46465	icl-vs-cpt	up	no	antisense	chr5:28665795-28666134:-
MSTRG.46491	icl-vs-cpt	up	no	linc	chr5:28807632-28808492:+
MSTRG.46596	icl-vs-cpt	up	no	linc	chr5:29187379-29189357:-
MSTRG.46614	icl-vs-cpt	down	no	linc	chr5:29263716-29265849:-
MSTRG.46625	icl-vs-cpt	down	no	antisense	chr5:29293390-29298148:+
MSTRG.46789	icl-vs-cpt	up	no	antisense	chr6:287703-289922:+
MSTRG.47013	icl-vs-cpt	up	no	linc	chr6:1175760-1177686:-
MSTRG.47014	icl-vs-cpt	up	yes	linc	chr6:1211907-1212912:+
MSTRG.47031	icl-vs-cpt	up	no	antisense	chr6:1184332-1190608:+
MSTRG.47166	icl-vs-cpt	up	no	linc	chr6:1807427-1807766:-
MSTRG.47292	icl-vs-cpt	up	no	linc	chr6:2247269-2247766:+
MSTRG.47619	icl-vs-cpt	down	no	antisense	chr6:3470758-3471262:+
MSTRG.477	icl-vs-cpt	down	no	linc	chr1:1920803-1927558:-
MSTRG.47755	icl-vs-cpt	up	no	linc	chr6:4067290-4068186:-
MSTRG.48354	icl-vs-cpt	up	no	linc	chr6:6917291-6921372:-
MSTRG.48391	icl-vs-cpt	up	yes	antisense	chr6:7058461-7059492:+
MSTRG.48399	icl-vs-cpt	up	no	antisense	chr6:7078569-7079925:-
MSTRG.48430	icl-vs-cpt	down	no	antisense	chr6:7204747-7206708:-
MSTRG.48497	icl-vs-cpt	up	no	linc	chr6:7551494-7551932:+
MSTRG.48534	icl-vs-cpt	down	no	linc	chr6:7764984-7765830:-
MSTRG.48687	icl-vs-cpt	up	no	linc	chr6:8927766-8930659:-
MSTRG.48772	icl-vs-cpt	up	no	linc	chr6:9551255-9551653:+
MSTRG.48896	icl-vs-cpt	down	no	linc	chr6:10616124-10618205:+
MSTRG.49044	icl-vs-cpt	up	no	antisense	chr6:11452733-11453078:-
MSTRG.49064	icl-vs-cpt	down	no	antisense	chr6:11603927-11606532:+
MSTRG.49100	icl-vs-cpt	up	no	linc	chr6:11767391-11778170:+
MSTRG.49130	icl-vs-cpt	down	no	antisense	chr6:12134462-12136129:+
MSTRG.49150	icl-vs-cpt	up	no	linc	chr6:12268374-12270988:+
MSTRG.49381	icl-vs-cpt	down	no	antisense	chr6:13901329-13901729:+
MSTRG.49434	icl-vs-cpt	up	no	linc	chr6:14451562-14454300:+
MSTRG.49446	icl-vs-cpt	up	yes	linc	chr6:14471787-14473361:+
MSTRG.49470	icl-vs-cpt	down	yes	linc	chr6:14667247-14671984:-
MSTRG.49514	icl-vs-cpt	down	no	linc	chr6:15165471-15166127:+
MSTRG.4954	icl-vs-cpt	down	no	antisense	chr1:27018532-27021614:+
MSTRG.49648	icl-vs-cpt	down	no	linc	chr6:16056476-16057047:+
MSTRG.50	icl-vs-cpt	up	no	antisense	chr1:134502-135211:-
MSTRG.50277	icl-vs-cpt	down	no	linc	chr6:21103677-21104780:-
MSTRG.50285	icl-vs-cpt	up	no	linc	chr6:21152710-21160614:-
MSTRG.50286	icl-vs-cpt	down	no	linc	chr6:21159050-21159406:-
MSTRG.50369	icl-vs-cpt	up	no	linc	chr6:21829009-21831001:+
MSTRG.50370	icl-vs-cpt	up	no	linc	chr6:21856674-21857882:-
MSTRG.50565	icl-vs-cpt	up	no	linc	chr6:23250407-23251166:+
MSTRG.50662	icl-vs-cpt	up	yes	linc	chr6:23795570-23798451:+
MSTRG.5088	icl-vs-cpt	down	no	linc	chr1:27542229-27542640:+
MSTRG.51034	icl-vs-cpt	up	no	linc	chr6:25949709-25952909:+
MSTRG.51237	icl-vs-cpt	down	no	linc	chr6:26984186-26984922:-
MSTRG.51596	icl-vs-cpt	up	yes	linc	chr6:28677271-28678483:+
MSTRG.51632	icl-vs-cpt	down	no	antisense	chr6:28805156-28806805:+
MSTRG.51766	icl-vs-cpt	up	no	linc	chr6:29413352-29413784:-
MSTRG.51827	icl-vs-cpt	up	no	antisense	chr6:29725373-29725685:-
MSTRG.5225	icl-vs-cpt	up	no	linc	chr1:28183032-28186656:-
MSTRG.52339	icl-vs-cpt	down	no	linc	chr7:772143-773740:+
MSTRG.52387	icl-vs-cpt	up	no	linc	chr7:1058769-1059802:-
MSTRG.52477	icl-vs-cpt	up	no	linc	chr7:1484826-1485160:-
MSTRG.52657	icl-vs-cpt	down	no	linc	chr7:2245193-2245686:+
MSTRG.52772	icl-vs-cpt	up	no	antisense	chr7:3128329-3128724:+
MSTRG.52798	icl-vs-cpt	up	no	linc	chr7:3214548-3215405:+
MSTRG.52799	icl-vs-cpt	down	no	linc	chr7:3218086-3218907:+
MSTRG.52878	icl-vs-cpt	up	no	antisense	chr7:3566532-3567128:+
MSTRG.52968	icl-vs-cpt	down	no	antisense	chr7:3919429-3920948:-
MSTRG.53080	icl-vs-cpt	up	yes	antisense	chr7:4492689-4496093:-
MSTRG.53159	icl-vs-cpt	down	no	linc	chr7:5022621-5022948:-
MSTRG.53246	icl-vs-cpt	down	no	linc	chr7:5483599-5484362:+
MSTRG.53260	icl-vs-cpt	up	no	linc	chr7:5538324-5540673:-
MSTRG.53289	icl-vs-cpt	up	no	antisense	chr7:5667468-5668155:-
MSTRG.53555	icl-vs-cpt	up	no	linc	chr7:7813952-7814694:-
MSTRG.53593	icl-vs-cpt	up	no	linc	chr7:8205477-8206137:-
MSTRG.53631	icl-vs-cpt	up	no	linc	chr7:8610507-8613146:+
MSTRG.53660	icl-vs-cpt	up	no	linc	chr7:8775597-8777526:+
MSTRG.53669	icl-vs-cpt	up	no	linc	chr7:8898333-8898841:-
MSTRG.53698	icl-vs-cpt	up	yes	linc	chr7:9095393-9096972:-
MSTRG.53768	icl-vs-cpt	up	no	linc	chr7:10097143-10097866:+
MSTRG.53796	icl-vs-cpt	up	no	antisense	chr7:10421827-10429771:-
MSTRG.53957	icl-vs-cpt	up	no	linc	chr7:11667858-11669691:+
MSTRG.5414	icl-vs-cpt	up	no	antisense	chr1:28978066-28978352:-
MSTRG.54227	icl-vs-cpt	up	yes	linc	chr7:14206526-14210540:-
MSTRG.54301	icl-vs-cpt	down	no	linc	chr7:14680650-14680958:-
MSTRG.54328	icl-vs-cpt	down	yes	linc	chr7:14993490-14995980:-
MSTRG.54452	icl-vs-cpt	up	no	linc	chr7:15986565-15987180:+
MSTRG.54855	icl-vs-cpt	up	no	linc	chr7:18843748-18844270:+
MSTRG.54893	icl-vs-cpt	up	yes	linc	chr7:19166545-19179140:+
MSTRG.55062	icl-vs-cpt	down	no	linc	chr7:20178100-20179053:-
MSTRG.55067	icl-vs-cpt	up	no	antisense	chr7:20324257-20325137:+
MSTRG.55306	icl-vs-cpt	down	no	linc	chr7:21723529-21724279:-
MSTRG.55952	icl-vs-cpt	down	no	linc	chr7:24642091-24643445:+
MSTRG.55958	icl-vs-cpt	down	no	linc	chr7:24663062-24663525:+
MSTRG.56074	icl-vs-cpt	down	yes	linc	chr7:25213797-25214483:+
MSTRG.56169	icl-vs-cpt	up	no	antisense	chr7:25524532-25524932:-
MSTRG.56291	icl-vs-cpt	up	no	antisense	chr7:26017219-26019427:+
MSTRG.56377	icl-vs-cpt	up	no	linc	chr7:26399768-26401375:+
MSTRG.56471	icl-vs-cpt	up	no	antisense	chr7:27064981-27069014:-
MSTRG.56490	icl-vs-cpt	up	no	antisense	chr7:27135939-27136466:-
MSTRG.56508	icl-vs-cpt	down	no	linc	chr7:27228339-27228974:+
MSTRG.56513	icl-vs-cpt	down	no	linc	chr7:27259387-27265826:+
MSTRG.56523	icl-vs-cpt	down	no	linc	chr7:27458303-27459038:-
MSTRG.56524	icl-vs-cpt	down	no	linc	chr7:27459303-27462842:-
MSTRG.56637	icl-vs-cpt	up	no	antisense	chr7:27632625-27633547:-
MSTRG.56878	icl-vs-cpt	up	yes	antisense	chr7:28650508-28651865:-
MSTRG.57038	icl-vs-cpt	down	no	antisense	chr7:29226213-29226713:-
MSTRG.57070	icl-vs-cpt	down	no	linc	chr7:29403400-29403773:+
MSTRG.57340	icl-vs-cpt	down	no	antisense	chr8:721691-722619:+
MSTRG.57364	icl-vs-cpt	up	no	linc	chr8:798322-798733:-
MSTRG.57538	icl-vs-cpt	up	no	linc	chr8:1779726-1780829:+
MSTRG.57539	icl-vs-cpt	up	no	linc	chr8:1807155-1809466:+
MSTRG.57880	icl-vs-cpt	down	yes	linc	chr8:3951863-3952313:-
MSTRG.57952	icl-vs-cpt	up	no	linc	chr8:4437928-4438287:-
MSTRG.58018	icl-vs-cpt	up	no	antisense	chr8:4950465-4953788:-
MSTRG.58059	icl-vs-cpt	up	no	linc	chr8:5282595-5282951:+
MSTRG.58068	icl-vs-cpt	up	no	antisense	chr8:5314699-5316043:-
MSTRG.58342	icl-vs-cpt	up	no	linc	chr8:7467671-7468923:+
MSTRG.58423	icl-vs-cpt	up	no	antisense	chr8:7980630-7988225:-
MSTRG.58425	icl-vs-cpt	up	no	linc	chr8:7986059-7988171:+
MSTRG.58479	icl-vs-cpt	up	no	linc	chr8:8070829-8071429:-
MSTRG.58480	icl-vs-cpt	up	no	linc	chr8:8104161-8104579:-
MSTRG.58614	icl-vs-cpt	up	no	linc	chr8:8967193-8967683:-
MSTRG.58615	icl-vs-cpt	up	no	linc	chr8:8972390-8977532:-
MSTRG.58793	icl-vs-cpt	up	no	linc	chr8:10460901-10461631:+
MSTRG.58839	icl-vs-cpt	down	no	antisense	chr8:10759619-10759960:-
MSTRG.58874	icl-vs-cpt	down	no	linc	chr8:11193462-11199903:-
MSTRG.58935	icl-vs-cpt	down	no	linc	chr8:11663812-11669512:-
MSTRG.58937	icl-vs-cpt	down	no	linc	chr8:11669703-11670164:+
MSTRG.58940	icl-vs-cpt	up	no	linc	chr8:11639833-11642867:+
MSTRG.59131	icl-vs-cpt	down	no	linc	chr8:13631090-13632963:-
MSTRG.59167	icl-vs-cpt	up	no	antisense	chr8:13947886-13950338:-
MSTRG.59195	icl-vs-cpt	up	no	antisense	chr8:14230540-14241072:+
MSTRG.59251	icl-vs-cpt	up	yes	linc	chr8:14681070-14682696:-
MSTRG.59284	icl-vs-cpt	up	no	linc	chr8:14917988-14920159:-
MSTRG.59286	icl-vs-cpt	up	yes	linc	chr8:14927113-14928078:+
MSTRG.59373	icl-vs-cpt	down	yes	antisense	chr8:15723015-15734403:+
MSTRG.59396	icl-vs-cpt	up	yes	linc	chr8:16255168-16257091:-
MSTRG.59397	icl-vs-cpt	up	no	linc	chr8:16292794-16294905:-
MSTRG.59410	icl-vs-cpt	down	no	antisense	chr8:16373522-16374042:-
MSTRG.59462	icl-vs-cpt	down	no	linc	chr8:16916569-16917450:-
MSTRG.59656	icl-vs-cpt	down	no	linc	chr8:18420401-18421013:-
MSTRG.59710	icl-vs-cpt	down	no	linc	chr8:18755953-18756923:+
MSTRG.59720	icl-vs-cpt	down	yes	antisense	chr8:18770275-18771451:+
MSTRG.59753	icl-vs-cpt	up	yes	linc	chr8:19092082-19093360:+
MSTRG.59908	icl-vs-cpt	down	no	linc	chr8:20087537-20090580:-
MSTRG.59986	icl-vs-cpt	down	yes	linc	chr8:20642098-20644334:+
MSTRG.60070	icl-vs-cpt	up	no	antisense	chr8:21020123-21021901:+
MSTRG.60078	icl-vs-cpt	up	yes	linc	chr8:21096062-21097551:+
MSTRG.60167	icl-vs-cpt	down	no	linc	chr8:21648991-21649819:+
MSTRG.60204	icl-vs-cpt	down	no	linc	chr8:21903824-21904477:+
MSTRG.60234	icl-vs-cpt	down	no	antisense	chr8:22096835-22101125:-
MSTRG.60236	icl-vs-cpt	up	no	linc	chr8:22119198-22119590:+
MSTRG.60284	icl-vs-cpt	up	no	linc	chr8:22979238-22979865:-
MSTRG.604	icl-vs-cpt	down	no	linc	chr1:2459425-2462703:+
MSTRG.60549	icl-vs-cpt	up	yes	linc	chr8:23886772-23889274:+
MSTRG.60776	icl-vs-cpt	down	no	antisense	chr8:24831652-24832066:+
MSTRG.60845	icl-vs-cpt	down	no	antisense	chr8:25037057-25037568:-
MSTRG.6089	icl-vs-cpt	down	no	linc	chr1:31845830-31846323:-
MSTRG.609	icl-vs-cpt	down	no	linc	chr1:2481153-2483773:+
MSTRG.6100	icl-vs-cpt	down	no	antisense	chr1:31836738-31837917:+
MSTRG.6107	icl-vs-cpt	down	no	linc	chr1:31898082-31898385:+
MSTRG.61161	icl-vs-cpt	up	no	antisense	chr8:26431673-26432816:+
MSTRG.61234	icl-vs-cpt	up	yes	antisense	chr8:26753049-26754288:-
MSTRG.61364	icl-vs-cpt	up	yes	linc	chr8:27264267-27266955:-
MSTRG.61394	icl-vs-cpt	down	no	antisense	chr8:27376423-27377108:+
MSTRG.61707	icl-vs-cpt	up	no	linc	chr9:324230-326152:+
MSTRG.61871	icl-vs-cpt	up	no	linc	chr9:1436076-1438618:-
MSTRG.61881	icl-vs-cpt	down	yes	linc	chr9:1514898-1519904:-
MSTRG.61889	icl-vs-cpt	down	no	linc	chr9:1610316-1610819:-
MSTRG.61931	icl-vs-cpt	up	yes	linc	chr9:2028812-2035955:-
MSTRG.61983	icl-vs-cpt	down	no	linc	chr9:2482502-2483155:+
MSTRG.6203	icl-vs-cpt	up	yes	linc	chr1:32283064-32283910:+
MSTRG.62237	icl-vs-cpt	down	no	linc	chr9:4674428-4675406:-
MSTRG.62348	icl-vs-cpt	up	no	linc	chr9:5681791-5682099:-
MSTRG.62427	icl-vs-cpt	up	no	linc	chr9:6373252-6373594:+
MSTRG.62498	icl-vs-cpt	down	no	linc	chr9:7256136-7258019:-
MSTRG.6250	icl-vs-cpt	down	no	linc	chr1:32496471-32500858:-
MSTRG.62695	icl-vs-cpt	up	yes	linc	chr9:9217088-9218120:-
MSTRG.6272	icl-vs-cpt	up	no	antisense	chr1:32547617-32548498:+
MSTRG.62833	icl-vs-cpt	up	no	linc	chr9:10361937-10362321:-
MSTRG.62846	icl-vs-cpt	up	no	linc	chr9:10474018-10476359:-
MSTRG.62914	icl-vs-cpt	down	yes	linc	chr9:11090580-11092527:-
MSTRG.62963	icl-vs-cpt	down	no	antisense	chr9:11556124-11556434:+
MSTRG.63087	icl-vs-cpt	down	no	antisense	chr9:12386438-12387155:-
MSTRG.63092	icl-vs-cpt	down	no	linc	chr9:12402558-12403639:-
MSTRG.63188	icl-vs-cpt	up	no	linc	chr9:12974297-12975092:-
MSTRG.63231	icl-vs-cpt	down	no	linc	chr9:13416217-13418252:+
MSTRG.63275	icl-vs-cpt	up	yes	linc	chr9:13616832-13620003:+
MSTRG.63405	icl-vs-cpt	down	yes	antisense	chr9:14566486-14567336:-
MSTRG.63408	icl-vs-cpt	up	no	linc	chr9:14534121-14534481:-
MSTRG.63505	icl-vs-cpt	down	no	antisense	chr9:15073247-15077626:+
MSTRG.63511	icl-vs-cpt	down	no	linc	chr9:15149450-15150417:+
MSTRG.63546	icl-vs-cpt	up	yes	antisense	chr9:15332334-15333069:-
MSTRG.63556	icl-vs-cpt	down	no	linc	chr9:15362277-15362938:-
MSTRG.63602	icl-vs-cpt	down	no	antisense	chr9:15587045-15588988:+
MSTRG.64046	icl-vs-cpt	down	yes	linc	chr9:17793121-17794531:-
MSTRG.64058	icl-vs-cpt	up	no	linc	chr9:17840623-17841083:+
MSTRG.64189	icl-vs-cpt	up	no	antisense	chr9:18431773-18432822:-
MSTRG.64370	icl-vs-cpt	down	no	antisense	chr9:19202742-19203792:-
MSTRG.64425	icl-vs-cpt	up	no	linc	chr9:19388903-19390085:+
MSTRG.64431	icl-vs-cpt	down	no	linc	chr9:19409955-19411799:-
MSTRG.64555	icl-vs-cpt	down	no	linc	chr9:19849996-19850609:-
MSTRG.64626	icl-vs-cpt	up	no	antisense	chr9:20083158-20085058:+
MSTRG.64704	icl-vs-cpt	up	no	antisense	chr9:20335536-20336815:+
MSTRG.64901	icl-vs-cpt	down	no	linc	chr9:21174688-21175186:+
MSTRG.65103	icl-vs-cpt	up	no	linc	chr9:22021301-22022704:+
MSTRG.65352	icl-vs-cpt	down	yes	linc	chrAP008247:44063-44887:-
MSTRG.65369	icl-vs-cpt	up	no	linc	chrSyng_TIGR_021:1-2480:+
MSTRG.65385	icl-vs-cpt	up	no	linc	chrSyng_TIGR_045:4192-6449:-
MSTRG.7127	icl-vs-cpt	up	no	linc	chr1:36308179-36311080:-
MSTRG.7236	icl-vs-cpt	up	no	antisense	chr1:36769056-36769875:-
MSTRG.7374	icl-vs-cpt	up	no	antisense	chr1:37427717-37441214:+
MSTRG.7640	icl-vs-cpt	up	no	antisense	chr1:38449689-38450442:+
MSTRG.7641	icl-vs-cpt	down	no	linc	chr1:38463415-38464446:-
MSTRG.7805	icl-vs-cpt	up	no	antisense	chr1:39114201-39116104:+
MSTRG.7810	icl-vs-cpt	down	no	antisense	chr1:39118147-39127408:-
MSTRG.7834	icl-vs-cpt	down	yes	antisense	chr1:39238878-39239451:+
MSTRG.7936	icl-vs-cpt	up	yes	linc	chr1:39693403-39693949:-
MSTRG.8378	icl-vs-cpt	up	no	linc	chr1:41562199-41562667:+
MSTRG.8448	icl-vs-cpt	up	no	linc	chr1:41855504-41855895:-
MSTRG.8668	icl-vs-cpt	down	no	linc	chr1:42661472-42662402:+
MSTRG.8828	icl-vs-cpt	up	no	linc	chr10:162180-165522:-
MSTRG.8847	icl-vs-cpt	up	no	linc	chr10:213413-213837:+
MSTRG.8862	icl-vs-cpt	down	no	antisense	chr10:408744-410020:+
MSTRG.8929	icl-vs-cpt	up	no	linc	chr10:858816-861322:+
MSTRG.8955	icl-vs-cpt	down	no	linc	chr10:997595-997895:-
MSTRG.8986	icl-vs-cpt	up	no	linc	chr10:1200322-1203165:+
MSTRG.9229	icl-vs-cpt	down	no	antisense	chr10:3068493-3071116:+
MSTRG.9379	icl-vs-cpt	down	no	linc	chr10:4544029-4544569:+
MSTRG.9411	icl-vs-cpt	down	no	linc	chr10:4761420-4762054:+
MSTRG.9448	icl-vs-cpt	down	no	linc	chr10:5252595-5254662:+
MSTRG.9472	icl-vs-cpt	up	no	linc	chr10:5526594-5528607:+
MSTRG.9610	icl-vs-cpt	up	no	antisense	chr10:6738725-6739206:+
MSTRG.9616	icl-vs-cpt	up	no	linc	chr10:6744800-6745395:-
MSTRG.9621	icl-vs-cpt	up	no	linc	chr10:6864500-6866348:+
MSTRG.9638	icl-vs-cpt	up	no	linc	chr10:7048494-7049255:-
MSTRG.9662	icl-vs-cpt	down	no	linc	chr10:7250469-7252582:+
MSTRG.9722	icl-vs-cpt	up	no	linc	chr10:7745388-7746660:+
MSTRG.9752	icl-vs-cpt	up	no	linc	chr10:8042642-8044326:+
MSTRG.9792	icl-vs-cpt	down	no	antisense	chr10:8516201-8518664:-
MSTRG.9838	icl-vs-cpt	up	no	linc	chr10:8985334-8988828:-
MSTRG.9923	icl-vs-cpt	up	no	linc	chr10:9802949-9803430:-
MSTRG.9942	icl-vs-cpt	up	no	linc	chr10:9951571-9953091:-
MSTRG.9965	icl-vs-cpt	down	yes	antisense	chr10:10079072-10083569:+
MSTRG.9980	icl-vs-cpt	down	yes	linc	chr10:10198071-10198489:-
MSTRG.9992	icl-vs-cpt	down	no	linc	chr10:10305251-10311245:-
MSTRG.10051	fcl-vs-icl	down	no	linc	chr10:11256619-11260130:+
MSTRG.10138	fcl-vs-icl	up	no	linc	chr10:11815743-11817824:-
MSTRG.10195	fcl-vs-icl	up	no	linc	chr10:12122137-12125225:-
MSTRG.1027	fcl-vs-icl	up	no	linc	chr1:4205119-4208179:-
MSTRG.10361	fcl-vs-icl	down	yes	linc	chr10:12897809-12898264:-
MSTRG.10381	fcl-vs-icl	up	no	antisense	chr10:12982625-12983816:-
MSTRG.10486	fcl-vs-icl	up	no	linc	chr10:13877878-13878562:+
MSTRG.10499	fcl-vs-icl	down	no	linc	chr10:13929815-13931547:-
MSTRG.10542	fcl-vs-icl	down	no	antisense	chr10:14324090-14327099:+
MSTRG.106	fcl-vs-icl	up	no	antisense	chr1:305436-306513:-
MSTRG.10853	fcl-vs-icl	up	no	antisense	chr10:16152927-16156032:+
MSTRG.1093	fcl-vs-icl	down	no	linc	chr1:4459229-4459789:+
MSTRG.10933	fcl-vs-icl	down	no	linc	chr10:16813794-16814541:+
MSTRG.11008	fcl-vs-icl	up	no	linc	chr10:17177954-17179397:-
MSTRG.11074	fcl-vs-icl	up	no	linc	chr10:17549810-17550448:+
MSTRG.11165	fcl-vs-icl	down	no	antisense	chr10:17963994-17964275:+
MSTRG.1117	fcl-vs-icl	down	no	antisense	chr1:4622163-4622743:+
MSTRG.11320	fcl-vs-icl	down	no	antisense	chr10:18586091-18588440:+
MSTRG.11390	fcl-vs-icl	down	no	linc	chr10:18886002-18886304:-
MSTRG.11497	fcl-vs-icl	down	no	antisense	chr10:19202190-19204485:+
MSTRG.11657	fcl-vs-icl	down	no	linc	chr10:19922251-19924019:+
MSTRG.11784	fcl-vs-icl	up	no	antisense	chr10:20556684-20556991:-
MSTRG.11886	fcl-vs-icl	down	no	linc	chr10:21375867-21377402:-
MSTRG.11926	fcl-vs-icl	up	no	linc	chr10:21553194-21553576:-
MSTRG.1211	fcl-vs-icl	up	no	linc	chr1:5028302-5030051:-
MSTRG.12138	fcl-vs-icl	down	no	linc	chr10:21263733-21268290:+
MSTRG.12184	fcl-vs-icl	up	no	antisense	chr10:22054758-22055476:-
MSTRG.12366	fcl-vs-icl	up	no	linc	chr10:22673214-22673911:-
MSTRG.12378	fcl-vs-icl	down	no	linc	chr10:22737017-22738775:+
MSTRG.1240	fcl-vs-icl	down	no	linc	chr1:5209708-5211006:-
MSTRG.12550	fcl-vs-icl	down	no	linc	chr11:216225-219281:-
MSTRG.12567	fcl-vs-icl	up	no	antisense	chr11:263802-265633:+
MSTRG.12667	fcl-vs-icl	down	no	linc	chr11:673480-675622:+
MSTRG.12701	fcl-vs-icl	up	no	linc	chr11:784336-784930:+
MSTRG.12740	fcl-vs-icl	down	no	antisense	chr11:890510-891056:+
MSTRG.12754	fcl-vs-icl	up	no	linc	chr11:1051821-1052119:+
MSTRG.12851	fcl-vs-icl	down	no	antisense	chr11:1453615-1454411:-
MSTRG.13199	fcl-vs-icl	down	no	antisense	chr11:3023712-3024371:-
MSTRG.13212	fcl-vs-icl	up	no	linc	chr11:3115850-3116398:-
MSTRG.13268	fcl-vs-icl	down	no	linc	chr11:3472734-3473664:-
MSTRG.13487	fcl-vs-icl	up	no	antisense	chr11:4564032-4565332:+
MSTRG.13533	fcl-vs-icl	up	no	linc	chr11:5103345-5103927:-
MSTRG.13535	fcl-vs-icl	down	no	antisense	chr11:5097010-5098975:-
MSTRG.13712	fcl-vs-icl	down	no	linc	chr11:6151932-6152307:+
MSTRG.13899	fcl-vs-icl	up	no	antisense	chr11:7696162-7697105:+
MSTRG.13967	fcl-vs-icl	up	no	linc	chr11:8007743-8008091:+
MSTRG.13993	fcl-vs-icl	down	no	linc	chr11:8186755-8187505:-
MSTRG.14008	fcl-vs-icl	down	no	linc	chr11:8277041-8278396:-
MSTRG.14022	fcl-vs-icl	down	no	linc	chr11:8301780-8303791:-
MSTRG.14074	fcl-vs-icl	up	no	linc	chr11:8877000-8879209:-
MSTRG.14108	fcl-vs-icl	up	no	linc	chr11:9262572-9264336:+
MSTRG.14147	fcl-vs-icl	up	no	linc	chr11:9667409-9667821:+
MSTRG.14194	fcl-vs-icl	up	no	linc	chr11:10001250-10002637:+
MSTRG.14261	fcl-vs-icl	up	no	antisense	chr11:10769689-10771300:+
MSTRG.14369	fcl-vs-icl	up	no	linc	chr11:12285488-12286732:-
MSTRG.14415	fcl-vs-icl	down	no	linc	chr11:12725013-12725599:-
MSTRG.14416	fcl-vs-icl	down	no	linc	chr11:12703894-12706795:-
MSTRG.14482	fcl-vs-icl	up	yes	linc	chr11:13683802-13686732:+
MSTRG.14483	fcl-vs-icl	up	no	antisense	chr11:13671619-13675410:-
MSTRG.14495	fcl-vs-icl	down	no	linc	chr11:13738214-13738513:-
MSTRG.14505	fcl-vs-icl	down	no	antisense	chr11:13755034-13759696:-
MSTRG.14542	fcl-vs-icl	down	no	antisense	chr11:14127382-14129760:+
MSTRG.14552	fcl-vs-icl	down	no	linc	chr11:14185917-14187500:-
MSTRG.14930	fcl-vs-icl	up	yes	antisense	chr11:16129803-16135844:+
MSTRG.15063	fcl-vs-icl	down	no	linc	chr11:17073770-17074066:-
MSTRG.15082	fcl-vs-icl	up	no	linc	chr11:17256809-17258423:+
MSTRG.15227	fcl-vs-icl	down	no	antisense	chr11:18857907-18860948:-
MSTRG.15266	fcl-vs-icl	up	no	antisense	chr11:19134182-19137430:+
MSTRG.15271	fcl-vs-icl	down	no	antisense	chr11:19118666-19120533:+
MSTRG.15327	fcl-vs-icl	up	no	antisense	chr11:19523532-19525203:-
MSTRG.1535	fcl-vs-icl	down	no	antisense	chr1:6655876-6663176:-
MSTRG.1536	fcl-vs-icl	up	no	linc	chr1:6656307-6658283:+
MSTRG.15376	fcl-vs-icl	up	no	linc	chr11:19911104-19916976:+
MSTRG.15394	fcl-vs-icl	down	no	linc	chr11:20000036-20001328:-
MSTRG.15548	fcl-vs-icl	up	no	antisense	chr11:20702041-20702639:-
MSTRG.15577	fcl-vs-icl	up	no	antisense	chr11:20837941-20839023:-
MSTRG.15624	fcl-vs-icl	down	no	linc	chr11:21304492-21307994:-
MSTRG.15668	fcl-vs-icl	up	no	linc	chr11:21728288-21728804:-
MSTRG.15746	fcl-vs-icl	up	no	antisense	chr11:22223157-22224338:-
MSTRG.15983	fcl-vs-icl	up	no	linc	chr11:23614402-23614998:-
MSTRG.16098	fcl-vs-icl	down	yes	linc	chr11:24338967-24341935:+
MSTRG.16119	fcl-vs-icl	up	no	linc	chr11:24603033-24604444:-
MSTRG.16135	fcl-vs-icl	down	no	linc	chr11:24723137-24723995:+
MSTRG.16162	fcl-vs-icl	up	no	linc	chr11:24960713-24961944:+
MSTRG.16293	fcl-vs-icl	down	no	linc	chr11:25966454-25968186:-
MSTRG.16418	fcl-vs-icl	up	no	linc	chr11:27031070-27031707:+
MSTRG.1645	fcl-vs-icl	up	no	antisense	chr1:7092102-7092793:-
MSTRG.16476	fcl-vs-icl	up	no	linc	chr11:27233040-27234137:+
MSTRG.16543	fcl-vs-icl	down	no	linc	chr11:27743701-27745337:-
MSTRG.16552	fcl-vs-icl	up	no	linc	chr11:27820985-27822028:+
MSTRG.16566	fcl-vs-icl	down	no	linc	chr11:27878653-27879650:-
MSTRG.16582	fcl-vs-icl	down	no	linc	chr11:28053777-28055853:-
MSTRG.16637	fcl-vs-icl	up	no	linc	chr11:28696432-28697510:-
MSTRG.16645	fcl-vs-icl	down	no	linc	chr11:28700723-28703035:+
MSTRG.16650	fcl-vs-icl	down	no	linc	chr11:28715333-28716143:+
MSTRG.16956	fcl-vs-icl	up	yes	antisense	chr12:818979-823960:+
MSTRG.17059	fcl-vs-icl	up	no	antisense	chr12:1174924-1176870:+
MSTRG.17087	fcl-vs-icl	up	no	antisense	chr12:1256119-1257510:-
MSTRG.17250	fcl-vs-icl	up	no	antisense	chr12:2087101-2088849:+
MSTRG.17358	fcl-vs-icl	down	yes	linc	chr12:2682795-2683298:-
MSTRG.17411	fcl-vs-icl	down	no	antisense	chr12:2969661-2974674:-
MSTRG.1745	fcl-vs-icl	up	no	linc	chr1:7485923-7486903:-
MSTRG.17657	fcl-vs-icl	up	no	antisense	chr12:4080140-4080476:+
MSTRG.17746	fcl-vs-icl	down	no	linc	chr12:4996561-4996973:-
MSTRG.17883	fcl-vs-icl	up	no	linc	chr12:5819615-5821211:+
MSTRG.1790	fcl-vs-icl	up	yes	linc	chr1:7705963-7707611:-
MSTRG.17904	fcl-vs-icl	up	no	linc	chr12:5903538-5903838:-
MSTRG.17911	fcl-vs-icl	down	yes	antisense	chr12:6119199-6121577:-
MSTRG.17946	fcl-vs-icl	up	no	linc	chr12:6423462-6424265:-
MSTRG.18083	fcl-vs-icl	down	no	linc	chr12:7315737-7316546:-
MSTRG.18540	fcl-vs-icl	down	no	linc	chr12:11085079-11085523:-
MSTRG.18582	fcl-vs-icl	down	no	antisense	chr12:11287091-11289658:-
MSTRG.18701	fcl-vs-icl	down	no	linc	chr12:12400001-12403094:-
MSTRG.18715	fcl-vs-icl	down	no	linc	chr12:12555449-12555925:-
MSTRG.18717	fcl-vs-icl	down	no	antisense	chr12:12426006-12428189:-
MSTRG.18736	fcl-vs-icl	up	no	linc	chr12:12796447-12799693:-
MSTRG.18776	fcl-vs-icl	down	no	linc	chr12:13413635-13419221:-
MSTRG.18777	fcl-vs-icl	down	no	linc	chr12:13413784-13419322:+
MSTRG.18799	fcl-vs-icl	down	no	antisense	chr12:13386371-13388433:-
MSTRG.18807	fcl-vs-icl	down	yes	linc	chr12:13404628-13404972:+
MSTRG.18820	fcl-vs-icl	down	no	linc	chr12:13568937-13569571:-
MSTRG.18857	fcl-vs-icl	down	no	linc	chr12:13994790-13995296:-
MSTRG.18958	fcl-vs-icl	up	no	linc	chr12:15104078-15106514:+
MSTRG.18982	fcl-vs-icl	up	yes	linc	chr12:15397416-15399050:+
MSTRG.18983	fcl-vs-icl	down	no	linc	chr12:15362610-15370509:-
MSTRG.1901	fcl-vs-icl	down	no	antisense	chr1:8301455-8301937:-
MSTRG.19052	fcl-vs-icl	up	no	linc	chr12:16811031-16812531:+
MSTRG.19071	fcl-vs-icl	down	no	linc	chr12:16939694-16946098:-
MSTRG.19088	fcl-vs-icl	down	no	linc	chr12:17353064-17358802:-
MSTRG.19304	fcl-vs-icl	up	no	linc	chr12:19502440-19502877:+
MSTRG.19308	fcl-vs-icl	up	no	antisense	chr12:19503533-19503916:+
MSTRG.19335	fcl-vs-icl	down	no	linc	chr12:19640627-19641992:+
MSTRG.19419	fcl-vs-icl	down	no	linc	chr12:20193029-20194856:-
MSTRG.19472	fcl-vs-icl	up	no	linc	chr12:20813532-20814008:-
MSTRG.19601	fcl-vs-icl	down	no	linc	chr12:21551031-21551348:-
MSTRG.19641	fcl-vs-icl	down	no	linc	chr12:21667804-21669456:+
MSTRG.19649	fcl-vs-icl	down	no	linc	chr12:21973074-21973536:+
MSTRG.19693	fcl-vs-icl	down	no	linc	chr12:22423826-22424288:-
MSTRG.19820	fcl-vs-icl	down	no	linc	chr12:23176829-23178814:-
MSTRG.20095	fcl-vs-icl	down	no	linc	chr12:24569382-24569968:+
MSTRG.20104	fcl-vs-icl	up	no	linc	chr12:24624643-24625926:-
MSTRG.2028	fcl-vs-icl	down	no	antisense	chr1:8740664-8742126:+
MSTRG.20417	fcl-vs-icl	down	no	linc	chr12:26292497-26297039:-
MSTRG.20635	fcl-vs-icl	up	no	antisense	chr12:27396230-27396806:-
MSTRG.21050	fcl-vs-icl	down	no	linc	chr2:1369800-1373837:+
MSTRG.21177	fcl-vs-icl	up	yes	antisense	chr2:1929849-1931172:+
MSTRG.21226	fcl-vs-icl	up	no	antisense	chr2:2100854-2101343:-
MSTRG.21259	fcl-vs-icl	down	no	linc	chr2:2255728-2256144:+
MSTRG.21349	fcl-vs-icl	down	no	linc	chr2:2377777-2378289:+
MSTRG.214	fcl-vs-icl	down	no	antisense	chr1:700645-702366:+
MSTRG.21429	fcl-vs-icl	down	no	antisense	chr2:3071569-3072387:+
MSTRG.21642	fcl-vs-icl	down	no	antisense	chr2:3995164-3996401:-
MSTRG.21646	fcl-vs-icl	up	no	antisense	chr2:4015735-4022352:+
MSTRG.21665	fcl-vs-icl	down	no	antisense	chr2:4093142-4094828:-
MSTRG.21777	fcl-vs-icl	up	no	linc	chr2:4525063-4527095:-
MSTRG.21810	fcl-vs-icl	down	no	linc	chr2:4634700-4636997:+
MSTRG.21812	fcl-vs-icl	down	no	linc	chr2:4643267-4644453:+
MSTRG.21924	fcl-vs-icl	up	yes	antisense	chr2:5067309-5070786:+
MSTRG.22196	fcl-vs-icl	down	no	linc	chr2:6258938-6260510:+
MSTRG.22209	fcl-vs-icl	up	no	linc	chr2:6317942-6318806:-
MSTRG.22260	fcl-vs-icl	down	no	linc	chr2:6538915-6540203:-
MSTRG.22265	fcl-vs-icl	down	no	antisense	chr2:6532492-6533100:+
MSTRG.22460	fcl-vs-icl	up	no	linc	chr2:7615521-7616379:-
MSTRG.22461	fcl-vs-icl	up	no	linc	chr2:7616688-7617310:-
MSTRG.22513	fcl-vs-icl	up	no	antisense	chr2:7937683-7938676:-
MSTRG.22533	fcl-vs-icl	up	no	linc	chr2:8002090-8002430:+
MSTRG.22680	fcl-vs-icl	up	no	antisense	chr2:8920652-8921315:-
MSTRG.22697	fcl-vs-icl	down	no	linc	chr2:9011319-9014207:+
MSTRG.22762	fcl-vs-icl	up	no	antisense	chr2:9516982-9517436:+
MSTRG.22795	fcl-vs-icl	down	no	antisense	chr2:9923114-9924932:+
MSTRG.22898	fcl-vs-icl	up	no	linc	chr2:10534345-10535176:-
MSTRG.22908	fcl-vs-icl	up	no	linc	chr2:10621939-10627714:+
MSTRG.23017	fcl-vs-icl	up	no	linc	chr2:11225351-11225812:-
MSTRG.23021	fcl-vs-icl	down	no	linc	chr2:11260177-11262728:-
MSTRG.23135	fcl-vs-icl	up	no	antisense	chr2:12070079-12079047:-
MSTRG.23145	fcl-vs-icl	up	no	linc	chr2:12155915-12156428:+
MSTRG.23235	fcl-vs-icl	up	no	linc	chr2:12858419-12858791:+
MSTRG.23251	fcl-vs-icl	down	no	antisense	chr2:12901579-12905121:-
MSTRG.23263	fcl-vs-icl	down	no	antisense	chr2:13003172-13003731:+
MSTRG.23338	fcl-vs-icl	down	no	linc	chr2:13669648-13675083:+
MSTRG.23373	fcl-vs-icl	down	no	linc	chr2:13851929-13854854:-
MSTRG.23425	fcl-vs-icl	down	no	linc	chr2:14169396-14171796:+
MSTRG.23451	fcl-vs-icl	up	no	linc	chr2:14685379-14686800:+
MSTRG.23463	fcl-vs-icl	down	no	linc	chr2:14965992-14967507:-
MSTRG.23464	fcl-vs-icl	down	no	linc	chr2:14966707-14969122:+
MSTRG.23861	fcl-vs-icl	up	no	linc	chr2:17673239-17673961:+
MSTRG.23866	fcl-vs-icl	down	no	linc	chr2:17759253-17764274:-
MSTRG.23883	fcl-vs-icl	down	no	linc	chr2:17859702-17860345:+
MSTRG.24040	fcl-vs-icl	up	no	linc	chr2:18798560-18799088:-
MSTRG.2424	fcl-vs-icl	down	no	linc	chr1:10940517-10942045:-
MSTRG.24311	fcl-vs-icl	up	no	linc	chr2:20581485-20582137:+
MSTRG.24337	fcl-vs-icl	up	no	linc	chr2:20688327-20690315:+
MSTRG.24438	fcl-vs-icl	down	no	linc	chr2:21135056-21135681:-
MSTRG.24678	fcl-vs-icl	down	yes	antisense	chr2:22296150-22305329:-
MSTRG.24679	fcl-vs-icl	down	yes	linc	chr2:22303638-22305274:+
MSTRG.24778	fcl-vs-icl	up	no	linc	chr2:22778846-22781955:-
MSTRG.25053	fcl-vs-icl	down	no	linc	chr2:24109788-24110424:-
MSTRG.251	fcl-vs-icl	up	no	linc	chr1:1007433-1009118:+
MSTRG.25112	fcl-vs-icl	up	no	linc	chr2:24341581-24342271:-
MSTRG.25419	fcl-vs-icl	up	no	antisense	chr2:25739226-25739729:+
MSTRG.25550	fcl-vs-icl	up	no	linc	chr2:26316475-26316826:-
MSTRG.2557	fcl-vs-icl	up	no	linc	chr1:11799071-11799502:+
MSTRG.256	fcl-vs-icl	down	no	linc	chr1:1001177-1001530:+
MSTRG.25826	fcl-vs-icl	up	yes	linc	chr2:27739005-27740174:-
MSTRG.26130	fcl-vs-icl	up	no	linc	chr2:29057920-29058360:+
MSTRG.26319	fcl-vs-icl	down	no	antisense	chr2:29829849-29830179:-
MSTRG.26625	fcl-vs-icl	down	no	linc	chr2:31035121-31035971:+
MSTRG.2681	fcl-vs-icl	down	no	linc	chr1:12627909-12628983:-
MSTRG.26900	fcl-vs-icl	up	no	linc	chr2:32122192-32124114:-
MSTRG.26947	fcl-vs-icl	down	yes	antisense	chr2:32337267-32348847:-
MSTRG.27029	fcl-vs-icl	down	no	linc	chr2:32710747-32715886:+
MSTRG.27070	fcl-vs-icl	down	no	linc	chr2:32955753-32956422:+
MSTRG.27175	fcl-vs-icl	up	no	antisense	chr2:33287757-33288872:+
MSTRG.27294	fcl-vs-icl	down	no	antisense	chr2:33800075-33801141:-
MSTRG.27389	fcl-vs-icl	down	yes	linc	chr2:34281969-34287115:+
MSTRG.27483	fcl-vs-icl	down	no	antisense	chr2:34493418-34494093:-
MSTRG.27733	fcl-vs-icl	up	no	linc	chr2:35436209-35437346:+
MSTRG.27795	fcl-vs-icl	down	no	antisense	chr2:35626609-35627685:-
MSTRG.2781	fcl-vs-icl	up	no	linc	chr1:13414900-13415249:-
MSTRG.27979	fcl-vs-icl	down	no	linc	chr3:379877-381189:+
MSTRG.27995	fcl-vs-icl	up	no	antisense	chr3:455549-457419:-
MSTRG.2803	fcl-vs-icl	down	no	linc	chr1:13521179-13521610:+
MSTRG.28205	fcl-vs-icl	down	no	antisense	chr3:1210019-1212352:-
MSTRG.28209	fcl-vs-icl	up	no	linc	chr3:1218900-1221193:+
MSTRG.28241	fcl-vs-icl	up	no	linc	chr3:1416086-1416541:+
MSTRG.28306	fcl-vs-icl	down	no	antisense	chr3:1631519-1634115:+
MSTRG.28555	fcl-vs-icl	up	no	linc	chr3:2540640-2541082:-
MSTRG.28666	fcl-vs-icl	down	no	linc	chr3:2996825-2997324:-
MSTRG.28683	fcl-vs-icl	down	no	linc	chr3:3065483-3066336:-
MSTRG.2886	fcl-vs-icl	down	no	linc	chr1:14083599-14086159:-
MSTRG.29311	fcl-vs-icl	down	no	linc	chr3:5386144-5386489:+
MSTRG.29363	fcl-vs-icl	down	no	linc	chr3:5600200-5603510:-
MSTRG.29375	fcl-vs-icl	up	no	linc	chr3:5665094-5665995:-
MSTRG.29388	fcl-vs-icl	up	no	linc	chr3:5694579-5697217:+
MSTRG.29405	fcl-vs-icl	up	no	antisense	chr3:5771582-5772032:-
MSTRG.29441	fcl-vs-icl	down	no	linc	chr3:5888156-5889663:+
MSTRG.29496	fcl-vs-icl	down	no	linc	chr3:6100720-6101998:+
MSTRG.29555	fcl-vs-icl	down	no	antisense	chr3:6327575-6328003:-
MSTRG.29557	fcl-vs-icl	down	no	antisense	chr3:6343294-6344992:-
MSTRG.2972	fcl-vs-icl	down	no	antisense	chr1:14587709-14588913:+
MSTRG.29790	fcl-vs-icl	up	no	linc	chr3:7495910-7497287:-
MSTRG.29980	fcl-vs-icl	down	no	antisense	chr3:8250332-8253408:-
MSTRG.30211	fcl-vs-icl	down	no	linc	chr3:9228502-9229294:-
MSTRG.30391	fcl-vs-icl	up	no	antisense	chr3:9896517-9897628:-
MSTRG.30414	fcl-vs-icl	down	no	linc	chr3:9964764-9965887:-
MSTRG.30655	fcl-vs-icl	up	no	linc	chr3:10945501-10946892:+
MSTRG.3095	fcl-vs-icl	down	no	linc	chr1:15415035-15416129:-
MSTRG.30964	fcl-vs-icl	up	no	linc	chr3:12365795-12367529:-
MSTRG.31281	fcl-vs-icl	down	no	linc	chr3:13989521-13989971:-
MSTRG.3167	fcl-vs-icl	up	no	linc	chr1:16202442-16205854:+
MSTRG.31676	fcl-vs-icl	up	no	linc	chr3:16272593-16273713:+
MSTRG.31678	fcl-vs-icl	up	no	linc	chr3:16273722-16274604:+
MSTRG.32249	fcl-vs-icl	down	no	linc	chr3:20522110-20524586:+
MSTRG.32340	fcl-vs-icl	down	no	linc	chr3:21055785-21056704:+
MSTRG.32503	fcl-vs-icl	up	no	antisense	chr3:22213746-22214531:-
MSTRG.3253	fcl-vs-icl	up	yes	antisense	chr1:16886169-16890306:-
MSTRG.32555	fcl-vs-icl	down	no	antisense	chr3:22541306-22542331:-
MSTRG.32674	fcl-vs-icl	down	no	linc	chr3:23392191-23398242:+
MSTRG.32816	fcl-vs-icl	down	no	linc	chr3:24457557-24457906:-
MSTRG.3282	fcl-vs-icl	up	no	antisense	chr1:17195300-17207786:+
MSTRG.32908	fcl-vs-icl	down	no	antisense	chr3:24902413-24902981:-
MSTRG.3291	fcl-vs-icl	up	no	antisense	chr1:17225537-17227358:-
MSTRG.32969	fcl-vs-icl	down	no	linc	chr3:25249481-25249976:-
MSTRG.33115	fcl-vs-icl	up	no	linc	chr3:26185231-26186020:-
MSTRG.33279	fcl-vs-icl	down	no	linc	chr3:27237128-27237509:+
MSTRG.3341	fcl-vs-icl	down	no	linc	chr1:17428353-17429376:+
MSTRG.33431	fcl-vs-icl	down	no	linc	chr3:28003948-28004309:-
MSTRG.33724	fcl-vs-icl	down	no	linc	chr3:29248894-29250428:-
MSTRG.3393	fcl-vs-icl	down	no	antisense	chr1:17785832-17794495:-
MSTRG.34096	fcl-vs-icl	up	no	linc	chr3:30993901-30994292:+
MSTRG.3426	fcl-vs-icl	down	no	linc	chr1:18033783-18035270:-
MSTRG.34467	fcl-vs-icl	up	no	linc	chr3:32336926-32337457:+
MSTRG.34627	fcl-vs-icl	up	no	antisense	chr3:32909883-32910273:-
MSTRG.3476	fcl-vs-icl	up	no	linc	chr1:18419417-18420040:-
MSTRG.35003	fcl-vs-icl	up	no	linc	chr3:34218110-34219594:-
MSTRG.35043	fcl-vs-icl	down	no	antisense	chr3:34354555-34355089:-
MSTRG.3531	fcl-vs-icl	up	no	linc	chr1:18623940-18624952:+
MSTRG.35325	fcl-vs-icl	up	no	linc	chr3:35400828-35401439:+
MSTRG.35326	fcl-vs-icl	up	yes	linc	chr3:35401911-35402711:+
MSTRG.35433	fcl-vs-icl	down	no	linc	chr3:35804991-35805589:+
MSTRG.35618	fcl-vs-icl	down	no	linc	chr4:129092-129798:+
MSTRG.35661	fcl-vs-icl	down	yes	linc	chr4:382979-383423:-
MSTRG.35833	fcl-vs-icl	down	no	linc	chr4:1434652-1436855:+
MSTRG.35886	fcl-vs-icl	down	no	antisense	chr4:1997419-1998043:+
MSTRG.35893	fcl-vs-icl	up	no	linc	chr4:2074598-2082126:-
MSTRG.35911	fcl-vs-icl	down	no	linc	chr4:2337803-2338677:-
MSTRG.36108	fcl-vs-icl	down	no	linc	chr4:4550668-4553025:-
MSTRG.36125	fcl-vs-icl	up	no	linc	chr4:4773298-4774782:+
MSTRG.36140	fcl-vs-icl	up	no	linc	chr4:4912227-4912738:+
MSTRG.36151	fcl-vs-icl	up	no	linc	chr4:5129352-5130896:-
MSTRG.36242	fcl-vs-icl	up	yes	antisense	chr4:5916062-5916783:+
MSTRG.36244	fcl-vs-icl	up	yes	linc	chr4:5923846-5924761:-
MSTRG.36262	fcl-vs-icl	up	yes	linc	chr4:6265978-6268801:-
MSTRG.36302	fcl-vs-icl	up	no	linc	chr4:6569387-6570599:-
MSTRG.36347	fcl-vs-icl	up	no	antisense	chr4:6925115-6926848:+
MSTRG.36348	fcl-vs-icl	down	no	linc	chr4:6961793-6965607:+
MSTRG.36541	fcl-vs-icl	down	yes	antisense	chr4:8477696-8480989:+
MSTRG.36574	fcl-vs-icl	down	no	linc	chr4:8685012-8690295:-
MSTRG.36610	fcl-vs-icl	up	no	linc	chr4:9549414-9553620:-
MSTRG.36665	fcl-vs-icl	down	no	antisense	chr4:10069907-10075383:-
MSTRG.36730	fcl-vs-icl	down	no	linc	chr4:11090797-11092371:-
MSTRG.36731	fcl-vs-icl	down	no	linc	chr4:11091866-11093991:+
MSTRG.36755	fcl-vs-icl	down	no	linc	chr4:11348488-11352042:+
MSTRG.3683	fcl-vs-icl	up	no	linc	chr1:19854331-19854785:-
MSTRG.36870	fcl-vs-icl	down	no	linc	chr4:11850435-11857549:+
MSTRG.36983	fcl-vs-icl	up	no	linc	chr4:13019847-13021335:-
MSTRG.37016	fcl-vs-icl	up	no	linc	chr4:13346404-13353290:-
MSTRG.37105	fcl-vs-icl	down	no	linc	chr4:14043582-14045812:+
MSTRG.37170	fcl-vs-icl	down	no	linc	chr4:15488620-15492303:+
MSTRG.37171	fcl-vs-icl	down	no	antisense	chr4:15470639-15487685:+
MSTRG.37177	fcl-vs-icl	up	no	antisense	chr4:15515981-15519089:+
MSTRG.37423	fcl-vs-icl	down	no	linc	chr4:17440412-17442974:-
MSTRG.37440	fcl-vs-icl	down	no	linc	chr4:17535077-17536390:-
MSTRG.37486	fcl-vs-icl	down	no	linc	chr4:18053347-18053772:-
MSTRG.37492	fcl-vs-icl	down	no	linc	chr4:18138667-18139982:+
MSTRG.37568	fcl-vs-icl	up	no	linc	chr4:18711506-18712148:+
MSTRG.37749	fcl-vs-icl	up	no	linc	chr4:19610788-19611590:-
MSTRG.37951	fcl-vs-icl	down	no	linc	chr4:20503742-20504923:+
MSTRG.37956	fcl-vs-icl	up	no	linc	chr4:20509741-20511885:-
MSTRG.3801	fcl-vs-icl	down	no	antisense	chr1:20715040-20715502:-
MSTRG.38030	fcl-vs-icl	down	no	linc	chr4:20838361-20839289:-
MSTRG.38071	fcl-vs-icl	up	no	linc	chr4:21020870-21022361:+
MSTRG.3818	fcl-vs-icl	down	no	linc	chr1:20786066-20791766:-
MSTRG.38209	fcl-vs-icl	down	yes	linc	chr4:21715724-21716223:+
MSTRG.38325	fcl-vs-icl	down	no	linc	chr4:22262901-22263968:+
MSTRG.3835	fcl-vs-icl	down	no	linc	chr1:20898948-20900423:+
MSTRG.38670	fcl-vs-icl	up	no	linc	chr4:23593026-23593432:+
MSTRG.38728	fcl-vs-icl	down	no	linc	chr4:23755943-23758481:+
MSTRG.38766	fcl-vs-icl	up	no	linc	chr4:23918752-23919313:-
MSTRG.3890	fcl-vs-icl	up	no	linc	chr1:21164853-21165233:-
MSTRG.38988	fcl-vs-icl	up	no	linc	chr4:24718117-24718723:-
MSTRG.39012	fcl-vs-icl	down	no	antisense	chr4:24842134-24843656:+
MSTRG.39014	fcl-vs-icl	down	no	antisense	chr4:24854907-24856115:-
MSTRG.39068	fcl-vs-icl	down	no	linc	chr4:25020701-25021276:-
MSTRG.39126	fcl-vs-icl	down	no	linc	chr4:25270346-25271834:-
MSTRG.39225	fcl-vs-icl	down	no	antisense	chr4:25687719-25694041:-
MSTRG.39581	fcl-vs-icl	up	no	linc	chr4:27349892-27352014:+
MSTRG.39676	fcl-vs-icl	down	no	linc	chr4:27728122-27729716:-
MSTRG.3974	fcl-vs-icl	up	no	antisense	chr1:21703388-21707440:+
MSTRG.39771	fcl-vs-icl	up	no	linc	chr4:28174639-28175679:-
MSTRG.39945	fcl-vs-icl	up	no	linc	chr4:29199477-29199787:+
MSTRG.4007	fcl-vs-icl	down	no	linc	chr1:22011433-22012402:-
MSTRG.40086	fcl-vs-icl	down	no	antisense	chr4:29799871-29801670:-
MSTRG.40159	fcl-vs-icl	down	no	linc	chr4:30213718-30214375:-
MSTRG.4017	fcl-vs-icl	down	yes	linc	chr1:22031241-22033999:-
MSTRG.40455	fcl-vs-icl	down	no	antisense	chr4:31401042-31402140:+
MSTRG.4047	fcl-vs-icl	up	no	antisense	chr1:22325489-22325856:-
MSTRG.40512	fcl-vs-icl	down	no	linc	chr4:31519589-31519976:-
MSTRG.40542	fcl-vs-icl	down	no	linc	chr4:31645311-31645909:-
MSTRG.40593	fcl-vs-icl	up	no	linc	chr4:31813529-31814412:+
MSTRG.40635	fcl-vs-icl	down	no	antisense	chr4:31937633-31938738:+
MSTRG.40665	fcl-vs-icl	down	no	antisense	chr4:32023799-32024245:-
MSTRG.40902	fcl-vs-icl	down	no	antisense	chr4:32892890-32897155:-
MSTRG.41020	fcl-vs-icl	down	no	antisense	chr4:33385213-33388638:-
MSTRG.41241	fcl-vs-icl	up	no	linc	chr4:34312496-34313122:+
MSTRG.41323	fcl-vs-icl	up	no	linc	chr4:34588914-34589366:+
MSTRG.41731	fcl-vs-icl	down	no	linc	chr5:680200-680869:+
MSTRG.41749	fcl-vs-icl	down	no	linc	chr5:763321-763903:-
MSTRG.41828	fcl-vs-icl	down	no	linc	chr5:1026071-1027294:+
MSTRG.41854	fcl-vs-icl	up	no	linc	chr5:1160471-1171782:+
MSTRG.41989	fcl-vs-icl	up	no	linc	chr5:1875859-1876811:+
MSTRG.42006	fcl-vs-icl	down	no	linc	chr5:1962978-1963394:+
MSTRG.42028	fcl-vs-icl	down	no	linc	chr5:2059548-2060385:-
MSTRG.42139	fcl-vs-icl	up	no	antisense	chr5:2445487-2447232:+
MSTRG.42198	fcl-vs-icl	down	no	antisense	chr5:2676025-2676321:+
MSTRG.42230	fcl-vs-icl	down	no	antisense	chr5:2751678-2752408:+
MSTRG.42286	fcl-vs-icl	up	no	linc	chr5:2992318-2993052:+
MSTRG.42398	fcl-vs-icl	down	no	linc	chr5:3548055-3548490:+
MSTRG.4240	fcl-vs-icl	up	no	linc	chr1:23418053-23418698:-
MSTRG.42467	fcl-vs-icl	up	no	linc	chr5:3860490-3866596:+
MSTRG.42605	fcl-vs-icl	down	yes	linc	chr5:4801720-4803247:-
MSTRG.42698	fcl-vs-icl	down	no	linc	chr5:5633398-5634080:-
MSTRG.42870	fcl-vs-icl	up	no	linc	chr5:6951689-6952075:-
MSTRG.43027	fcl-vs-icl	down	no	linc	chr5:8195383-8195968:+
MSTRG.43199	fcl-vs-icl	up	no	linc	chr5:9941285-9946719:+
MSTRG.43240	fcl-vs-icl	up	no	linc	chr5:10676291-10678086:-
MSTRG.43391	fcl-vs-icl	up	no	linc	chr5:12250743-12253908:-
MSTRG.43504	fcl-vs-icl	down	no	linc	chr5:13489856-13493043:+
MSTRG.43598	fcl-vs-icl	up	no	linc	chr5:14130437-14130958:+
MSTRG.43618	fcl-vs-icl	down	no	linc	chr5:14321480-14322089:-
MSTRG.43621	fcl-vs-icl	down	no	linc	chr5:14367159-14369330:+
MSTRG.43868	fcl-vs-icl	down	no	antisense	chr5:16298303-16300264:+
MSTRG.43885	fcl-vs-icl	up	yes	linc	chr5:16442925-16445914:-
MSTRG.43987	fcl-vs-icl	up	no	linc	chr5:17118283-17121458:-
MSTRG.44032	fcl-vs-icl	down	no	antisense	chr5:17361228-17362097:+
MSTRG.44035	fcl-vs-icl	down	no	antisense	chr5:17365445-17366912:+
MSTRG.44169	fcl-vs-icl	up	no	linc	chr5:18293401-18294488:-
MSTRG.44170	fcl-vs-icl	down	yes	linc	chr5:18306820-18308213:-
MSTRG.44190	fcl-vs-icl	down	no	linc	chr5:18347250-18348404:+
MSTRG.44204	fcl-vs-icl	up	no	linc	chr5:18458784-18461052:+
MSTRG.44500	fcl-vs-icl	down	no	antisense	chr5:19893314-19898532:+
MSTRG.44527	fcl-vs-icl	up	no	linc	chr5:20032656-20033149:+
MSTRG.44827	fcl-vs-icl	down	no	antisense	chr5:21451319-21453880:-
MSTRG.44903	fcl-vs-icl	down	no	antisense	chr5:21756626-21758300:-
MSTRG.45271	fcl-vs-icl	down	no	linc	chr5:23629144-23629638:-
MSTRG.45286	fcl-vs-icl	up	no	linc	chr5:23633983-23635547:-
MSTRG.45324	fcl-vs-icl	up	no	antisense	chr5:23901542-23904732:+
MSTRG.45394	fcl-vs-icl	up	no	linc	chr5:24228398-24228847:-
MSTRG.45524	fcl-vs-icl	down	no	antisense	chr5:24679304-24679594:-
MSTRG.4596	fcl-vs-icl	down	no	linc	chr1:24989649-24994548:-
MSTRG.45991	fcl-vs-icl	up	no	linc	chr5:26699392-26699758:-
MSTRG.46070	fcl-vs-icl	up	no	antisense	chr5:27093644-27094007:-
MSTRG.46465	fcl-vs-icl	down	no	antisense	chr5:28665795-28666134:-
MSTRG.46491	fcl-vs-icl	down	no	linc	chr5:28807632-28808492:+
MSTRG.46596	fcl-vs-icl	up	no	linc	chr5:29187379-29189357:-
MSTRG.46614	fcl-vs-icl	down	no	linc	chr5:29263716-29265849:-
MSTRG.46625	fcl-vs-icl	up	no	antisense	chr5:29293390-29298148:+
MSTRG.46789	fcl-vs-icl	down	no	antisense	chr6:287703-289922:+
MSTRG.47013	fcl-vs-icl	up	no	linc	chr6:1175760-1177686:-
MSTRG.47014	fcl-vs-icl	down	no	linc	chr6:1211907-1212912:+
MSTRG.47031	fcl-vs-icl	down	no	antisense	chr6:1184332-1190608:+
MSTRG.47166	fcl-vs-icl	up	no	linc	chr6:1807427-1807766:-
MSTRG.47292	fcl-vs-icl	down	no	linc	chr6:2247269-2247766:+
MSTRG.477	fcl-vs-icl	up	no	linc	chr1:1920803-1927558:-
MSTRG.47755	fcl-vs-icl	down	no	linc	chr6:4067290-4068186:-
MSTRG.48354	fcl-vs-icl	down	no	linc	chr6:6917291-6921372:-
MSTRG.48391	fcl-vs-icl	up	no	antisense	chr6:7058461-7059492:+
MSTRG.48399	fcl-vs-icl	up	no	antisense	chr6:7078569-7079925:-
MSTRG.48430	fcl-vs-icl	down	no	antisense	chr6:7204747-7206708:-
MSTRG.48497	fcl-vs-icl	up	no	linc	chr6:7551494-7551932:+
MSTRG.48534	fcl-vs-icl	down	no	linc	chr6:7764984-7765830:-
MSTRG.48687	fcl-vs-icl	up	yes	linc	chr6:8927766-8930659:-
MSTRG.48772	fcl-vs-icl	up	no	linc	chr6:9551255-9551653:+
MSTRG.48776	fcl-vs-icl	up	no	antisense	chr6:9559667-9560008:-
MSTRG.49044	fcl-vs-icl	down	no	antisense	chr6:11452733-11453078:-
MSTRG.49064	fcl-vs-icl	up	no	antisense	chr6:11603927-11606532:+
MSTRG.49100	fcl-vs-icl	up	no	linc	chr6:11767391-11778170:+
MSTRG.49130	fcl-vs-icl	down	no	antisense	chr6:12134462-12136129:+
MSTRG.49150	fcl-vs-icl	up	no	linc	chr6:12268374-12270988:+
MSTRG.49381	fcl-vs-icl	up	no	antisense	chr6:13901329-13901729:+
MSTRG.49434	fcl-vs-icl	up	no	linc	chr6:14451562-14454300:+
MSTRG.49446	fcl-vs-icl	down	no	linc	chr6:14471787-14473361:+
MSTRG.49470	fcl-vs-icl	up	yes	linc	chr6:14667247-14671984:-
MSTRG.49514	fcl-vs-icl	down	no	linc	chr6:15165471-15166127:+
MSTRG.4954	fcl-vs-icl	down	no	antisense	chr1:27018532-27021614:+
MSTRG.49648	fcl-vs-icl	down	yes	linc	chr6:16056476-16057047:+
MSTRG.49965	fcl-vs-icl	up	no	antisense	chr6:19116674-19133794:-
MSTRG.50	fcl-vs-icl	down	no	antisense	chr1:134502-135211:-
MSTRG.50062	fcl-vs-icl	up	no	linc	chr6:19456580-19456895:+
MSTRG.50277	fcl-vs-icl	up	no	linc	chr6:21103677-21104780:-
MSTRG.50285	fcl-vs-icl	down	no	linc	chr6:21152710-21160614:-
MSTRG.50286	fcl-vs-icl	up	no	linc	chr6:21159050-21159406:-
MSTRG.50369	fcl-vs-icl	up	no	linc	chr6:21829009-21831001:+
MSTRG.50370	fcl-vs-icl	down	no	linc	chr6:21856674-21857882:-
MSTRG.50565	fcl-vs-icl	down	no	linc	chr6:23250407-23251166:+
MSTRG.50662	fcl-vs-icl	down	no	linc	chr6:23795570-23798451:+
MSTRG.5088	fcl-vs-icl	up	no	linc	chr1:27542229-27542640:+
MSTRG.51034	fcl-vs-icl	down	no	linc	chr6:25949709-25952909:+
MSTRG.51237	fcl-vs-icl	down	no	linc	chr6:26984186-26984922:-
MSTRG.51596	fcl-vs-icl	down	no	linc	chr6:28677271-28678483:+
MSTRG.51632	fcl-vs-icl	down	no	antisense	chr6:28805156-28806805:+
MSTRG.51766	fcl-vs-icl	down	no	linc	chr6:29413352-29413784:-
MSTRG.51827	fcl-vs-icl	down	no	antisense	chr6:29725373-29725685:-
MSTRG.5225	fcl-vs-icl	down	no	linc	chr1:28183032-28186656:-
MSTRG.52339	fcl-vs-icl	up	no	linc	chr7:772143-773740:+
MSTRG.52387	fcl-vs-icl	down	no	linc	chr7:1058769-1059802:-
MSTRG.52477	fcl-vs-icl	down	no	linc	chr7:1484826-1485160:-
MSTRG.52657	fcl-vs-icl	up	no	linc	chr7:2245193-2245686:+
MSTRG.52772	fcl-vs-icl	up	no	antisense	chr7:3128329-3128724:+
MSTRG.52798	fcl-vs-icl	up	no	linc	chr7:3214548-3215405:+
MSTRG.52799	fcl-vs-icl	up	no	linc	chr7:3218086-3218907:+
MSTRG.52878	fcl-vs-icl	down	no	antisense	chr7:3566532-3567128:+
MSTRG.52968	fcl-vs-icl	down	no	antisense	chr7:3919429-3920948:-
MSTRG.53080	fcl-vs-icl	up	no	antisense	chr7:4492689-4496093:-
MSTRG.53159	fcl-vs-icl	up	no	linc	chr7:5022621-5022948:-
MSTRG.53246	fcl-vs-icl	down	no	linc	chr7:5483599-5484362:+
MSTRG.53260	fcl-vs-icl	down	no	linc	chr7:5538324-5540673:-
MSTRG.53289	fcl-vs-icl	down	no	antisense	chr7:5667468-5668155:-
MSTRG.53555	fcl-vs-icl	up	no	linc	chr7:7813952-7814694:-
MSTRG.53593	fcl-vs-icl	down	no	linc	chr7:8205477-8206137:-
MSTRG.53631	fcl-vs-icl	down	no	linc	chr7:8610507-8613146:+
MSTRG.53660	fcl-vs-icl	up	yes	linc	chr7:8775597-8777526:+
MSTRG.53669	fcl-vs-icl	down	no	linc	chr7:8898333-8898841:-
MSTRG.53698	fcl-vs-icl	down	no	linc	chr7:9095393-9096972:-
MSTRG.53768	fcl-vs-icl	down	no	linc	chr7:10097143-10097866:+
MSTRG.53796	fcl-vs-icl	down	no	antisense	chr7:10421827-10429771:-
MSTRG.53957	fcl-vs-icl	up	no	linc	chr7:11667858-11669691:+
MSTRG.5414	fcl-vs-icl	down	no	antisense	chr1:28978066-28978352:-
MSTRG.54227	fcl-vs-icl	down	no	linc	chr7:14206526-14210540:-
MSTRG.54301	fcl-vs-icl	up	no	linc	chr7:14680650-14680958:-
MSTRG.54328	fcl-vs-icl	up	no	linc	chr7:14993490-14995980:-
MSTRG.54452	fcl-vs-icl	up	no	linc	chr7:15986565-15987180:+
MSTRG.54855	fcl-vs-icl	down	no	linc	chr7:18843748-18844270:+
MSTRG.54893	fcl-vs-icl	down	no	linc	chr7:19166545-19179140:+
MSTRG.55062	fcl-vs-icl	up	no	linc	chr7:20178100-20179053:-
MSTRG.55067	fcl-vs-icl	up	no	antisense	chr7:20324257-20325137:+
MSTRG.55958	fcl-vs-icl	down	no	linc	chr7:24663062-24663525:+
MSTRG.56074	fcl-vs-icl	up	no	linc	chr7:25213797-25214483:+
MSTRG.56169	fcl-vs-icl	down	no	antisense	chr7:25524532-25524932:-
MSTRG.56291	fcl-vs-icl	up	no	antisense	chr7:26017219-26019427:+
MSTRG.56377	fcl-vs-icl	down	no	linc	chr7:26399768-26401375:+
MSTRG.56471	fcl-vs-icl	up	no	antisense	chr7:27064981-27069014:-
MSTRG.56490	fcl-vs-icl	down	no	antisense	chr7:27135939-27136466:-
MSTRG.56508	fcl-vs-icl	up	no	linc	chr7:27228339-27228974:+
MSTRG.56513	fcl-vs-icl	down	no	linc	chr7:27259387-27265826:+
MSTRG.56523	fcl-vs-icl	down	no	linc	chr7:27458303-27459038:-
MSTRG.56524	fcl-vs-icl	down	no	linc	chr7:27459303-27462842:-
MSTRG.56637	fcl-vs-icl	down	no	antisense	chr7:27632625-27633547:-
MSTRG.56878	fcl-vs-icl	down	no	antisense	chr7:28650508-28651865:-
MSTRG.57038	fcl-vs-icl	down	no	antisense	chr7:29226213-29226713:-
MSTRG.57340	fcl-vs-icl	down	no	antisense	chr8:721691-722619:+
MSTRG.57364	fcl-vs-icl	down	no	linc	chr8:798322-798733:-
MSTRG.57538	fcl-vs-icl	down	no	linc	chr8:1779726-1780829:+
MSTRG.57539	fcl-vs-icl	down	no	linc	chr8:1807155-1809466:+
MSTRG.57598	fcl-vs-icl	up	no	antisense	chr8:2156480-2156774:-
MSTRG.57952	fcl-vs-icl	down	no	linc	chr8:4437928-4438287:-
MSTRG.58018	fcl-vs-icl	up	no	antisense	chr8:4950465-4953788:-
MSTRG.58059	fcl-vs-icl	up	no	linc	chr8:5282595-5282951:+
MSTRG.58068	fcl-vs-icl	down	no	antisense	chr8:5314699-5316043:-
MSTRG.58342	fcl-vs-icl	up	no	linc	chr8:7467671-7468923:+
MSTRG.58423	fcl-vs-icl	down	no	antisense	chr8:7980630-7988225:-
MSTRG.58425	fcl-vs-icl	down	no	linc	chr8:7986059-7988171:+
MSTRG.58479	fcl-vs-icl	up	no	linc	chr8:8070829-8071429:-
MSTRG.58480	fcl-vs-icl	up	no	linc	chr8:8104161-8104579:-
MSTRG.58614	fcl-vs-icl	down	no	linc	chr8:8967193-8967683:-
MSTRG.58615	fcl-vs-icl	up	no	linc	chr8:8972390-8977532:-
MSTRG.58793	fcl-vs-icl	up	no	linc	chr8:10460901-10461631:+
MSTRG.58839	fcl-vs-icl	up	no	antisense	chr8:10759619-10759960:-
MSTRG.58874	fcl-vs-icl	up	no	linc	chr8:11193462-11199903:-
MSTRG.58937	fcl-vs-icl	up	no	linc	chr8:11669703-11670164:+
MSTRG.58940	fcl-vs-icl	down	no	linc	chr8:11639833-11642867:+
MSTRG.59131	fcl-vs-icl	down	yes	linc	chr8:13631090-13632963:-
MSTRG.59167	fcl-vs-icl	down	no	antisense	chr8:13947886-13950338:-
MSTRG.59195	fcl-vs-icl	down	no	antisense	chr8:14230540-14241072:+
MSTRG.59251	fcl-vs-icl	down	yes	linc	chr8:14681070-14682696:-
MSTRG.59284	fcl-vs-icl	down	no	linc	chr8:14917988-14920159:-
MSTRG.59286	fcl-vs-icl	down	no	linc	chr8:14927113-14928078:+
MSTRG.59373	fcl-vs-icl	down	no	antisense	chr8:15723015-15734403:+
MSTRG.59396	fcl-vs-icl	up	yes	linc	chr8:16255168-16257091:-
MSTRG.59397	fcl-vs-icl	up	no	linc	chr8:16292794-16294905:-
MSTRG.59410	fcl-vs-icl	down	no	antisense	chr8:16373522-16374042:-
MSTRG.59462	fcl-vs-icl	up	no	linc	chr8:16916569-16917450:-
MSTRG.59656	fcl-vs-icl	down	no	linc	chr8:18420401-18421013:-
MSTRG.59710	fcl-vs-icl	down	no	linc	chr8:18755953-18756923:+
MSTRG.59720	fcl-vs-icl	up	no	antisense	chr8:18770275-18771451:+
MSTRG.59753	fcl-vs-icl	up	no	linc	chr8:19092082-19093360:+
MSTRG.59908	fcl-vs-icl	down	no	linc	chr8:20087537-20090580:-
MSTRG.59986	fcl-vs-icl	up	no	linc	chr8:20642098-20644334:+
MSTRG.60070	fcl-vs-icl	up	no	antisense	chr8:21020123-21021901:+
MSTRG.60078	fcl-vs-icl	down	no	linc	chr8:21096062-21097551:+
MSTRG.60167	fcl-vs-icl	down	no	linc	chr8:21648991-21649819:+
MSTRG.60204	fcl-vs-icl	down	no	linc	chr8:21903824-21904477:+
MSTRG.60234	fcl-vs-icl	down	no	antisense	chr8:22096835-22101125:-
MSTRG.60236	fcl-vs-icl	up	no	linc	chr8:22119198-22119590:+
MSTRG.60284	fcl-vs-icl	down	no	linc	chr8:22979238-22979865:-
MSTRG.604	fcl-vs-icl	down	no	linc	chr1:2459425-2462703:+
MSTRG.60549	fcl-vs-icl	down	no	linc	chr8:23886772-23889274:+
MSTRG.60776	fcl-vs-icl	up	no	antisense	chr8:24831652-24832066:+
MSTRG.60845	fcl-vs-icl	down	no	antisense	chr8:25037057-25037568:-
MSTRG.6089	fcl-vs-icl	up	no	linc	chr1:31845830-31846323:-
MSTRG.609	fcl-vs-icl	down	no	linc	chr1:2481153-2483773:+
MSTRG.6100	fcl-vs-icl	up	no	antisense	chr1:31836738-31837917:+
MSTRG.6107	fcl-vs-icl	up	no	linc	chr1:31898082-31898385:+
MSTRG.61161	fcl-vs-icl	down	no	antisense	chr8:26431673-26432816:+
MSTRG.61234	fcl-vs-icl	down	no	antisense	chr8:26753049-26754288:-
MSTRG.61364	fcl-vs-icl	up	no	linc	chr8:27264267-27266955:-
MSTRG.61394	fcl-vs-icl	up	no	antisense	chr8:27376423-27377108:+
MSTRG.61658	fcl-vs-icl	up	no	linc	chr8:28339236-28339563:+
MSTRG.61707	fcl-vs-icl	down	no	linc	chr9:324230-326152:+
MSTRG.61871	fcl-vs-icl	down	yes	linc	chr9:1436076-1438618:-
MSTRG.61881	fcl-vs-icl	down	no	linc	chr9:1514898-1519904:-
MSTRG.61889	fcl-vs-icl	down	no	linc	chr9:1610316-1610819:-
MSTRG.61931	fcl-vs-icl	down	no	linc	chr9:2028812-2035955:-
MSTRG.61983	fcl-vs-icl	down	no	linc	chr9:2482502-2483155:+
MSTRG.6203	fcl-vs-icl	down	no	linc	chr1:32283064-32283910:+
MSTRG.62237	fcl-vs-icl	down	no	linc	chr9:4674428-4675406:-
MSTRG.62249	fcl-vs-icl	up	no	linc	chr9:4863083-4864561:+
MSTRG.62348	fcl-vs-icl	down	no	linc	chr9:5681791-5682099:-
MSTRG.62427	fcl-vs-icl	down	no	linc	chr9:6373252-6373594:+
MSTRG.62498	fcl-vs-icl	down	no	linc	chr9:7256136-7258019:-
MSTRG.6250	fcl-vs-icl	up	yes	linc	chr1:32496471-32500858:-
MSTRG.62695	fcl-vs-icl	down	no	linc	chr9:9217088-9218120:-
MSTRG.6272	fcl-vs-icl	down	no	antisense	chr1:32547617-32548498:+
MSTRG.62833	fcl-vs-icl	down	no	linc	chr9:10361937-10362321:-
MSTRG.62846	fcl-vs-icl	down	no	linc	chr9:10474018-10476359:-
MSTRG.62914	fcl-vs-icl	up	yes	linc	chr9:11090580-11092527:-
MSTRG.63087	fcl-vs-icl	down	no	antisense	chr9:12386438-12387155:-
MSTRG.63092	fcl-vs-icl	up	no	linc	chr9:12402558-12403639:-
MSTRG.63188	fcl-vs-icl	down	no	linc	chr9:12974297-12975092:-
MSTRG.63231	fcl-vs-icl	up	no	linc	chr9:13416217-13418252:+
MSTRG.63275	fcl-vs-icl	up	no	linc	chr9:13616832-13620003:+
MSTRG.63408	fcl-vs-icl	up	no	linc	chr9:14534121-14534481:-
MSTRG.63505	fcl-vs-icl	down	no	antisense	chr9:15073247-15077626:+
MSTRG.63511	fcl-vs-icl	down	no	linc	chr9:15149450-15150417:+
MSTRG.63546	fcl-vs-icl	down	no	antisense	chr9:15332334-15333069:-
MSTRG.63602	fcl-vs-icl	up	no	antisense	chr9:15587045-15588988:+
MSTRG.64046	fcl-vs-icl	down	no	linc	chr9:17793121-17794531:-
MSTRG.64058	fcl-vs-icl	up	no	linc	chr9:17840623-17841083:+
MSTRG.64189	fcl-vs-icl	down	no	antisense	chr9:18431773-18432822:-
MSTRG.64370	fcl-vs-icl	up	no	antisense	chr9:19202742-19203792:-
MSTRG.64425	fcl-vs-icl	down	no	linc	chr9:19388903-19390085:+
MSTRG.64431	fcl-vs-icl	up	no	linc	chr9:19409955-19411799:-
MSTRG.64555	fcl-vs-icl	up	no	linc	chr9:19849996-19850609:-
MSTRG.64626	fcl-vs-icl	down	no	antisense	chr9:20083158-20085058:+
MSTRG.64704	fcl-vs-icl	up	no	antisense	chr9:20335536-20336815:+
MSTRG.64901	fcl-vs-icl	down	no	linc	chr9:21174688-21175186:+
MSTRG.65103	fcl-vs-icl	down	no	linc	chr9:22021301-22022704:+
MSTRG.65352	fcl-vs-icl	up	no	linc	chrAP008247:44063-44887:-
MSTRG.65369	fcl-vs-icl	up	no	linc	chrSyng_TIGR_021:1-2480:+
MSTRG.65385	fcl-vs-icl	down	no	linc	chrSyng_TIGR_045:4192-6449:-
MSTRG.6565	fcl-vs-icl	up	no	linc	chr1:33801880-33802215:-
MSTRG.7127	fcl-vs-icl	down	no	linc	chr1:36308179-36311080:-
MSTRG.7236	fcl-vs-icl	up	no	antisense	chr1:36769056-36769875:-
MSTRG.7374	fcl-vs-icl	up	no	antisense	chr1:37427717-37441214:+
MSTRG.7640	fcl-vs-icl	up	no	antisense	chr1:38449689-38450442:+
MSTRG.7641	fcl-vs-icl	down	no	linc	chr1:38463415-38464446:-
MSTRG.7805	fcl-vs-icl	down	no	antisense	chr1:39114201-39116104:+
MSTRG.7810	fcl-vs-icl	down	yes	antisense	chr1:39118147-39127408:-
MSTRG.7936	fcl-vs-icl	up	no	linc	chr1:39693403-39693949:-
MSTRG.8378	fcl-vs-icl	up	no	linc	chr1:41562199-41562667:+
MSTRG.8448	fcl-vs-icl	down	no	linc	chr1:41855504-41855895:-
MSTRG.8668	fcl-vs-icl	up	no	linc	chr1:42661472-42662402:+
MSTRG.8828	fcl-vs-icl	down	no	linc	chr10:162180-165522:-
MSTRG.8847	fcl-vs-icl	down	no	linc	chr10:213413-213837:+
MSTRG.8862	fcl-vs-icl	down	no	antisense	chr10:408744-410020:+
MSTRG.8929	fcl-vs-icl	down	no	linc	chr10:858816-861322:+
MSTRG.8955	fcl-vs-icl	down	no	linc	chr10:997595-997895:-
MSTRG.8986	fcl-vs-icl	down	no	linc	chr10:1200322-1203165:+
MSTRG.9229	fcl-vs-icl	up	no	antisense	chr10:3068493-3071116:+
MSTRG.9379	fcl-vs-icl	up	no	linc	chr10:4544029-4544569:+
MSTRG.9411	fcl-vs-icl	down	no	linc	chr10:4761420-4762054:+
MSTRG.9448	fcl-vs-icl	up	no	linc	chr10:5252595-5254662:+
MSTRG.9472	fcl-vs-icl	down	no	linc	chr10:5526594-5528607:+
MSTRG.9610	fcl-vs-icl	up	no	antisense	chr10:6738725-6739206:+
MSTRG.9616	fcl-vs-icl	down	no	linc	chr10:6744800-6745395:-
MSTRG.9621	fcl-vs-icl	up	no	linc	chr10:6864500-6866348:+
MSTRG.9638	fcl-vs-icl	down	no	linc	chr10:7048494-7049255:-
MSTRG.9662	fcl-vs-icl	down	no	linc	chr10:7250469-7252582:+
MSTRG.9722	fcl-vs-icl	up	no	linc	chr10:7745388-7746660:+
MSTRG.9752	fcl-vs-icl	down	no	linc	chr10:8042642-8044326:+
MSTRG.9792	fcl-vs-icl	down	no	antisense	chr10:8516201-8518664:-
MSTRG.9838	fcl-vs-icl	up	no	linc	chr10:8985334-8988828:-
MSTRG.9923	fcl-vs-icl	down	no	linc	chr10:9802949-9803430:-
MSTRG.9942	fcl-vs-icl	down	no	linc	chr10:9951571-9953091:-
MSTRG.9965	fcl-vs-icl	up	no	antisense	chr10:10079072-10083569:+
MSTRG.9992	fcl-vs-icl	down	no	linc	chr10:10305251-10311245:-
MSTRG.10611	ftl-vs-cot	down	no	antisense	chr2:16512599-16513261:-
MSTRG.10641	ftl-vs-cot	up	no	antisense	chr2:16610025-16610695:+
MSTRG.10736	ftl-vs-cot	up	yes	antisense	chr2:16971171-16971779:-
MSTRG.10886	ftl-vs-cot	up	no	antisense	chr2:17408992-17410224:-
MSTRG.10911	ftl-vs-cot	down	no	antisense	chr2:17495084-17495994:-
MSTRG.11010	ftl-vs-cot	down	no	antisense	chr2:17783929-17784910:-
MSTRG.11025	ftl-vs-cot	up	no	antisense	chr2:17836457-17838005:+
MSTRG.11112	ftl-vs-cot	down	yes	antisense	chr2:18072204-18073512:-
MSTRG.11159	ftl-vs-cot	down	yes	antisense	chr2:18186400-18190080:+
MSTRG.11213	ftl-vs-cot	down	no	antisense	chr2:18779479-18779899:+
MSTRG.11258	ftl-vs-cot	up	no	antisense	chr2:18873646-18874475:+
MSTRG.11277	ftl-vs-cot	up	no	antisense	chr2:18922687-18923142:-
MSTRG.11492	ftl-vs-cot	up	no	linc	chr2:19200665-19204009:+
MSTRG.11791	ftl-vs-cot	down	yes	antisense	chr3:396684-399740:+
MSTRG.11958	ftl-vs-cot	up	no	antisense	chr3:872204-873122:+
MSTRG.11995	ftl-vs-cot	down	no	linc	chr3:990050-991617:-
MSTRG.12312	ftl-vs-cot	down	no	antisense	chr3:1892975-1893944:+
MSTRG.12333	ftl-vs-cot	up	no	antisense	chr3:1966230-1967576:+
MSTRG.12387	ftl-vs-cot	down	no	linc	chr3:2139462-2139767:+
MSTRG.12572	ftl-vs-cot	down	yes	linc	chr3:2705306-2706501:+
MSTRG.12620	ftl-vs-cot	down	no	antisense	chr3:2858842-2859443:-
MSTRG.12943	ftl-vs-cot	down	yes	antisense	chr3:3867873-3869606:+
MSTRG.13110	ftl-vs-cot	up	no	antisense	chr3:4377154-4378125:-
MSTRG.13449	ftl-vs-cot	up	no	antisense	chr3:5458026-5458776:-
MSTRG.13562	ftl-vs-cot	up	no	antisense	chr3:5804463-5806290:+
MSTRG.1360	ftl-vs-cot	up	no	antisense	chr1:4379693-4380406:+
MSTRG.142	ftl-vs-cot	up	no	antisense	chr1:421493-422042:-
MSTRG.14282	ftl-vs-cot	up	no	antisense	chr3:8552071-8552795:+
MSTRG.1433	ftl-vs-cot	up	no	antisense	chr1:4660675-4663491:-
MSTRG.14506	ftl-vs-cot	down	yes	antisense	chr3:9441086-9444593:-
MSTRG.14538	ftl-vs-cot	up	no	antisense	chr3:9602087-9602644:-
MSTRG.14654	ftl-vs-cot	down	no	antisense	chr3:10024377-10024999:-
MSTRG.14746	ftl-vs-cot	up	no	linc	chr3:10399854-10401683:-
MSTRG.14774	ftl-vs-cot	up	no	linc	chr3:10487057-10487663:-
MSTRG.14827	ftl-vs-cot	down	no	linc	chr3:10918279-10918595:+
MSTRG.14833	ftl-vs-cot	up	no	linc	chr3:10962316-10963830:-
MSTRG.14834	ftl-vs-cot	up	no	linc	chr3:10965263-10967447:-
MSTRG.14862	ftl-vs-cot	up	yes	linc	chr3:11109633-11110654:-
MSTRG.14880	ftl-vs-cot	up	no	antisense	chr3:11191607-11191911:-
MSTRG.14957	ftl-vs-cot	up	no	linc	chr3:12360761-12364219:+
MSTRG.14959	ftl-vs-cot	up	yes	linc	chr3:12559307-12560054:-
MSTRG.14972	ftl-vs-cot	down	yes	linc	chr3:12971303-12978445:+
MSTRG.14996	ftl-vs-cot	up	no	linc	chr3:14238997-14240863:+
MSTRG.15014	ftl-vs-cot	up	no	antisense	chr3:14789687-14791332:-
MSTRG.15030	ftl-vs-cot	up	no	linc	chr3:14917043-14918946:+
MSTRG.15141	ftl-vs-cot	up	no	linc	chr3:16277644-16278822:+
MSTRG.15223	ftl-vs-cot	up	no	linc	chr3:16676367-16676783:+
MSTRG.15318	ftl-vs-cot	up	no	linc	chr3:17174120-17174867:-
MSTRG.15525	ftl-vs-cot	down	no	antisense	chr3:17941236-17941633:-
MSTRG.15571	ftl-vs-cot	down	no	antisense	chr3:18091075-18092409:-
MSTRG.16049	ftl-vs-cot	up	no	antisense	chr3:19706979-19707478:-
MSTRG.16390	ftl-vs-cot	down	yes	antisense	chr3:20827768-20829255:-
MSTRG.16600	ftl-vs-cot	up	no	antisense	chr3:21505890-21507068:+
MSTRG.16747	ftl-vs-cot	up	no	antisense	chr3:22018203-22018687:-
MSTRG.17442	ftl-vs-cot	down	no	linc	chr4:862859-865551:-
MSTRG.17574	ftl-vs-cot	up	no	antisense	chr4:1387995-1388535:+
MSTRG.17639	ftl-vs-cot	up	no	linc	chr4:1779878-1782889:+
MSTRG.17646	ftl-vs-cot	up	no	linc	chr4:1875681-1876502:-
MSTRG.17692	ftl-vs-cot	up	no	linc	chr4:2375546-2376349:-
MSTRG.17709	ftl-vs-cot	up	no	linc	chr4:2458706-2459264:-
MSTRG.17921	ftl-vs-cot	up	no	antisense	chr4:5769350-5771987:-
MSTRG.1799	ftl-vs-cot	up	no	antisense	chr1:5708524-5709520:-
MSTRG.18010	ftl-vs-cot	up	no	antisense	chr4:6313900-6316386:-
MSTRG.18094	ftl-vs-cot	up	no	antisense	chr4:6776654-6777722:-
MSTRG.18255	ftl-vs-cot	up	no	antisense	chr4:7478247-7479008:-
MSTRG.18281	ftl-vs-cot	up	no	antisense	chr4:7586273-7587142:+
MSTRG.18425	ftl-vs-cot	up	yes	linc	chr4:8157013-8157995:+
MSTRG.18514	ftl-vs-cot	down	no	antisense	chr4:8460659-8461931:-
MSTRG.18691	ftl-vs-cot	up	no	antisense	chr4:9249363-9249680:+
MSTRG.18762	ftl-vs-cot	down	yes	linc	chr4:9497451-9498543:+
MSTRG.18833	ftl-vs-cot	down	no	antisense	chr4:9745140-9745688:+
MSTRG.19317	ftl-vs-cot	down	no	linc	chr4:11876174-11877715:-
MSTRG.1946	ftl-vs-cot	down	no	antisense	chr1:6184784-6185730:-
MSTRG.19500	ftl-vs-cot	down	no	antisense	chr4:12546175-12546707:-
MSTRG.19794	ftl-vs-cot	down	yes	antisense	chr4:13422162-13423683:-
MSTRG.19801	ftl-vs-cot	up	no	antisense	chr4:13453724-13454553:-
MSTRG.20221	ftl-vs-cot	up	no	linc	chr4:14917176-14917613:-
MSTRG.20518	ftl-vs-cot	down	no	antisense	chr4:15974290-15974971:+
MSTRG.20561	ftl-vs-cot	down	no	antisense	chr4:16137113-16137428:-
MSTRG.20649	ftl-vs-cot	up	no	antisense	chr4:16351416-16354168:-
MSTRG.20896	ftl-vs-cot	down	no	antisense	chr4:17165404-17165957:+
MSTRG.21010	ftl-vs-cot	down	no	antisense	chr4:17539467-17540530:-
MSTRG.21081	ftl-vs-cot	down	yes	linc	chr4:17789046-17789480:-
MSTRG.21172	ftl-vs-cot	up	no	antisense	chr4:18074382-18074956:+
MSTRG.21176	ftl-vs-cot	down	no	antisense	chr4:18078104-18078586:+
MSTRG.21192	ftl-vs-cot	down	no	antisense	chr4:18127306-18128532:-
MSTRG.21325	ftl-vs-cot	down	no	antisense	chr4:18571586-18572570:+
MSTRG.21358	ftl-vs-cot	down	no	antisense	chr5:27131-27705:+
MSTRG.21706	ftl-vs-cot	up	no	antisense	chr5:1038487-1039460:+
MSTRG.21794	ftl-vs-cot	up	no	antisense	chr5:1341657-1343934:-
MSTRG.21826	ftl-vs-cot	up	no	linc	chr5:1420645-1422648:-
MSTRG.21931	ftl-vs-cot	up	no	antisense	chr5:1759552-1760258:+
MSTRG.22367	ftl-vs-cot	down	no	antisense	chr5:3183010-3183446:+
MSTRG.22614	ftl-vs-cot	up	no	antisense	chr5:4002104-4003095:+
MSTRG.22866	ftl-vs-cot	down	no	antisense	chr5:4756095-4756702:-
MSTRG.22878	ftl-vs-cot	up	no	linc	chr5:4799227-4800718:-
MSTRG.22902	ftl-vs-cot	up	no	antisense	chr5:4885956-4886910:-
MSTRG.23422	ftl-vs-cot	down	yes	antisense	chr5:6663701-6664438:-
MSTRG.2376	ftl-vs-cot	down	no	linc	chr1:6718595-6721836:+
MSTRG.23825	ftl-vs-cot	down	no	antisense	chr5:8187819-8188361:-
MSTRG.23829	ftl-vs-cot	down	yes	antisense	chr5:8217749-8218201:-
MSTRG.24180	ftl-vs-cot	up	no	antisense	chr5:9986546-9988061:-
MSTRG.24247	ftl-vs-cot	down	no	linc	chr5:10937564-10938189:-
MSTRG.24350	ftl-vs-cot	down	no	antisense	chr5:13855818-13856707:-
MSTRG.24391	ftl-vs-cot	up	no	antisense	chr5:14197953-14198844:+
MSTRG.24501	ftl-vs-cot	up	no	antisense	chr5:15027054-15027987:+
MSTRG.24674	ftl-vs-cot	up	no	antisense	chr5:16047283-16048088:-
MSTRG.24727	ftl-vs-cot	up	no	antisense	chr5:16242527-16242951:-
MSTRG.24925	ftl-vs-cot	up	no	antisense	chr5:16991004-16992209:+
MSTRG.24947	ftl-vs-cot	up	no	antisense	chr5:17142880-17144854:+
MSTRG.25	ftl-vs-cot	up	no	antisense	chr1:77785-80886:+
MSTRG.25174	ftl-vs-cot	up	yes	antisense	chr5:18068840-18069347:-
MSTRG.25199	ftl-vs-cot	down	no	antisense	chr5:18192474-18193449:+
MSTRG.25211	ftl-vs-cot	up	no	antisense	chr5:18260947-18261586:-
MSTRG.25463	ftl-vs-cot	up	no	antisense	chr5:19276544-19276957:-
MSTRG.25471	ftl-vs-cot	down	no	antisense	chr5:19294850-19298064:+
MSTRG.25627	ftl-vs-cot	up	no	antisense	chr5:19852738-19853472:-
MSTRG.26264	ftl-vs-cot	up	no	antisense	chr5:22448731-22449204:+
MSTRG.26590	ftl-vs-cot	up	no	antisense	chr5:23636241-23637195:-
MSTRG.2677	ftl-vs-cot	up	yes	antisense	chr1:8798329-8800558:+
MSTRG.26934	ftl-vs-cot	down	no	antisense	chr5:24764921-24765387:+
MSTRG.2707	ftl-vs-cot	down	no	antisense	chr1:9030371-9032261:+
MSTRG.27363	ftl-vs-cot	up	no	linc	chr5:26117881-26118412:-
MSTRG.27373	ftl-vs-cot	up	no	linc	chr5:26146491-26147720:-
MSTRG.27431	ftl-vs-cot	down	no	linc	chr5:26336729-26337269:-
MSTRG.27617	ftl-vs-cot	up	no	antisense	chr5:26848597-26849098:+
MSTRG.2950	ftl-vs-cot	up	no	antisense	chr1:10053818-10054263:+
MSTRG.3195	ftl-vs-cot	up	no	linc	chr1:10966989-10968845:+
MSTRG.3292	ftl-vs-cot	up	yes	linc	chr1:11453558-11455808:+
MSTRG.3334	ftl-vs-cot	up	no	linc	chr1:11584661-11585334:-
MSTRG.3492	ftl-vs-cot	down	no	antisense	chr1:12381973-12382515:-
MSTRG.3498	ftl-vs-cot	down	no	antisense	chr1:12384684-12385787:-
MSTRG.3601	ftl-vs-cot	down	no	linc	chr1:13145600-13147056:+
MSTRG.3678	ftl-vs-cot	up	yes	linc	chr1:16115480-16116087:-
MSTRG.3881	ftl-vs-cot	up	no	linc	chr1:17581990-17584959:+
MSTRG.3882	ftl-vs-cot	up	no	linc	chr1:17585190-17586891:+
MSTRG.4357	ftl-vs-cot	down	no	antisense	chr1:19640636-19641490:-
MSTRG.478	ftl-vs-cot	up	no	linc	chr1:1480116-1480808:-
MSTRG.4883	ftl-vs-cot	up	no	antisense	chr1:21888135-21888473:-
MSTRG.5093	ftl-vs-cot	down	yes	antisense	chr1:22767633-22768294:-
MSTRG.5153	ftl-vs-cot	up	yes	antisense	chr1:23031349-23033278:+
MSTRG.5198	ftl-vs-cot	up	no	antisense	chr1:23213448-23217126:+
MSTRG.5261	ftl-vs-cot	down	no	antisense	chr1:23455826-23457476:+
MSTRG.5305	ftl-vs-cot	down	yes	linc	chr1:23649553-23650216:-
MSTRG.5575	ftl-vs-cot	down	no	linc	chr1:24688936-24689347:+
MSTRG.5715	ftl-vs-cot	down	yes	antisense	chr1:25376620-25379215:+
MSTRG.5758	ftl-vs-cot	up	no	antisense	chr1:25481126-25481577:+
MSTRG.5781	ftl-vs-cot	down	no	antisense	chr1:25557348-25558420:-
MSTRG.630	ftl-vs-cot	down	no	linc	chr1:1942653-1944929:-
MSTRG.6418	ftl-vs-cot	up	no	antisense	chr1:27800120-27800484:+
MSTRG.6621	ftl-vs-cot	up	no	antisense	chr1:28421587-28422698:+
MSTRG.6740	ftl-vs-cot	down	no	antisense	chr1:28784645-28785459:+
MSTRG.6792	ftl-vs-cot	down	yes	antisense	chr1:28934752-28937187:-
MSTRG.6908	ftl-vs-cot	down	yes	antisense	chr1:29327655-29333161:-
MSTRG.7042	ftl-vs-cot	down	no	linc	chr1:29804356-29809543:-
MSTRG.7108	ftl-vs-cot	up	no	antisense	chr1:29957636-29958528:+
MSTRG.7176	ftl-vs-cot	down	no	antisense	chr1:30216130-30216593:-
MSTRG.73	ftl-vs-cot	down	no	antisense	chr1:219668-220374:-
MSTRG.7380	ftl-vs-cot	up	no	linc	chr2:635601-636184:+
MSTRG.7539	ftl-vs-cot	down	no	linc	chr2:1382323-1383500:-
MSTRG.7671	ftl-vs-cot	down	yes	linc	chr2:2295015-2296440:+
MSTRG.7706	ftl-vs-cot	up	no	linc	chr2:2945899-2946319:+
MSTRG.7998	ftl-vs-cot	up	no	antisense	chr2:6503166-6503571:+
MSTRG.8042	ftl-vs-cot	down	no	antisense	chr2:6797395-6798319:-
MSTRG.8079	ftl-vs-cot	down	no	linc	chr2:7005699-7008239:+
MSTRG.8459	ftl-vs-cot	down	no	linc	chr2:8353228-8356073:+
MSTRG.8650	ftl-vs-cot	up	yes	antisense	chr2:9256925-9258509:-
MSTRG.8762	ftl-vs-cot	down	yes	linc	chr2:9653121-9654974:+
MSTRG.8770	ftl-vs-cot	down	no	linc	chr2:9713587-9714344:-
MSTRG.8853	ftl-vs-cot	down	yes	linc	chr2:10064186-10065622:+
MSTRG.8978	ftl-vs-cot	down	no	antisense	chr2:10653577-10655094:+
MSTRG.9095	ftl-vs-cot	up	no	antisense	chr2:11147890-11149404:+
MSTRG.9305	ftl-vs-cot	up	no	antisense	chr2:11961005-11961937:+
MSTRG.9356	ftl-vs-cot	down	no	antisense	chr2:12172939-12174063:+
MSTRG.944	ftl-vs-cot	up	no	antisense	chr1:2956570-2957190:+
MSTRG.9688	ftl-vs-cot	down	no	antisense	chr2:13489250-13489629:+
MSTRG.9768	ftl-vs-cot	up	no	antisense	chr2:13730246-13731280:-
MSTRG.10611	stl-vs-ftl	up	no	antisense	chr2:16512599-16513261:-
MSTRG.10641	stl-vs-ftl	up	no	antisense	chr2:16610025-16610695:+
MSTRG.10736	stl-vs-ftl	down	no	antisense	chr2:16971171-16971779:-
MSTRG.10886	stl-vs-ftl	up	no	antisense	chr2:17408992-17410224:-
MSTRG.10911	stl-vs-ftl	up	no	antisense	chr2:17495084-17495994:-
MSTRG.11010	stl-vs-ftl	up	yes	antisense	chr2:17783929-17784910:-
MSTRG.11025	stl-vs-ftl	up	no	antisense	chr2:17836457-17838005:+
MSTRG.11112	stl-vs-ftl	up	yes	antisense	chr2:18072204-18073512:-
MSTRG.11159	stl-vs-ftl	down	no	antisense	chr2:18186400-18190080:+
MSTRG.11213	stl-vs-ftl	up	no	antisense	chr2:18779479-18779899:+
MSTRG.11258	stl-vs-ftl	up	no	antisense	chr2:18873646-18874475:+
MSTRG.11277	stl-vs-ftl	down	no	antisense	chr2:18922687-18923142:-
MSTRG.11492	stl-vs-ftl	down	no	linc	chr2:19200665-19204009:+
MSTRG.11791	stl-vs-ftl	up	no	antisense	chr3:396684-399740:+
MSTRG.11958	stl-vs-ftl	up	no	antisense	chr3:872204-873122:+
MSTRG.11995	stl-vs-ftl	up	no	linc	chr3:990050-991617:-
MSTRG.12312	stl-vs-ftl	up	no	antisense	chr3:1892975-1893944:+
MSTRG.12333	stl-vs-ftl	up	no	antisense	chr3:1966230-1967576:+
MSTRG.12387	stl-vs-ftl	down	no	linc	chr3:2139462-2139767:+
MSTRG.12572	stl-vs-ftl	up	no	linc	chr3:2705306-2706501:+
MSTRG.12620	stl-vs-ftl	up	no	antisense	chr3:2858842-2859443:-
MSTRG.12943	stl-vs-ftl	up	yes	antisense	chr3:3867873-3869606:+
MSTRG.13110	stl-vs-ftl	up	no	antisense	chr3:4377154-4378125:-
MSTRG.13449	stl-vs-ftl	down	no	antisense	chr3:5458026-5458776:-
MSTRG.13562	stl-vs-ftl	up	yes	antisense	chr3:5804463-5806290:+
MSTRG.1360	stl-vs-ftl	up	no	antisense	chr1:4379693-4380406:+
MSTRG.142	stl-vs-ftl	up	no	antisense	chr1:421493-422042:-
MSTRG.14282	stl-vs-ftl	up	no	antisense	chr3:8552071-8552795:+
MSTRG.1433	stl-vs-ftl	down	no	antisense	chr1:4660675-4663491:-
MSTRG.14506	stl-vs-ftl	up	no	antisense	chr3:9441086-9444593:-
MSTRG.14538	stl-vs-ftl	up	no	antisense	chr3:9602087-9602644:-
MSTRG.14651	stl-vs-ftl	up	no	antisense	chr3:10030768-10034206:-
MSTRG.14654	stl-vs-ftl	up	no	antisense	chr3:10024377-10024999:-
MSTRG.14746	stl-vs-ftl	up	no	linc	chr3:10399854-10401683:-
MSTRG.14774	stl-vs-ftl	up	yes	linc	chr3:10487057-10487663:-
MSTRG.14827	stl-vs-ftl	down	no	linc	chr3:10918279-10918595:+
MSTRG.14833	stl-vs-ftl	up	yes	linc	chr3:10962316-10963830:-
MSTRG.14834	stl-vs-ftl	up	yes	linc	chr3:10965263-10967447:-
MSTRG.14862	stl-vs-ftl	up	no	linc	chr3:11109633-11110654:-
MSTRG.14880	stl-vs-ftl	up	no	antisense	chr3:11191607-11191911:-
MSTRG.14957	stl-vs-ftl	down	no	linc	chr3:12360761-12364219:+
MSTRG.14959	stl-vs-ftl	down	no	linc	chr3:12559307-12560054:-
MSTRG.14972	stl-vs-ftl	down	yes	linc	chr3:12971303-12978445:+
MSTRG.14996	stl-vs-ftl	up	no	linc	chr3:14238997-14240863:+
MSTRG.15014	stl-vs-ftl	down	no	antisense	chr3:14789687-14791332:-
MSTRG.15030	stl-vs-ftl	down	yes	linc	chr3:14917043-14918946:+
MSTRG.15076	stl-vs-ftl	up	no	linc	chr3:15798646-15798979:+
MSTRG.15141	stl-vs-ftl	down	no	linc	chr3:16277644-16278822:+
MSTRG.15223	stl-vs-ftl	up	no	linc	chr3:16676367-16676783:+
MSTRG.15318	stl-vs-ftl	up	no	linc	chr3:17174120-17174867:-
MSTRG.15525	stl-vs-ftl	up	no	antisense	chr3:17941236-17941633:-
MSTRG.15571	stl-vs-ftl	down	no	antisense	chr3:18091075-18092409:-
MSTRG.16049	stl-vs-ftl	down	no	antisense	chr3:19706979-19707478:-
MSTRG.16390	stl-vs-ftl	up	no	antisense	chr3:20827768-20829255:-
MSTRG.16440	stl-vs-ftl	up	no	antisense	chr3:21007402-21008053:+
MSTRG.16600	stl-vs-ftl	up	no	antisense	chr3:21505890-21507068:+
MSTRG.16747	stl-vs-ftl	down	no	antisense	chr3:22018203-22018687:-
MSTRG.17442	stl-vs-ftl	down	no	linc	chr4:862859-865551:-
MSTRG.17574	stl-vs-ftl	down	yes	antisense	chr4:1387995-1388535:+
MSTRG.17639	stl-vs-ftl	up	no	linc	chr4:1779878-1782889:+
MSTRG.17646	stl-vs-ftl	down	no	linc	chr4:1875681-1876502:-
MSTRG.17692	stl-vs-ftl	up	no	linc	chr4:2375546-2376349:-
MSTRG.17709	stl-vs-ftl	down	no	linc	chr4:2458706-2459264:-
MSTRG.17795	stl-vs-ftl	up	no	linc	chr4:3953432-3956016:-
MSTRG.17921	stl-vs-ftl	up	no	antisense	chr4:5769350-5771987:-
MSTRG.1799	stl-vs-ftl	down	no	antisense	chr1:5708524-5709520:-
MSTRG.18010	stl-vs-ftl	down	no	antisense	chr4:6313900-6316386:-
MSTRG.18094	stl-vs-ftl	down	no	antisense	chr4:6776654-6777722:-
MSTRG.18255	stl-vs-ftl	down	yes	antisense	chr4:7478247-7479008:-
MSTRG.18281	stl-vs-ftl	down	yes	antisense	chr4:7586273-7587142:+
MSTRG.18425	stl-vs-ftl	up	no	linc	chr4:8157013-8157995:+
MSTRG.18514	stl-vs-ftl	up	no	antisense	chr4:8460659-8461931:-
MSTRG.18691	stl-vs-ftl	down	no	antisense	chr4:9249363-9249680:+
MSTRG.18762	stl-vs-ftl	up	no	linc	chr4:9497451-9498543:+
MSTRG.18833	stl-vs-ftl	up	yes	antisense	chr4:9745140-9745688:+
MSTRG.19317	stl-vs-ftl	up	no	linc	chr4:11876174-11877715:-
MSTRG.1946	stl-vs-ftl	down	no	antisense	chr1:6184784-6185730:-
MSTRG.19500	stl-vs-ftl	up	no	antisense	chr4:12546175-12546707:-
MSTRG.19794	stl-vs-ftl	up	no	antisense	chr4:13422162-13423683:-
MSTRG.19801	stl-vs-ftl	down	no	antisense	chr4:13453724-13454553:-
MSTRG.20221	stl-vs-ftl	down	no	linc	chr4:14917176-14917613:-
MSTRG.20364	stl-vs-ftl	up	no	antisense	chr4:15370003-15370406:+
MSTRG.20518	stl-vs-ftl	down	yes	antisense	chr4:15974290-15974971:+
MSTRG.20561	stl-vs-ftl	up	no	antisense	chr4:16137113-16137428:-
MSTRG.20649	stl-vs-ftl	down	yes	antisense	chr4:16351416-16354168:-
MSTRG.20896	stl-vs-ftl	down	no	antisense	chr4:17165404-17165957:+
MSTRG.21010	stl-vs-ftl	up	yes	antisense	chr4:17539467-17540530:-
MSTRG.21172	stl-vs-ftl	down	no	antisense	chr4:18074382-18074956:+
MSTRG.21176	stl-vs-ftl	up	no	antisense	chr4:18078104-18078586:+
MSTRG.21192	stl-vs-ftl	down	no	antisense	chr4:18127306-18128532:-
MSTRG.21325	stl-vs-ftl	down	no	antisense	chr4:18571586-18572570:+
MSTRG.21358	stl-vs-ftl	down	yes	antisense	chr5:27131-27705:+
MSTRG.21706	stl-vs-ftl	up	yes	antisense	chr5:1038487-1039460:+
MSTRG.21794	stl-vs-ftl	down	no	antisense	chr5:1341657-1343934:-
MSTRG.21826	stl-vs-ftl	down	no	linc	chr5:1420645-1422648:-
MSTRG.21931	stl-vs-ftl	up	no	antisense	chr5:1759552-1760258:+
MSTRG.22367	stl-vs-ftl	down	no	antisense	chr5:3183010-3183446:+
MSTRG.22614	stl-vs-ftl	down	no	antisense	chr5:4002104-4003095:+
MSTRG.22866	stl-vs-ftl	down	no	antisense	chr5:4756095-4756702:-
MSTRG.22878	stl-vs-ftl	down	no	linc	chr5:4799227-4800718:-
MSTRG.22902	stl-vs-ftl	down	no	antisense	chr5:4885956-4886910:-
MSTRG.23422	stl-vs-ftl	up	no	antisense	chr5:6663701-6664438:-
MSTRG.2376	stl-vs-ftl	up	no	linc	chr1:6718595-6721836:+
MSTRG.23825	stl-vs-ftl	down	no	antisense	chr5:8187819-8188361:-
MSTRG.23829	stl-vs-ftl	down	no	antisense	chr5:8217749-8218201:-
MSTRG.24180	stl-vs-ftl	down	yes	antisense	chr5:9986546-9988061:-
MSTRG.24247	stl-vs-ftl	up	no	linc	chr5:10937564-10938189:-
MSTRG.24350	stl-vs-ftl	down	no	antisense	chr5:13855818-13856707:-
MSTRG.24391	stl-vs-ftl	up	no	antisense	chr5:14197953-14198844:+
MSTRG.24501	stl-vs-ftl	up	yes	antisense	chr5:15027054-15027987:+
MSTRG.24674	stl-vs-ftl	up	no	antisense	chr5:16047283-16048088:-
MSTRG.24727	stl-vs-ftl	down	no	antisense	chr5:16242527-16242951:-
MSTRG.24925	stl-vs-ftl	down	no	antisense	chr5:16991004-16992209:+
MSTRG.24947	stl-vs-ftl	up	no	antisense	chr5:17142880-17144854:+
MSTRG.25	stl-vs-ftl	up	no	antisense	chr1:77785-80886:+
MSTRG.25174	stl-vs-ftl	down	no	antisense	chr5:18068840-18069347:-
MSTRG.25199	stl-vs-ftl	down	yes	antisense	chr5:18192474-18193449:+
MSTRG.25211	stl-vs-ftl	down	no	antisense	chr5:18260947-18261586:-
MSTRG.25463	stl-vs-ftl	down	no	antisense	chr5:19276544-19276957:-
MSTRG.25471	stl-vs-ftl	up	no	antisense	chr5:19294850-19298064:+
MSTRG.25627	stl-vs-ftl	down	no	antisense	chr5:19852738-19853472:-
MSTRG.26264	stl-vs-ftl	down	no	antisense	chr5:22448731-22449204:+
MSTRG.26590	stl-vs-ftl	down	no	antisense	chr5:23636241-23637195:-
MSTRG.2677	stl-vs-ftl	down	no	antisense	chr1:8798329-8800558:+
MSTRG.26934	stl-vs-ftl	down	no	antisense	chr5:24764921-24765387:+
MSTRG.2707	stl-vs-ftl	up	yes	antisense	chr1:9030371-9032261:+
MSTRG.27363	stl-vs-ftl	down	no	linc	chr5:26117881-26118412:-
MSTRG.27373	stl-vs-ftl	up	no	linc	chr5:26146491-26147720:-
MSTRG.27431	stl-vs-ftl	up	no	linc	chr5:26336729-26337269:-
MSTRG.27617	stl-vs-ftl	up	no	antisense	chr5:26848597-26849098:+
MSTRG.2950	stl-vs-ftl	up	no	antisense	chr1:10053818-10054263:+
MSTRG.3195	stl-vs-ftl	down	no	linc	chr1:10966989-10968845:+
MSTRG.3292	stl-vs-ftl	up	no	linc	chr1:11453558-11455808:+
MSTRG.3334	stl-vs-ftl	up	no	linc	chr1:11584661-11585334:-
MSTRG.3492	stl-vs-ftl	up	no	antisense	chr1:12381973-12382515:-
MSTRG.3498	stl-vs-ftl	up	no	antisense	chr1:12384684-12385787:-
MSTRG.3601	stl-vs-ftl	up	yes	linc	chr1:13145600-13147056:+
MSTRG.3678	stl-vs-ftl	down	yes	linc	chr1:16115480-16116087:-
MSTRG.3881	stl-vs-ftl	up	no	linc	chr1:17581990-17584959:+
MSTRG.3882	stl-vs-ftl	up	no	linc	chr1:17585190-17586891:+
MSTRG.4357	stl-vs-ftl	up	no	antisense	chr1:19640636-19641490:-
MSTRG.478	stl-vs-ftl	down	no	linc	chr1:1480116-1480808:-
MSTRG.4883	stl-vs-ftl	up	no	antisense	chr1:21888135-21888473:-
MSTRG.5093	stl-vs-ftl	up	no	antisense	chr1:22767633-22768294:-
MSTRG.5153	stl-vs-ftl	down	yes	antisense	chr1:23031349-23033278:+
MSTRG.5198	stl-vs-ftl	up	no	antisense	chr1:23213448-23217126:+
MSTRG.5261	stl-vs-ftl	down	no	antisense	chr1:23455826-23457476:+
MSTRG.5305	stl-vs-ftl	down	no	linc	chr1:23649553-23650216:-
MSTRG.5575	stl-vs-ftl	down	no	linc	chr1:24688936-24689347:+
MSTRG.5715	stl-vs-ftl	down	no	antisense	chr1:25376620-25379215:+
MSTRG.5758	stl-vs-ftl	down	no	antisense	chr1:25481126-25481577:+
MSTRG.5781	stl-vs-ftl	up	no	antisense	chr1:25557348-25558420:-
MSTRG.5853	stl-vs-ftl	up	no	linc	chr1:25845372-25845801:+
MSTRG.630	stl-vs-ftl	up	no	linc	chr1:1942653-1944929:-
MSTRG.6418	stl-vs-ftl	up	no	antisense	chr1:27800120-27800484:+
MSTRG.6621	stl-vs-ftl	up	no	antisense	chr1:28421587-28422698:+
MSTRG.6740	stl-vs-ftl	up	no	antisense	chr1:28784645-28785459:+
MSTRG.6792	stl-vs-ftl	up	no	antisense	chr1:28934752-28937187:-
MSTRG.6908	stl-vs-ftl	up	yes	antisense	chr1:29327655-29333161:-
MSTRG.7042	stl-vs-ftl	down	no	linc	chr1:29804356-29809543:-
MSTRG.7108	stl-vs-ftl	up	no	antisense	chr1:29957636-29958528:+
MSTRG.7176	stl-vs-ftl	up	no	antisense	chr1:30216130-30216593:-
MSTRG.73	stl-vs-ftl	down	no	antisense	chr1:219668-220374:-
MSTRG.7380	stl-vs-ftl	down	no	linc	chr2:635601-636184:+
MSTRG.7539	stl-vs-ftl	up	no	linc	chr2:1382323-1383500:-
MSTRG.7671	stl-vs-ftl	down	no	linc	chr2:2295015-2296440:+
MSTRG.7706	stl-vs-ftl	down	no	linc	chr2:2945899-2946319:+
MSTRG.78	stl-vs-ftl	up	no	antisense	chr1:246727-247209:+
MSTRG.7998	stl-vs-ftl	down	no	antisense	chr2:6503166-6503571:+
MSTRG.8042	stl-vs-ftl	down	no	antisense	chr2:6797395-6798319:-
MSTRG.8079	stl-vs-ftl	down	no	linc	chr2:7005699-7008239:+
MSTRG.8459	stl-vs-ftl	up	no	linc	chr2:8353228-8356073:+
MSTRG.8650	stl-vs-ftl	up	no	antisense	chr2:9256925-9258509:-
MSTRG.8762	stl-vs-ftl	up	no	linc	chr2:9653121-9654974:+
MSTRG.8770	stl-vs-ftl	down	yes	linc	chr2:9713587-9714344:-
MSTRG.8853	stl-vs-ftl	up	no	linc	chr2:10064186-10065622:+
MSTRG.8978	stl-vs-ftl	down	no	antisense	chr2:10653577-10655094:+
MSTRG.9095	stl-vs-ftl	up	no	antisense	chr2:11147890-11149404:+
MSTRG.9305	stl-vs-ftl	down	no	antisense	chr2:11961005-11961937:+
MSTRG.9356	stl-vs-ftl	down	no	antisense	chr2:12172939-12174063:+
MSTRG.944	stl-vs-ftl	down	no	antisense	chr1:2956570-2957190:+
MSTRG.9688	stl-vs-ftl	down	no	antisense	chr2:13489250-13489629:+
MSTRG.9768	stl-vs-ftl	down	yes	antisense	chr2:13730246-13731280:-
